# Supplementary material for: Myxospermy Evolution in Brassicaceae: A Highly Complex and Diverse Trait with Arabidopsis as an Uncommon Model
Source: MDPI journal article supplement (doi:10.3390/cells10092470), 2021-09-18
Supplement: s1 [file s1]

Viudes et al Fig. S1 (2 pages; legend on page 2)

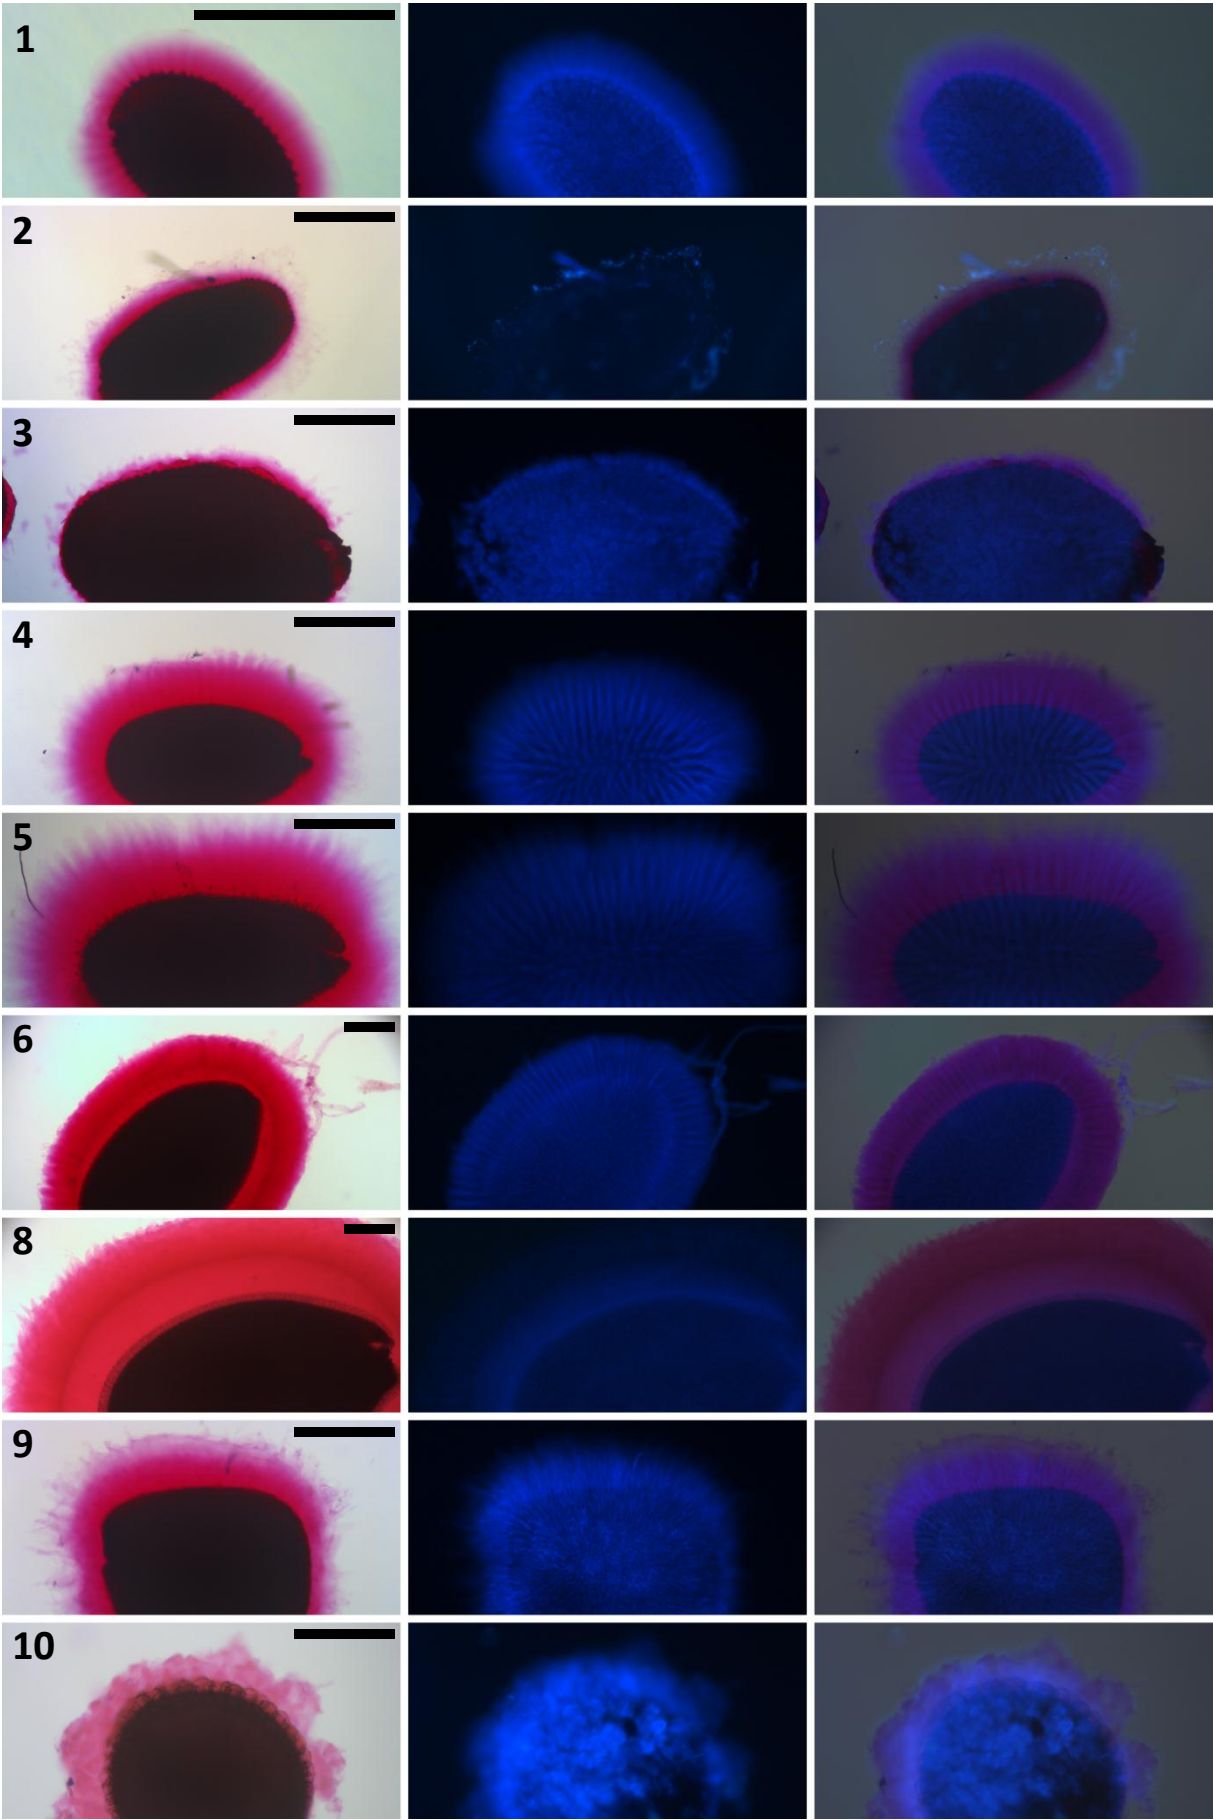

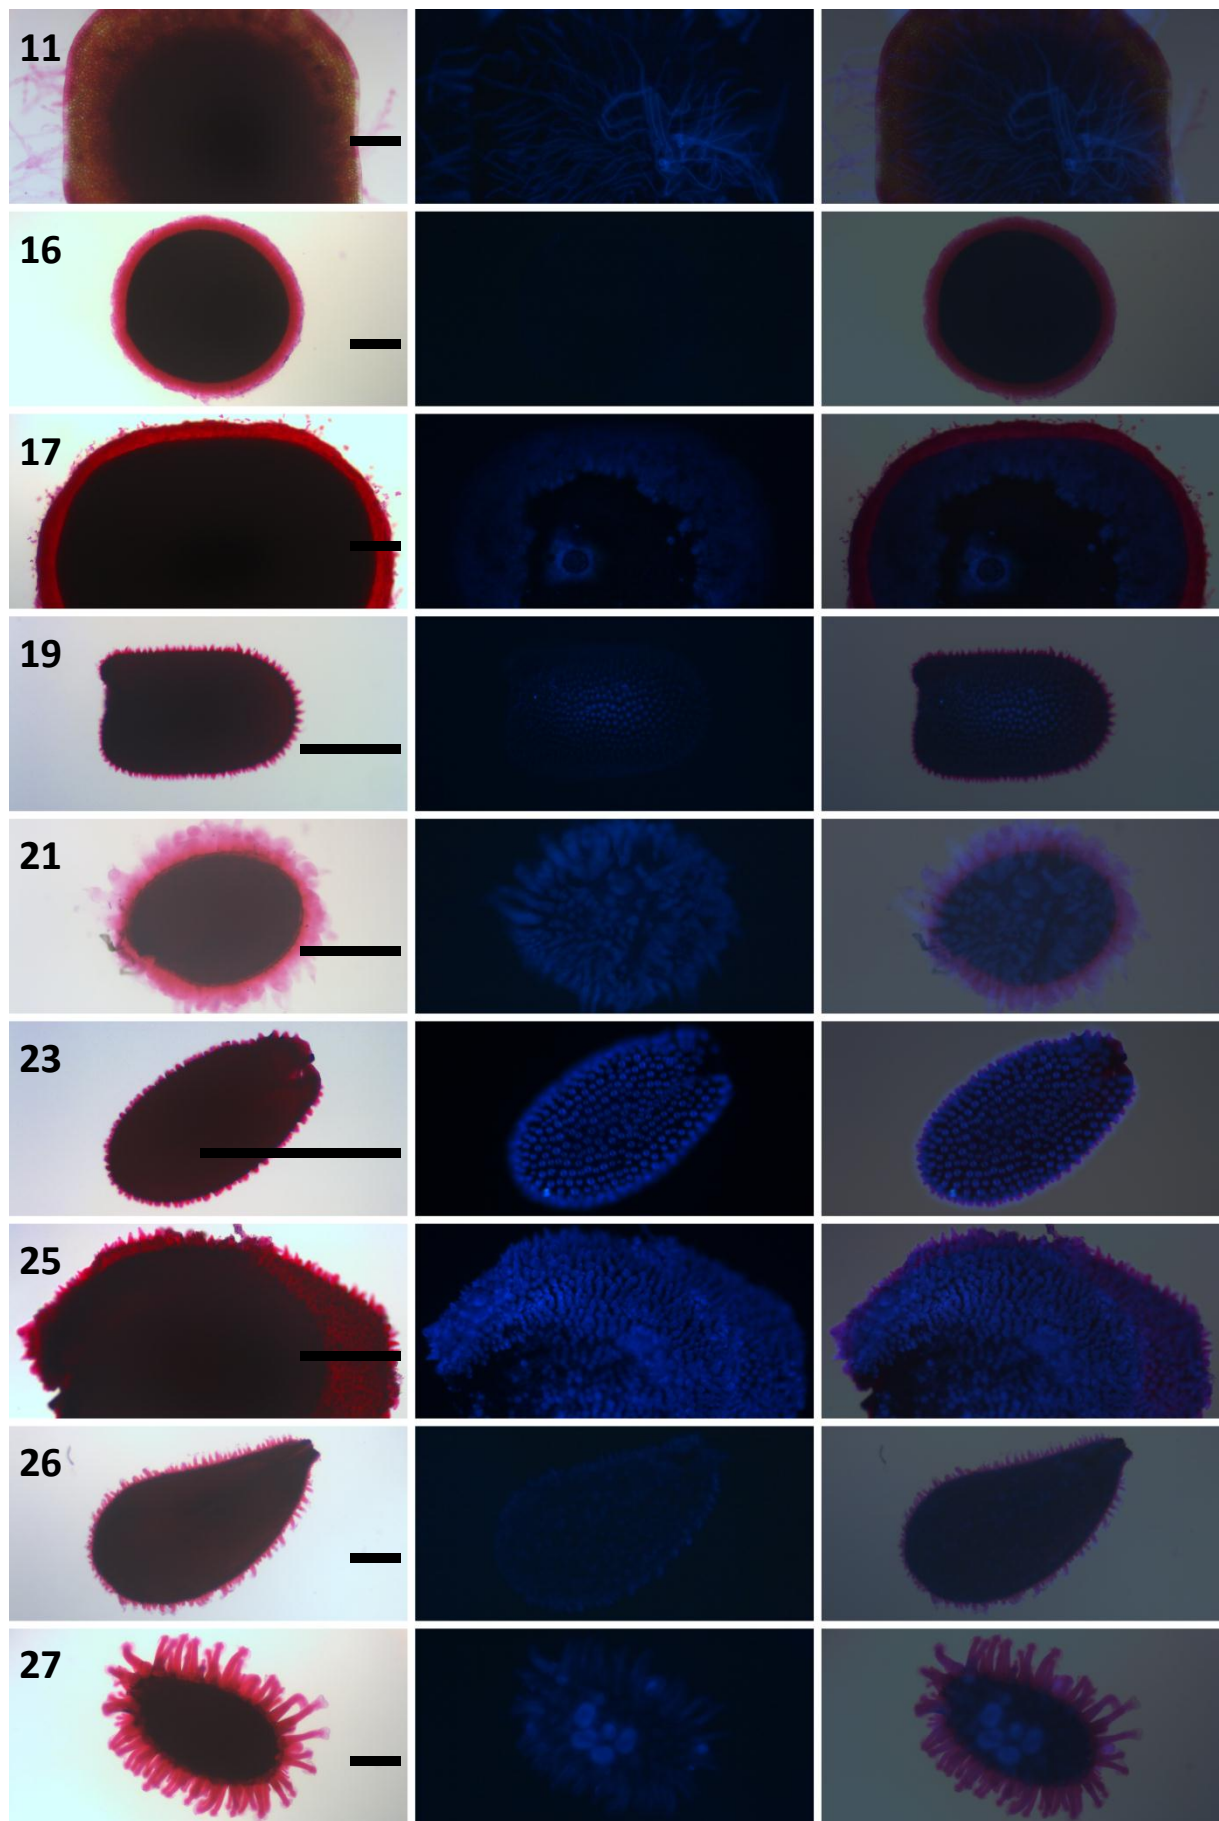

**Figure S1: Ruthenium red and calcofluor double staining for the 19 myxospermous species highlights the cellulosic part contained in seed mucilage.** Species numbers presented in Fig. 1 were used to label the images (only the myxospermous species are shown here). Column 1 images correspond to the ruthenium red staining after vigorous shaking shown in Fig. 2. Column 2 shows the same seed under UV light to reveal the calcofluor labelling which is specific to cellulose. Column 3 is the merge of column 1 and 2 with a transparency set up at 70% for black background images. Bars: 500  $\mu$ m.
