# Supplementary material for: Myxospermy Evolution in Brassicaceae: A Highly Complex and Diverse Trait with Arabidopsis as an Uncommon Model
Source: MDPI journal article supplement (doi:10.3390/cells10092470), 2021-09-18
Supplement: s1 [file s1]

Viudes et al Fig. S2 (2 pages; legend on page 2)

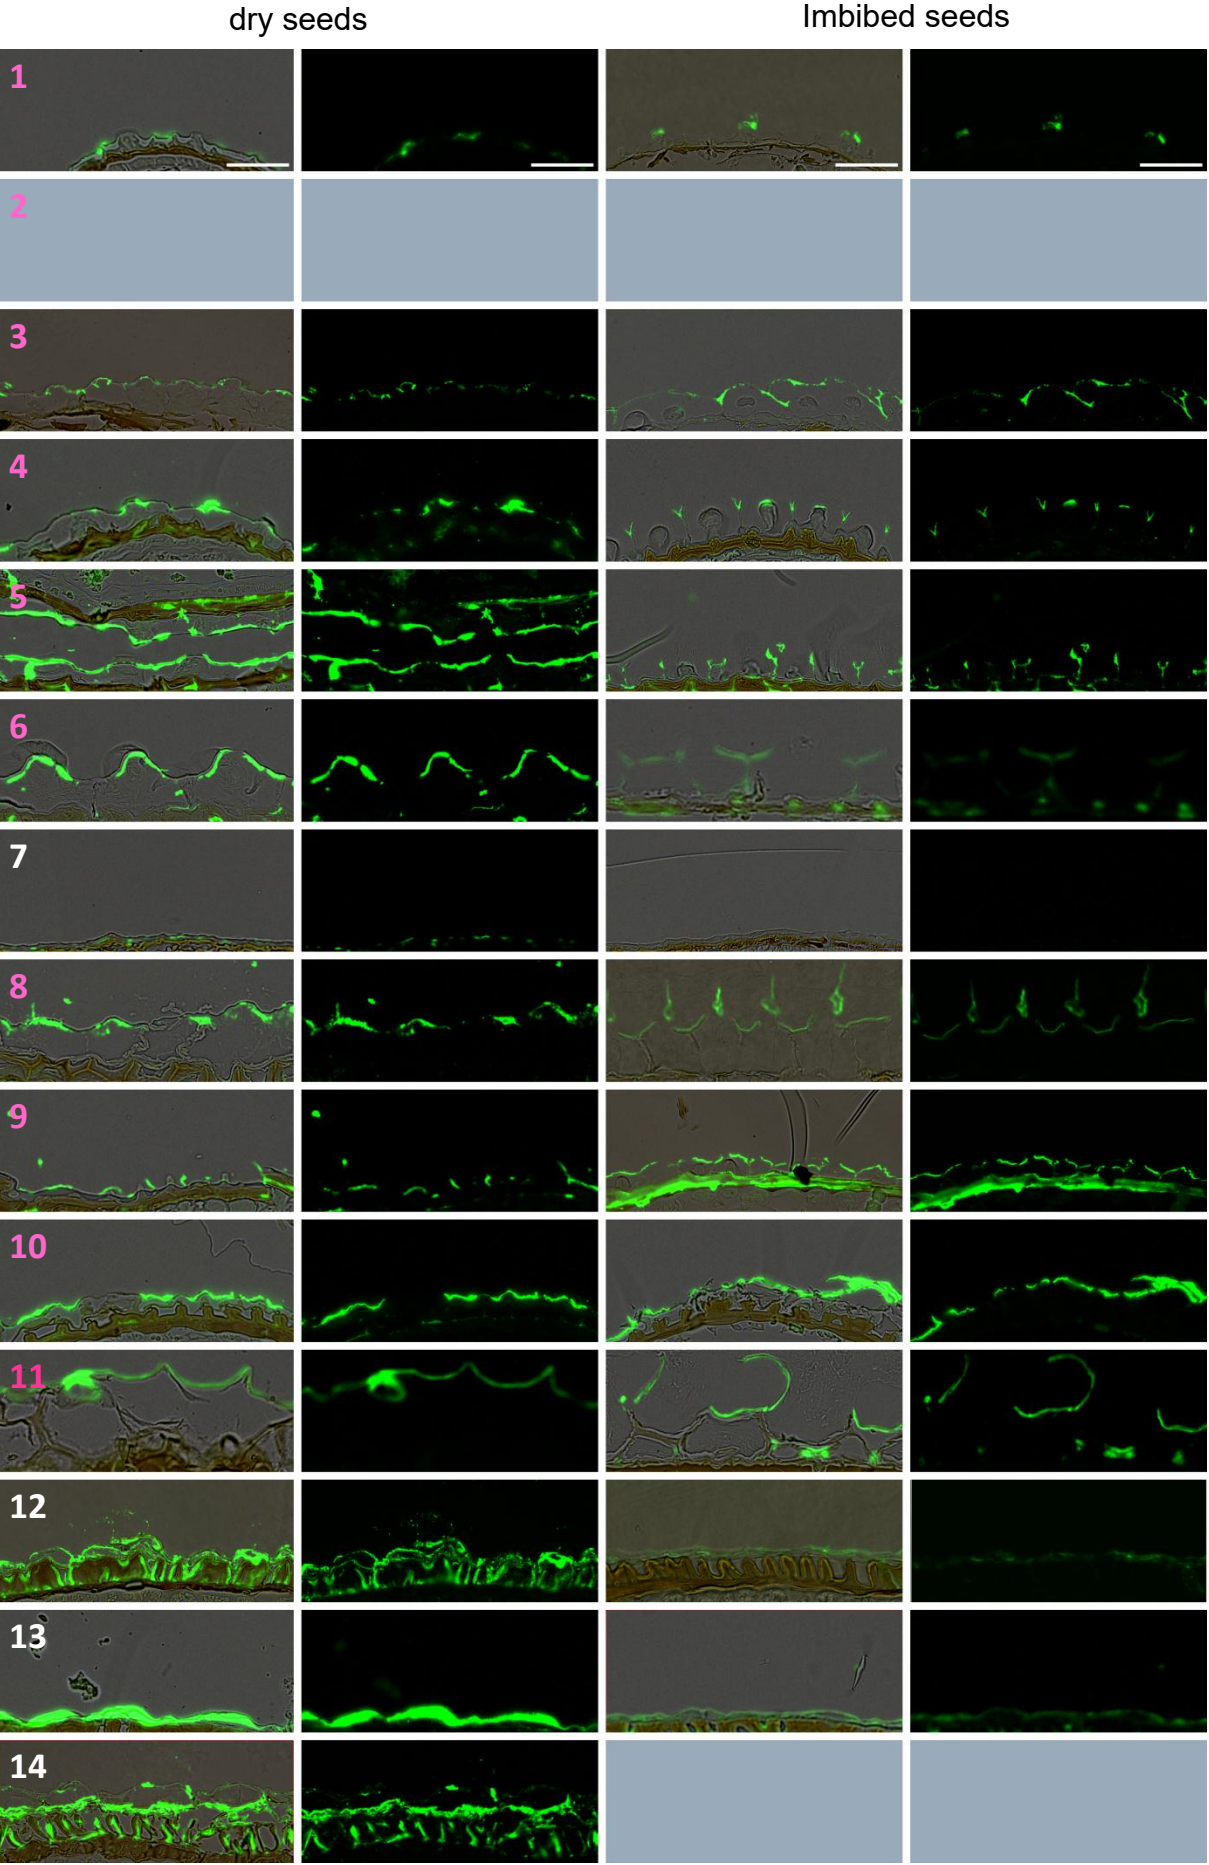

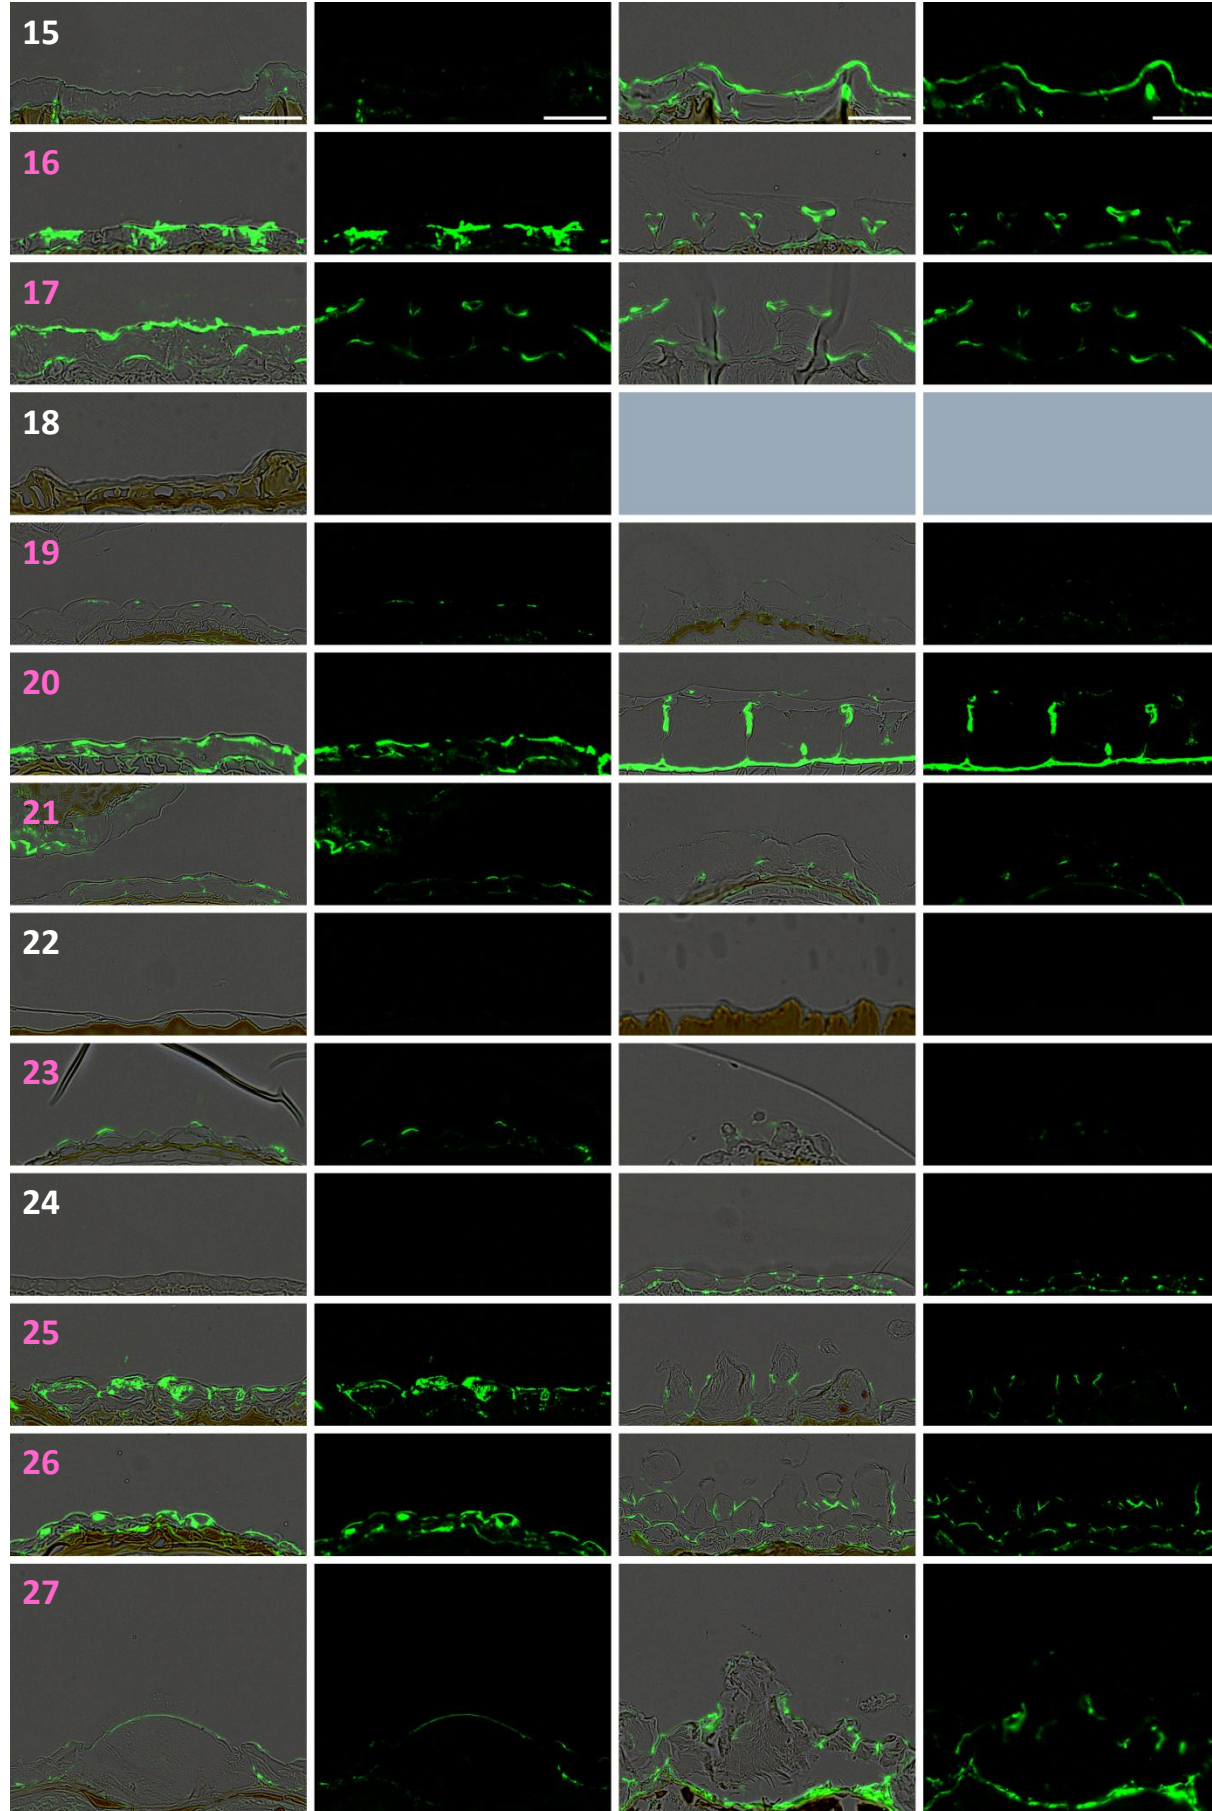

**Figure S2: Immunofluorescence survey of the putative occurrence of a topochemical signature of the cell wall domain rupture zone in dry and imbibed seeds using the LM20 antibody.** Serial sections of tissue arrays used for toluidine blue staining were used for immunofluorescence labeling with LM20 anti-partially demethylesterified homogalacturonan. This antibody has been previously shown to label the prefragilized cell wall microdomain that is ruptured upon *A. thaliana* seed imbibition (Francoz et al. 2019). Note the recurrent occurrence of punctuated labeling in the epidermal/MS cell walls. Species numbers defined in Fig. 1 were colored in pink and white for myxospermous and non-myxospermous species, respectively. Grey panels correspond to unavailable or unexploitable samples. Bars: 50  $\mu$ m.
