# Supplementary material for: Myxospermy Evolution in Brassicaceae: A Highly Complex and Diverse Trait with Arabidopsis as an Uncommon Model
Source: Cells. 2021 Sep 18;10(9):2470. doi: 10.3390/cells10092470 (PMC8469493; doi:10.3390/cells10092470)
Supplement: Supplementary file 1 [file cells-10-02470-s001.zip]

Archive with 6 entries (6 files):
- Viudes et al_Figure S1.pdf
- Viudes et al_Figure S2.pdf
- Viudes et al_Table S10.xlsx
- Viudes et al_Table S1-S3.xlsx
- Viudes et al_Table S4.xlsx
- Viudes et al_Table S5-S9.xlsx
