# Supplementary material for: Myxospermy Evolution in Brassicaceae: A Highly Complex and Diverse Trait with Arabidopsis as an Uncommon Model
Source: Cells. 2021 Sep 18;10(9):2470. doi: 10.3390/cells10092470 (PMC8469493; doi:10.3390/cells10092470)
Supplement: Supplementary file 1 [file cells-10-02470-s001.zip › Viudes et al_Table S1-S3.xlsx]

## Sheet: Table S1
Table S1: A. thaliana MSC tool box genes. The 105 genes are classified according to their role and their phenotypic impact on SM in corresponding A. thaliana mutants. For each gene the associated references used to select and categorize them are provided. Note that some of these genes can be indirectly or poorly linked to myxospermy.
AGI Code	Gene name	Gene abbreviation	Protein type	Role	Impact	Refs
At1g24260	SEPALLATA3	SEP3		Regulation	High	Renard et al. (2020)
At1g76880	DE1 BINDING FACTOR 1	DF1	Putative TF	Regulation	High	Vasilevski et al. (2012)
At1g79840	GLABRA2	GL2	Homeobox TF	Regulation	High	Western et al. (2001), Johnson et al. (2002), Shi et al. (2012)
At1g80330	GIBBERELLIN 3-OXIDASE 4	GA3OX4	Gibberellic acid-3 oxidase	Regulation	High	Kim et al. (2005)
At2g32700	MUCILAGE-MODIFIED 1 / LEUNIG_HOMOLOG	LUH / MUM1	TUP1 family co-repressor	Regulation	High	Western et al. (2001), Bui et al. (2011), Huang et al. (2011), Walker et al. (2011)
At2g37260	TRANSPARENT TESTA GLABRA 2 / DR. STRANGELOVE 1	TTG2 / DSL1	WRKY TF	Regulation	High	Johnson et al. (2002), Shi et al. (2011)
At3g08850	REGULATORY-ASSOCIATED PROTEIN OF TARGET OF RAPAMYCIN 1B	RAPTOR1B	Scaffold protein	Regulation	High	Salem et al. (2017)
At3g13540	MYB DOMAIN PROTEIN 5	MYB5	R2R3-MYB TF	Regulation	High	Gonzalez et al. (2009), Li et al. (2009)
At4g09960	SEEDSTICK	STK	TF	Regulation	High	Mizzotti et al. (2014), Ezquer et al. (2016)
At4g32551	LEUNIG	LUG	TUP1 family co-repressor	Regulation	High	Bui et al. (2011), Walker et al. (2011)
At4g36920	APETALA 2	AP2	TF	Regulation	High	Western et al. (2001), Molina et al. (2008), Dean et al. (2011)
At5g24520	TRANSPARENT TESTA GLABRA 1	TTG1	WD40 repeat TF	Regulation	High	Penfield et al. (2001), Western et al. (2001), Johnson et al. (2002), Zhang et al. (2003), Li et al. (2009), Chen et al. (2015), Li et al. (2018)
At5g40330	MYB DOMAIN PROTEIN 23	MYB23	TF	Regulation	High	Matsui et al. (2005), Li et al. (2009)
At5g63840	RADIAL SWELLING 3	RSW3	GH31	Regulation	High	Burn et al. (2002)
At5g66730	ENHYDROUS / INDETERMINATE DOMAIN 1	ENY / IDD1	C2H2 zinc finger TF	Regulation	High	Feurtado et al. (2011)
At1g09540	MYB DOMAIN PROTEIN 61	MYB61	R2R3-MYB TF	Regulation	Medium	Penfield et al. (2001), Romano et al. (2012)
At1g62990	KNOTTED-LIKE HOMEOBOX OF ARABIDOPSIS THALIANA 7	KNAT7	TF	Regulation	Medium	Romano et al. (2012), Bhargava et al. (2013)
At4g09820	TRANSPARENT TESTA 8	TT8	bHLH TF	Regulation	Medium	Zhang et al. (2003), Baudry et al. (2006), Gonzalez et al. (2009)
At4g21030	DNA-BINDING WITH ONE FINGER 4.2	DOF4.2	TF	Regulation	Medium	Zou et al. (2013)
At5g23260	ARABIDOPSIS BSISTER / TRANSPARENT TESTA 16	ABS / TT16	MADS-box gene	Regulation	Medium	Dean et al. (2011), Ehlers et al. (2016)
At5g35550	TRANSPARENT TESTA 2	TT2	R2R3-MYB TF	Regulation	Medium	Gonzalez et al. (2009)
At1g17950	MYB DOMAIN PROTEIN 52	MYB52	R2R3-MYB TF	Regulation	Low	Shi et al. (2018)
At1g23420	INNER NO OUTER	INO	YABBY TF	Regulation	Low	McAbee et al. (2006), Kelley et al. (2009)
At1g32240	KANADI 2	KAN2	GARP family putative TF	Regulation	Low	McAbee et al. (2006), Kelley et al. (2009)
At1g52880	NAC-REGULATED SEED MORPHOLOGY 2	NARS2 / NAM	NAC-like TF	Regulation	Low	Kunieda et al. (2008)
At1g56650	MYB DOMAIN PROTEIN 75	MYB75	TF	Regulation	Low	Bhargava et al. (2013)
At1g63650	ENHANCER OF GLABRA 3	EGL3	bHLG TF	Regulation	Low	Zhang et al. (2003), Gonzalez et al. (2009)
At2g23760	BEL1-Like homeodomain 2	BLH4		Regulation	Low	Xu et al. (2020)
At2g42830	SHATTERPROOF 2	SHP2	MADS-box gene	Regulation	Low	Ehlers et al. (2016)
At3g15510	NAC-REGULATED SEED MORPHOLOGY 1	NARS1	NAC-like TF	Regulation	Low	Kunieda et al. (2008)
At3g54720	ALTERED MERISTEM PROGRAM 1	AMP1	Putative glutamate carboxypeptidase	Regulation	Low	Lopez-Garcia et al. (2016)
At3g58780	SHATTERPROOF 1	SHP1	MADS-box gene	Regulation	Low	Ehlers et al. (2016)
At4g11180	DIRIGENT PROTEIN 12	DIR12 / DP1	Dirigent Protein	Regulation	Low	Ranocha et al. (2014)
At4g34210	SHAGGY-like kinases 11	SK11	SHAGGY-like kinases	Regulation	Low	Li et al. (2018)
At4g36870	BEL1-Like homeodomain 4	BLH2	Homogalacturonana demethylesterification regulation	Regulation	Low	Xu et al. (2020)
At5g16560	KANADI 1	KAN1	GARP family putative TF	Regulation	Low	McAbee et al. (2006), Kelley et al. (2009)
At5g42630	ABERRANT TESTA SHAPE / KANADI 4	ATS / KAN4	Kanadi-family TF	Regulation	Low	Leon-kloosterziel et al. (1994), McAbee et al. (2006)
At5g60690	REVOLUTA	REV	Class III homeodomain leucine zipper	Regulation	Low	McAbee et al. (2006), Kelley et al. (2009)
At5g65410	HOMEOBOX PROTEIN 25 / ZINC FINGER HOMEODOMAIN 2	HB25 / ZFHD2	TF	Regulation	Low	Bueso et al. (2014)
At4g34470	SHAGGY-like kinases 12	SK12	SHAGGY-like kinases	Regulation	Low	Li et al. (2018)
At1g18580	GALACTURONOSYLTRANSFERASE 11	GAUT11	Glycosyl transferase 8	Pectin	High	Caffall et al. (2009), Voiniciuc et al. (2018)
At1g21070	UDP-Rha/UDP-Gal TRANSPORTER 2	URGT2	Nucleotide sugar transporter	Pectin	High	Rautengarten et al. (2014)
At1g28240	MUCILAGE-RELATED 70	MUCI70	Glycosyl transferase	Pectin	High	Voiniciuc et al. (2018)
At1g53500	MUCILAGE-MODIFIED 4 / RHAMNOSE BIOSYNTHESIS 2	MUM4 / RHM2	UDP-l-rhamnose synthase	Pectin	High	Western et al. (2001), Usadel et al. (2004), Western et al. (2004), Arsovski et al. (2009a), Shi et al. (2012)
At1g63930	FROM THE CZECH 'ROH' MEANING 'CORNER'	ROH1	DUF793	Pectin	High	Kulich et al. (2010)
At2g20650	transmembrane E3 ubiquitin ligase FLYING SAUCER 2	FLY2	TM, E3 ubiquitin ligase activity	Pectin	High	Kunieda et al. (2019)
At3g09820	ADENOSINE KINASE 1	ADK1	Adenosine kinase	Pectin	High	Moffatt et al. (2002)
At3g10380	SUBUNIT OF EXOCYST COMPLEX 8	SEC8	Exocyst subunit	Pectin	High	Kulich et al. (2010)
At3g51160	MURUS 1	MUR1	GDP-mannose4,6-dehydratase	Pectin	High	Shi et al. (2017)
At4g28370	transmembrane E3 ubiquitin ligase FLYING SAUCER 1	FLY1	TM, E3 ubiquitin ligase activity	Pectin	High	Voiniciuc et al. (2013), Griffiths et al. (2014), Kunieda et al. (2019)
At5g63800	MUCILAGE-MODIFIED 2 / BETA-GALACTOSIDASE 6	MUM2 / BGAL6	β-Galactosidase	Pectin	High	Western et al. (2001), Dean et al. (2007), Macquet et al. (2007), Arsovski et al. (2009a), Walker et al. (2011), Griffiths et al. (2014)
At1g02720	GALACTURONOSYLTRANSFERASE-LIKE 5	GATL5	Glycosyl transferase 8	Pectin	Medium	Kong et al. (2013)
At1g19900	RUBY PARTICLES IN MUCILAGE	RUBY	Carbohydrate-Active Enzymes	Pectin	Medium	Sola et al. (2019)
At1g23200	HIGHLY METHYLESTERIFIED SEEDS	HMS	Pectin methylesterase	Pectin	Medium	Levesque-Tremblay et al. (2015)
At1g27120	AGP GALACTOSYLTRANSFERASE 4	GALT4	Glycosyl transferase, family 31	Pectin	Medium	Basu et al. (2015)
At1g74800	AGP GALACTOSYLTRANSFERASE 5	GALT5	Glycosyl transferase, family 31	Pectin	Medium	Basu et al. (2015), Basu et al. (2016)
At2g18280	Tubby-like protein 2	TPL2		Pectin	Medium	Wang et al. (2019)
At2g47670	PECTIN METHYLESTERASE INHIBITOR 6	PMEI6	Pectin methylesterase inhibitor	Pectin	Medium	Saez-Aguayo et al. (2013), Francoz et al. (2019)
At3g06440	AGP GALACTOSYLTRANSFERASE 3	GALT3	Glycosyl transferase, family 31	Pectin	Medium	Basu et al. (2015)
At4g21060	AGP GALACTOSYLTRANSFERASE 2	GALT2	Glycosyl transferase, family 31	Pectin	Medium	Basu et al. (2015), Basu et al. (2016)
At5g04160	UDP-GlcA and UDP-GalA TRANSPORTER 1	UUAT1	Nucleotide sugar transporter	Pectin	Medium	Saez-Aguayo et al. (2017)
At5g05820	UDPARABINOFURANOSE TRANSPORTER 2	UUAT3		Pectin	Medium	Parra-Rojas et al. (2019)
At5g11230	UDP-URONIC ACID TRANSPORTER 3	UAFT2		Pectin	Medium	Parra-Rojas et al. (2019)
At5g15740	RG-I:rhamnosyltransferases 1	RRT1		Pectin	Medium	Takenaka et al. (2018)
At5g62620	AGP GALACTOSYLTRANSFERASE 6	GALT6	Glycosyl transferase, family 31	Pectin	Medium	Basu et al. (2015)
At1g56100	PECTIN METHYLESTERASE INHIBITOR 14	PMEI14	Pectin methylesterase inhibitor	Pectin	Low	Shi et al. (2018)
At5g49180	PECTIN METHYLESTERASE 58	PME58	Pectin methylesterase	Pectin	Low	Turban et al. (2016)
At3g29810	COBRA-LIKE 2	COBL2	Glycosylphosphatidylinisitol-anchored	Cellulose	High	Ben-Tov et al. (2015), Ben-Tov et al. (2018)
At5g09870	MUCILAGE-MODIFIED 3 / CELLULOSE SYNTHASE 5	MUM3 / CESA5	Cellulose synthase subunit	Cellulose	High	Sullivan et al. (2011), Harpaz-Saad et al. (2011), Mendu et al. (2011), Griffiths et al. (2014), Griffiths et al. (2015), Basu et al. (2016,) Griffiths et al. (2016)
At2g35620	LEUCINE-RICH REPEAT RECEPTOR KINASE	FEI2	Leucine-rich receptor kinase	Cellulose	Medium	Harpaz-Saad et al. (2011), Basu et al. (2016), Griffiths et al. (2016)
At3g46550	SALT OVERLY SENSITIVE 5	SOS5	GPI-anchored fascilin-type AGP	Cellulose	Medium	Harpaz-Saad et al. (2011), Griffiths et al. (2014), Basu et al. (2016), Griffiths et al. (2016)
At4g39350	CELLULOSE SYNTHASE A2	CESA2	Cellulose synthase subunit	Cellulose	Medium	Mendu et al. (2011)
At2g21770	CELLULOSE SYNTHASE A9	CESA9	Cellulose synthase subunit	Cellulose	Low	Stork et al. (2010), Mendu et al. (2011)
At2g41770	STELLO 1	STL1	Transmembrane protein, DUF288	Cellulose	Low	Zhang et al. (2016)
At3g55940	Phospholipase C 7	PLC7	Phospholipase C	Cellulose	Low	van Wijik et al. (2018)
At3g57420	STELLO 2	STL2	Transmembrane protein, DUF288	Cellulose	Low	Zhang et al. (2016)
At5g58690	Phospholipase C 5	PLC5	Phospholipase C	Cellulose	Low	van Wijik et al. (2018)
At1g09330	ECHIDNA	ECH	Forms part of a TGF-localised	Secretion	High	Gendre et al. (2013), McFarlane et al. (2013)
At1g60780	ADAPTATOR PROTEIN 1 MEDIUM SUBUNIT	AP1M2	Adaptator protein complexe	Secretion	High	Shimada et al. (2018)
At2g35630	MICROTUBULE ORGANIZATION 1	MOR1	MAP215 microtubule-associated	Secretion	High	McFarlane et al. (2008)
At5g03540	EXOCYST SUBUNIT EXO70 FAMILY PROTEIN A1	EXO70A1	Exocyst subunit	Secretion	High	Kulich et al. (2010)
At2g18840	YPT/RAB GTPASE INTERACTING PROTEIN 4A	YIP4A	Forms part of a TGF-localised	Secretion	Low	Gendre et al. (2013)
At4g30260	YPT/RAB GTPASE INTERACTING PROTEIN 4B	YIP4B	Forms part of a TGF-localised	Secretion	Low	Gendre et al. (2013)
At2g22900	MUCILAGE-RELATED 10	MUCI10	GT34	Hemicellulose	Medium	Voiniciuc et al. (2015b)
At2g28110	IRREGULAR XYLEM7	IRX7	GT47	Hemicellulose	High	Hu et al. (2016b)
At3g10320	MUCILAGE-RELATED21 / MUCILAGE-MODIFIED 5	MUCI21 / MUM5	GT61	Hemicellulose	High	Voiniciuc et al. (2015a), Ralet et al. (2016)
At4g36890	IRREGULAR XYLEM14	IRX14	GT47	Hemicellulose	High	Voiniciuc et al. (2015a), Hu et al. (2016a)
At5g49360	BETA-XYLOSIDASE 1	BXL1	Bifunctional β-xylosidase/α-arabinosidase	Hemicellulose	High	Arsovski et al. (2009)
At5g22740	CELLULOSE SYNTHASE-LIKE A 2	CSLA2	Glucomannan synthase	Hemicellulose	High	Yu et al. (2014)
At5g67030	ABA DEFICIENT 1	ABA1	Zeaxanthin epoxidase	Hormone	High	Karssen et al. (1983)
At3g05120	GA INSENSITIVE DWARF1A	GID1A	Gibberellin receptor	Hormone	Low	Luchi et al. (2007)
At3g63010	GA INSENSITIVE DWARF1B	GID1B	Gibberellin receptor	Hormone	Low	Luchi et al. (2007)
At4g02780	GA REQUIRING 1	GA1	ent-Copalyl diphosphate synthase 1	Hormone	Low	Luchi et al. (2007)
At5g67360	SUBTILISIN-LIKE SERINE PROTEASE 1.7 / ARABIDOPSIS AG12	SBT1.7 / ARA12	Subtilisin-like serine protease	Extrusion	High	Rautengarten et al. (2008), Saez-Aguayo et al. (2013)
At3g50990	CLASS III PEROXIDASE 36	PRX36	Class III peroxidase	Extrusion	Medium	Kunieda et al. (2013), Francoz et al. (2019)
At5g23940	DEFECTIVE IN CUTICULAR RIDGES	DCR	Soluble BAHD acyltransferase	Cutin	High	Panikashvili et al. (2009)
At1g74160	TONNEAU1 RECRUTING MOTIF 4	TRM4		Microtubule	Medium	Yang et al. (2018)
At2g27600	SUPPRESSOR OF K+ TRANSPORT GROWTH DEFECT1	SKD1		Unknown	High	Shahriari et al. (2010)
At1g74450		ROH1D	DUF793	Unknown	Medium	Visscher et al. (2015)
At1g62000	TESTA ABUNDANT 1	TBA1		Unknown	Low	Tsai et al. (2017)
At1g62060	TESTA ABUNDANT 2	TBA2		Unknown	Low	Tsai et al. (2017)
At1g62080	TESTA ABUNDANT 3	TBA3		Unknown	Low	Tsai et al. (2017)
At3g56310	α-GALACTOSIDASE 3	AGAL3	α-galactosidase localised to CW	Unknown	Low	Imaizumi et al. (2017)
At5g08370	α-GALACTOSIDASE 2	AGAL2	α-galactosidase localised to CW	Unknown	Low	Imaizumi et al. (2017)
At5g15180	CLASS III PEROXIDASE 56	PRX56	Class III peroxidase	Unknown	Low	Ranocha et al. (2014)

## Sheet: Table S2
Table S2: List and seed provider of the 27 species phenotyped in this study.
Species number code	Species name	Lineage	Tribe	Seed Provider	Habitats	Seed dispersal
1	Arabidopsis thaliana (L.)	Lineage 1	Camelineae	Nathalie Séjalon-Delmas	Cultivated ground, meadows, disturbed land	Barochory
2	Arabidopsis lyrata (L.)	Lineage 1	Camelineae	Outi Savolainen	Cultivated ground, meadows, disturbed land	Barochory
3	Arabidopsis halleri (L.)	Lineage 1	Camelineae	Hélène Frérot	Cultivated ground, meadows, disturbed land	Barochory
4	Capsella rubella (Reut.)	Lineage 1	Camelineae	Tanja Slotte	Wet meadows, forest edges and ruderal sites	Annemochory
5	Capsella grandiflora (Fauché & Chaub.)	Lineage 1	Camelineae	Tanja Slotte	Cultivated and often subspontaneous	Barochory
6	Camelina sativa (L.)	Lineage 1	Camelineae	Christophe Dunand	Clearings, selvedges and scree, sandy fields	Barochory
7	Boechera stricta (Graham)	Lineage 1	Boechereae	Kemal Melik Taskin	Rocky and gravelly soil, open forest	Annemochory
8	Lepidium sativum (L.)	Lineage 1	Lepidieae	Nathalie Séjalon-Delmas	Cultivated and often subspontaneous	Barochory
9	Cardamine hirsuta (L.)	Lineage 1	Cardamineae	Christophe Dunand	Hurdles, walls, rocks	Autochory
10	Rorippa islandica (Oeder ex Gunnerus)	Lineage 1	Cardamineae	B & T World Seed	Wet, sandy or muddy soils, shores	Hydrochory
11	Leavenworthia alabamica (Rollins)	Lineage 1	Cardamineae	Jeremiah Bush	Very wet cedar glades, even flooded	Annemochory
12	Brassica rapa (L.)	Lineage 2	Brassiceae	Nathalie Séjalon-Delmas	Field, roadside and ditches	Barochory
13	Brassica napus (L.)	Lineage 2	Brassiceae	Christophe Dunand	Cultivate everywhere	Barochory
14	Brassica oleracea (L.)	Lineage 2	Brassiceae	Christophe Dunand	Atlantic coastal cliffs of Western Europe	Barochory
15	Brassica juncea (L.)	Lineage 2	Brassiceae	Nathalie Séjalon-Delmas	Cultivate everywhere	Barochory
16	Brassica nigra (L.)	Lineage 2	Brassiceae	Nathalie Séjalon-Delmas	Cultivate everywhere	Barochory
17	Sinapis alba (L.)	Lineage 2	Brassiceae	Nathalie Séjalon-Delmas	Cultivate everywhere	Barochory
18	Raphanus sativus (L.)	Lineage 2	Brassiceae	Christophe Dunand	Field and roadside	Barochory
19	Sisymbrium irio (L.)	Lineage 2	Sisymbrieae	B & T World Seed	Roadside, rubble	Barochory
20	Stanleya pinnata (Pursh.)	Lineage 2	Thelypodieae	B & T World Seed	Plain, desert, rocky cliffs	Barochory
21	Schrenkiella parvula (Schrenk)	Lineage 2	Incertae sedis	Maheshi Dassanayake	Salt flats of ancient lakes and river beds	Barochory
22	Thlaspi arvense (L.)	Lineage 2	Thlaspideae	B & T World Seed	Cultivated places, rubble, roadside	Annemochory
23	Eutrema salsugineum (Pall.)	Lineage 2	Eutremeae	TAIR	Sea coasts, sandy alkaline soils	Barochory
24	Noccaea caerulescens (J.Presl & C.Presel)	Lineage 2	Coluteocarpeae	Hélène Frérot	Open environement, metalophill	Barochory
25	Arabis alpina (L.)	Lineage 4	Arabideae	B & T World Seed	Rocks and screes of the mountains	Annemochory
26	Aethionema grandiflorum (Boiss. & Hohen.)	Basal group	Aethionemeae	B & T World Seed	Rockery, mountain	Annemochory
27	Aethionema arabicum (L.)	Basal group	Aethionemeae	Klaus Mummenhoff	Unstable screes and stony trails	Annemochory

## Sheet: Table S3
Table S3: List and Genomics data origin of the 32 species used in this study. Note that species with number code 26 could not be genotyped while species with number codes A-F could not be phenotyped.
Species number code	Genus	Species	Abbreviation	Order	Family	Tribe	Genome version	Reference	Source
1	Arabidopsis	thaliana COL	ArathaCOL	Brassicales	Brassicaceae	Camelineae	Araport11	10.1093/nar/gkr1090	https://genome.jgi.doe.gov/portal/pages/dynamicOrganismDownload.jsf?organism=Phytozome
2	Arabidopsis	lyrata	Aralyr	Brassicales	Brassicaceae	Camelineae	2.1	10.1038/ng.807	https://genome.jgi.doe.gov/portal/pages/dynamicOrganismDownload.jsf?organism=Phytozome
3	Arabidopsis	halleri	Arahal	Brassicales	Brassicaceae	Camelineae	1.1	https://doi.org/10.1111/1755-0998.12604	https://genome.jgi.doe.gov/portal/pages/dynamicOrganismDownload.jsf?organism=Phytozome
4	Capsella	rubella	Caprub	Brassicales	Brassicaceae	Camelineae	1.1	10.1038/ng.2669	https://genome.jgi.doe.gov/portal/pages/dynamicOrganismDownload.jsf?organism=Phytozome
5	Capsella	grandiflora	Capgra	Brassicales	Brassicaceae	Camelineae	1.1	10.1038/ng.2669	https://genome.jgi.doe.gov/portal/pages/dynamicOrganismDownload.jsf?organism=Phytozome
6	Camelina	sativa	Camsat	Brassicales	Brassicaceae	Camelineae	2	https://doi.org/10.1038/ncomms4706	http://www.camelinadb.ca/
7	Boechera	stricta	Boestr	Brassicales	Brassicaceae	Boechereae	1.2	www.plantphysiol.org/cgi/doi/10.1104/pp.105.073981.	https://genome.jgi.doe.gov/portal/pages/dynamicOrganismDownload.jsf?organism=Phytozome
8	Lepidium	sativum	Lepsat	Brassicales	Brassicaceae	Lepidieae	1.1	https://genome.jgi.doe.gov/portal/Empfunrassicales/Empfunrassicales.info.html	https://genome.jgi.doe.gov/portal/pages/dynamicOrganismDownload.jsf?organism=Phytozome
9	Cardamine	hirsuta	Carhir	Brassicales	Brassicaceae	Cardamineae	1	https://doi.org/10.1038/nplants.2016.167	http://chi.mpipz.mpg.de/download/annotations/
10	Rorripa	islandica	Rorisl	Brassicales	Brassicaceae	Cardamineae	1.1	https://genome.jgi.doe.gov/portal/Empfunrassicales/Empfunrassicales.info.html	https://genome.jgi.doe.gov/portal/pages/dynamicOrganismDownload.jsf?organism=Phytozome
11	Leavenworthia	alabamica	Leaala	Brassicales	Brassicaceae	Cardamineae	1	https://doi.org/10.1038/ng.2684	https://www.ncbi.nlm.nih.gov/assembly/GCA_000411055.1/
12	Brassica	rapa	Brarap	Brassicales	Brassicaceae	Brassiceae	1	https://doi.org/10.1038/s41477-018-0289-4	http://www.genoscope.cns.fr/externe/plants/chromosomes.html
13	Brassica	napus	Branap	Brassicales	Brassicaceae	Brassiceae	5	DOI: 10.1126/science.1253435	http://www.genoscope.cns.fr/brassicanapus/data/
14	Brassica	oleracea	Braole	Brassicales	Brassicaceae	Brassiceae	1	https://doi.org/10.1038/s41477-018-0289-4	http://www.genoscope.cns.fr/externe/plants/chromosomes.html
15	Brassica	juncea	Brajun	Brassicales	Brassicaceae	Brassiceae	1	https://doi.org/10.1038/ng.3657	http://brassicadb.org/brad/datasets/pub/Genomes/Brassica_juncea/V1.5/
16	Brassica	nigra	Branig	Brassicales	Brassicaceae	Brassiceae	1	https://doi.org/10.1038/ng.3657	https://www.ncbi.nlm.nih.gov/assembly/GCA_001682895.1
17	Sinapis	alba	Sinalb	Brassicales	Brassicaceae	Brassiceae	1.1	https://genome.jgi.doe.gov/portal/Empfunrassicales/Empfunrassicales.info.html	https://genome.jgi.doe.gov/portal/pages/dynamicOrganismDownload.jsf?organism=Phytozome
18	Raphanus	sativus	Rapsat	Brassicales	Brassicaceae	Brassiceae	1	https://doi.org/10.1093/dnares/dsu014	ftp://ftp.kazusa.or.jp/pub/radish/
19	Sisymbrium	irio	Sisiri	Brassicales	Brassicaceae	Sisymbrieae	1	https://doi.org/10.1038/ng.2684	https://www.ncbi.nlm.nih.gov/assembly/GCA_000411075.1
20	Stanleya	pinnata	Stapin	Brassicales	Brassicaceae	Thelypodieae	1.1	https://genome.jgi.doe.gov/portal/Empfunrassicales/Empfunrassicales.info.html	https://genome.jgi.doe.gov/portal/pages/dynamicOrganismDownload.jsf?organism=Phytozome
21	Schrenkiella	parvula	Schpar	Brassicales	Brassicaceae		1	https://doi.org/10.1038/ng.889	https://www.ncbi.nlm.nih.gov/assembly/GCA_000218505.1
22	Thlaspi	arvense	Thlarv	Brassicales	Brassicaceae	Thlaspideae	1.1	https://genome.jgi.doe.gov/portal/Empfunrassicales/Empfunrassicales.info.html	https://genome.jgi.doe.gov/portal/pages/dynamicOrganismDownload.jsf?organism=Phytozome
23	Eutrema	salsugineum	Eutsal	Brassicales	Brassicaceae	Eutremeae	1	10.3389/fpls.2013.00046	https://genome.jgi.doe.gov/portal/pages/dynamicOrganismDownload.jsf?organism=Phytozome
24	Noccaea	caerulescens	Noccae	Brassicales	Brassicaceae	Colutocharpeae	1	https://doi.org/10.1104/pp.15.00619	https://www.ncbi.nlm.nih.gov/assembly/GCA_900406465.1
25	Arabis	alpina	Araalp	Brassicales	Brassicaceae	Arabideae	4	10.1038/nplants.2014.23	https://www.ncbi.nlm.nih.gov/assembly/GCA_000733195.1
27	Aethionema	arabicum	Aetara	Brassicales	Brassicaceae	Aethionemeae	1	https://doi.org/10.1038/ng.2684	ftp://ftp.ncbi.nlm.nih.gov/genomes/all/GCA/000/411/095/GCA_000411095.1_VEGI_AA_v_1.0
A	Capsella	bursa-pastoris	Capbur	Brassicales	Brassicaceae	Camelineae	1	https://doi.org/10.1111/tpj.13563	https://www.ncbi.nlm.nih.gov/assembly/GCA_001974645.1/
B	Eruca	vesicaria	Eruves	Brassicales	Brassicaceae	Brassiceae	1.1	https://genome.jgi.doe.gov/portal/Empfunrassicales/Empfunrassicales.info.html	https://genome.jgi.doe.gov/portal/pages/dynamicOrganismDownload.jsf?organism=Phytozome
C	Isatis	tinctoria	Isatin	Brassicales	Brassicaceae	Isatideae	1.1	https://genome.jgi.doe.gov/portal/Empfunrassicales/Empfunrassicales.info.html	https://genome.jgi.doe.gov/portal/pages/dynamicOrganismDownload.jsf?organism=Phytozome
D	Diptychocarpus	strictus	Dipstr	Brassicales	Brassicaceae	Chorisporeae	1.1	https://genome.jgi.doe.gov/portal/Empfunrassicales/Empfunrassicales.info.html	https://genome.jgi.doe.gov/portal/pages/dynamicOrganismDownload.jsf?organism=Phytozome
E	Lunnaria	annua	Lunann	Brassicales	Brassicaceae	Biscutelleae	1.1	https://genome.jgi.doe.gov/portal/Empfunrassicales/Empfunrassicales.info.html	https://genome.jgi.doe.gov/portal/pages/dynamicOrganismDownload.jsf?organism=Phytozome
F	Biscutella	laevigata	Bislae	Brassicales	Brassicaceae	Biscutelleae	1	https://doi.org/10.1105/tpc.15.00791	https://www.ncbi.nlm.nih.gov/assembly/GCA_900406315.1/
NA	Medicago	truncatula	Medtru	Fabales	Fabaceae	Faboideae	5.0	https://doi.org/10.1038/s41477-018-0286-7	https://medicago.toulouse.inra.fr/MtrunA17r5.0-ANR/
NA	Linum	usitatissimum	Linusi	Malpighiales	Linaceae		1	https://doi.org/10.1111/j.1365-313X.2012.05093.x	https://genome.jgi.doe.gov/portal/pages/dynamicOrganismDownload.jsf?organism=Phytozome
NA	Arabidopsis	thaliana SHA	ArathaSHA	Brassicales	Brassicaceae	Camelineae	2.5	https://www.biorxiv.org/content/10.1101/738880v2	https://genome.jgi.doe.gov/portal/pages/dynamicOrganismDownload.jsf?organism=Phytozome
