# Supplementary material for: Myxospermy Evolution in Brassicaceae: A Highly Complex and Diverse Trait with Arabidopsis as an Uncommon Model
Source: Cells. 2021 Sep 18;10(9):2470. doi: 10.3390/cells10092470 (PMC8469493; doi:10.3390/cells10092470)
Supplement: Supplementary file 1 [file cells-10-02470-s001.zip › Viudes et al_Table S4.xlsx]

## Sheet: Index
Table S4: Detailed genomic data mining of A. thaliana MSC toolbox gene orthologs among Brassicaceae species. The first index sheet gives for each A. thaliana MSC toolbox genes (in line) the numbers of putative orthologous genes in the different Brassicaceae species (in column). The orthologous nature of those genes was deciphered using blast and phylogenetic tree. Orthologous and co-orthologous g…
	Species identification code	ArathaCOL	Aralyr	Arahal	Capbur	Capcru	Capgra	Camsat	Boestr	Lepsat	Carhir	Rorisl	Leaala	Brarap	Branap	Braole	Brajun	Branig	Sinalb	Eruves	Rapsat	Isatin	Sisiri	Stapin	Schpar	Thlarv	Eutesa	Noccae	Araalp	Dipstr	Lunann	Bislae	Aetara
	Lineage	1												2															4	3	Clade C		Basal
	Tribe	Camelineae									Cardamineae			Brassiceae																	Biscutelleae
	Species name	Arabidopsis thaliana	Arabidopsis lyrata	Arabidopsis halleri	Capsella bursa-pastoris	Capsella rubella	Capsella grandiflora	Camelina sativa	Boechera stricta	Lepidium sativum	Cardamine hirsuta	Rorripa islandica	Leavenworthia alabamica	Brassica rapa	Brassica napus	Brassica oleraceae	Brassica oleraceae	Brassica nigra	Sinapis alba	Eruca vesicaria	Raphanus sativus	Isatis tinctoria	Sisymbrium irio	Stanleya pinnata	Schrenkiella parvula	Thaspi avense	Eutrema salsugineum	Noccae caerulescens	Arabis alpina	Dipterocarpus strictus	Lunaria annua	Biscutella laevigata	Aethionema arabicum
AGI Code	Gene abreviation	1	2	3	A	4	5	6	7	8	9	10	11	12	13	14	15	16	17	B	18	C	19	20	21	22	23	24	25	D	E	F	27
At1g02720	GATL5	1	1	0	2	1	1	4	1	0	1	1	0	1	2	1	2	0	1	1	1	0	1	1	1	1	1	0	0	0	0	0	1
At1g09330	ECH	1	1	1	2	1	1	3	2	2	1	1	3	3	5	3	4	0	3	5	3	2	1	3	1	2	1	1	1	1	2	3	2
At1g09540	MYB61	1	1	1	2	1	1	3	1	2	1	1	2	3	6	3	6	0	3	4	3	1	1	0	1	1	1	1	1	1	3	2	1
At1g17950	MYB52	1	1	1	2	1	1	3	1	2	1	1	1	2	6	2	4	0	3	2	2	3	1	0	1	1	1	1	1	1	2	2	1
At1g18580	GAUT11	1	1	1	2	1	1	4	1	2	1	1	3	3	7	3	5	0	4	4	3	4	1	1	2	1	1	1	1	1	1	2	1
At1g19900	RUBY	1	1	1	2	1	1	3	1	6	1	1	1	4	11	6	0	0	3	3	4	4	1	2	1	1	1	1	2	1	2	3	1
At1g21070	URGT2	1	1	1	2	1	1	3	1	2	1	1	2	2	4	3	3	0	1	1	1	3	1	1	1	1	1	1	1	1	2	2	1
At1g23200	HMS	1	1	1	3	1	1	4	1	2	1	1	1	1	2	1	2	1	1	2	1	2	1	1	1	1	1	1	1	1	1	0	1
At1g23420	INO	1	1	1	2	1	1	3	1	2	1	1	2	2	4	2	4	1	2	2	2	3	1	0	1	1	1	1	1	1	2	1	1
At1g24260	SEP3	1	1	1	2	1	1	4	1	2	3	1	2	3	7	4	7	0	5	4	2	2	1	0	1	1	1	1	1	1	2	3	1
At1g27120	GALT4	1	0	1	2	1	1	3	1	2	1	1	2	2	8	3	4	0	4	3	10	3	1	2	1	1	1	1	1	1	2	2	1
At1g28240	MUCI70	1	1	1	2	1	1	3	1	2	1	1	2	3	7	2	6	0	4	4	3	3	1	2	1	1	1	1	1	1	2	2	1
At1g32240	KAN2	1	1	2	2	1	1	3	1	2	2	1	2	3	7	3	3	0	4	3	2	2	1	2	2	1	1	1	1	1	2	2	2
At1g52880	NARS2 / NAM	1	1	0	2	1	1	4	1	1	1	1	1	1	2	1	0	0	2	2	1	3	1	3	1	1	1	1	1	1	1	1	2
At1g53500	MUM4 / RHM2	1	1	1	3	1	1	5	1	2	1	1	4	2	5	3	7	1	2	3	5	3	1	1	1	1	1	1	0	1	2	2	1
At1g56100	PMEI14	8	4	4	4	3	3	12	6	2	6	3	2	1	2	1	1	0	3	0	1	7	2	1	1	2	2	1	1	1	3	2	1
At1g56650	MYB75	4	5	3	15	3	7	20	2	15	4	6	7	3	8	4	7	2	4	12	6	6	5	1	3	1	1	3	1	4	6	2	3
At1g60780	AP1M2	1	1	0	2	1	1	3	1	2	1	1	1	2	5	3	3	0	2	2	2	5	1	1	2	1	1	1	1	1	2	2	1
At1g62000; At1g62060; At1g62080	TBA1; TBA2; TBA3	5	5	3	13	7	2	17	1	3	1	1	4	5	9	4	4	0	3	10	1	0	8	6	5	2	2	2	3	6	0	0	0
At1g62990	KNAT7	1	1	0	2	1	1	3	1	2	1	1	1	2	6	3	4	0	2	4	4	5	1	0	1	1	1	2	1	1	2	3	2
At1g63650	EGL3	1	1	1	2	1	1	3	1	2	1	1	1	2	5	2	2	0	3	3	3	8	1	2	1	1	1	1	0	1	2	2	1
At1g63930	ROH1	1	1	1	2	1	1	4	1	2	1	1	1	1	2	1	1	0	2	1	2	4	1	1	1	1	1	1	1	1	2	1	1
At1g74160	TRM4	2	2	2	4	2	2	8	2	2	4	2	3	2	6	3	7	1	4	5	3	10	3	4	3	2	2	2	1	2	3	3	3
At1g74450	ROH1D	2	2	2	4	2	2	7	2	3	2	2	5	3	7	4	5	0	3	4	3	10	2	1	2	2	2	2	2	2	4	2	2
At1g74800	GALT5	1	1	1	2	1	1	4	1	2	1	1	2	2	5	2	4	1	2	4	7	3	1	2	2	1	1	1	1	1	1	4	2
At1g76880	DF1	1	1	1	2	1	1	4	1	2	1	1	2	3	6	3	5	1	3	6	5	1	2	0	1	1	1	2	1	1	2	2	1
At1g79840	GL2	1	0	1	2	1	1	4	1	2	2	1	1	1	2	1	1	1	1	1	1	1	1	3	2	1	1	1	1	1	1	3	1
At1g80330	GA3OX4	1	1	1	2	1	1	1	1	1	1	1	2	1	2	1	2	0	1	3	1	1	1	1	1	1	1	4	0	1	1	2	1
At2g18280	TPL2	1	1	0	2	1	1	3	1	2	1	1	2	1	2	1	2	0	1	2	1	4	1	1	2	1	1	1	0	1	3	3	3
At2g18840	YIP4A	1	1	1	2	1	1	4	1	2	1	1	0	0	0	0	0	0	0	0	0	8	1	0	2	1	0	0	0	1	2	3	2
At2g20650	FLY2	1	1	1	2	1	1	2	1	2	5	1	1	1	2	1	2	0	2	2	1	3	1	1	1	1	1	1	0	1	1	1	1
At4g28370	FLY1	1	1	1	3	1	1	4	1	2	1	1	2	1	2	1	2	0	1	2	1	3	1	2	1	1	1	1	0	0	2	2	1
At2g21770	CESA9	1	1	1	0	0	0	0	0	0	0	0	0	0	0	0	0	0	0	0	0	0	0	0	0	0	0	0	0	1	1	1	1
At4g39350	CESA2	1	1	1	2	1	1	3	1	2	1	1	1	1	2	1	2	1	0	0	0	4	1	0	1	1	1	1	0	0	2	0	1
At5g09870	MUM3 / CESA5	1	1	1	2	1	1	4	1	2	1	1	2	1	2	1	2	1	2	1	1	2	1	1	1	1	1	1	1	1	2	1	0
At2g22900	MUCI10	1	1	1	2	1	1	3	1	3	1	1	2	1	2	1	2	0	1	2	3	4	2	0	1	1	1	1	0	1	1	3	1
At2g23760	BLH4	1	1	1	2	1	1	3	1	2	1	1	1	2	4	2	5	1	4	4	5	5	1	1	2	1	1	1	0	1	1	4	1
At4g36870	BLH2	1	1	1	2	1	1	4	1	2	1	1	1	2	4	2	4	1	2	3	2	3	1	0	1	1	1	1	0	1	2	2	2
At2g27600	SKD1	1	1	1	2	1	1	7	1	2	1	1	3	2	4	3	4	2	3	3	2	3	1	2	1	1	1	1	0	0	2	3	0
At2g28110	IRX7	1	1	1	2	1	1	3	1	2	1	1	1	2	5	2	4	3	2	5	2	4	1	2	1	1	1	1	1	1	1	1	1
At2g32700	LUH / MUM1	1	1	1	2	1	1	4	1	2	3	1	3	4	10	6	7	3	3	3	8	7	1	2	1	1	1	1	0	1	2	3	2
At2g35620	FEI2	1	1	1	2	1	1	5	1	2	2	1	1	3	6	3	6	2	2	6	3	4	1	2	1	1	1	0	0	1	2	0	0
At2g35630	MOR1	2	2	2	5	2	2	4	2	5	3	2	1	3	10	2	1	3	2	4	4	2	1	2	1	1	1	1	1	1	2	3	6
At2g37260	TTG2 / DSL1	1	1	1	2	1	1	4	1	2	3	1	1	2	5	2	5	2	2	2	2	4	1	1	1	1	1	1	0	1	1	2	1
At2g41770	STL1	1	3	1	2	1	1	4	1	2	1	1	2	2	4	2	4	2	2	3	2	4	1	1	1	1	1	1	1	1	2	2	1
At3g57420	STL2	1	1	1	2	1	1	4	1	2	3	1	0	0	0	0	0	0	0	0	0	3	0	1	1	1	1	1	1	1	1	1	0
At3g58780	SHP1	1	1	2	3	1	1	3	1	2	4	1	2	3	9	3	5	3	2	7	3	3	1	1	2	1	1	1	0	1	1	1	2
At2g42830	SHP2	1	1	1	2	1	1	3	1	2	2	1	2	1	4	1	1	0	1	2	4	6	2	0	4	1	1	2	0	1	3	1	0
At2g47670	PMEI6	1	1	1	2	1	1	3	1	2	1	1	2	2	2	2	4	2	2	2	3	1	1	0	1	1	1	1	1	1	2	1	1
At3g05120	GID1A	1	1	1	2	1	1	3	1	2	1	1	2	1	2	1	2	1	2	3	1	2	1	1	1	1	1	1	1	1	1	1	1
At3g06440	GALT3	1	1	1	2	1	1	3	1	2	1	1	1	1	1	1	2	1	1	2	1	2	1	1	1	1	1	1	0	1	1	2	1
At3g08850	RAPTOR1B	1	1	1	2	1	1	3	1	2	1	1	4	1	4	3	4	4	3	3	3	2	1	2	1	1	1	1	1	1	1	2	1
At3g09820	ADK1	1	1	1	2	1	1	18	1	2	2	1	2	1	2	1	2	1	2	1	7	5	1	2	1	1	1	1	1	1	1	2	1
At3g10320	MUCI21 / MUM5	1	1	1	2	1	1	3	1	2	1	1	1	1	2	1	1	1	1	1	1	2	1	2	1	1	1	1	1	1	2	2	1
At3g10380	SEC8	1	2	1	2	1	1	9	1	2	1	1	2	4	6	3	8	4	3	4	3	4	2	2	1	1	1	1	0	1	2	2	1
At3g13540	MYB5	1	1	1	2	1	1	3	1	2	1	1	1	2	4	2	6	4	1	3	2	5	1	2	1	1	1	1	1	1	2	1	1
At3g15510	NARS1	1	1	1	2	1	1	3	1	2	1	1	1	3	6	3	5	3	3	3	3	2	1	2	1	1	1	1	1	1	2	1	0
At3g29810	COBL2	1	1	2	1	1	1	4	1	2	2	1	1	2	6	7	4	0	2	4	2	5	1	1	1	1	1	1	0	1	1	1	1
At3g46550	SOS5	1	1	1	4	1	1	3	1	2	1	1	2	1	2	1	2	0	2	2	2	4	1	1	2	1	1	1	1	1	2	3	1
At3g50990	PRX36	1	1	0	2	1	1	3	1	1	0	0	0	1	2	1	1	1	1	1	0	0	1	0	1	1	1	0	1	1	0	0	1
At3g51160	MUR1	2	2	2	2	2	2	8	2	4	3	2	3	5	12	6	10	5	4	7	5	3	2	2	2	2	1	2	2	2	3	2	2
At3g54720	AMP1	1	1	1	3	1	1	3	2	2	2	1	1	2	4	3	4	3	3	6	3	3	1	2	3	1	1	1	1	1	1	2	1
At3g55940	PLC7	1	1	0	4	2	1	3	1	2	1	1	1	2	5	2	4	1	2	4	5	9	2	4	2	1	1	1	1	2	1	1	2
At3g56310	AGAL3	1	1	1	2	1	1	5	1	2	1	1	1	2	4	2	3	1	1	1	1	2	1	2	1	1	1	1	1	1	1	1	1
At3g63010	GID1B	1	1	1	2	1	1	3	1	2	2	2	3	2	6	3	6	3	2	5	4	3	1	0	1	1	1	1	1	2	2	1	1
At4g02780	GA1	1	1	1	3	1	1	6	1	2	1	1	1	2	5	1	4	0	4	2	2	3	1	2	2	1	1	1	1	1	1	4	1
At4g09820	TT8	1	1	1	2	1	1	5	1	2	1	1	2	1	3	2	2	1	2	2	1	4	1	2	1	1	1	1	1	2	1	5	0
At4g09960	STK	1	1	1	2	1	1	3	1	2	2	1	1	2	4	3	3	1	1	2	2	2	2	2	1	1	1	1	0	1	2	1	1
At4g11180	DIR12 / DP1	3	2	2	5	2	2	10	3	3	3	3	3	3	3	2	6	2	4	2	3	14	1	1	0	1	2	4	0	3	3	2	0
At4g21030	DOF4.2	4	3	2	7	4	3	10	3	4	8	4	3	10	23	13	16	4	12	14	7	21	3	4	6	3	14	5	2	2	3	2	2
At4g21060	GALT2	1	1	1	3	1	1	5	1	2	1	1	1	1	2	0	2	1	1	1	1	5	1	1	1	1	1	1	1	1	1	1	1
At4g30260	YIP4B	1	1	1	2	1	1	3	1	2	1	1	3	4	8	8	6	2	3	4	3	5	1	2	1	1	1	2	1	1	2	1	0
At4g32551	LUG	1	1	1	2	1	1	3	1	2	1	1	3	3	7	3	6	1	3	6	2	4	1	3	1	1	1	1	3	1	2	2	1
At4g34210; At4g34470	SK11; SK12	9	7	4	15	9	5	23	6	10	8	8	2	9	22	9	14	4	11	14	9	5	9	6	6	22	13	11	4	16	2	3	5
At4g36890	IRX14	1	1	1	2	1	1	3	1	2	2	1	2	1	4	2	2	1	1	2	1	2	1	2	1	1	1	1	1	1	2	1	1
At4g36920	AP2	1	1	1	2	1	1	4	1	2	1	1	3	2	5	2	3	1	2	3	2	4	1	0	1	1	1	1	1	1	2	2	1
At5g03540	EXO70A1	1	1	1	2	1	1	5	1	2	2	1	2	2	5	2	3	1	3	4	2	3	1	0	2	2	1	1	1	1	2	2	1
At5g04160	UUAT1	1	1	1	2	1	1	3	1	2	2	1	2	2	4	2	5	2	2	3	1	2	1	1	1	1	1	1	1	1	1	2	2
At5g05820	UUAT3	1	2	1	2	1	1	3	1	2	2	1	2	2	4	4	3	0	1	1	1	2	1	0	1	1	1	2	0	1	2	2	1
At5g08370	AGAL2	1	1	0	2	1	1	5	1	2	3	1	2	2	4	1	0	3	4	5	3	4	1	0	1	1	1	1	1	1	1	1	3
At5g11230	UAFT2	1	2	1	2	1	1	3	1	2	1	1	3	2	4	2	4	1	2	2	4	4	1	2	1	1	1	1	1	1	2	1	1
At5g15180	PRX56	1	2	2	4	2	2	3	2	2	1	1	0	2	4	2	4	1	2	3	2	3	1	0	1	1	1	1	0	1	2	2	1
At5g15740	RRT1	1	1	1	2	1	1	3	1	2	1	1	2	2	6	3	4	1	2	3	3	2	1	4	1	1	1	1	1	1	1	1	1
At5g16560	KAN1	1	1	1	2	1	1	3	1	2	1	1	3	3	7	3	5	2	4	4	3	3	1	0	1	1	1	1	1	1	2	2	1
At5g22740	CSLA2	1	1	1	4	1	1	4	1	2	1	1	3	3	6	3	4	1	4	6	4	4	2	4	1	1	1	2	1	1	2	5	1
At5g23260	ABS / TT16	1	1	1	3	1	1	4	1	2	1	1	2	3	6	2	6	2	2	4	3	1	1	1	1	1	1	1	1	1	2	2	1
At5g23940	DCR	1	1	1	2	1	1	3	1	2	1	1	2	2	4	2	4	0	2	3	2	3	1	0	1	1	1	1	1	1	2	1	1
At5g24520	TTG1	1	1	1	1	1	1	8	1	2	2	1	2	3	4	2	2	0	1	3	1	4	1	1	1	1	1	1	1	1	1	1	1
At5g35550	TT2	1	1	1	2	1	1	4	1	1	1	1	1	1	2	1	3	0	1	1	1	2	1	2	1	1	1	1	1	1	2	2	1
At5g40330	MYB23	1	1	1	2	1	1	3	1	2	1	1	0	1	1	1	2	1	2	1	1	5	0	2	2	1	1	1	1	1	1	3	1
At5g42630	ATS / KAN4	1	1	1	2	1	1	4	1	2	1	1	2	1	3	1	2	0	1	2	1	4	1	2	2	1	1	1	1	1	1	2	1
At5g49180	PME58	1	1	1	2	1	1	3	1	1	1	1	1	1	2	1	3	0	3	1	1	3	1	2	1	1	1	0	0	1	1	0	0
At5g49360	BXL1	1	1	1	3	1	1	3	1	2	1	1	2	4	7	4	8	2	3	4	4	3	1	1	2	1	1	1	1	1	3	5	1
At5g58690	PLC5	1	1	1	2	1	1	3	1	2	1	1	1	4	6	3	4	1	1	2	6	3	1	1	1	1	1	1	0	1	2	2	1
At5g60690	REV	1	1	1	4	1	1	5	1	2	2	1	2	2	8	6	4	0	3	2	3	3	1	2	1	1	1	1	1	1	2	6	1
At5g62620	GALT6	1	1	1	2	1	1	4	1	2	1	1	2	1	4	2	2	1	1	1	3	4	2	3	2	1	1	2	1	1	2	3	1
At5g63800	MUM2 / BGAL6	1	1	0	2	1	1	3	1	2	1	1	2	2	5	2	4	2	2	3	6	3	1	1	1	1	1	1	1	1	1	4	1
At5g63840	RSW3	1	1	0	2	1	1	4	1	2	1	1	2	2	8	2	4	2	1	1	6	3	1	1	1	1	1	1	1	1	2	7	1
At5g65410	HB25 / ZFHD2	1	1	0	2	1	1	3	1	2	1	1	3	3	5	3	6	3	3	4	2	3	1	0	1	1	1	1	1	1	2	1	1
At5g66730	ENY / IDD1	1	1	1	2	1	1	4	1	2	1	1	1	2	3	2	4	2	2	2	2	3	1	0	1	1	1	1	1	1	2	2	1
At5g67030	ABA1	1	1	1	2	1	1	3	1	2	5	1	2	2	5	2	4	2	2	5	4	7	1	0	1	1	1	1	1	1	1	2	2
At5g67360	SBT1.7 / ARA12	1	1	1	2	1	1	3	1	2	2	1	1	2	4	3	3	1	1	2	2	2	2	2	1	1	1	1	0	1	2	1	1

## Sheet: Yip4b
Back to index
>Arahal_Araha.13311s0003.1
ATGTCGCACAACGATACGATTCCGCTTTATCAATCATCTCAATCAGACATCGACGAGATTGAGAATATGATGAACGACAGTTTCCAATCAGGTCCCGGAACCGTTCTTCCAGCTCGACCACCGAGTCCGATCCGTCCGTCAATTCCCGTTTCATCCTCACCGTTCGTTCAATCCAATCTCCCACCGCTACCACCGTCGTCTTCTTCCTCTCAGAAGGTGATGCCTGTTCCAGCTCCTCCACCGCTCCCGTCGGTAGGTAACTCCAACAGCTCCGATGGTAACAAGAGCATTGGAGGGAGTGGATTCGGATCTCCGCCAAATACATTGACGGAGCCTGTATGGGATACTGTGAAGCGCGATCTGTCACGGATCGTGAGTAATTTGAAGCTTGTGGTGTTT…
>Aralyr_AL7G21890.t1
ATGTCGCACAACGATACGATTCCGCTTTATCAATCATCTCAATCAGACATCGACGAGATTGAGAATATGATGAACGATAGTTTCCAATCAGGTCCTGGAACCGTCCTTCCTGCTCGACCACCGAGTCCGATCCGTCCGTCAATTCCCGTTTCATCCTCACCGTTCGTTCAATCTAATCTTCCACCGCTACCACCGTCGTCTTCTTCCTCTCAGAAGGTGATGCCTGTTCCAGCTCCCCCGCCGCTTCCGTCGGTAGGTAACTCCAACAGCTCCGAAGGTAACAAGAGTATTGGAGGGAGTGGATTCGGATCTCCGCCAAATACATTGACGGAGCCTGTATGGGATACTGTGAAGCGCGATCTGTCACGGATCGTGAGTAATTTGAAGCTTGTGGTGTTT…
>Araalp_lcl_CM002875.1_KFK29588.1_15693
ATGTCGCACAACGATACAATCCCTCTTTACCAGTCATCTCAATCAGACATCGACGAGATCGAGAATATGATGAGCGACGGTTTTCAATCAGGTCCAGGAACCGTCCTTCCTGCTCGACCACCGAGTCCGATCCGTCCTTCTATACCCGTTTCTTCCTCACCGTTCGTCCAATCCAACCTCCCACCGCTTCCACCGTCGACTCAGAAGGTTACGCCTGTTCCAGTGCCACCGTCGGTAGGTAATTCGAGTAGCTCTGAAGGTTCGAAGAGTATTGGAGGAAGTGGATTTGGATCTCCACCAAATACATTGACGGAGCCTGTTTGGGATACTGTAAAGCGAGATCTGTCAAGGATCGTGAGTAATTTGAAGCTTGTTGTGTTTCCGAATCCGTATAGGGAA…
>ArathaCOL_AT4G30260.2
ATGAGATATTATGAAACGACGTCGTTTAGGGTAAGAACATTACGTCACACGTTTATTTTAATATTATTTTATCATCGCCCTCTTTGTAATTTCGACTTCTCTTCTTCGTCAGATCTGAATCTTAATTTCCCCCAAATCAAAGCTTTTGACCTAAATCCGTTTCCCGGGAAAAATAAATCAACAAACCATCACCGGAATCTTCAATATCTCTCCGGTGAAGAAAAAATGTCGCACAACGATACGATTCCGCTTTATCAATCATCTCAATCAGACATTGACGAGATTGAGAATATGATGAACGACAGTTTTCAATCAGGTCCCGGAACCGTGCTTCCTGCTCGACCACCGAGTCCGATCCGTCCGTCGATTCCCGTTTCATCCTCACCGTTCGTTCAATCC…
>Bislae_OVAU01007770.1_FGenesh1.1
ATGAAACTGAAACCGCTTGAAGACGGTCCCAAAACCATCGGAGGAAGCGGGTTCGAACCTCCGTCAAATACATTGACGGAGCCTGTATGGGATACTTCTGAAGTATTTGCCGTGGCATTTGCACTACTAGCAGCTGGGGCAGTGATCCTCACACTGAATGTGCTGCTCCTGGGAGGACATATAATCTTTTTCCAAAGCCTGAGTCTTCTGGGTTACTGTCTGGTTCCACTGGACATTGGAGCAGTAATCTGCATGTTGAAGGACAATGTGATACTGAAAATGATAGTTGTGTCTGTGACTCTTGCATGGAGCTCGTGGGCTGCTTATCCTTTCATGAGCGCCGCCGTGAACCCGAGAAGGAAAGCGCTTGCTCTCTACCCGGTCTTCCTCATGTATGTC…
>Braole_Parent=BolC1t00869H;Name=BolC1t00869H
ATGTCGCACAACGACACAGTTCCGCTATACCAATCGTCCCAGTCAGACATCGACGAGATCGAGAACATGATGAGCGAAGGTTTCCAATCGGGACCCGGGTCAGTCCTCCCCGCCCGTCCGCCGAGCCCGATCCGTCCATCGATACCCGTCACATCCTCCCCCTTGGTCCAATCCAACCTCCCGCCGCTTCCCCCTGCCCAGAAGGTGACGCCTGTTCCCGTCCCTCCGTCGGGAAGCAGCGGCTCGGAAGGTGGGAAGGCGATCGGGTTCGGGTCTCCGCCGAACACGTTGACGGAGCCGGTGTGGGATACGGTGAAGAGGGATCTGGCGAGGATAGTGAGTAATCTGAAGCTGGTGGTGTTTCCGAATCCGAATAGGGAGGATCCGGGGAAGGCGCTT…
>Braole_Parent=BolC2t10758H;Name=BolC2t10758H
ATGATCATGAGTAATCTGAAGCTGGTGGTGTTTCCAAATCCGAATAGGGAGGATCTTGGGAAGGCGTTTAGGGATTGGGATCTGTGGGGACCGTTTTTCTTCAAACCAGCCAAATTGTCCTCGAGAACCTTGGTATCAAGGCAGCCGAATCGCCCTCGAGGTAGCGTGTTGAGGCAAGGCTTTTGCGTTTCTGGGAATCCCGAAAGGTTAAGAAGCACTGCTGATAGTTTTGTACAATCACTTGAGGGAGAAAGGGATGAGAATTTTCCTCAAGAAGGTGTGGTCTGTGGTGGAGCTTTGTCGTACAGAAGTTTCGATCTACAAGGTTCCATGAGAGTTCATCATCACAACCCCAATTCTAGACCGCTTGAAGGTCTTCCCTACAGCTTAAACATGTAA
>Braole_Parent=BolC3t21189H;Name=BolC3t21189H
ATGTCTCACAACGATACGATTCCGCTCTACCAATCGTCCCAATCAGACATCGACGAGATCGAGAACATGATGAACGACGGATTCCAATCGGGTCCCGGAACCGTCCTCCCCGCTCGTCCCTCGATCCCCGTATCATCCTCTCCCTTCGTCCAATCCAACCTCCCTCCGCTTCCGCTGTCTTCATCCTCCGCCGCCCAGAAAGTGACCCCCGTCCCAGCCCCTCCGCCGCTTCCGCCGGCGGTTAACTTCGGCAGCTCGGAAGGCTCGAAGACGATCGGATTCGGGTCTCCGCCGAACACGTTGACGGAGCCGGTGTGGGACACGGTGAAGCGGGATCTGTCGAGGATCGTGAGTAACCTGAAGCTGGTGGTGTTTCCGAATCCGAATAGGGAGGATCCT…
>Braole_Parent=BolC4t24858H;Name=BolC4t24858H
ATGAATCTGCGAAAGAAGCCATTATCAAAGAGGTTTGGACCTCGAGGGCGATTTGGCTGGCTTGAAGAAAAACGGTCCCCACAGATCCCAATCCCTAAACGCCTTCCCAAGATTCTCCCTATTCGGATTTGGAAATACCACCAGCTTCAGATTACTCATGATCATCGACAAATCCCTCTTCACCGTATCCCACACCGGCTCCGTCAACGTGTGCGGCTGAGACCCGAACCCGCTCCCCCCGATCGTCCTCGAACCTTCAAGCTGCCGAAGTTACCTGCCGGCGGAAGCGACGGAGGGGCTGAAACGGGCGTCACTTTCTGGGAGTTAAATGAAGCTGTGCGTTTTGATGAAAACGACACGTGTCGTCTCCTCAAGCAGCGACTTTCTGACCTAGATCCT…
>Braole_Parent=BolC4t25984H;Name=BolC4t25984H
CGGCGGATTCTAATCAGGTCCCGGAACCATCCTCCCCGCTCGTCCACCGAGCCCGATCCGTCCCTCAATACCCATCCCATCCTCCTCTCCCTTCGCCCAATCCAACCTCCCTCCGCTTCCGCCGTCTTCCTCCTCCACCTCCCAGAAAGTGCCGCCCGTTCCAGCCCCTCCATCGCTTCCGCCGGCAGGGAGGATCCTGGGAAGGCGCTTAGGGATTGGGATCTGTGGGGACCGTTTTTCTTCATTGTGTTCTTGGGGCTTATGCTTTCATGGTCTCCCTCCGTCAAAAAGTCTAAGGCATCCCTAGACAGTGCACTGCTGTTAGCTTTTGATTTAATACAGAGAACTGATTCACACTTGATGTCTATGATCCAATATGCGATTAACCATATTGTAAAG…
>Braole_Parent=BolC5t33018H;Name=BolC5t33018H
CGACGAGATCGAGAACAAGATGAACGGCGGATTCCAATCAGGTCCCGGAACCATCCTCCCCGCTCGTCCACCGAGCCCGATCCGTCCCTCAATACCCATCCCATCCTCCTCTCTCTTCGTCCAATCCAACCTCCCTGCGCTTCCGCCGTCCACCTCCCAGAAAGTGCCGCCCGTTCCAGCCCCTCCATCGCTTCCGCCGGCAGGGAGGATCCTGGGAAGGCGCTTAGGGATTGGGATCTGTGGGGACCGTTTTTCTTCATTGTGTTCTTGGGGCTTATGCTTTCATGGTCTCCCTCCGTCAAAAAGGCTAAGGCATCCCTAGACAGTGCACTGCTGTTAGCTTTTGATTTAACACAGAGAACTGATTCACAGTTGATGTCTATGATCCGATATGCGATT…
>Braole_Parent=BolC7t46233H;Name=BolC7t46233H
AGCCTAAGCCTTTTGGGCTACTGTCTATTCCCACCCGACGTTGGAGCTGTGATCTGCATGTTGAAGGACAATGTGATACTCAAAATGATCGTTGCCTGGAGCTCTTGGGCTGCTTATCCTTTCATGAGCGCTGCAAAGAAAAGCTCTCGCACTTTATCCTCTCTTCCTCATGCATGTCTCTGTCGGCTTCTTGATCATTGCCATTGA
>Braole_Parent=BolC9t56073H;Name=BolC9t56073H
ATGAACGGCGGATTCCAATCAGGTCCTGGAACCATCCTCCCCGCTCATCCACCGAGCTCGATCCGTCCCTCAATACCCATCCCATCCTCCTCTCCATTCGTCCAATCCAACCTCCCTCCGCTTCCGCCGTCTTCCTCCTCCACCTCCCAGAAAGTGCCGCCCGTTCCAGCCCCTCCATCGCTTCTGCCGGCAGTTAACTTCAGCATCTCGAAAGTTCGAGGACGATCGGTGGGAGCGGGTTCTCCGCCGAACACGTTGACGGAGCCGGTGTGGGATACTGTGAAGAAGAATCTGTCGATGATCGCGCTTAGGGATTGGGATCTGTGGGGACCGTTTTTCTTCATTGTGTTCTTGGGGCTTATGCTTTCATGGTCTCCCTCTGTCAAAAAGTCCGAAGTG…
>Brajun_BjuA002897
ATGAAGAAAAGCGGTCCTCACAGATCCCAATCCCTAAGCGCCTTCACAGAACACAAACTCCCTATTCGGATTCAGAAACACCACCAGCTTCAGATTACTCACGATCATCGACAGATCCCTCTTCACAGTATCACACACCGGCTCCGTCAACGTGTTCGGCGGAGACCCGAACCCGCTCCCACCGATCGTCCTCGAACTTTCGAGATGCCGAAGTTACCTGCCGGCGGAAGCGATGGAGGGGCTGGAACGGGCGGCACTTTCTGGGAGGTGGAGGAGGAAGACGGCGGAAGCGGAGGGAGGCTGGATTGGACGAAGGGAGAGGAGGATGGGATGGGTACTGAGGGACGGATCGGGCTCGGTGGAAGAGCGGGGAGGATGGTTCCGGGACCTGATTGGAAT…
>Brajun_BjuA003580
ATGTCGCACAACGATACAGTTCCGCTATACCAATCCTCCCAATCAGACATCGACGAGATCGAGAACATGATGAACGGCGGTTTCCAATCGGGACCCGGATCAGTCCTCCCGGCCCGCCCGCCGAGCCCGATCCGTCCCTCGATACCGGTGACATCCTCCCCCTTCGTCCAATCCAACCTCCCGCCGCTGGCCCCTGCGCAGAAGGTGACGCCTGTTCCCGTCCCTCCGGCGGGAAGCGGGGGCTCGGAAGGAGGGAAGGCGAGCGGGTTCGGGTCTCCGGCGAACACGTTGACGGAGCCGGTGTGGGATACGGTGAAGAGAGATCTGGGGAGGATAGGGAGTAACCTGAAGCTGGTGGTGTTTCCGAATCCGAACAGGGAGGATCCGGGGAAGGCGCTT…
>Brajun_BjuA042415
ATGTCGCACAACGATACGACGCCGCTTTACCAGTCATCTCAGTCGGACATCGAAGAGATCAAGAACATGATCAACAACGACGGAAGCGTCCTCCCTGCTCGTCCCTCAATCCCCGTTACGTCCTCACCGTTCGTTCAATCCAACCTCCCACCGCCGTCTTCCTCTTCGACTCAGAAGGTGACACCTGTTCCAGTGCCTCCGTCGCTCAGTTTCCAGTCCGAAGTGTTTGCCGTGGCATTTGCACTACTTGCAGCCGGAGCAGTGATCCTCTCACTAAATGTCCTGCTCCTGGGAGGACATATAATCTTCTTCCAAAGCCTAAGCCTTTTGGGCTACTGTCTATTCCCACTGGACGTTGGAGCAGTGATCTGCATGTTGAAGGACAATGTGATACTCAAA…
>Brajun_BjuA046640
ATGTCTCACAACGATACGATTCCGCTCTACCAATCGTCCCAATCAGACATCGACGAGATCGAGAACATGATGAACGCCGGATTCCAATCGGGTCCCGGATCCGTCCTCCCCGCTCGTCCGCCGAGCCCGATCCGTCCCTCGATCCCCGTCTCGTCCTCTCCCTTCGTCCAATCCAACCTCCCTCCGCTTCCGCCGTCTTCCTCCTCCGCCGCCCAGAAAGTGACGCCCGTCCCAGCCCCTCCGTCGCTTCCGCCGGCAGTTAACTTCGGCAGCTCGGAAGGCTCGAAGACGACGGGATTCGGGTCTCCGCCGAACACGTTGACGGAGCCGGTGTGGGATACGGTGAAGAGGGATCTGTCGAGGATCGTGAGTAACCTGAAGCTGGTGGTGTTTCCGAAT…
>Brajun_BjuB040631
ATGTCGCACAACGACACAGTTCCGCTCTACCAATCCTCCCAATCAGACATCGACGAGATCGAGAACATGATGAGCCAAGGTTTCCAATCAGGTCCCGGAACCGTCCTCCCCGCTCGTCCCCCGAGCCCGATCCGTCCCTCGATCCCCGTCACATCCTCTCCCTTCGTCCAATCCAACCTCCCCCCGCTTCCTCCGCCGTCGCAGAAGGTGATGCCTGCTCCCGTCCCCCCTCCGCCGGCGGTTAACTTCGGCGGCAGCTCGGAGGGTGGTAAGACGATCGGAGGAAGCGGGTTCGGGTCTCCGCCGAACACGCTGACGGAGCCGGTGTGGGATACGGTGAAGAGGGATCTGTCGAGGATCGTGAGTAATCTGAAGCTGGTGGTGTTTCCGAATCCGAAT…
>Brajun_BjuO011647
ATGGTTTACTGTATTGACGAACAAACTGGATTAGAAAATGTGAAATCAATAGGGCTAAACAAGTCCGAAGTATTTGCGGTGGTATTTGCAGTACTTGCAGCTGGGGCAGTGATCCTCACACTAAATGTGCTGCTCCTGGGAGGACATATAATCTTCTTCCAAAGCCTAAGCCTTTTGGGCTACTGTCTATTCCCACTGGACGTCGGAGCAGTGATCTGCATGTTGAAGGACAATGTGATACTCAAAATGATAGTTGTGTGTGTGACTCTTGCCTGGAGCTCTTGGGCCGCTTATCCTTTCATGAGCGCCGCCGTGAACCCAAGGAGGAAAGCTCTCGCACTTTATCCTGTCTTCCTCATGTATGTCTCTGCTGGCTTCTTGATCATTGCCATTGAT
>Branig_CM004492.1_FGenesh10897.1
ATGTCACACAACGACACAGTTCCGCTCTACCAATCCTCCCAATCAGACATCGACGAGATCGAGAACATGATGAGCCAAGGTTTCCAATCAGGTCCCGGAACCGTCCTCCCCGCTCGTCCCCCGAGCCCGATCCGTCCCTCGATCCCCGTCACCTCCTCTCCCTTCGTCCAATCCAACCTCCCCCCGCTTCCTCCGCCGTCGCAGAAGGTGATGCCTGCTCCCGTCCCCCCTCCGTCGCTTCCGCCGTCGGTTAACTTCGGCGGAAGCTCGGAGGGTGGTAAGACGATCGGAGGAAGCGGGTTCGGGTCTCCGCCGAACACGCTGACGGAGCCGGTGTGGGATACGGTGAAGAGGGATCTGTCGAGGATCGTGAGTAATCTGAAGCTGGTGGTGTTTCCG…
>Branig_CM004493.1_FGenesh9810.1
ATGAAAACACTCCAATCCCGAAGCGCCATCCTAGGATCCTCCATATTCGGATTCGGAAGCACCACCAGCTTCAGATTACTCACGATCCGCCACAGATCCCTTTTCACTGTATCCCAAACCGTCTCCGTCAACGTGTTCGGCGGAGACCCGAACCCGCTCCCCCCTATTGTCTTCGAACCTTCGAGCTGCCGACGTTACCTGCCGGCGGAAGCGGACGGAGGGGCTGGAACAGGCGTCACTTTCTGGGAGGTGGAGGAGGAAGACGGCGAAAGAGGAGGGAGGTTGGATTGGAAGAAGGGAAAGGAGGATGAGATGCGTATTGAGGAACGGATCAGGCTCGATGGACGTGCGGGGAGGACGGTTCCGGGACCTGATTGGAATCCGCTGTTCATCATGTTC…
>Brarap_Parent=BraA01t00734Z;Name=BraA01t00734Z
ATGTCGCACAACGATACAGTTCCGCTATACCAATCCTCCCAATCAGACATCGACGAGATCGAAAACATGATGAACGGCGGCTTCCAATCGGGTCCCGGGTCAGTCCTCCCGGCCCGTCCGGCGAGCCCGATCCGTCCCTCGATACCGGTGACATCCTCCCCCTTCGTCCAATCCAACCTCCCGCCGCTGGCCCCTGCGCAGAAGGTGACGCCAGTTCCCGTCCCGCCGGCGGGAAGCGGGGGCTCGGAAGGAGGGAAGGCGATGGGGTTCGGGTCTCCGGCGAACACGTTGACGGAGCCGGTGTGGGATACGGTGAGGAGGGATCTGGGGAGGATAGTGAGTAATCTGAAGCTGGTGGTGTTTCCGAATCCGAACAGGGAGGATCCGGGGAAGGCGCTT…
>Brarap_Parent=BraA03t15022Z;Name=BraA03t15022Z
ATGATCAACAACGACGGAAGCGTCCTCCTTGGGATCTTCGGGGGCCCTTTCTTCTTCTTCATTGTCTTCTTGGGTCTTACTCTTTCTTGGTCTGCTTCTGTTAAGAAGGGAGGACATATAGTCTTCTTCCTTTTGGGCTACTGTCTCTTCCCACTGGACGTTGGAGCCGTGATGCTGAAGGACAATGTGATACTCAAAATGATCGTTAGCTCTTGGGCCGCTTATCCTTTCATGAGCGCTGCAGTGAACCCGAGGAGAAAAGCTCTTACACTTTACCCTGTCTTCCTCATGTATGTCTCTCTTGGCTTCTTGATCATTGCCATTGATTGA
>Brarap_Parent=BraA06t25129Z;Name=BraA06t25129Z
AATAACGAGCCCGATCCGTCCCTCAATACCCGTCTCATCCTACTCTCCTTTTGTCCAATCCAACCTCCCTTCGCTTCTGGCGTCTTCCTCCTCCACCTCCCAGAAAGTGCCGCCCGTTCCAGCCCCTCTGTCGCTTCCGCCGGCAGAGAGGATCTTGGGAAGGCGTTTAGGGATTGGGATCCGTGGGGACCGTTTTTCTTCATTGTGTTCTTGGGGCTTACGCTTTCTTGGTCTGCCTCCGTCAAGAAGGCTAAGGCATCCCTAGACAGTGCACTGCTGTTAGTTTTTGATTTAACACAGAACTGA
>Brarap_Parent=BraA08t33893Z;Name=BraA08t33893Z
ATGTCTCACAACGATACGATTCCGCTCTACCAATCGTCCCAATCAGACATCGACGAGATCGAGAACATGATGAACGCCGGATTCCAATCGGGTCCCGGAACCGTCCTCCCCGCTCGCCCGCCGAGCCCGATCCGTCCCTCGATCCCCGTCTCGTCCTCCCCCTTCGTCCAATCCAACCTCCCTCCGCTTCCGCCGTCTTCCTCCTCCGCCGCCCAGAAAGCGACGCCCGTCCCAGCCCCTCCGTCGCTTCCGCCGGCAGTTAACTTCGGCAGCTCGGAAGGCTCGAAGACAACGGGATTCGGGTCTCCGCCGAACACGTTGACGGAGCCGGTGTGGGATACGGTGAAGAGGGATCTGTCGAGGATCGTGAGTAACCTGAAGCTGGTGGTGTTTCCGAAT…
>Branap_BnaCnng25430D
ATGAGAATCATATATATAGGGTCCCGGAACCATCCTCCCCGCTCGTCCACCGAGCCCGATCCGTCCCTCAATACCCATCCCATCCTCCTCTCCCTTCGCCCAATCCAACCTCCCTCCGCTTCCGCCGTCTTCCTCCTCCACCTCCCAGAAAGTGCCGCCCGTTCCAGCCCCTCCATCGCTTCCGCCGGCAGGGAGGATCCTGGGAAGGCGCTTAGGGATTGGGATCTGTGGGGACCGTTTTTCTTCATTGTGTTCTTGGGGCTTATGCTTTCATGGTCTCCCTCCGTCAAAAAGTCTAAGGCATCCCTAGACAGTGCACTGCTGTTAGCTTTTGATTTAATACAGAGAACTGATTCACACTTGATGTCTATGATCCAATATGCGATTAACCATATTGTA…
>Branap_BnaA01g06760D
ATGTCGCACAACGATACAGTTCCGCTATACCAATCGTCCCAATCAGACATCGACGAGATCGAGAACATGATGAACGGCGGTTTCCAATCGGGTCCCGGGTCAGTCCTCCCGGCCCGCCCGCCGAGCCCGATCCGTCCCTCGATACCGGTGACATCCTCCCCCTTCGTCCAATCCAACCTCCCGCCGCTGGCCCCTGCGCAGAAGGTGACGCCAGTTCCCGTCCCTCCGGCGGGAAGCGGGGGCTCGGAAGGTGGGAAGGCGAGCGGGTTCGGGTCTCCGGCGAACACGTTGACGGAGCCGGTGTGGGAGACGGTGAAGAGGGATGTGGGGAGGATAGGGAGTAACCTGAAGCTGGTGGTGTTTCCGAATCCGAACAGGGAGGATCCGGGGAAGGCGCTT…
>Branap_BnaA03g50040D
ATGGGATTCGGATCTCCGGCGAACACGTTGACGGAGCCGGTGTGGGATACAGTGAAGAGAGATGTGTGGAGGATATTAGTGAATAATCTGAAGCTGGTGCTTCTGTTAAAAAGATCCAAATCTGATCCGAACCGAAGTATTCGGATACTTATATATTTAATTATATTTAGATTTAACATTCTTTCTCTGTTTATTGCATTTTCTTCTGTTCTCATTCTTTCTCTCTGTAGTTTCCAGTCCGAAGTGTTTGCCGTGGCATTTGCACTACTTGCAGCCGGAGCAGTGATCCTCACACTAAATGTCCTGCTCCTGGGAGGACATATAATCTTCTTCCAAAGCCTAAGCCTTTTGGGCTACTGTCTATTCCCACTGGACGTTGGAGCAGTGATCTGCATGTTG…
>Branap_BnaAnng33240D
ATGTCTCACAACGATACGATTCCGCTCTACCAATCGTCCCAATCAGACATCGACGAGATCGAGCACATGATGAACGACGGATTCCAATCGGGTCCCGGAACCGTCCTCCCCGCTCGCCCGCCGAGCCCGATCCGTCCCTCGATCCCCGTCTCGTCCTCTCCCTTCGTCCAATCCAACCTCCCTCCGCTTCCGCCGTCTTCCTCCTCCGCCGCCCAGAAAGTGACGCCCGTCCCAGCCCCTCCGTCGCTTCCGCCGGCAGTTAACTTCGGCAGCTCGGAAGGCTCGAAGACAGTGGGGTTCGGGTCTCCGCCGAACACGTTGACGGAGCCGGTGTGGGATACGGTGAAGAGGGATCTGTCGAGGATCGTGAGTAACCTGAAGCTGGTGGTGTTTCCGAAT…
>Branap_BnaC07g42480D
ATGGGATTCGGATCTCCGGCGAACACGCAGCGCTTAGGGATTGGGATCTTTGGGGGCCCTTTCTTCTTCATTGTCTTCTTCGGTCTTACTCTTTCTTGGTCTGCTTCGGTTAAGAATTTCCAGTCCGAAGTATTTGCCGTGGCATTTGCACTACTTGCAGCCGGAGCAGTGATCCTCACACTAAATGTCCTGCTCCTGGGAGGACATATAATCTTCTTCCAAAGCCTAAGCCTTTTGGGCTACTGTCTATTCCCACCCGACGTTGGAGCTGTGATCTGCATAAAAGCTCTCGCACTTTATCCTCTCTTCCTCATGCATGTCTCTGTCGGCTTCTTGATCATTGCCATTGATTGA
>Branap_BnaC03g67990D
ATGTCTCACAACGATACGATTCCGCTCTACCAATCGTCCCAATCAGACATCGACGAGATCGAGAACATGATGAACGGCGGACTCCAATCGGGTCCCGGAACCGTCCTCCCCGCGCGTCCGCCGAGCCCGATCCGTCCCTCGATCCCCGTCTCATCCTCTCCCTTCGTCCAATCCAACCTCCCTCCGCTTCCGCCGTCTTCATCCTCCGTCCCAGCCCCTCCGTCGCTTCCGCCGGCGGTTAAATTCGGCAGCTCGGAAGGCTCGAAGACGATCGGATTCGGGTCTCCGCCGAACACGTTGACGGAGCCGGTGTGGGACACGGTGAAGCGGGATCTGTCGAGGATCGTGAGTAACCTGAAGCTGGTGGTGTTTCCGAATCCGAATCGGGAGGATCCTGGG…
>Branap_BnaC05g31190D
ATGATCGTGAGTAATCTGAAGCTGGTGGTGTTTCCGAATCCGAATAGGGAGGATCCTGGGAAGGCGCTTAGGGATTGGGATCTGTGGGGACCGTTTTTCTTCATTGTGTTCTTGGGGCTTATGCTTTCATGGTCTCCCTCCGTCAAAAAGGCTAAGACATCCCTAGACAGTGCACTGCTGTTAGCTTTTGATTTAACACACAGAACTGATTCACAGTTGATGTCTATGATCCGATATGCGATTAACCATATTGTAAAGTTTACCATTAAATGTTGTGGTCACTCCGAAGTGTTTGCTGTGGCCTTTGCGCTACTTGCAGCTGTAGCAGTGATCCTCAACACTAAATGTATCTTCTCCAAGGCGTCAACCGTCATACAAGCCACTGTGTACAAACATCTT…
>Branap_BnaC01g08140D
ATGTCGCACAACGACACAGTTCCGCTATACCAATCGTCCCAGTCAGACATCGACGAGATCGAGAACATGATGAGCGAAGGTTTCCAATCGGGACCCGGGTCAGTCCTCCCCGCCCGTCCGCCGAGCCCGATCCGTCCATCGATACCCGTCACATCCTCCCCCTTGGTCCAATCCAACCTCCCGCCGCTTCCCCCTGCCCAGAAGGTGACGCCTGTTCCCGTCCCTCCGTCGGGAAGCAGCGGCTCGGAAGGTGGGAAGGCGATCGGGTTCGGGTCTCCGCCGAACACGTTGACGGAGCCGGTGTGGGATACGGTGAAGAGGGATCTGGCGAGGATAGTGAGTAATCTGAAGCTGGTGGTGTTTCCGAATCCGAATAGGGAGGATCCGGGGAAGGCGCTT…
>Boestr_Bostr.7867s0878.1
ATGTCGCACAACGATACGGTTCCGCTTTATCAATCATCTCAATCAGACATCGACGAGATTGAGAATATGATGAGCGGTAATTTCCAATCAGGTCCCGGAACCGTGCTCCCAGCTCGTCCACCGAGCCCGATCCGTCCATCCATTCCCGTTTCATCCTCACCGTTCGTTCAATCCAACCTTCCACCGCTTCCACCGTCTTCTTCCTCTACTCAGAAGGTGATGCCTGTTCCAGCTCCTCCGCCGCTTCCGTCAGCAGGTAACTCTGAAGGTTCCAAGACTATCGGAGGGAGTGGATTCGGATCTCCGCCGAATACATTGACTGAGCCTGTTTGGGATACTGTAAAGCGAGATCTGTCGCGTATCGTGAGTAATTTGAAGCTTGTGGTGTTTCCGAATCCG…
>Capbur_MPGU01000180.1_FGenesh518.1
ATGTCGCACAATGATACGATTCCGCTTTACCAATCATCTCAATCAGACATCGACGAGATTGAGAATATGATGAGCGATAACTTTCAATCAGGTCCGGGGACCGTGCTCCCGGCTCGTCCGCCAAGCCCTGCCCGTCCGTCTATTCCCGTTTCATCCTCACCTTTCGTTCAATCTAACCTCCCACCGCTTCCACCGTCATCTACTTCCACTCAGAAGGTGATGCCTGTTCCAGCTCCTCCGCCGCTTCCTTCAGCAGGTAACTCTGAAGGTTCCAAGACTATCGGAGGGAGTGGGTTCGGATCTCCTCCGAATACATTGACGGAGCCTGTTTGGGATACTGTAAAGCGAGATCTGTCACGGATCGTGAGTAATTTGAAGCTTGTGGTGTTTCCGAATCCG…
>Capbur_MPGU01000359.1_FGenesh55.1
ATGTCGCACAATGATACGATTCCGCTTTACCAATCATCTCAATCAGACATCGACGAGATTGAGAATATGATGAGCGATAACTTTCAATCAGGTCCCGGGACCGTGCTCCCGGCTCGTCCGCCAAGCCCTGCCCGTCCGTCCATTCCCGTTTCATCCTCACCTTTCGTTCAATCTAACCTCCCACCGCTTCCACCGTCATCTACTTCCACTCAGAAGGTGATGCCTGTTCCAGCTCCTCCGCCGCTTCCTTCAGCAGGTAACTCTGAAGGTTCCAAGACTATCGGAGGGAGTGGGTTCGGATCTCCTCCGAATACATTGACGGAGCCTGTTTGGGATACTGTAAAGCGAGATCTGTCACGGATCGTGAGTAACTTGAAGCTTGTGGTGTTTCCGAATCCG…
>Carhir_CARHR238170.1
ATGTCGCACAACGATACGATTCCGCTTTATCAATCATCTCAATCAGACATAGACGAGATTGAGAATATGATGAACAACAATACTTTTCAATCAGGTCCCGGAACCGTCCTTCCCGCTCAACCACCGAGTCCGATCCGTCCGTCCATTCCCGTTTCATCCTCACCGTTCGTTCAATCCAACCTTGCTCCGATCCCACCGTCTTCAGCTCAGAAGGTGACGCCTGTTCCAATGCCTCCGCCGCTTCCTCCGTCAGGTAACTCCAGCAGCTCCGAAGTTTCGAAGACAATTGGAGGGAGTGGATTTGGATCTCCGCCTAATACATTGACGGAGCCTGTTTGGGATACTGTGAAGCGAGATCTGTCGAGGATTGTGAGTAATTTGAAGCTTGTGGTTTTTCCG…
>Capgra_Cagra.1744s0003.1
ATGTCGCACAATGATACGATTCCGCTTTACCAATCATCTCAATCAGACATCGACGAGATTGAGAATATGATGAGCGATAACTTTCAATCAGGTCCGGGAACCGTGCTCCCGGCTCGTCCGCCAAGCCCTGCCCGTCCGTCCATTCCCGTTTCATCCTCACCTTTCGTTCAATCTAACCTCCCACCGCTTCCACCGTCATCTACTTCCACTCAGAAGGTGATGCCTGTTCCAGCTCCTCCGCCGCTTCCTTCAGCAGGTAACTCTGAAGGTTCCAAGACTATCGGAGGGAGTGGGTTCGGATCTCCTCCGAATACATTGACGGAGCCTGTTTGGGATACTGTAAAGCGAGATCTATCACGGATCGTGAGTAATTTGAAGCTTGTGGTGTTTCCGAATCCG…
>Capcru_Carub.0007s1035.1
ATGTCGCACAATGATACGATTCCGCTTTACCAATCATCTCAATCAGACATCGACGAGATTGAGAATATGATGAGCGATAACTTTCAATCAGGTCCGGGAACCGTGCTCCCGGCTCGTCCGCCAAGCCCTGCCCGTCCGTCCATTCCCGTTTCATCCTCACCTTTCGTTCAATCTAACCTCCCACCGCTTCCACCGTCATCTACTTCCACTCAGAAGGTGATGCCTGTTCCAGCTCCTCCGCCGCTTCCTTCAGCAGGTAACTCTGAAGGTTCCAAGACTATCGGAGGGAGTGGGTTCGGATCTCCTCCGAATACATTGACGGAGCCTGTTTGGGATACTGTAAAGCGAGATCTGTCACGGATCGTGAGTAATTTGAAGCTTGTGGTGTTTCCGAATCCG…
>Camsat_Csa10g012240.1
ATGTCGCACAATGATACGATTCCGCTTTATCAATCATCTCAATCAGACATCGACGAGATTGAGAATATGATGAGCGATAATTTCCAATCAGGTCCCGGGACCGTACTCCCAGCTCGTCCACCGAGCCCGATCCGTCCGTCCATTCCCGTTTCATCCTCACCGTTCGTTCAATCCAACCTCCCACCGCTTCCACCGTCTTCTTCTTCTGCTTCTTCCACTCAGAAGGTGATGCCTGTTCCAGCTCCTCCGCCGCTTCCTTCAGCAGCTGAAGGTTCGAAGACTATCGGAGGGAGTGGATTCGGATCTCCTCCTAATACATTGACGGAGCCTGTTTGGGATACTGTAAAGCGAGATCTGTCACGGATCGTGAGTAATTTGAAGCTTGTGGTGTTTCCCAAT…
>Camsat_Csa11g013150.1
ATGTCGCACAACGATACGATTCCGCTTTATCAATCATCTCAATCAGACATCGACGAGATTGAGAATATGATGAGCGATAATTTCCAATCAGGTCCCGGGACCGTGCTCCCAGCTCGTCCGCCGAGCCCGATCCGTCCGTCCATTCCCGTTTCATCCTCACCGTTCGTTCAATCCAACCTCCCACCGCTTCCACCGTCTTCTTCTGCTTCTTCCACTCAGAAGGTGATGCCTGTTCCAGCTCCTCCGCCGCTTCCTTCAGCAGGTGAAGGTTCCAAGACTATCGGAGGGAGTGGGTTCGGATCTCCTCCGAATACATTGACGGAGCCTGTTTGGGATACTGTAAAGCGAGATCTGTCACGGATCGTTAGTAATTTGAAGCTTGTGGTGTTTCCGAATCCG…
>Camsat_Csa12g016900.1
ATGTCGCACAACGATACGATTCCGCTTTATCAATCATCTCAATCAGACATCGACGAGATTGAGAATATGATGAGCGATAATTTCCAATCAGGTCCCGGAACCGTGCTCCCAGCTCGTCCACCGAGTCCGATCCGTCCGTCCATTCCCGTTTCATCCTCACCGTTCGTTCAATCCAACCTACCACCGCTTCCACCGTCGTCTTCTTCAGTTTCCACTCAGAAGGTGATGCCTGCTCCAGCTCCTCCGCCGCTTCCTTCAGCTGCTGAAGGTTCGAAGAGTATTGGAGGGAGTGGGTTCGGATCTCCTCCCAATACATTGACGGAGCCTGTTTGGGATACTGTAAAGCGAGATCTGTCACGGATCGTGAGTAATTTGAAGCTTGTTGTGTTTCCCAATCCG…
>Dipstr_Distr.0010s0256.1
ATGTCGCACGGCGATACGATTCCGCTTCATCCGTCTTCTCAGTCGGATATCGACGAGATTGAGAATATGATCAACGACAGTTTTCAATCGGGTCCCGGAACCGTCCTTCCAGCTCGGCCGCCTAGCCCGATCCGTCCATCCATTCCCGTTTCTTCATCTCCTTTCGTCCAATCAAACCTTCCACCGCTTCCGCCTTCTTCTTCCTCTGCTCAGAAGGTGATGCCTGTTCCAGCTCCTCCGTCGTTTCCGTCGTCAGCTAACTTTAGCAGCTCCGAAGGTCCCAAGACCATCGGAGGGAGCGGGTTCGGACCTCCGCCAAATACATTGACGGAGCCTGTGTGGGACACTGTAAAACGAGATCTGTCTCGGATCGTGAGTAATCTGAAGCTTGTGGTTTTT…
>Eutesa_Thhalv10025913m
ATGTCGCACAACGATACCACACCACTTTATCAATCGTCTCAGTCGGACATCGACGAGATTGAGAATATGATGAACGACGGATTTCAATCCGGTCCCGGAACCGTCCTTCCTGCTCGTCCGCCGAGTCCGATCCGTCCCTCCATTCCCGTTTCATCCTCGCCGTTTGTTCAATCGAACCTTCCACCGCTCCCGCCGTCTTCCTCTTCCTCCTCCTCAGCTCAGAAGGTGACGCCTGTCCCAGTCCCTCCGTCTCTTCCTCCGGCGGGAAATTTCGGCAGCTCCGAAGGTCCCAAGACCATCGGAGGGAGCGGATTCGGATCTCCGCCGAACACATTGACGGAGCCTGTGTGGGATACTGTGAAGCGAGATCTGTCGCGGATCGTGAGTAATCTGAAGCTC…
>Eruves_Eruve.7511s0003.1
ATGCCGGTGGAGTGGGAGCCTCATGCTCAAACATGGATCGGTTTGCCTGAAGTATTTGCCGTGGCATTTGCACTACTTGCAGCTGGAGCAGTGATCCTCACACTAAATGTGCTGCTCCTGGGAGGACATATAATATTTTTCCAAAGCCTAAGCCTTTTGGGTTACTGTCTGTTTCCACTGGATGTTGGAGCAGTGATCTGCATGTTGAAAGACAATGTGATTCTCAAAATGATAGTTGTGTGTGACTCTTGCCTGGAGCTCTTGGGCCGCTTATCCTTTCATGAACGCTGCAGTGAACCCAAGAAGGAAAGCTCTTACACTTTACCATGTCTTCCTCATGTATGTCTCTGTCGGCTTCTTGATCATTGCCATTGA
>Eruves_Eruve.1665s0006.1
ATGTCTCACAACGACACGATCCCACTCTACCAATCTTCCCAATCAGACATCGACGAGATCGAGAACATGATGAGCAACAACGGCTTCCAATCAAATCCCGGATCCGTCCTCCCCGCTCGCCCCCCAAGCCCGACCCGCCCCTCCATACCCGTCTCCTCCTCCTCTCCCTTCGTCCAATCCAACCTCCCGCCGCTTCCTCCGCCGTCCTCCGCCGCCGCGCCGAAAGTGACGCCTGTCCCAGCCCCTCCTCCGCCGTCGTCGGGGTTCGGGTCGGCGCCGAACACGTTGACGGAGCCGGTGTGGGATACGGTGAAGAGGGATCTGGCGAGGATAGTGAGTAATCTGAAGCTGGTGGTGTTTCCGAATCCCAATAGGGAGGATCCTGGCAAGGCACTTAGG…
>Eruves_Eruve.0159s0013.1
ATGTCTCACAACGATACAATCCCGCTTTACCAATCCTCCCAATCAGATATCGACGAGATCGAAAACATGATGAACCAAGAATTCCAATCAGGACCCGGAACAGTCCTCCCCGCCCGTCCACCAAGCCCGATCCGTCCCTCAATCCCCGTCACATCCTCCCCCTTCGTCCAATCCAACCTCCCACCTCTCCCTCCTCCCTCCTCCTCTCAGAAAGTGACGTCTGTTCCCGTCCCTCCGTCTCTTCCTCCGCCTGCTTCAGGTAACTTCGGGGGAGGATCCGATGGGAAGACGATCGCGGGAAGCGGGTTCGGGCCGCCGCCGAACACGTTGACGGAGCCGGTGTGGGATACGGTGAAGAGGGATCTGGCGAGGATAGTGAGTAATTTGAAGCTGGTTGTG…
>Eruves_Eruve.0360s0044.1
ATGTCTCACAACGACACGATTCCGCTTTACCAATCCTCGCAATCAGACATAGACGAGATCGAAAACATGATGAACCAAGAATTCCAATCAGGACCCGGAACAGTCCTCCCCGCCCGTCCACCAAGCCCGATCCGTCCCTCAATCCCCGTCACTTCCTCCCCCTTCGTCCAATCCAACCTCCCACCTCTCCCTCCTCCCTCCTCCTCCTCTCAGAAGGTGACGTCTGTCCCCGTACCTCCGTCTCTTCCTCCGCCTTCTTCAGGTAACTTCGGGGGAGGATCCGATGGGAAGACGATCGGGGGAAGCGGGTTCGGGCCGCCGCCGAACACGTTGACGGAGCCGGTGTGGGATACGGTGAAGAGGGATCTGGCGAGGATAGTGAGTAATTTGAAGCTGGTG…
>Isatin_Isati.1429s0010.1
ATGTCGCACAACGACACAGTTCCGCTTTATCAGTCGTCGCAGTCTGACATCGACGAGATCGAGAATATGATGAACGACGGGTTTCAATCAGGTCCAGGGACCGTCCTTCCAGCTCGTCCGCCGAGCCCGATCCGTCCCTCCATTCCCGTGACATCCTCGCCGTTCGTTCAATCCAACCTGCCACCGCTTCCGCCGTCTTCCTCCTCCTCCTCCTCCTCCACCCAGAAGGTGATGCCTGTTCCTGTCCCTCCGTCGCTCCCGCCGGCAGGTAATTTCAGCAGCTCCGAAGGCTCGAAGACCATCGGAGGAAGCGGGTTCGGATCTCCGCCGAACACGCTGACGGAGCCTGTGTGGGACACTGTGAAGCGAGATCTGTCGCGGATCGTGAGTAATCTGAAG…
>Isatin_Isati.1429s0011.1
ATGTCGCACAACGACACAGTTCCGCTTTATCAGTCGTCTCAGTCTGACATCGACGAGATCGAGAATATGATGAACGACGGGTTTCAATCAGGTCCAGGGACCGTCCTCCCCGCTCGTCCGCCGAGCCCGATCCGTCCCTCCATTCCCGTTACATCCTCGCCGTTCGTTCAATCCAACCTCCCACCGCTTCCGCCGTCTTCCTCCTCCTCCTCCACCCAGAAGGTGATGCCTGTTCCTGCCCCTCCGTCGCTTCCGCCGGCAGGTAATTTCAGCAGCTCCGAAGGCTCGAAGACCATCGGAGGAAGCGGGTTCGGATCTCCGCCGAACACGCTGACGGAGCCTGTGTGGGACACTGTGAAGCGAGATCTGTCGCGGATCGTGAGTAATCTGAAGCTCGTG…
>Isatin_Isati.2953s0007.1
ATGTCGCACAACGACACAGTTCCACTTTATCAGTCGTCTCAGTCTGACATCGACGAGATCGAGAATATGATGAACGACGGGTTTCAATCAGGTCCAGGGACCGTCCTCCCCGCTCGTCCGCCGAGCCCGATCCGTCCCTCAATACCCGTGACATCCTCGCCGTTCGTTCAATCCAACCTCCCACCGCTTCCGCCGTCTTCCTCCTCCTCCTCCTCCACCCAGAAGGTGATGCCTGTTCCTGTCCCTCCGTCGCTCCCGCCGGCAGGTAATTTCAGCAGCTCCGAAGGCTCGAAGACCATCGGAGGAAGCGGGTTCGGATCTCCGCCGAACACACTGACGGAGCCTGTGTGGGACACTGTGAAGCGAGATCTGTCGCGGATCGTGAGTAATCTGAAGCTT…
>Isatin_Isati.4887s0001.1
ATGTCGCACAACGACACAGTTCCGCTTTATCAGTCGTCTCAGTCTGACATCGACGAGATCGAGAATATGATGAACGACGGGTTTCAATCAGGTCCAGGGACCGTCCTTCCCGCTCGTCCGCCGAGCCCGATCCGTCCCTCCATTCCCGTTACATCCTCGCCGTTCGTTCAATCCAACCTCCCACCGCTTCCGCCGTCTTCCTCCTCCTCCTCCTCCACCCAGAAGGTGATGCCTGTTCCAGTCCCTCCGTCGCTCCCGCCGGCAGGTAATTTCAGCAGCTCCGAAGGCTCGAAGACCATCGGAGGAAGCGGGTTCGGATCTCCGCCGAACACGCTGACGGAGCCTGTGTGGGACACTGTGAAGCGAGATCTGTCGCGGATCGTGAGTAATCTGAAGCTC…
>Isatin_Isati.0819s0008.1
ATGTCGCACAACGACACAGTTCCGCTTTATCAGTCGTCTCAGTCTGACATCGACGAGATCGAGAATATGATGAACGACGGGTTTCAATCAGGTCCAGGGACCGTCCTTCCCGCTCGTCCGCCGAGCCCGATCCGTCCCTCAATACCCGTGACATCCTCGCCGTTCGTTCAATCCAACCTCCCACCGCTTCCGCCGTCTTCCTCCTCCTCCTCCTCCACCCAGAAGGTGATGCCTGTTCCTGTCCCTCCGTCGCTCCCGCCGGCAGGTAATTTCAGCAGCTCCGAAGGCTCGAAGACCATCGGAGGAAGCGGGTTCGGATCTCCGCCGAACACACTGACGGAGCCTGTGTGGGACACTGTGAAGCGAGATCTGTCGCGGATCGTGAGTAATCTGAAGCTT…
>Lunann_Luann.0045s0281.1
ATGTCGCATAACGATACGACTCCGCTTTACCCGTCGTCTCAGTCGGACATCGACGAGATTGAGAATATGATCAACGACAGTTTTCAATCAGGTCCCGGAACCGTCCTTCCTGCTCGGCCGCCGAGCCCGATCCGTCCATCCATACCCGTTTCGTCCTCGCCTTTCGTTCAATCTAACCTTCCACCGCTTCCACCTTCTTCCTCCTATTCCTCCACTCAGAAGGTGATGCCTGTTTCAGTCCCTCCGTCGGTAGGTAAATCCAGCAGCTCCGATGGTACCAAGACCATCGGAGGGAGCGGGTTCGGACCTCCGCCAAACACATTGACGGAGCCTGTATGGGATACTGTAAAGCGAGATCTGACGCGGATCGTGAGTAATCTGAAGCTTGTGGTTTTTCCG…
>Lunann_Luann.0003s0045.1
ATGTCGCACAACGATACGACTCCGCTTTATCAGTCGTCTCAGTCGGACATCGATGAGATTGAGAATATGATCAACGACAGTTTTCAATCAGGTCCGGGAACCGTCCTTCCTGCTCGGCCGCCGAGCCCGACCCGTCCGTCTATACCTGTTTCGTCCTCGCCGTTCGTCCAATCCAACCTTCCACCGCTTCCGCCATCTTCCTCCTCCGCTCAGAAAGTGATGCCTGTTCCAGTCCCTCCGTCCCTTCCGCCGGCAGGTAATTTCAGCAGCTCCGAAGGTCCTAAGTCCATCGGAGGGAGTGGATTTGGATCTCCGCCAAACACGTTGACGGAGCCTGTTTGGGATACTGTAAAGCGAGATCTGTCGCGGATCGTGAGTAATCTGAAGCTAGTGGTTTTT…
>Leaala_KE156714.1_FGenesh2.1
ATGTCGCACAACGATACGATTCCGCTTTATCAATCATCTCAATCAGACATCGATGAGATTGAGAATATGATGAACACCAACAGTTTTCAATCAGGTCCCGGAACTGTCCTTCCAGCTCAACCACCGAGTCCGATCCGTCCGTCAATTCCCGTTTCATCAACACCGTTTGTTCAGTCTAACCTTCCACCTCTTCCACCGTCTTCAGTTCAGAAAGCGATGCCTGTTCCAATGCCTCCGCCGCTTCCTCCTTCGGGATCGAATACAATTGGTGGGAGTGGATTCGGATCGCCGCCAAATACATTGACGGAGCCTGTTTGGGATACTGTAAAGCGAGATCTGTCAAGGATCGTGAGTAATTTGAAGCTTGTGGTTTTTCCAAATCCGAATAGGGAAGATCCT…
>Leaala_KE157112.1_FGenesh9.1
ATGTCGCACAACGATACGATTCCGCTTTATCAATCATCTCAATCAGATATCGACGAGATTGAGAATATGATGAACAACAACAGTTTTCAATCAGGCCCCGGAACTGTCCTTCCAGCTCAACCACCGAGCTCAACCCCTCCGTCAATTCCCGTTTCATCGTCACCGGAAGATCCAGGGAAGGCACTTAGGGATTGGGATCTATGGGGACCTTTCTTCTTTATTGTCTTCTTGGGACTTACTCTTTCCTGGTCTGCTTCTGTTAAAAAGTCAGAAGTATTTGCTGTGGCATTTGCACTACTTGCAGCTGGAGCAGTGATCCTCACACTAAATGTGCTTCTCCTGGGAGGACATATAATATTTTTCCAAAGCCTAAGTCTTCTAGGTTACTGTCTATTTCCA…
>Leaala_KE159410.1_FGenesh9.1
ATGTCGCACAACGATACGATTCCGCTTTATCAATCGTCTCAATCAGATATCGACGAGATTGAAAATATGATGAACAACAATAGTTTTCAATCAGGTCCTGGAACCGTCCTTCCTGCTCAACCACCGAGCCCGATCCGTGACATCCGTCCTTCTATTCCCGTTTCATCTTCACCATTCGTTCAATCAAACCTTCAACCATCATCAACTCAGAAGGTGATGCCTGTTCCAATACCTCCTCCGCTTCCTCCAACAGATAACTCTAAGACAATCGGAGGTAGTGGATTCGGATCTCCACCAAATACATTGACAGAACCTGTTTGGGATACTGTAAAACGAGATCTATCGAGGATCGTTAGTAATTTGAAGCTTGTGGTGTTTCCTAATCCGAATAGGGAAGAT…
>Lepsat_Lesat.0022s0033.1
ATGTCGCACAATGATACGGTTCCGTTATATCAATCATCTCAATCAGACATCGACGAGATCGAGAATATGATGAACGATGGTTTTCAATCTGGTCCCGGAACCGTTCTTCCTGCTCGACCGCCAAGCCCTAACCGTCCATCGATTCCCGTTTCGTCCGCACCGTTTGTTCAATCCCATCTTCCACCGCATCCGTCGTTGGCTTCTTCCACTCAAAAGGTGATGCCTGCTCCAGCACCTCCGCCGATTCCGTCGGTAGGTTACTCAAGTAGCTCCGATGGTCCTAAGACTATTGGAGGAAGCGGATTTGGATCTCCGCCTAACACATTGACGGAGCCTGTTTGGGATACTGTGAAGCGAGATCTGTCGCGGATTGTGAGTAATTTGAAGCTTGTGGTTTTT…
>Lepsat_Lesat.0117s0034.1
ATGTCGCACAATGATACGGTTCCGTTATATCAATCTTCTCAATCAGACATCGACGAGATCGAGAATATGATGAACGATGGCTTTCAATCTGGTCCCGGAACCGTTCTTCCTGCTCGACCGCCAAGTCCGAATCGTCCATCGATTCCCGTTTCTTCCACACCGTTCGTTCAATCCAATCTTCCACCGCATCCGCCGTCGGCTTCTTCCACTCAGAAGGTGATGCCTGCTCCAGCTCCTCCGCCGATTCCGTCGGTAGGTTACTCAAGCAGCTCCGAAGATCCTAAGACGATTGGAGGAAGCGGATTCGGATCTCCGCCAAACACATTGACGGAGCCTGTGTGGGATACTGTAAAGCGAGATCTATCGCGGATCGTGAGTAATTTGAAGCTTGTGGTTTTT…
>Noccae_OVBC01001339.1_FGenesh2.1
ATGTCGCACAACGACACGATTCCGCTTTATCAGTCGTCTCAGTCGGACATCGACGAGATTGAGAATATGATGAGCGACAGTTTCCAATCAGGTCCCGGAACCGTCCTCCCTGCTCGTCCTCCGAGCCCGATCCGTCCCTCCATACCGGTCTCTTCCTCACCGTTCGTCCAATCGAACCTTCCACCGCTTCCGCCGTCTTCCTCCTCCTCCGCTCAGAAGGTGATGCCTGTTCCAGTCCCTCCGTCGCTTCCGCCGGCAGGAAATTTCAGCAGCTCCGAAGGTCCGAAGACCATCGGAGGGAGCGGATTCGGACCTCCGCCAAACACATTGACGGAGCCTGTGTGGGATACTGTGAAGCGAGATCTGTCTCGGATCGTGAGTAATCTGAAGCTTGTGGTG…
>Noccae_OVBC01009691.1_FGenesh1.1
ATGCAATTTATACAGGGAGGACACATAATATTTTTCCAAAGCCTAAGCCTAAGCCTTTTGGGTTACTGTCTATTCCCACTGGACGTTGGAGCAGTGATCTGCATGTTGAAGGACAATGTGATACTCAAAATGATCGTTGTGTGCGTGACTCTTGCCTGGAGCTCTTGGGCCGCTTATCCGTTCATGAGCGCCGCCGTGAACCCGAGAAGAAAAGCTCTCGCACTTTACCCGGTCTTCCTCATGTATGTCTCTGTTGGCTTCTTGATCATTGCCATTGATTAA
>Rorisl_Roisl.0003s0035.1
ATGTCGCACAACGATACGATTCCGCTTTATCAATCATCTCAATCAGACATCGATGAGATTGAGAATATGATGAACAACAACAGTTTTCAATCAGGTCCCGGAACCGTCCTTCCCGCTCAACCACCGAGTCCGATCCGTCCATCAATCCCCGTTTCATCCTCACCGTTCGTTCAATCGAACCTTCCACCTCTTCCACCGTCCTCAGCTCAAAAGGTGACGCCTGTTCCAATGCCACCGCCGCTTCCTCCGTCAGGTAATTCCAGCAGCTCCGAAGGATCGAAGACAATCGGAGGTAGTGGATTTGGATCTCCGCCGAATACATTGACGGAGCCTGTTTGGGATACTGTAAAGCGAGATCTGTCGAGGATCGTGAGTAATTTGAAGCTTGTGGTGTTTCCA…
>Rapsat_Rsa1.0_00027.1_g00010.1
ATGTCTCACAACGATACGATTCCGCTTTACCAGTCGTCCCAATCAGACATCGACGAGATCGAGAACATGATGAACGGCGGCGGATTCCAATCAGGTCCCGGAACCGTCCTCCCCGCTCGTCCACCCAGCCCCATCCGTCCCTCCATACCCGTCTCCTCCTCCTCCTCTCCTTTCGTCCAATCCAACCTCCCCCCGCCTCCGCCGTCTTCCTCCTCCTCCCAGAAAGTGACCCCCGTCCCAGCCCCTCCGTCGCTTCCGCCGTCGTCAGGTAACTTCGGAAGCTCGGAAGGCTCGAAGGCAACCGGATTCGGATCTCCGCCGAACACGTTGACGGAGCCGGTGTGGGATACGGTGAAGAGGGATCTGTGTCGGATCGTGAGTAATCTGAAGCTGGTGGTG…
>Rapsat_Rsa1.0_00298.1_g00026.1
ATGGAAAGAAGTGTAATCAGGAGCACAATCAATGACAGACTCGACTGTCCCCAGCGCGTAATGGTGACTCTCCGCTACTCCGCTACGAAGGGTAATCTGGGTGTCAATGTTTGTGTCATTTTGTTTGACAATCGAGCTGTCACCTTCCAAGCTAAGTTTGACAAGAACATCTCTGAGCCAACGGTTATTCTCTTTACAAGGACCCCGCCAAAGTTGTTGGAGCCAGTTTCATATATGGAACTTGAAAGGGTCATTCACGAAATAGCTGCTACCTTGGATCAGATTCACAAGAAGAAAACAAGTCTTGGTATAATCGCTATTGGAAAGGATATGGTGGTCAATTACAGCTTGGAGAAACTGTACTTGGAACTGATAAGGAAAGAGAGGAGAAGAGGAGAT…
>Rapsat_Rsa1.0_00460.1_g00005.1
ATGATGTCTCACAACGAGACAACGTCGCTTTACACATCATCTCAGTCGGACATCGACGAGATAGAGAACATGATCAACAACGACGGAACCGTCTCTTTCTTGTTCCTCCTCTATAGTGGTGCTTATTGTGGTGTTGCTCTTAGCTTTGATATCTTAGGCTCAGGCGTCAGCAGACTAGACACTGATTTGCTTTCCCTTTGTCTTGCCTTAGCATCAGTTTATGCCACCAAACAAGGCTTCCGAAGTATTTGCCGAGGCATTTGCACTACTTGCAGCTGGGGCAGTGATCCTCACACACTAAATGTGCTGCTCCTGGGAGGACATATAATCTTCTTCCAAAGCCTAAGCCTTTTGGGCTACTGTCTATTCCCACTGGACGTTGGAGCTGTGGTCTGCATG…
>Sinalb_Sialb.0699s0019.1
ATGTCGCACAACGACACAGTTCCGCTTTACCAATCCTCTCAATCAGACATCGACGAGATCGAAAACATGATGAGCGAAGGTTTCCAATCAGGTCCCGGAACCGTCCTCCCCGCTCGTCCACCGAGCCCGATCCGTCCCTCAATACCCGTCACATCCTCTCCCTTCGTCCAATCCAACCTCCCACCGCTTCCTCCGCCGTCTTCCTCCTCCGTAGCACAGAAGGTGACGCCTGCTGTTCCCGTCCCTCCGCCGTCAGGTAACTTCGGCAGCAGCAGCTCGGAAGGTGGGAAGACGATGGGGTTCGGGTCTCCGCCGAACACGTTGACGGAGCCGGTGTGGGATACAGTGAAGAGAGATCTGTCGAGGATAGTGAGTAATCTGAAGCTGGTGGTGTTTCCG…
>Sinalb_Sialb.3159s0007.1
ATGTCTCACAACGATACGATTCCGCTTTACCAATCTTCCCAATCAGACATCGACGAGATCGAGAACATGATGAACGACGGTTTTCAATCAGGACCCGGAACCGTCCTCCCCGCTCGTCCACCGAGCCCGATCCGTCCCTCAATACCCGTCTCCTCCTCTCCCTTCGTCCAATCCAACCTCCCTCAGCTTCCTCCGTCTTCCTCCTCCACCACCCAGAAAGTGACTCCCGTTCCAGCTCCTCCGCCGGCAGGTAACTTCGGCAGCTCGGAAGGTTCGAAGACAATCGGAGGGAGCGGGTTCGGGTCTCCGCCGAACACGTTGACGGAGCCGGTGTGGGATACTGTGAAGAGAGATCTGTCGCGGATCGTGAGTAATCTGAAGCTGGTGGTGTTTCCGAAT…
>Sinalb_Sialb.0438s0035.1
ATGTCGCACAACGATACGACACCGCTTTACCAGTCGTCCCAGTCGGACATCGACGAGATCGAGAACATGATGAACAACGACGGCTTTCAATCAAATCCCGGAACCGTCCTCCCTGCTCGTCCCTCAATCCCCGTCACATCCTCACCGTTCGTTCAATCCAACCTCCCACCGCTTCCTCCTCCGTCTTCCCAGAAGGTGACACCTGTTCCAGTCCCTCCTCCGTCGCTTCCTCCTTCAGCTGATTTCAGCAGCAGCTCAGAAGGTCCCAAGACCATCGGGTTCGGGTCTCCGCCGAACACGTTGACGGAGCCAGTGTGGGATACGGTGAAGAGAGATTTGTCGAGGATAGTGAGTAATCTGAAGCTAGTGGTGTTTCCGAATCCGTTTAGGGAAGATCCT…
>Schpar_CM001193.1_FGenesh3895.1
ATGTCGCACAACGATACGACTCCGCTTTATCAGTCGTCTCAGTCGGACATCGACGAGATTGAGAATATGATGAACGACGGTTTTCAATCAGGTCCCGGAACCGTCCTTCCTGCTCGTCCGCCGAGCCCGATCCGTCCCTCCATACCCGTTTCGTCCTCGCCGTTCGTCCAATCCAATCTTCCACCGCTCCCGCCATCTTCCTCCACCTCCACCTCCACCCAGAAGGTGATGCCTGTTCCAGTTCCTCCGTCGCTTCCACCGGCAGGTAATTTCAGCAGCTCCGAAGGTCCGAAGACTATCGGAGGGAGCGGGTTCGGGTCTCCGCCGAACACATTAACGGAGCCTGTGTGGGATACTGTGAAGCGAGATCTGTCGCGGATCGTGAGTAATCTGAAGCTT…
>ArathaSHA_ATSHA-4G58870.1
ATGTCGCACAACGATACGATTCCGCTTTATCAATCATCTCAATCAGACATTGACGAGATTGAGAATATGATGAACGACAGTTTTCAATCAGGTCCCGGAACCGTGCTTCCTGCTCGACCACCGAGTCCGATCCGTCCGTCGATTCCCGTTTCATCCTCACCGTTCGTTCAATCCAATCTCCCACCGCTTCCACCGTCGTCTTCCTCCTCCACTCAGAAGGTGATGCCTGTTCCAGCTCCTCCACCGCTTCCGTCAGCAGGTAACGAAGGTAACAAGAGTATTGGAGGTAGCGGATTCGGATCTCCGCCAAATACATTGACGGAGCCTGTTTGGGATACTGTGAAGCGAGATCTGTCACGGATCGTGAGTAATTTGAAGCTTGTGGTGTTTCCTAATCCG…
>Sisiri_KE155118.1_FGenesh22.1
ATGTCTTCGCACAACGATACAGTTCCGCTATACCAGTCGTCTCAGTCAGACATCGACGAGATTGAGAATATGATGAGCGAAGGGTTTCAATCAGGTCCAGGAACCGTCCTCCCTGCTCGTCCTCCCAGCCCGATCCGTCCCTCCATACCCGTTTCATCCTCGCCGTTCGTTCAATCCAACCTCCCACCGCTTCCGCCGTCTTCTTCCTCTACCCAGAAGGTGATGCCTGTTCCTGTCCCTCCCTCGCTTTCTGCGGCTGCTAATTTCAGTAGCAGCTCCGAAGGTCCCAAGACCATCGGTGGGAGCGGGTTCGGATCTCCTCCGAACACGTTGACGGAGCCTGTGTGGGATACTGTGAAGCGAGATCTGTCTCGGATCGTGAGTAATCTGAAGCTTGTG…
>Stapin_Stapi.5792s0001.1
ATGGATTATGAAAAATCTCATGTGGTGGATGCAACTATTTTCAAGTTTCTTATTAGTCTGGGTTTACACTTTACCGTCCTTCCCGCTCGTCCACCAACCCCGATCTGTCCCTCCATACCCGTTTCATCCTCACCGTTCGTTCAGTCCAACCTTCCACCGCTTCCGCCGTCTTCCTCCACCACATCCTCTACCCAGAAGGTTATGCCTGTTCTTGTCCCTTCGTTGCTTCCTCCGGTTGGTAATTTCAGCAGCTCCGAAGGTCCCAAGACCATTGGTGGGAGCGGGTTCGGATCTCCTCCGAACACGTTGACGGAGCCTGTGTGGGATACTGTAAAGCGAGATCTGTCACGGATCGTGAGTAATTTGAAGCTTGTGATTTTTCCGAATCCGTACAGGGAA…
>Stapin_Stapi.6193s0002.1
ATGTCGCACAACGATACAACTCCGCTATATCAGTCGTCTCAGTCGGACATCGACGAGATCGAGAATATGATGAACGACGGTTTTCAATCAGGTCCCGGAACCGTCCTTCCTGCTCGGCCACCAAGCCCGATCCGTCCCTCCATACCCGTTTCATCCTCACCGTTCGTTCAATCCAACCTCCCACCGTTACCGCCGTCTTCCTCCACCTCCTCCTCCCAGAAGGTGATGCCTGTTCCAGTCCCTCCGTCTCTTCCGCCGGCAGGTAAATTTAGCAGCTCCGAAGGTCCCAAGACCATCGGAGGGAGCGGATTTGGATCTCCGCCAAACACATTGACGGAGCCTGTGTGGGATACTGTAAAGCGAGATCTGTCGCGGATCGTGAGTAATCTGAAGCTTGTT…
>Thlarv_Thlar.0005s1030.1
ATGTCGCACAACGATACGATTCCGCTTTATCAGTCGTCTCAGTCGGACATCGACGAGATTGAGAATATGATGAGCGACAGTTTTCAATCAGGCCCCGGAACCGTCCTTCCTGCTCGGCCGCCGAGCCCGATCCGTCCCTCCATCCCCGTTTCATCCTCGCCGTTTGTCCAATCCAACCTTCCACCGCTTCCGCCGTCTTCCTCCTCCTCAAACGCCCAGAAGGTGATGCCTGTTCCAGTCCCTCCGTCTCTTCCTCCGGCAGGTAATTTCGGCAGCTCAGAAGGTCCCAAGACCATCGGAGGTAGCGGATTCGGATCTCCGCCGAACACATTGACGGAGCCTGTGTGGGATACTGTGAAGCGAGATCTGTCGCGGATCGTGAGTAATCTGAAGCTTGTG…

## Sheet: Yip4a
Back to index
>Aetara_KE151438.1_FGenesh5.1
ATGTCGCACGGCGATACAATACCGCTTCATCCATCTTCTCAATCAGACATTGACGAGATCGAGAATCTGATTAACGACAGTGTCCAATCGGGGCCTGGAACTGTTCTTCCTGCTCGTCCTCCGAGTCCGACTCGTCCTTCGATACCTGTTTCTTCTTCCCCGTTTATTCAATCTAACATTCCACAGATTCCGACTTCGTCGTCTGCTCAGAAGGTTACATCTGTACCTGCGCCTCCTCCTATTCCGTCGGTAGTTATTTCTAGCAACTCACAAGCTCAACAGAATATTGGAGTGAGTGCGTTTGGATCTCCGCCTAATACGTTGACGGAGCCTGTTTGGGATACTGTGAAACGAGATCTGTCTCGTATCGTGAGTAATTTGAAGCTTGTGGTTTTTCCT…
>Aetara_KE151438.1_FGenesh6.1
ATGACTTCAGTCCGAGGTATTCGCCGTGGCATTTGCGCTACTAGCAGCCGGAGCAGTAATCCTTACACTAAACGTGCTTCTCCTGTATCCATAACTCTTGCTTGGAGTTCATGGGCTGCTTACCCTTTCATGAGCTCAGCGGTTAACCCGAGAAGGAAAGCTCTTGCGCTCTACCCGGTCTTCCTCATGTATGTCTCCGTCGGCTTCCTCATCATCGCAATCAATTGA
>Arahal_Araha.34640s0002.1
CTTCATCCGTCTTCATCAGCTCAGAAAGTGACACCTGTCCCCGTTCCTCCGCCTCTTCCAGCTGTAAGTAATTCCAGCAATTTCCAAGGAGGTTCACAGACGATTGGAGCGAGTGCGTTTGGATCTCCGCCTAATACGTTGACGGAGCCTGTGTGGGATACTGTGAAACGAGATCTGTCTAGGATCGTGAGTAATTTGAAGCTTGTGGTGTTTCCTAATCCGTATAGGGAAGATCCTGGGAAGGCTCTTAGAGATTGGGATCTTTGGGGTCCGTTTTTCTTCATTGTCTTCTTGGGTCTGACTCTTTCATGGTCAGCTTCCGTCAAGAAGTCCGAGGTATTTGCAGTGGCATTTGCATTGTTAGCAGCCGGGGCGGTGATCCTTACACTAAACGTGCTT…
>Aralyr_AL3G53110.t1
ATGTCACAAGGCGATACAGTACCGCTTCATCCATCGTCTCAATCAGACATCGACGAGATCGAGAATCTGATTAACGAAAGCGTCCAATCAGGTCCCGGAACCGTTCTCGCCGCTCGTCCACCGAGCCCAACCAGACCGTCGATTCCAGTTTCTTCTTCTTCTCCGTTTATGCAATCGAATCTCCCACCGCTACATCCGTCGTCATCAGCTCAGAAAGTGACACCTGTCCCCGTTCCTCCGCCTCTTCCGGCGGTAAGTAATTCCAGCAATTTCCAAGGAGCGAGTGCGTTTGGATCTCCGCCTAATACGTTGACGGAGCCTGTGTGGGATACTGTGAAACGAGATCTGTCTCGGATTGTGAGTAATTTGAAGCTTGTGGTGTTTCCTAATCCGTATAGA…
>ArathaCOL_AT2G18840.1
ATGTCACAAGGCGATACAGTACCGCTTCATCCATCGTCTCAATCAGACATTGACGAGATCGAGAATCTGATTAACGAAAGCGTCCAATCAGGTCCCGGAACCGTTCTCGCCGCTCGTCCACCGAGCCCAACCAGACCTTCGATTCCAGTATCTTCTTCTTCTTCTTCTTCTCCGTTTATGCAATCGAATCTTCCACCGCTTCATCCGTCGTCATCAGCTCAGAAAGTGACACATGTCCCCGTTCCTCCGCCTCTTCCGGCGGTAAGTAACTCCAGCAATTTCCAAGGAGCGAGTGCTTTTGGATCTCCGCCTAATACGTTGACGGAGCCTGTGTGGGATACTGTGAAGCGAGATCTGTCTCGGATCGTGAGTAATTTGAAGCTTGTGGTGTTTCCTAAT…
>Bislae_OVAU01000945.1_FGenesh1.1
ATGGTGCAGATGCCACCAGAGTCATCAACGTGGATCCGCCACTGGGTGCAACATATCTTTGTGCCAATCCAGGTTCAAGCGGGGGTCTTTTGTGTCTTTCATGTTTCTACAAAAGACCAACTCGCGGGCGCTCTCACTAAGTCGTTGTCTAAACTACTGTTTCAAACTGCATGTTGCAAGATTGATATTAAAGCTTCTTCTTTTGTGTGGTCGATCCGCTTGTCGAGGTGTCTTTTCTCCTTCGTCGGCGCCTCAGTTTTGGAGGCCTGCTCTAGAGCCGCGGCATGCTTTCCTCGCCTCTCTGGTTCGTCGCTTTTCTCTCCCCTGCTCGGACTCTGTGAGTTTTGTTCCTCTCTTATTTTGCTCAACACTTCGTATGTTGTTTCTGGTTGTGTTGGA…
>Bislae_OVAU01009311.1_FGenesh2.1
ATGTCGCACGGCGATACGGTACCGCTTCACCCGTCGTCTCAGTCAGACATCGACGAAATCGAGAATCTAATTAACGAAAGCTTCCAATCAGGTCCGGGAACTGTCCTCGCCGCTCGTCCTCCCAGTCCAACTAGGCCTTCGATTCCCGTTTCTTCCTCTCCGTTTATGCAATCGAACCTTCCACCAATTCCGCCGTCGTCAACCGCTCAAAAAGTTACTCCTGTCCCCGTTCCTCCGCCTCTTCCTGCAGTTAGTAACTCTAGCGGCAGCAACTCGTTAGGCTCGCATAACATTGGAGCGAGTGCGTTTGGATCTCCGCCTAACACGTTGACTGAACCTGTATGGGATACTGTGAAGCGAGATCTTTCACGGATCGTGAGTAATTTGAAGCTTGTGGTT…
>Bislae_OVAU01010922.1_FGenesh2.1
CAATATCCGATATCTGATCCGAACCGAGGAGGTCCGAACCGATATTGGTTCGGATCACATATAAATCTTAAATCTCATAAGAATCTGAAATTTCCGAACAGTATCCGAATTTCCGAACCGTATCCGATCCGTAAAGGTTTGAATAATTCAAACCTATCTTCTGATCTTCACAACGAATCTCGTCATCTTCAAGCTCACAGCAATCTCCGCCGTCTTTCTCGCCTCCATCGCCGTCGTGCACATATTCGGCTGCTGCCAAAATTGATCCCTTACGCTTTTACTCTTGGATCTCCGCCTAACACGTTGACTGAACCTGTATGGGATACTGTTAAGCGAGACCTGTCACGAATCGTGAGTAATTTGAAGCTTGTGGTTTTTCCTAATCCGTGTAGGGAAGAT…
>Boestr_Bostr.18351s0348.1
ATGTCACAAGGCGATACAGTACCGCTTCATCCATCATCTCAATCAGACATCGACGAAATCGAGAATCTGATTAACGAAAGCGTCCAATCAGGTCCCGGAACCGTTCTCGCCGCTCGTCCACCAAGCCCAACCAGACCGTCGATTCCAGTTTCTTCTTCTCCGTTCATGCAATCGAATGTTCCACCGCTTCCTCCGTCGTCATCAGCTCAGAAAGTGACACCTGTCCCCGTTCCTCCGCCTCTTCCGGCTGTAAGTAACTCCAGCAACTCCCAAGGAGGCTCACAGACGATTGGAGCGAGTGCTTTTGGATCTCCGCCTAACACGTTGACGGAGCCTGTATGGGATACTGTGAAACGAGATCTGTCTCGGATCGTGAGTAATTTGAAGCTTGTGGTGTTT…
>Capbur_MPGU01000141.1_FGenesh12.1
ATGTCACAAGGCGATACAGTACCGCTTCATCCATCATCATCTCAATCAGACATCGACGAGATCGAGAATCTGATTAACGAAAGCGTTCAATCAGGTCCCGGAACCGTTCTCGCCGCTCGTCCACCGAGCCCAACGAGGCCATCGATTCCTGTTTCTTCTTCTCCGTTTATGCAATCGAATCTTCCACCGCTTCATCCGTCTTCATCAGCTCAGAAAGTGACACCTGTCCCCGTTCCTCCGCCTCTTCCGGTGGTAAGTAATTCCAGCAATTCTCAAGGAGTCTCACATACGATTGGAGCGAGTGCTTTTGGATCTCCGCCTAACACGTTGACTGAGCCTGTGTGGGATACTGTGAAGCGAGATCTGTCTCGGATCGTGAGTAATTTGAAGCTTGTGGTG…
>Capbur_MPGU01000247.1_FGenesh111.1
ATGTCACAAGGCGATACAGTACCGCTTCATCCATCATCGTCTCAATCAGACATCGACGAGATCGAGAATCTGATTAACGAAAGCGTTCAATCAGGTCCCGGAACCGTTCTCGCCGCTCGTCCACCGAGCCCGACGAGGCCATCGATTCCTGTTTCTTCTTCTCCGTTTATGCAATCGAATCTTCCACCGCTTCATCCGTCTTCATCAGCTCAGAAAGTGACACCTGTCCCCGTTCCTCCGCCTCTTCCCGTGGTAAGTAATTCCAGCAATTCTCAAGGAGTCTCACATACGATTGGAGCGAGTGCTTTTGGATCTCCGCCTAACACGTTGACGGAGCCTGTGTGGGATACTGTGAAGCGAGATCTGTCTCGGATCCTGAGTAATTTGAAGCTTGTGGTG…
>Carhir_CARHR109400.1
ATGTCACACGGCGATACAATACCGCTTCATCCATCGTCTCAGTCAGACATCGACGAGATTGAGAATTTAATCAACGAAAGCGTCCAATCAGGTCCCGGAACAGTCCTCGCCGCTCGTCCACCGAGCCCAACCAGACCGTCGATTCCAGTTTCTTCTTCTCCGTTTATGCAATCGAATCTTCCACCGCTTCCGCCGTCGTCATCAGCTCAGAAAGTGACATCTGTCCCCGTTCCTCCGCCTCTTCCGGTTATAAGTAACTCCAGCAACTCCCAAGGAGGCTCACATAACATTGGAGCTAGCGCGTTTGGATCTCCGCCTAATACGTTGACGGAACCTGTATGGGATACTGTGAAGCGAGATCTGTCTCGGATCGTGAGTAATTTGAAGCTTGTGGTGTTT…
>Capgra_Cagra.0433s0001.1
ATGTCACAAGGCGATACAGTACCGCTTCATCCATCATCATCATCTCAATCAGACATCGACGAGATCGAGAATCTGATTAACGAAAGCGTTCAATCAGGTCCCGGAACCGTTCTCGCCGCTCGTCCACCGAGCCCAACGAGGCCATCGATTCCTGTTTCTTCTTCTCCGTTTATGCAATCGAATCTTCCACCGCTTCATCCGTCTTCATCAGCTCAGAAAGTGACACCTGTCCCCATACCTCCGCCTCTTCCGGTGGTAAGTAATTCCAGCAATTCTCAAGGAGTCTCACATACGATTGGAGCGAGTGCTTTTGGATCTCCGCCTAACACGTTGACTGAGCCTGTGTGGGATACTGTGAAGCGAGATCTGTCTCGGATCGTGAGTAATTTGAAGCTTGTG…
>Capcru_Carub.0003s3307.1
ATGTCACAAGGCGATACAGTACCGCTTCATCCATCATCATCATCTCAATCAGACATCGACGAGATCGAGAATCTGATTAACGAAAGCGTTCAATCAGGTCCCGGAACCGTTCTCGCCGCTCGTCCACCGAGCCCAACGAGGCCATCGATTCCTGTTTCTTCTTCTCCGTTTATGCAATCGAATCTTCCACCGCTTCATCCGTCTTCATCAGCTCAGAAAGTGACACCTGTCCCCGTACCTCCGCCTCTTCCGGTGGTAAGTAATTCCAGCAATTCTCAAGGAGTCTCACATACGATTGGAGCGAGTGCTTTTGGATCTCCGCCTAACACGTTGACTGAGCCTGTGTGGGATACTGTGAAGCGAGATCTGTCTCGGATCGTGAGTAATTTGAAGCTTGTG…
>Camsat_Csa19g058550.1
ATGTCACAAGGCGATACAGTACCGCTTCATCCATCATCTCAATCAGACATCGACGAGATCGAGAATCTCATCAACGAAAGCATCCAATCAGGTCCCGGAACCGTCCTCGCCGCTCGTCCACCGAGCCCAACCAGACCTTCGATTCCAGTTTCTTCTTCTCCGTTTATGCAATCGAATCTTCCCCCGCTTCCTCCGTCGTCATCAGCTCAGAAAGTGACATCTGTCCCCGTTCCTCCGCCTCTTCCGGTTGTAAGTAATTCCAGCAATTCTCAAGGAGGCTCCCAGGGGATTGGAGCGAGTGGTTTTGGATCTCCCCCTAATACGTTGACGGAGCCTGTGTGGGATACTGTGAAGCGAGATCTGTCTCGGATCGTGAGTAATTTGAAGCTTGTGGTGTTT…
>Camsat_Csa01g042020.1
ATGTCACAAGGCGATACAGTACCGCTTCATCCATCATCTCAATCAGACATCGACGAGATCGAGAATCTCATCAACGAAAGCATTCAATCAGGTCCCGGAACCGTCCTCGCCGCTCGTCCACCGAGCCCAACCAGACCTTCGATTCCAGTTTCTTCTTCTCCGTTTATGCAATCGAATCTTCCACCGCTTCCTCCTTCTTCATCAGCTCAGAAAGTGACACCTGTCCCCGTTCCTCCGCCTCTTCCGGTTGTAAGTAATTCCAGCAATTCTCAAGGAGGCTCACAGGGGATTGGAGCGAGTGGTTTTGGATCTCCGCCTAATACGTTGACGGAGCCTGTGTGGGATACTGTGAAGCGAGATCTGTCTCGGATCGTGAGTAATTTGAAGCTTGTTGTGTTT…
>Camsat_Csa16887s010.1
ATGCAATCGAATCTTCCACCGCTTCCTCCTTCTTCATCAGCTCAGAAAGTGACACCTGTCCCCGTTCCTCCGCCTCTTCCGGTTGTAAGTAATTCCAGCAATTCTCAAGGAGGCTCACAGGGGATCGGAGCGAGTGGTTTTGGATCTCCGCCTAATACGTTGACGGAGCCTGTGTGGGATACTGTGAAGCGAGATCTGTCTCGGATCGTGAGTAATTTGAAGCTTGTTGTGTTTCCTAATCCGTATAGGGAAGATCCTGGGAAGGCGCTTAGA
>Camsat_Csa15g079570.1
ATGTCACAAGGCGATACAGTACCGCTTCATCCCTCATCTCAATCAGACATAGACGAGATCGAGAATCTCATCAACGAAAGCATTCAATCAGGTCCCGGAACCGTTCTCGCCGCTCGTCCACCGAGCCCAACGAGACCTTCGATTCCAGTTTCTTCTTCTCCGTTTATGCAATCGAATCTTCCACCGCTTCCTCCTTCGTCATCAGCTCAGAAAGTGACACCTGTCCCCGTTCCTCCGCCTCTTCCGGTTGTAAGTAATTCCAGCAATTCTCAAGGAGGCTCACAGGGGATCGGAGCGAGTGGTTTTGGATCTCCGCCTAATACGTTGACGGAGCCTGTGTGGGATACTGTGAAGCGAGATCTGTCTCGGATCGTGAGTAATTTGAAGCTTGTTGTGTTT…
>Dipstr_Distr.0009s0276.1
ATGTCGCAAGGCGATACGATACCGCTTCATCCGTCGTCTCAGTCGGACATCGACGAGATCGAGAATCTGATTAACGAAAGCGTCCAATCAGGTCCCGGAACCGTCCTTGCCGCTCGTCCGCCTAGTCCTACCAGGCCGTCGATTCCCGTTTCTTCCTCTCCGTTCATGCAATCCAACCTTCCACCGCTTCCGCCGTCGTCCTCCGCTCAGAAAGTGACACCTGTCCCCATTCCTCCGCCACTTCCGGCGGTAGGTAACTCCCAAGGACCACAGACCATTGGAGCGAGCGCGTTTGGTTCTCCGCCTAACACGTTGACGGAGCCTGTATGGGATACTGTGAAGCGAGATCTCTCCCGGATCGTGAGTAATTTGAAGCTGGTGGTTTTTCCTAATCCATAC…
>Isatin_Isati.15132s0002.1
ATGTCGCATGGCGATACGATACCGCTGCATACATCTTCACAATCAGACATCGACGAGATCGAGAATCTCATCAACGAAAGCATCCACTCAGGCCCCGGAACCGTCCTCGCCGCTCGTCCGCCGAGCCCGACGAGGCCGTCGATTCCCGTCTCTTCCTCTCCGTTTATGCAATCGAACCTTCCACCTCTTCCGCCGTACCTTTACGACATTCTGACCAATGCGAGCGTTGTTAAGAATAAGATCCCGGTCCTGCTTTGCTGTAACAAGACAGATAAAGTAACTGCACACACAAAAGAGTTCATCCGCAAGCAGATTGAGAAAGAAATAGAGAAACTTAGGGTTTCGAGGAGTGCGATTTCAACAGCTGACATAGCCAATGACTTCACTCTTGGGATAGAA…
>Isatin_Isati.0345s0015.1
ATGTCGCACGGCGATACGATACCGCTTCAACCATCTTCACAATCAGACATCGACGAGATCGAGAATCTGATCAACGAAAGCATCCAATCAGGCCCCGGAACCGTCCTCGCCGCTCGTCCGCCGAGCCCGACGAGGCCGTCGATTCCCGTCTCTTCCTCTCCGTTTATGCAATCGAACCTTCCACCTCTTCCGCCGTCGTCTTCGTCGTCCTCTCAGAAAGCGACACCTGTCCCCGTCCCTCCGCCTCTTCCGGGGCTAAGTAATCCCCGAGGAGCACAAACGACGATCGGGTTTGGATCTCCGCCCAACACGTTGACGGAGCCTGTGTGGGACACAGTGAAGCGAGATCTGTCTCGGATCGTGAGTAACTTGAAGCTCGTGGTGTTTCCTAATCCGTAC…
>Isatin_Isati.0004s0040.1
ATCGTCGCTGGTGTACTCTTCTCCTCGAACCTTCCACCTCTTCCGCCGTCGTCTTCATCGTCCGCTCAGAAAGCGACATCTGTCCCCGTCCCTCCGTCTCTTCCGGGTGTAAGTAATCCCCGAGGAGCAGAAACGACGATCGGGTTTGGATCTCTGCCCAACACGTTGACGGAGCCTGTGTGGGACACAGTGAAACGATATCTGTCTCGGATCGTGAGTAACTTGAAGCTTGCGGTGTTTCCTAATCCGTACAGGGAGGATCCTGGGAAGGCCCTTAGGGATTGGGATCTTTGGGGTCCCTTTTTCTTCATCGTCTTCCTAGATTTGACTCTTTCATGGTCAGCTTCCTTCAAGAAGTCAGAGGTATTTGCAGTGGTGTTTGCACTACTAGCAGCTGGG…
>Isatin_Isati.0458s0010.1
ATGTCGCACGGCGATACGATACCGCTGCATACATCTTCCCAATCAGACATCGACGAGATCGAGAATCTGATCAACGAAAGCATCCATTCAGGCCCCGGAACCGTCCTCGCCGCTCGTCCGCCGAGCCCGTCGAGGCCGTCGATTCCCGTCTCTTCCTCTCCGTTTATGCAATCGAACCTCCCACCTCTTCCGCCGTCGTCTTCGTCGTCCGCCCAGAAAGCGACACCTGTCCCCGTCCCTCCGCCTCTTCCGGGGCTAAGTAATAATCCCGGAGGAGCACAAACGACGACCGGGTTTGGATCTCCGCCCAACACGTTGACGGAGCCTGTGTGGGACACAGTGAAGCGAGATCTGTCTCGGATCGTGAGTAACTTGAAGCTTGTGGTGTTTCCTAATCCG…
>Isatin_Isati.0458s0015.1
ATGTCGCATGGCGATACGATACCGCTGCATACATCTTCACAATCAGACATCGACGAGATCGAGAATCTGATCAACGAAAGCATCCAATCAGGTCCCGGAACCGTCGTCGCAGCTCGTCCGCCGAGCCCGACGAGGCCGTCGATTCCCGTCTCTTCCTCTCCGTTTATGCAATCGAACCTTCCACCTCTTCCGCCGTCGTCTTCATCGTCCTCCCAGAAAGCGACACCTGTCCCCGTCCCTCCGCCTCTTCCGGGGCTAAGTAATAATCCCCGAGGAGCAGAAACGGCGATCGGGTTTGGATCTCCGCCCAACACGTTGACGGAGCCTGTGTGGGACACAATGAAGCGAGATCTGTCTCGGATCGTGAGTAACTTGAAGCTCGTGGTGTTTCCTAATCCG…
>Isatin_Isati.1353s0012.1
ATGTCGCATGGCGATACGATACCGCTGCATACATCTTCACAATCAGACATCGACGAGATCGAGAATCTGATCAACGAAAGCATCCACTCAGGTCCCGGAACCGTCCTCGCCGCTCGTCCGCCGAGCCCGACGAGGCCGTCGATTCCCGTCTCTTCCTCTCCGTTTATGCAATCGAACCTCCCACCTCTTCCGCCGTCGTCTTCGTCGTCCGCCCAGAAAGCGACACCTGTCCCCGTCCCTCCGCCTCTTCCGGGGCTAAGTAATAATCCCCGAGGAGCACAAACGACGATCGGGTTTGGATCTCCGCCCAACACGTTGACGGAGCCTGTGTGGGACACAGTGAAGCGAGATCTGTCTCGGATCGTGAGTAACTTGAAGCTCGTGGTGTTTCTTAATCCG…
>Isatin_Isati.0583s0005.1
ATGTCGCACGGCGATACGATACCGCTGCATACATCTTCACAATCAGACATCGACGAGATCGAGAATCTCATCAACGAAAGCATCCAATCAGGCCCCGGAACCGTCGTCGCCGCTCGTCCGCCGAGCCCGACGAGGCCGTCGATTCCCGTCTCTTCCTCTCCGTTTATGCAATCGAACCTTCCACCTCTTCCGACGTCGTCTTCATCGTCCTCTCAGAAAGCGACACCTGTCCCCGTCCCTCCGCCTCTTCCGGGGCTAAGTAATAATCCCCGAGGAGCAGAAACGACGATCGGGTTTGGATCTCCGCCCAACACTTTGACGGAGCCTGTGTGGGACACAGTGAAGCGAGATCTGTCTCGGATCGTGAGTAACTTGAAGCTCGTGGTGTTTCCTAATCCG…
>Isatin_Isati.4071s0004.1
ATGTCGCATGGCGATACGATACCGCTGCATACATCTTCACAATCAGACATCGACGAGATCGAGAATCTGATCAACGAAAGCATCCACTCAGGTCCCGGAACCGTCCTCGCCGCTCGTCCGCCGAGCCCGACGAGGCCGTCGATTCCCGTCTCTTCCTCTCCGTTTATGCAATCGAACCTTCCACCTCTTCCGCCGTCGTCTTCGTCGTCCGCCCAGAAAGCGACACCTGTCCCCGTCCCTCCGCCTCTTCCGGGGCTAAGTAATAATCCCACGACGATCGGGTTTGGATCTCCGCCCAACACGTTGACGGAGCCTGTGTGGGACACAGTGAAGCGAGATCTGTCTCGGATCGTGAGTAACTTGAAGCTCGTGGTGTTTCCTAATCCGTACAGGGAGGAT…
>Lunann_Luann.0373s0033.1
ATGTCACACGGGGATACGATACCGCTTCATCCATCGTCTCAATCGGACATCGACGAGATCGAGAATCTGATTAACGAAAGTGTCCAATCAGCTCCCGCAACCGTCCTCGCTGCTCGTCCGCCGAGCCCAACAAGACCGTCGATTCCCGTTTCTTCCTCTCCGTTTATGCAATCGAACCTCCCACCGCTTCCGCCGAAGTCATCATCCGCTCAGAAAGTGACACCTGTCCCCGTCCCTCCCCCTCTTCCGGCGGTTGGTAACTCCAGTAACTTCCAAGGATCACAGACGATTGGAGCGAACGCGTTCGGATCTCCGCCTAACACGTTGACGGAGCCTGTATGGGATACTGTGAAAAGAGATCTGTCTCGGATCGTGAGTAATTTGAAGCTGGTGGTTTTC…
>Lunann_Luann.0378s0007.1
ATGTCCCACGGCGATACGATACCGCTTCATCCATCGTCTCAGTCGGACATCGACGAGATCGAGAATTTGATTAATGAAAGCGTTCAATCAGGTCCAGGAACCGTTTTCGCCGCTCGTCCGTCGAGCCCGACCAGGCCCTCGATTCCCGTTTCTTCCTCTCCGTTTATGCAATCGAACCTTCCACCGCTTCCGCCGTCTTCATCCGCTCAGAAAGTAACTACCGTCCCCAACATTGGAGCGAGCGCGTTTGGATCTCCACCTAACACGTTGACTGAGCCTGTATGGGACACTGTGAAACGAGATCTGTCCCGGATCGTGAGTAATTTGAAGCTGGTGGTTTTTCCTAATCCATATAGGGAGGACCCTGGAAAGGCGCTTAGGGATTGGGATCTTTGGGGG…
>Lepsat_Lesat.0035s0233.1
ATGTCGCACGGCGATACGGTACCGCTTCATCCATCGTCTCAGTCAGACATAGACGAGATCGAGAATCTGATCAATGAAAGCGTCCAATCAGGTCCAGGAACTGTCCTTCCCGCTCGTCCGCCGAGCCCAACTAGGCCGTCAATTCCAGTTTCTTCTGCTCCGTTCATGCAATCGAACCTTCCACCGCTTCCACCGTCTTCATCAGCTCTGAAAGTGACGCCTGTCCCCGTCCCTCCGCCTCTTCCGGCGGTAAATAACTCCAGCACCTCGCATGGAGCACAGAACATTGGAGCGAATGCGTTTGGATCTCCACCTAATACGTTGACAGAACCAGTTTGGGATACTGTGAAGCGAGATCTGTCTCGGATCGTCAGTAATTTGAAGCTGGTTGTGTTTCCT…
>Lepsat_Lesat.0099s0171.1
ATGTCGCACGGCGATACGATACCGCTTCATCAATCGTCTCAGTCAGATATCGACGAGATCGAGAATCTGATCAATGAAAGCGTCCAATCAGGTCCCGGAACTGTACTTCCCGCTCGTCCGCCGAGCCCAACTAGGCCGTCGATTCCAGTTTCTTCTGCTCCGTTCATGCAATCGAACCTTCCACCGCTTCCACCGTCGTCATCAGGTCAGAAAGTGACGCCTGTCCCCATACCTCCGCCTCTTCCGGCGGTTAGTAACTCCAGCACCTCCCATGGATCACAAAATATTGGAGCGAGTGCGTTTGGATCTCCGCCTAATACGTTGACAGAACCAGTGTGGGAAACTGTGAAGCGAGATCTGTCTCGGATCGTTAGTAATCTGAAGCTGGTGGTTTTTCCT…
>Rorisl_Roisl.0066s0018.1
ATGTCGCACGGCGATACCATACCGCTTCATTCATCATCTCAATCAGACATCGACGAGATCGAGAATCTAATTAACGAAAGCGTTCAATCAGGTCCCGGAACCGTCCTCGCCGCTCGTCCACCGAGTCCAACGAGGCCGTCGATTCCTGTTTCTTCTTCTCCGTTTATGCAATCGAATCTTCCACCGCATCCGCAGTCGTCATCAGCTCATAAAGTGACTTCCGTTCCTGTTCCTCCGCCTCTTCCGGTGATAAGTAACTCCAGTAACTCTCAAGGAGGTTCACAGAACATTGGAGCTAACGCGTTTGGATCTCCGCCTAATACGTTGACGGAGCCTGTGTGGGATACTGTGAAGCGAGATCTGTCTCGGATCGTGAGTAATTTGAAGCTTGTAGTGTTT…
>Schpar_CM001189.1_FGenesh4205.1
ATGTCGCACGGCGATACGATACCGCTTCATCCATCTTCTCAGTCAGACATCGACGAGATTGAGAATCTGATTAACGAAAGCGTCCAATCAGGTCCCGGAACCGTCCTCGCCGCTCGTCCGCCGAGCCCAACCAGGCCTTCGATTCCCGTTTCTTCCTCTCCGTTTATGCAATCGAACCTTCCACCTCTTCCGCCGTCGTCTTCATCATCCGCTCAGAAAGTGACACCTGTCCCCGTCCCTCTCCCTCTTCCAGCGGTAGGCAACTCCAGTAATTCTCAAGGAGCACATAACATTGGAGCGAGCGGGTTTGGATCTCCGCCTAACACGTTGACGGAGCCTGTATGGGACACTGTGAAGCGAGATCTGTCAAGGATCGTGAGTAATTTGAAGCTGGTGGTT…
>Schpar_AFAN01000064.1_FGenesh9.1
ATGTCGCACGGCGATACGATACCGCTTCATCCATCTTCTCAGTCAGACATCGACGAGATTGAGAATCTGATTAACGAAAGCGTCCAATCAGGTCCCGGAACCGTCCTCGCCGCTCGTCCGCCGAGCCCAACCAGGCCTTCGATTCCCGTTTCTTCCTCTCCGTTTATGCAATCGAACCTTCCACCTCTTCCGCCGTCGTCTTCATCATCCGCTCAGAAAGTGACACCTGTCCCCGTCCCTCTCCCTCTTCCAGCGGTAGGCAACTCCAGTAATTCTCAAGGAGCACATAACATTGGAGCGAGCGGGTTTGGATCTCCGCCTAACACGTTGACGGAGCCTGTATGGGACACTGTGAAGCGAGATCTGTCAAGGATCGTGAGTAATTTGAAGCTGGTGGTT…
>ArathaSHA_ATSHA-2G35640.1
ATGTCACAAGGCGATACAGTACCGCTTCATCCATCGTCTCAATCAGACATTGACGAGATCGAGAATCTGATTAACGAAAGCGTCCAATCAGGTCCCGGAACCGTTCTCGCCGCTCGTCCACCGAGCCCAACCAGACCTTCGATTCCAGTATCTTCTTCTTCTTCTTCTCCGTTTATGCAATCGAATCTTCCACCGCTTCATCCGTCGTCATCAGCTCAGAAAGTGACACATGTCCCCGTTCCTCCGCCTCTTCCGGCGGTAAGTAACTCCAGCAATTTCCAAGGAGCGAGTGCTTTTGGATCTCCGCCTAATACGTTGACGGAGCCTGTGTGGGATACTGTGAAGCGAGATCTGTCTCGGATCGTGAGTAATTTGAAGCTTGTGGTGTTTCCTAATCCG…
>Sisiri_KE155375.1_FGenesh26.1
ATGAAAAGATGCCCTAAGTTGGAGGTTTTATGTATTAATAGCTGCTTAAGTGTCACAGATGCTTCGATAACAAATATAGCTTTGAGCTGTCCTAATTTAGAGGTTTTATGGATTAAGAGCTGCTTAGACGTGACAGATGCATCAGTGGCAAAGATAGCTTCGAACTGCACTAAGCTTAGGGAGCTCGATATCAGCAACTCTCTTAAAATATCTCAAAAGGCTTTGAAAATGGTTGAGAAGAGTAGCAAAAATGTGAAGATCATCATAGAACCTCCTTCAAATGTTAGACTATCTCAAACCGAGGCCAGTAGCTTAGGACTATCAATTGACATAACATGGGGTGATGGTAGAGGAAAAGTTTTGAACAATGGTACTCTTCTGAACCTCACTCTTGATCAA…
>Thlarv_Thlar.0020s0079.1
ATGTCGCAAGGCGATACGATACCGCTTCATCCATCTTCTCAATCAGACATCGACGAGATCGAGAATTTGATTAACGAAAGCTTCCAATCAGGTCCCGGAACCGTCCTCGCTGCTCGTCCGCCGAGCCCTATAAGACCATCGATTCCCGTTTCTTCCTCTCCGTTTATGCAATCGAACCTTCCACCGCTTCCTCCGTCGTCGTCTTCCGCTCAGAAAGTGACTTCCGTCCCCGTCCCTCCGCCTCTTCCGGCGTCAGGTAACTCCCAAGGTGCACAGAACATTGGAGCTAGCGGGTTTGGATCTCCGCCTAACACGTTGACGGAGCCTGTATGGGACACAGTGAAGCGTGATCTGTCTCGGATCGTGAGTAATCTGAAGCTGGTGGTTTTTCCTAATCCA…

## Sheet: Aba1
Back to index
>Aetara_KE150831.1_FGenesh50.1
ATGTATCTTATGATGCTTCTGCTTGTGAAATCAGGCTGGGAGATAGACAAGGTTGCTGAGGAATTGACTTACGCAGATGCAATGGGATGCAAAGAAAAATTTTGTCACGAGGGAAGGTGGAGTTCAAATATCAGGTATTCATTGATGCTTAAGTTTCTTCTCTGGAAACGGCTGCATCATCATAGTCGGCTACTTGATCACCCTGCCACTTCGTCATCGTACAACATCATCATGCTACATCATTTCTGCCACTCATCGTGCCATTTATCATCGAATCATCATCATTCACCATGCCACATCAACATCATCAACCACATCGTCATCAGCCACATCATCATCAGCCACATCATCATCAGCCACATCATCAGCCACATCATCATCATGCTACATCATTTCTGC…
>Aetara_KE151798.1_FGenesh34.1
ATGAAGTGTGACATTGTGATGATGCCACCTGTCCTCTTTTGCCTCCATCACAGCTTCCTCTTCAAATCTCATCACCTCTTCTTCTCTCTCTCTAAAGAGTTGGGCATAAACAGAGAAGCAAAAACGGCGGTGGTTGAGGAGGAGAAGAAAGGGGAGATAATAACGGAGAAGAAGAAATCGAGGGTTTTGGTTGCTGGTGGTGGAATTGGGGGTTTAGTGTTTGCTCTTGCTGCGAAAAAGAAAGGATTTGATGTGACTGTGTTTGAGAAAGATTTGAGTGCTATAAGAGGAGAAGGACAATACAGAGGTCCGATTCAGATTCAAAGTAACGCTTTAGCTGCTTTAGAAGCCATTGATGTAGCTGTTGCTGAAGAAGTTATGGAAGCTGGTTGTATTACT…
>Arahal_Araha.5826s0010.1
ATGGGTTCAACTCCGTTTTGCTATTCGATCAATCCATCTCCATCAAAGCTTGATTTCACGAGGACCCATGTGTTTAGTCCCGTTGCTAAACAGTTTTACTTAGATTTATCATCGTTTTCCGGAAAATCTGGTGGAGGATTATCTGGGTTTAGGAGCCGGAAAACTCTGGTCGGAGTAAAGGCGGCGACGGCGTTGGTTGAGAAGGAGGAGAAGAGAGAGGCGGTGCCGGAGAAGAAGAAGAAATCGAGGGTTTTAGTTGCCGGAGGTGGAATTGGAGGTTTGGTGTTTGCTTTAGCTGCGAAGAAGAAAGGATTCGATGTGTTAGTGTTTGAGAAAGATTTGAGTGCTATAAGAGGAGAAGGACAATACAGAGGTCCGATTCAAATACAGAGCAACGCT…
>Aralyr_AL8G44330.t1
ATGGGTTCAACTCTGTTTTGCTATTCGATCAATCCATCTCCATCAAAGCTTGATTTCACGAGGACCCATGTGGTTAGTCCCGTTGCTAAACAGTTTTACTTAGATTTATCATCGTTTTCCGGAAAATCTGGTGGAGGATTATCTGGGTTTAGGAGCCGGAAAACTCTGGTCGGAGTAAAGGCGGCGACGGCGTTGGTTGAGAAGGAGGAGAAGAGAGAGGCGGTGACGGAGAAGAAGAAGAAATCGAGGGTTTTAGTGGCCGGAGGTGGAATCGGAGGTTTGGTGTTTGCTTTAGCTGCCAAGAAGAAAGGATTCGATGTGGTAGTGTTTGAAAAAGATTTGAGTGCTATAAGAGGAGAAGGACAATACAGAGGTCCGATTCAAATACAGAGCAACGCT…
>Araalp_lcl_CM002876.1_KFK28343.1_20428
ATGGGTTCAACTCCGTTTTGCTATACAATCAATCCATCACCATCAAAGCTCGATTTCACAAAGACCCATCTCGCTAAACAGTTCTATCTAGATTTATCATCCTTCACCGGAAAATCTGGAGCTGGATTATCAGGGATTAAGAACCGTCGCGGTGTGGTGGGAGTAAAGGCGTCAGCGACGGCGTTAGTGGAGGAGGAGAAGAGGGAGACAGTGACGGAGAAGAAGAAGAAATCGAGGGTTTTAGTAGCTGGAGGTGGAATTGGAGGTTTAGTGTTTGCTCTTGCAGCGAAGAAGAAAGGGTTTGATGTTTTAGTGTTTGAGAAGGATTTGAGTGCTATTAGAGGAGAAGGACAATACAGAGGTCCGATTCAAATACAGAGTAATGCTTTAGCTGCTTTA…
>ArathaCOL_AT5G67030.1
ATGGGTTCAACTCCGTTTTGCTACTCTATCAATCCATCTCCATCAAAGCTTGATTTCACGAGGACCCATGTGTTTAGTCCTGTTTCTAAACAGTTTTACTTAGATTTATCATCGTTTTCCGGAAAACCCGGAGGAGTATCTGGGTTTAGGAGCCGTCGAGCTTTGCTCGGAGTAAAGGCGGCGACGGCGTTAGTTGAGAAGGAGGAGAAGAGAGAGGCGGTGACGGAGAAGAAGAAGAAATCGAGGGTTTTAGTTGCCGGAGGTGGAATCGGAGGATTGGTGTTTGCTTTAGCGGCTAAGAAGAAAGGATTCGATGTGTTAGTGTTTGAGAAAGATTTGAGTGCTATAAGAGGAGAAGGAAAATACAGAGGCCCGATTCAAATACAGAGCAACGCTTTA…
>Bislae_OVAU01007805.1_FGenesh1.1
ATGAGTTCTTCCACTCCGTTTTGCTATTCAATCAATCCATCTCCGTCAAAGCTTGATTTCACTAAGAGCCATGTGTTTAGTCCCGTTGCTAAACAGTTCTATCTTGATTTATCATCGTTTGCCGGAAAATCCGGAGGATTATCGGGATTAAAGAGCCGTAGAAGTTTGGTCGGAGTAAAGGCGGCGATGACGTTAGTGGAGGATGAGAAGCGAGAGGCGGTGACTGAGAAGAAGAAATTGAGGGTTTTGGTAGCCGGAGGTGGAATCGGAGGTTTAGTGTTTGCTCTTGCGGCGAAGAAGAAAGGTTTCGATGTGTTGGTGTTCGAGAAGGATTTGAGTGCTATAAGAGGAGAAGGTCAATATAGAGGTCCGATTCAAATACAGAGCAATGCTTTGGCT…
>Bislae_OVAU01033803.1_FGenesh1.1
ATGCGATTTCGCGTCGAACTCGATTTCGTGGCGAATGCGACTTTGATGCGTTTCTGGCTCGACGACGTGAAGCGGAGTGGCACATGCAAAGCTATTAGGGTATCTTTGATGTTTGTATATTTTATTCTAACACATTTTTCTTCTATTGAGGTTCCATGGCAAGGTGAATGCTATGAAGGTTATCTGCTTGAGAATGGTGAATGCTATAAAGGTGATCTGCTTGTTGGTGCAGATGGCATATGGTCTAAAGTGAGAAATAATTTGTTTGGACGAAGTGAAGCTAGTTGTTGA
>Braole_Parent=BolC7t42992H;Name=BolC7t42992H
ATGAAGTGTGAAGCGGTGGTGATGCCACCTGTCTCCTCCTTCTCCATCATTTGCCTTTCTTCTCCTCCTTCAAATCATTTCCTTCCTCTCTCTCTCTCTCGTCTCCACTCGGAAGAAGCGCACCACATAGAAAACTTTTGTATCCTTCCTTATCAGGAGCTAGCTCTTCTCATCGAGATGGGTTCAACTCCCTTCTGCTACTCAATCAACCCATCTCCGTCAAAGCTCGATTTCACGAAGACCCACGCGTTCAGCCCCGTCGCCAAACAGTTCTATCTCGACTTACCGTCGTTCGCCGGCAAATCGGGGATACGAAAGCGTCGAGCTTTAATCGGAGTAAAGGCGGCGGCGGCGGCTTTAGTGGCGGAGGAGGAGACGCGGGAGACGGCGGCGGAGAGT…
>Braole_Parent=BolC9t54020H;Name=BolC9t54020H
ATGAGTTCAACTCCGATTTGCTATTCGATCAATCCATCTCCATCTAAGCTCGATTTCACGAGGACCCATGTGCTTACTCCCCTCGCTAAACAGTTCTACTCACACTTACCATCCTTCACCGGAAAATCAAGGAGCCGTCGGAGTTTGGTCGGAGTAAAGGCGGCGACTTTATCTTCGGAGGAGCAGAAGACAGCGACGGAGAAGAAGAAACCGAGGGTTCTGGTGGCCGGAGGTGGAATCGGAGGTCTGGTGTTTGCTCTGGCGGCGAAGAAGAAAGGGTTCGATGTGTTGGTGTTCGAGAAGGATCTGAGCGCTATAAGAGGAGAAGGACAGTACAGAGGTCCGATTCAGATACAGAGCAACGCTTTGGCTGCTTTGGAAGCCATTGATGTCTCTGTC…
>Brajun_BjuA011762
ATGGGTTGTTCAACTCCCTTCTGCTACTCAATCAACCCATCTCCATCAAAGCTCGATTTCACCAAAACCCACGCGTTCAGCCCCGTCGCCAAACAGTTCTATCTCGACTTACCGTCGTTCGCCGGCAAATCGGGAGGGGGATTATCGGGGTTAAGAAAGCGTCGAGCTTTGGTCGGAGTAAAGGCGGCGACTTTGTTGGCGGAGGAGGAGAAGCGGGAGACAGTAACCGAGAGTAAGAAGAAACCGAGGGTTCTCGTGGCCGGAGGCGGAATCGGAGGTTTAGTGTTCGCTCTCGCGGCGAAGAAGAAAGGGTTCGATGTGTTGGTGTTCGAGAAAGACTTAAGCGCCATAAGAGGAGAAGGACAGTACAGAGGTCCGATTCAGATTCAGAGCAACGCC…
>Brajun_BjuA032756
ATGAGTTCAACTCCGATTTGCTATTCGATCAATCCATCTCCATCAAAGCTCGATTTCACGAGAACCCATCTGCTCACTCCCCTCGCTAAACACTTCTACTCACACTTACCATCCTTCACCGGAAAATTAAGTAACCGTCGGAGGAGTTTGGTCGGAGTAAAGGCGGCGACTTTATCGTCGGAGGAGAAGAAGACAGCGACGGAGAAGAAGAAACCGAGGGTTCTGGTGGCCGGAGGTGGGATCGGAGGACTGGTGTTTGCTCTCGCGGCGAAGAAGAAAGGGTTCGATGTGTTGGTGTTCGAGAAGGATCTGAGCGCTATAAGAGGAGAAGGACAGTACAGAGGTCCGATTCAGATACAGAGCAACGCTTTGGCTGCTTTGGAAGCTATCGATGTCTCT…
>Brajun_BjuB039522
ATGGTTTCAACTCCGTTTTGCTATTCGATCAATCAATCTCCATCAAATCTCGATTTCACGAGGACCCATTTTCTTACTCCCGTCGCTAAACATTTCTACTTAGACTTACCAAAACCGGGAGGTGGGTTAAGGAGGAGCCGTCGTCGTCGAAGTTTGGTCGGAGTAAAGGCGGCGACTTTGTCGGTGGATGAGCAGAAGAAGCGGGAGAAGAGGAAGAAGAAACCGAGGGTGCTGGTGGCGGGAGGTGGAATCGGAGGACTGGTGTTTGCTCTTGCGGCGAAGAAGAAAGGGTTCGATGTGTTGGTGTTCGAGAAGGATCTGAGCGCTATAAGAGGAGAAGGACAGTACAGAGGTCCGATTCAGATACAGAGCAATGCTTTGGCTGCTTTGGAAGCTATT…
>Brajun_BjuB020853
ATGAAGTGTGAAGCGGTGGTGATGCCACCTGTCTTCTCCTTCTCCACCATATGCCTTTCTTCTCCTCCTTCAAATCAAATCATTTCATTCCTCTCTCTCGTCTCCACTCAGAATCAGAAGCGCACCACAGATAAACTTTCCTATTCTCAGCGGAGTTTGCTCTTCTCACCGAAGATGGGTTCAACTCCTTTCTGCTACTCAATCAACCCATCTCCATCAAAGCTCGATTTCACCAAGACCCACGTGTTCAGTCCCGTCGCTAAACAGTTCTACCTAGACTTCTCCTCGTTCGCCGGCAAATCGGGAGGAGGATTAAGAAAGCGTCGAGCTTTGGTCGGAGTAAAGGCGGCGACTTTGTTGGTGGAGGATGAGGAGAAGCGGGAGACGGTGATTGAGAAG…
>Branig_CM004491.1_FGenesh5788.1
ATGGGTTCAACTCCGTTTTGCTATTCGATCAATCAATCTCCATCAAATCTCGATTTCACGAGGACCCATTTGCTTACTCCCGTCTCTAAACAGTTCCACTTAGACTTACCAAAATCGGGAGGTGGGTTAAGGAGGAGCCGTCGTCGTCGAAGTGTGGTCGGAGTAAAGGCGGCGACTTTGTCGGTGGATGAGCAGAAGAAGCGGGAGAAGAGGAAGAAGAAACCGAGGGTGCTGGTGGCGGGAGGTGGAATCGGAGGACTGGTGTTTGCTCTAGCGGCGAAGAAGAAAGGGTTCGATGTGTTGGTGTTCGAGAAGGATCTGAGCGCTATAAGAGGAGAAGGACAGTACAGAGGCCCGATTCAGATACAGAGCAATGCTTTGGCTGCTTTGGAAGCCATT…
>Branig_CM004494.1_FGenesh2456.1
ATGGGTTCAACTCCTTTCTGCTACTCAATCAACCCATCTCCATCAAAACTCGATTTCACCAAGACCCACGTGTTCAGTCCCGTCGCTAAACAGTTCTACCTAGACTTCTCCTCGTTCGCCGGCAAATCGGGGTTGAGAAAGCGTCGAGCTTTGGTCGGAGTAAAGGCGGCGACTTTGTTGGTGGGGGATGAGGAGAAGCGGGAGACGGTGACGACGGAGGAGAAGAAGAAACCGAGAGTTCTGGTGGCAGGAGGTGGAATCGGAGGTCTGGTGTTTGCTCTCGCGGCGAAGAAGAAAGGGTTCGATGTGTTGGTGTTCGAGAAGGATCTGAGCGCCATAAGAGGAGAAGGACAGTACAGAGGTCCGATTCAGATACAGAGCAACGCTTTGGCTGCTTTG…
>Brarap_Parent=BraA07t29416Z;Name=BraA07t29416Z
ATGGGCTCAACTCCCTTCTGCTACTCAATCAACCCATCTCCATCAAAGCTCGATTTCACCAAGACCCACGCGTTCAGCCCCGTCGCCAAACAGTTCTACCTCGACTTACCGTCGTTCGCCGGCAAATCGTGGCTAAGAAAGCGTCGAACTTTAATCGGAGTAAAGGCCGCGGCGGCGACTTTGGTGGCGGAAGAGGAGAAGCGTGAGACAGTAACCGAGAGTAAGAAGAAACCGAGGGTTCTCGTGGCCGGAGGCGGAATCGGAGGTCTGGTGTTCGCTCTCGCGGCGAAGAAGAAAGGGTTCGATGTGTTGGTGTTCGAGAAAGACTTAAGCGCCATAAGAGGAGAAGGACAGTACAGAGGTCCGATTCAGATACAGAGCAACGCCTTGGCTGCTCTG…
>Brarap_Parent=BraA09t36606Z;Name=BraA09t36606Z
ATGAGTTCAACTCCGATTTGCTATTCGATCAATCCATCTCCATCAAAGCTCGATTTCACGAGAACCCATCTGCTCACTCCCCTCGCTAAACACTTCTACTCACACTTACCATCCTTCACCGGAAAATTAAGTAACCGTCGGAGGAGTTTGGTCGGAGTAAAGGCGGCGACTTTATCGTCGGAGGAGAAGAAGACAGCGACGGAGAAGAAGAAACCGAGGGTTCTGGTGGCCGGAGGTGGGATCGGAGGACTGGTGTTTGCTCTCGCGGCGAAGAAGAAAGGGTTCGATGTGTTGGTGTTCGAGAAGGATCTGAGCGCTATAAGAGGAGAAGGACAGTACAGAGGTCCGATTCAGATACAGAGCAACGCTTTGGCTGCTTTGGAAGCTATCGATGTCTCT…
>Branap_BnaA09g07610D
ATGAGTTCAACTCCGATTTGCTATTCGATCAATCCATCTCCATCAAAGCTCGATTTCACGAGGACCCATGTGCTCACTCCCCTCGCTAAACACTTACCATCCTTCACCGGAAAATTAAGTAACCGTCGGAGGAGTTTGGTCGGAGTAAAGGCGGCGACTTTATCGTCGGAGGAGAAGAAGACAGCGACGGAGAAGAAGAAACCGAGGGTTCTGGTGGCCGGAGGTGGGATCGGAGGACTGGTGTTTGCTCTGGCGGCGAAGAAGAAAGGGTTCGATGTGTTGGTGTTCGAGAAGGATCTGAGCGCTATAAGAGGAGAAGGACAGTACAGAGGTCCGATTCAGATACAGAGCAACGCTTTGGCTGCTTTGGAAGCTATTGATGTCTCTGTTGCTGAAGAA…
>Branap_BnaC08g48380D
ATGAAGAAAAGATTGTTTGAAATATTTGAAGGTTGGTGCGACAATGTGCTGGACTTGCTGCATGCGACAGAGGAGGAAGCGATTCTGAGAAGAGATATCTACGATAGAACTCCTAGCTTCACTTGGGGTAAAGGGCGTGTTACGCTGCTCGGTGATTCTATTCATGCGATGCAGCCTAACATGGGGCAAGGTGGATGTATGGCCATTGAGGATAGTTATCAATTAGCATTGGAGCTTGAAGAAGCTTGGAAAAAGAGTGTTGCAACTAATAAACCTGTTGATATTGTTTCATCTTTGAAAAGATACGAGGAATCTAGAAGAGTAAGAGTGGCTATTATACATGGAATGGCGAGAATGGCTGCGATTATGGCGTCTACTTACAAAGCATACTTAGGTGTT…
>Branap_BnaC07g16350D
ATGAAGTGTGAAGCGGTGGTGATGCCACCTGTCTCCTCCTTCTCCATCATTTGCCTTTCTTCTCCTCCTTCAAATCATTTCCTTCCTCTCTCTCTCTCTCGTCTCCACTCGGAAGAAGCGCACCACATAGAAAACTTTTGTATCCTTCCTTATCAGGAGCTAGCTCTTCTCATCGAGATGGGTTCAACTCCCTTCTGCTACTCAATCAACCCATCTCCGTCAAAGCTCGATTTCACGAAGACCCACGCGTTCAGCCCCGTCGCCAAACAGTTCTATCTCGACTTACCGTCGTTCGCCGGCAAATCGGGGATACGAAAGCGTCGAGCTTTAATCGGAGTAAAGGCGGCGGCGGCGGCTTTAGTGGCGGAGGAGGAGACGCGGGAGACGGCGGCGGAGAGT…
>Branap_BnaA07g12170D
ATGAAGTGCACATCACACATTAAACTTCCTTTGCGAGCTTCTCGAATCGAGATGGGTTCTTCAACTCCCTTCTGCTACTCAATCAACCCATCTCCATCAAAGCTCGATTTCACCAGGACCCACGCGTTCAGCCCTGTCGCCAAACAGTTCTATCTCGACTTACCGTCGTTCGCCGGCAAATCGGGAGGGGGATTATCGGGGTTAAGAAAGCGTCGAACTTTAATCGGAGTAAAGGCCGCGGCGGCGACTTTGGTGGCGGAAGAGGAGAAGCGTGAGACAGTAACCGAGAGTAAGAAGAAACCGAGGGTTCTCGTGGCCGGAGGCGGAATCGGAGGTCTGGTGTTCGCTCTCGCGGCGAAGAAGAAAGGGTTCGATGTGTTGGTGTTCGAGAAAGACTTA…
>Branap_BnaC09g07550D
ATGTGTTCAACTCCGATTTGCTATTCGATCAATCCATCTCCATCTAAGCTCGATTTCACGAGAACCCATGTGCTCACTCCCCTCGCTAAACAGTTCTATTCACACTTACCATCCTTCACCGGAAAATCAAGGAGCCGTCGGAGTTTGGTCGGAGTAAAGGCGGCGACTTTATCTTCGGAGGAGCAGAAGACAGCTACGGAGAAGAAGAAACCGAGGGTTCTGGTGGCGGGAGGTGGAATCGGAGGTCTGGTGTTTGCTCTGGCGGCGAAGAAGAAAGGGTTCGATGTGTTGGTGTTCGAGAAGGATCTGAGCGCTATAAGAGGAGAAGGACAGTACAGAGGTCCGATTCAGATACAGAGCAACGCTTTGGCTGCTTTGGAAGCCATTGATGTCTCTGTC…
>Boestr_Bostr.0568s0126.1
ATGGGTTCAACTCCGTTTTGCTATTCAATCAATCCATCTCCATCAAAGCTTGATTTCACGAGGACCCATGTGTTTAGTCCCGTTGCTAAACAGTTTTACTTAGATTTATCATCCTTTACCGGGAAATCAGGAGGAGGATTATCTGGGTTTAGGAGCCGTCGAGCTTTGGTCGGAGTAAAGGCGGCGACGGCGTTGGTTGAGGAGGAGCAGAAGCGAGAGGCAGTGACGGAGAAGAAGAAGAAATCGAAGGTTTTAGTTGCCGGAGGTGGAATCGGAGGTTTGGTGTTTGCTTTAGCTGCGAAGAAGAAAGGGTTCGATGTGTTGGTGTTTGAGAAAGATTTGAGTGCCATTAGAGGAGAAGGACAATACAGAGGTCCGATTCAAATACAGAGCAACGCT…
>Capbur_MPGU01000148.1_FGenesh76.1
ATGATCAACAATAACGATGATGACGAAGAGTTTCCGAGAGGATATCTGATTCTCCAACCGGAAGAGCTCCGGCCATTGGAACTTCTCCGTCTGTTATTCTCCGGTGATATCGAGAAGCCAAGATTAGTAGATAGTTCAGAGACCAAAGAACCAAGTTTCCGACGTCGATGGCTTATCTTCGTCTCTCTCGTCCTTCTCAAGCTTCTCCGATTCTTTTCGGAGATATTGGCTCTCCTTGGCTCCGCCTTAGAATTCTCTTTAAACTTCCTCTCCGATAACTCTTTCTCCGGTTTCTTCCTCCGAGGACAAGTGGTGTTGCCGAAGCCGACGTCGGAGAATTATCAATCTTTTATCGGACATTTGGACAGGAGAATAAGTTTAGACAAGACTATGAATCGC…
>Capbur_MPGU01000535.1_FGenesh25.1
ATGGGTTCAACTCCGTTTTGCTATTCAATCAATCCATCTCCATCAAAGCTTGATTTCACGAGGACCCATGCGTTTAGTCCCGTTGCTAAACAGTTTTACTTAGATTTATCATCCTTTACTGGGAAATCAGGAGTTGGAGGAGGATTATCTGGGTTTAGGAGCCGTCGGGCATTGGTCGGAGTAAAGGCTGCGACGGCGTTGGTTGAGGAGGACCAGAAGCCAGGGGAAGTGACGGAGAAGAAGAAGAAATCGAGGATTTTAGTTGCCGGAGGTGGAATCGGAGGTTTGGTGTTTGCTTTAGCTGCGAAGAAGAAAGGGTTCGATGTGTTGGTGTTTGAGAAAGATTTGAGTGCTATTAGAGGAGAAGGACAATACAGAGGTCCAATTCAAATACAGAGT…
>Carhir_CARHR036590.1
ATGTCACATTTGAAAGGGATGTTCTGTGTTTTTAGCGGAAATGAAGCTACTTGTTCAGGCTACACTTGCTACACCGGCGCTGATATTGAGTCTATTGGCTACCGAGTTTTCTTGGGACACAAACATTACTTTGTTTCTTCTGATGTTGGTGGTGGGAAAATGCAATGGTACGCATTTCATGAGGAACCAGCTGGTGAAGCTGATGCTGCATGA
>Carhir_CARHR126560.1
ATGGTTAAGTTCAAATTTGCCCCTGATTTGGATATTTCCTGCGTGCTATGGGCAAAGAAGAAAGGGTTTGATGTGTTGGTGTTTGAGAAAGATTTAAGTGCTATAAGAGGAGAAGGACAGTACAGAGGTCTGATTCAAATACAGAGCAACGCTTTAGCTGCTTTGGAAGCTATTGATACTGATGTCGCTGAAGAAGTTATGGAAGCTGGTTATATTACTGGTGATTGGATTAATGCTCTCGTCGATGGTGTCTCTGGTACTTGGTGA
>Carhir_CARHR126560.2
GTGCTATGGGCAAAGAAGAAAGGGTTTGATGTGTTGGTGTTTGAGAAAGATTTAAGTGCTATAAGAGGAGAAGGACAGTACAGAGGTCTGATTCAAATACAGAGCAACGCTTTAGCTGCTTTGGAAGCTATTGATACTGATGTCGCTGAAGAAGTTATGGAAGCTGGTTATATTACTGGTGATTGGATTAATGCTCTCGTCGATGGTGTCTCTGGTACTTGCTGTTGGTGTATCAGCAATGGAAGCAGCAACAAGAAGCTTGGATATATAAGTCTAGTTTCATTGGATTTTAATATTTTGTACAATTCTAATGAGTCACTTTGA
>Carhir_CARHR217720.1
ATGTGGAGCCTGAGCTTTGGCCAAGATTTGAGTGCTATAAGAGGAGAAGGACAATACAGAGGTCTGATTCAAATACAGAGCAACGCTTTAGCTGCTTTGGAAGCTATTGATACTGATGTCGCTGAAGAAGTTATGGCAGCTGGTTGTATTACTGGTGATTGGATTAATGGTCTCGTCGATGTGATTAGAAACGAGAGTAATGTTGTTGATTTTGAAGATTCTGGAGATAAGATGACTACACCTTTGTTAGAGTATCACTAA
>Carhir_CARHR280630.1
ATGGGTTCAACTCCGTTTTGCTATTCAATCAATCAATCTCCATCAAAGCTTGATTTCACAAGAACTCATGTGTTTAGTCCAGTTTCTAAACAGTTTTACTTAGATTTATCATCGTTCGCCGGAAAATCTGGAGTAGGATCATCGGGGTTTAGGAGCCGTCGAACTTTGGTCGGAGTAAAAGCGGCGACGGCTCTGGTAGAGGAGGAGAAGAAGCGAGAGACAGTGACGGAGCAGAAGAAGAAATCGAGGATTTTAGTAGCCGGAGGTGGAATCGGAGGTTTAGTGTTTGCTTTAGCGGCGAAGAAGAAAGGGTTTGATGTGTTGGTGTTTGAGAAAGATTTGAGTGCTATAAGAGGAGAAGGACAATACAGAGGTCCGATTCAAATACAGAGCAACGCT…
>Capgra_Cagra.2428s0001.1
ATGGGTTCAACTCCGTTTTGCTATTCAATCAATCCATCTCCATCAAAGCTTGATTTCACGAGGACCCATGTGTTTAGTCCCGTTGCTAAACAGTTTTACTTAGATTTATCATCCTTTACTGGGAAATCAGGAGTTGGAGGAGGATTATCTGGGTTCAGGAGCCGTCGGGCTTTGGTCGGAGTAAAGGCTGCGACGGCGTTGGTTGAGGAGGAGCAAAAGCCAGGGGAAGTGACGGAGAGGAAGAAGAAATCGAGGGTTTTAGTTGCCGGAGGTGGAATCGGAGGTTTGGTGTTTGCTTTAGCTGCGAAGAAGAAAGGGTTCGATGTATTGGTGTTTGAGAAAGATTTGAGTGCTATTAGAGGGGAAGGACAATACAGAGGTCCGATTCAAATACAGAGT…
>Capcru_Carub.0008s2747.1
ATGGGTTCAACTCCGTTTTGCTATTCAATCAATCCATCTCCATCAAAGCTTGATTTCACGAGGACCCATGTGTTTAGTCCCGTTGCTAAACAGTTTTACTTAGATTTATCATCCTTTACTGGGAAATCAGGAGTTGGAGGAGGATTATCTGGGTTCAGGAGCCGTCGGACTTTGGTCGGAGTAAAGGCTGCGACGGCGTTGGTTGAGGAGGAGCAAAAGCCAGGGGAAGTGACGGAGAGGAAGAAGAAATCGAGGGTTTTAGTTGCCGGAGGTGGAATCGGAGGTTTGGTGTTTGCTTTAGCTGCGAAGAAGAAAGGATTCGATGTATTGGTGTTTGAGAAAGATTTGAGTGCTATTAGAGGAGAAGGACAATACAGAGGTCCGATTCAAATACAGAGT…
>Camsat_Csa02g075650.1
ATGGGTTCAACTCCGTTTTGCTATTCAATCAATCCATCTCCATCAAAGCTTGATTTCACGAGGACACATGTGTTTAGTCCCGTTTCTAAACAGTTTTACTTAGATTTATCATCCTTCACCGGGAAATCATCAGCAGGAGGAGGAGGAGGAGGGTTTAGGAGCCGTCGAGGTTTGGTCGGAGTAAAGGCGGCGACAGCGTTAGTTGAGGAGAAGCGAGAGTCAGGGACAGAGAAGACAAAGAAGAAATCGAGGGTTTTAGTTGCTGGAGGTGGAATCGGAGGTTTGGTGTTTGCTTTAGCTGCGAAGAAGAAAGGGTTCGATGTGTTGGTGTTTGAGAAAGATTTGAGTGCTATTAGAGGTGAAGGACAATACAGAGGTCCGATTCAAATACAAAGCAAC…
>Camsat_Csa18g040510.1
ATGGGTTCAACTCCGTTTTGCTATTCAATCAATCCAACTCCATCAAAGCTTGATTTCACGAGGACACATGTGTTTAGTCCCGTTTCTAAACAGTTTTACTTAGATTTATCATCCTTCACCGGGAAATCAGGAGTAGGAGCAGGAGGGTTTAGGAGCCTTCGAGCTTTGGTCGGAGTAAAGGCGGCGACGGCGTTGGTTGAGGAGGAACAGAAGCGAGAGTCAGTGACGGATAAGACGAAGAAGAAATCGAGGGTTTTAGTTGCTGGAGGTGGAATCGGAGGTTTGGTGTTTGCTTTAGCTGCGAAGAAGAAAGGGTTCGATGTGTTGGTGTTTGAGAAAGATTTGAGTGCTATTAGAGGAGAAGGACAATACAGAGGTCCGATTCAAATACAGAGCAAC…
>Camsat_Csa11g103900.1
ATGGGTTCAACTCCGTTTTGCTATTCAATCAATCCATCTCCATCAAAGCTTGATTTCACGAGGACACATGTGTTTAGTCCCGTTTCTAAACAGTTTTACTTAGATTTATCATCCTTCACTGGGAAATCAGCAGGAGGAGGAGGAGGGTTTAGGAGCCGTCGAGCTCTTGTCGGAGTAAAGGCGGCGACGGCGTTGGTTGAGGAGAAGCGAGAGTCAGGGACAGAGAAGAAGAAGAAATCGAGGGTTTTAGTTGCCGGAGGTGGAATCGGAGGTTTGGTGTTTGCTTTAGCTGCGAAGAAGAAAGGGTTCGATGTGTTGGTGTTTGAGAAAGATTTGAGTGCCATTAGAGGAGAAGGACAATACAGAGGTCCGATTCAAATACAAAGCAACGCTTTGGCT…
>Dipstr_Distr.0003s0359.1
ATGGGTTCAACTCCGTTTTGCTATTCAATCAATTCATCTCCATCAAAACTCGATTTCACAAGAACCCATGTGTTTACACCCGTCGATTTATCACAATTCGTCGGAAAATCCGGAGGGTTCTCGGCGTTTAAGAGTCGTCGAGGTTTAATCGGAGTAAAGGCGGCGACTTTAATCGAATCGGAGGTTGATAAGAAACCTCTTTTAACTCCAGCTTCAGTTCCAGCTCCGGCGGAGGAGAATAAGAAGAAATCGAGGGTTTTGGTCGCCGGAGGTGGAATCGGAGGATTAGTGTTTGCTTTAGCTGCGAAGAAGAAAGGATTCGATGTTTTGGTGTTTGAGAAAGATTTGAGTGCGATTAGAGGAGAAGGACAATACAGAGGTCCGATTCAAATACAGAGC…
>Eutesa_Thhalv10003769m
ATGGGTTCAACTCCGTTTTGCTATTCAATCAATCCATCGCCATCAAAGCTTGATTTCACGAGGACCCATGTGTTTAGTCCCGTCGCGAAACAGTTTTACTTAGATCTATCATCGTGTGCTGGAAAATCGGGAGGAGGATTATCTGGGTTTAGGAGCCGTCGAGCTTTGGTCGGAGTAAGGGCGGCGACGGCGTTAGTGGAGGAAGAGAAGCGAGAGATAGCGAAAGAGAAGAAGAAACCGAGGGTTTTAGTGGCCGGAGGTGGAATCGGAGGGTTGGTGTTTGCTCTCGCGGCGAAGAAGAAAGGATTCGATGTGTTGGTGTTTGAGAAAGATTTGAGCGCCATAAGAGGAGAGGGACAATACAGAGGTCCGATTCAGATACAGAGCAACGCTTTGGCT…
>Eruves_Eruve.2353s0017.1
ATGATGAGTCACATAATGTTGAAGCAATTTGAAGAATTGAAATGTTTACCCCTATACCTAAGCACCACAAACATAACATTGTCAAAGACATCACAAGCCACACCAGCCTCAGTCCCATGTGCTCTCTGTCGCTACGGCATTGTCTCTTTCACCAAACTTCCCCATACGATACCAACAAGAACATCAACATCAAGAACAAGCATCTCCTTGTCCTTCTGCAGTTGCTCCTCTGATGTCTTGGACACAGGAGCCCTCCTCACCGACCCTCACTACAGTTGTAAACCGGTTGTTTCAAGAACCGGATCACAATCCGTTGGATCATCATCTTTTCGTTCTCTTAGCTGCCGGTTTCCTCCACGTCTCTGCCTCGGTGGCTTGGATGTTGATGAACCGCAGAGC…
>Eruves_Eruve.2151s0014.1
ATGGGTTCAACTCCGTTCTGCTACTCAATCAACCCATCTCCATCAAAACTCGATTTCACCAAGACCCATGTCTTCAGCCCCGTCGCCAAACAGTTCCACCTCGACCTCTCACCCCTCACCGGAAAACCCCTAAGAAAGCGTCGAGCTTTACTCGGAGTAAAGGCGGCGACTTTATTGGCCGAATCAGAGGAGAAGCGAGAGGGAATAACGGAGAAGAGGAAGAAGCCGAGGGTTCTGGTGGCGGGAGGTGGAATCGGAGGATTAGTGTTTGCTCTAACGGCGAAGAAGAAAGGGTTTGATGTGTTGGTGTTTGAGAAGGATTTAAGCGCTATAAGAGGAGAAGGACAGTACAGAGGTCCGATTCAGATACAGAGCAACGCTTTGGCTGCGTTGGAAGCT…
>Eruves_Eruve.3733s0016.1
ATGAGTTCAACTCTGTTTTGCTATTCAATCAATCAATCTCCATCTAAGCTCGATCTCACGAAGACCCATTTGCTTACTCCACACTTCTACTTAGACTTACCATCCTTCACCGGAAAATTAAGGAGCCGTCGTCGGAGTTTGGTCGGAGTAAAGGCGGAGACTTTATCAGTGGAGGATGATCAGAAGAAGAAGAAGAAGAAACCAAAGGTTCTGGTGGCGGGAGGTGGAATCGGAGGATTAGTGTTTGCTCTCGCGGCGAAGAAGAAAGGGTTTGAAGTGTTGGTGTTCGAGAAGGATTTGAGCGCTATAAGAGGAGAAGGACAGTACAGAGGTCCGATTCAGATACAGAGCAATGCTTTAGCTGCTTTGGAAGCTATTGATATTACCGTTGCTGAACAA…
>Eruves_Eruve.2902s0003.1
ATGAGTTCAACTCTGTTTTGCTATTCAATCAATCAATCTCCATCTAAGCTCGATCTCACGAAGACCCATTTGCTTACTCCACACTTCTACTTAGACTTACCATCCTTCACCGGAAAATTAAGGAGCCGTCGTCGGAGTTTGGTCGGAGTAAAGGCGGAGACTTTATCAGTGGAGGATGATCAGAAGAAGAAGAAGAAGAAACCAAAGGTTCTGGTGGCGGGAGGTGGAATCGGAGGATTAGTGTTTGCTCTAGCGGCGAAGAAGAAAGGGTTCGAAGTGTTGGTGTTCGAGAAGGATTTGAGCGCTATAAGAGGAGAAGGACAGTACAGAGGTCCGATTCAGATACAGAGCAATGCTTTAGCTGCTTTGGAAGCTATTGATATCTCTGTTGCTGAACAA…
>Eruves_Eruve.4132s0008.1
ATGGTAGCTCCCCTTCTTGCAGCTCAAGATTCCGGCGACCGGAGTGGTGATAGGGGTAGAAGAGGGGCCGTAAGTGATGACATACCAAACATTACTCCTGCCAATGACGTCCCTAGCTCAGAGAGCAAATTATGTTTTCTCTTTTTCTTTTATTTTCTCCACTTCGTCTTCACTTCTTGTCTTCTCCGAAGATTGAAATCAAGGACCTCTCGAAACAACCACCGATCCTCCACCACCATCTCTATCGGTTCAACTCCGTTATGCTACTCAATCAACCCATCTCCATCAAAGCTCGATTTCACCAAGACCCATGTGTTCAGCCTCGTCGCTAAACAGTTCTACCTAGACTCCCCATCGTTCGCCGGTAAATCGGAGCTAAGAAAGCGTCGAGCTTTGGTC…
>Isatin_Isati.1625s0020.1
ATGCAGCCAAATCTGGGCCAAGGTGGATGCATGGCCATTGAGGATAGTTTTCAACTAGCATTGGAGCTTGAAGAAGCATGGAAACAGAGTGTTGAAACTAATACGCCCGTTGATGTTGTTAATTCTTTGAAAAGATACGAGGAATCTAGAAGACTCAGAGTCGCTATTATTCATGCAATGGCGAGAATGGCTGCAATAATGGCTTCCACTTACAAAGCGTACTTAGGTGTTGGGCTTGGTCCTCTGTCTTTCTTGACCAAGTTTAGAGTGCCACATCCGGGAATAGTTGGTGGAAGATTCTTCATTGACATTGCTATGCCTTTGATGCTTAACTGGGTTCTTGGAGGCAACAGTGAAAAACTCGAAGGAAGGACACCCAGTTGTAGACTCACTGACAAA…
>Isatin_Isati.1224s0002.1
ATGGGTTCAACTCCGATTTGCTATTCAATCAATTCATCTCCGTCAAAACTCGATTTCACAAAAACCCATCTTTCTAATTCAATCTCAAAGCAACTCTACTTAGATTTATCGCCTTTAATCGGAGTAAAGGCAGCGACTTTAGTCAAATCGGAGAAGAAATCTCAGTCTACTCCAACTCTGGCTAAGAAGAAATATCGGGTTTTGGTAACGGGAGGTGGAATCGGAGGATTAGTGTTTGCACTAGCGGCGAAGAAGAAAGGATTCGATGTTTTGGTGTTTCAGAAAGATTTGAGTGCGATTAGAAGAGAAGTACAATACAGAGGTCCGATTCAAATACAGAGTAATTTTATAGTTGCTTTAGAAGCTATTGATACTGATGTTGCTGAACAACGGACTAAA…
>Isatin_Isati.1055s0004.1
ATGGGTTCAACTCCGATTTTCTATTCAATCAATTCATCTCCGTCAAAACTGATTTCACAAAAAAACCATCTTTCTAATTCAATCTCAAAACAACTCTACTTCGATTTATCACCGTTCGCCGCCGGGAAATCAGGATTCAAGAGCCGTCGAAGTTTAATCGGAGTAAAGGCAGCCACTTTAGTCAAATCGGAGAAGAAATCTCAGTCTACTCCAACTCTGGCTAAGAAGAAATCTCGGGTTTTGGTAACGGGAGGTGGAATCGGAGGATTAGTGTTTGCACTAGCGGCGAAGAAGAAAGGATTCGATGTTTTGGTGTTTGAGAAAGATTTGAGTGCGATTAAAGGAGAAGTACAATACAGAGGTCCGATTCAAATACAGAGTAATGTTTTAGCTGCTTTA…
>Isatin_Isati.4934s0003.1
ATGGGTTCAACTCCGATTTGCTATTCAATCAATTCAGCTCCGTCAAAACTCGATTTCACAAAAACCCTTCTTTCTAATTCAATCTCAAAGCAACTCTACTTAGATTTATCACTGTTCGCCGCCGGGAAATCAGGATTCAAGAGCCGTCGACGTTTAATCGGAGTAAAGGCAGCGACTTTAGTCAAATCGGAGAAGAAATCTCAGTCTACTCCAACTCTGGCTAAGAAGAAATCTCGGGTTTTGGTAACGGGAGGTGGAATCAGAGGATTAGTGTTTGCACTAGTGGCGAAGAAGAAAGGATTCGATGTTTTGGTGTTTGAGAAAGATTTGAGTGCGATTAGAGGAGAAGTACAATACAGAGGTCCGATTCAAATACAGAGTAATGTTTTAGCTGCTTTA…
>Isatin_Isati.3585s0005.1
ATGGGTTCAACTCCGATTTGCTATTCAATCAATTCATCTCCGTCAAAACTCGATTTCACAAAAACCCTTCTTTCTAATTCAATCTCAAAGCAACTCTACTTAGATTTATCACCGTTCGCCGCTGGGAAATCAGGATTCAAGAGCCGTCGAAGTTTAATCGGAGTAAAGGCAGCGACTTTAGTCAAATCGGAGAAGAAATCTCAGTCTACTCCAACTCTGGCTAAGAAGAAATCTCGGGTTTTGGTAACGGGAGGTGGAATCGGAGGATTAGTGTTTGCACTAGTGGCGAAGAAGAAAGGATTCGATGTTTTGGTGTTTGAGAAAGATTTGAGTGCGATTAGAGGAAAAGTACAATACAGAGGTCCGATTCAAATACAGAGTAATGTTTTAGCTGCTTTA…
>Isatin_Isati.7774s0001.1
ATGGGTTCAACTCCGTTTTGCTATTCAATCAATCCATCTCCATCGAAGCTCGATTTCACGAGGACCCATGTCTTTAGTCCCGTCGCTAAGCAGTTCTATCTAGACTTACCATCGTTTACCGGAAGATCGGGGTTTAGGAGCCGTCGGGCTTTGGTCGGAGTAAAGGCGGCGACGGCGTTGGTGGAGGATGAAAAGCGGGAGACTTTGACGGAGAAGAAGAAATCGAGGGTTTTAGTGGCCGGAGGTGGGATAGGAGGTCTGGTGTTTGCTCTTGCGGCGAAGAAGAAAGGGTTCGATGTGTTGGTGTTCGAGAAGGACTTGAGCGCCGTAAGAGGGGAAGGACAATACAGAGGTCCGATTCAAATACAGAGCAACGCTTTGGCTGCTTTGGAAGCCATT…
>Isatin_Isati.0097s0005.1
ATGGCTGTTGCTGAAGAAGTTATGGAAGCTGGCTGTATCACCGGTGATCGGATTAACGGCCTCGTCGACGGTGTCTCTGGTACTTGGTATGTAAAGTTTGATACTTTCACTCCTGCGGCGTCACGGGGACTTCCGGTTACTCGGGTTATTAGCAGAATGACTCTGCAGCAGATCTTAGCACGCGCGGTTGGAGAAGAAATTATTAGAAATGAGAGTAATGTTGTTGATTTTGAGGACTCTGGAGATAAGGTCACGGTCGTGCTTGAGAATGGACAACGTTATGAAGGTGATCTGCTTGTGGGTGCAGATGGCATATGGTCTAAAGTGAGAAATAACTTGTTCGGTCGAAGTGAAGCTAGTTACTCAGGCTACACTTGTTACACTGGCATTGCAGATTTT…
>Lunann_Luann.0136s0094.1
ATGGGTTCAACTCCGTTTTGCTATTCAATCAATCCTTCTCCATCAAAGCTTGATTGCACAAGAACCCATGTGTTTAGTCCCGTCGCTAAACAGTTCTACCTAGATCTGTCATCGTTTGGCGGAGTAGGAGGAGGATTATCGGGGTTAAGGAGCCGTCGTCGAACTTTGATCGGAGTGAAGGCGGCGACGGCGTTGGTGGAGCAGGAGAAGCGAGAGACAGTGACGGAGAAGAAGAAATCGAGGGTTTTGGTGGCAGGAGGTGGAATCGGAGGTTTAGTGTTTGCTCTTGCGGCGAAGAAGAAAGGATTCGATGTGTTGGTGTTCGAGAAGGATTTGAGCGCCATTAGAGGAGAAGGACAATACAGAGGTCCGATTCAAATACAGAGCAACGCTTTGGCT…
>Leaala_KE156592.1_FGenesh10.1
ATGGGTTCAACTCCGTTTTGTTATTCAATCAATCAATCTCCTTCACAGCTTGATTTCACGAGAAGTCATGTTTTTACTCCAGTTTCTAAACAGTTTTACTTAGATTTATCATCGTTCGCCGGGAAATCGGGGTTTAAGACCCGTCGAACTGTAATCGGAGTAAAGGCAGCGACGGCTTTGGTAGAGGAGGAGAAGAAGCGAGAGACAGTGACGGAGAAGAAGAAATCGAGGATTTTAGTGGCAGGAGGTGGAATCGGAGGTTTAGTGTTTGCTTTAGCAGCGAAGAAGAAAGGTTTCGATGTGTTGGTGTTTGAGAAAGATTTAAGTGCCATAAGAGGAGAAGGACAGTACAGAGGTCCTATTCAAATACAGAGCAACGCTTTAGCTGCTTTGGAAGCT…
>Leaala_KE158277.1_FGenesh11.1
ATGGGTTCAACTCCGTTTTGTTATACAATCAATACATCTCCACCTAAGCTTGCGAAAACTCATGTGTTTAGTCCCGTTTATAAACAATTTTACTTAGATTTATCATCTGGAGTAAGGTTATCTGGATTTAGGAGCCGTCGAACTTTGGTCGGAGTAAAGGCGGCGACGGCGTTACTGGCGGAAGAGAAGAAGCGAGAGACGTTTAAGGAGAAGAAAAAATCGAGGGTTTTAGTGGCCGGAGGTGGAATCGGAGGTTTAGTATTTGCTTTAGCAGCAAAGAAGAAAGGGTTTGATGTGTTGGTTTTTGAGAAAGATTTGAGTGCTATAAGAGGAGAAGGACAATATAGAGGTCCGATTCAAATGCAGAGCAACGCTTTAGCTGCTTTGGAAGCTATTGAT…
>Lepsat_Lesat.0284s0106.1
ATGGGTTCAACTCCTTTTTGCTATTCAATCAATCCATCTCCATCTAAGCTTGATTTCACGAAGACCCATGTGTTTAGTCCTCTAGCTAAACAGTTTTACTTAGATTTATCATCGTTTGCCGGAAAATCTGTAGGAGGATTATCTGGATTTAGGAGTCGTCGAGCTTTGGTTGGAGTTAAAGCGGCGACAGTATTGGTTGAGGAGGAGAAGCGAGGGGTAGTGAAGGAGAAGAAGAAATCGAGAGTTTTAGTTGCTGGAGGTGGAATTGGAGGGTTAGTGTTTGCTCTTGCGGCGAAGAAGAAAGGTTTCGATGTATTGGTGTTTGAGAAAGATTTGAGTGCCATAAGAGGAGAAGGTCAATACAGAGGTCCAATCCAAATACAGAGTAACGCTTTAGCT…
>Lepsat_Lesat.0055s0001.1
ATGGGTTCAACTCCTTTTTGCTATTCAATCAATCCATCTCCATCTAAGCTTGATTTCACGAAGACCCATGTGTTTAGTCCTCTAGCTAAACAGTTTTACTTAGATTTATCATCGTTTGCCGGAAAATCTGTAGGAGGATTGTCTGGATTTAGGAGTCGTCGAACTTTGGTTGGAGTTAAGGCAGCGACAGTATTGGTGGAAGAGGAGAAGCGAAAGTTAGTGAAGGAGGAGAAGAAATCGAGAGTTTTAGTTGCTGGAGGTGGAATTGGAGGGTTAGTGTTTGCTCTTGCAGCGAAGAAGAAAGGTTTCGATGTGTTGGTGTTTGAGAAAGATTTGAGTGCTATAAGAGGAGAAGGTCAATACAGAGGTCCGATTCAGATACAGAGCAACGCTTTAGCT…
>Noccae_OVBC01003522.1_FGenesh1.1
ATGGGTTCAACTCCGTTTTGCTATTCAACCAATCCTTCTCCATCAAAGCTTGATTTCACTAGAACCCATGCGTTTAGTCCCCTTGCTAAACAGTTCTACCTAGATTTATCATCGCTTGCCGGAAAATCGGGAGGAGGATTATCGGGAGTTAGGAGTCCTCGGACTTTGGTCGGAGTAAAGGCGGCAGCGGCGACGGCGTTGGTGGAGGAGGAGAAGCGGGAAGTAGTGGCGGAGAAGAAGAAATCGAGGGTTTTGGTCGCCGGAGGTGGAATCGGAGGATTGGTGTTTGCTCTTGCGGCGAAGAAGAAAGGGTTCGATGTGTTGGTGTTCGAGAAGGATTTGAGCGCCATAAGAGGAGAAGGACAATACAGAGGTCCGATTCAAATACAGAGCAACGCA…
>Rorisl_Roisl.0024s0563.1
ATGGGTTCAACTCCGTTTTGCTATTCAATCAATCCATCTCCATCAAAGCTTGATTTCACGAGAACTCATGTCTTTAGTCCCGTCGCTAAACAGTTTTACTTAGATTTATCATCGTTTGCTGGAAAATCTGGAGTAGGATTATCGGGTTTTAGGAGCCGTCGAGGTTTGGTCGGAGTAAAGGCGGCGACGGCGTTAGTAGAGGATGAGAAGAAGCGAGAGACAGTGACGGAGAAGAAGAAATCGAGGGTTTTAGTTGCCGGAGGTGGAATCGGAGGTTTAGTGTTTGCTTTAGCGGCGAAGAAAAAAGGGTTCGATGTGTTGGTGTTTGAGAAAGATTTGAGTGCTATAAGAGGAGAAGGACAATACAGAGGTCCAATTCAAATACAGAGCAACGCTTTA…
>Rapsat_Rsa1.0_00999.1_g00014.1
ATGGGTTCTTCAACTCTGTTCTGCTACTCAATCAACCCATCTCCATCGAAGCTCGATTTCACGAAGACCCACGTGTTCAGCCCCGTCGCTAAACAGTTCTACCTAGACTTCCCCTCGTTCGCCGCCGGAAAGTTACGGTTAAGAAAGCGTCGAGCTTTGGTGGGAGCAAAGGCGGAGACTTTGTTGGAGGAGAAGCGGGAGACAGTGACCGAGAAGAAGAAGAAACCGAGGGTTCTGGTGGCCGGAGGTGGAATCGGAGGTCTGGTGTTTGCTCTGGCGGCGAAGAAGAAAGGGTTCGACGGTGTTGGTGTTCGAGAAGGACTTGAGCGCAGCAACGCTTTGGCTGCTCTTGAAGCTATCGATATTGGTGTTGCGGAAGAAGTCATGGAAGCTGGCTGT…
>Rapsat_Rsa1.0_03558.1_g00001.1
ATGGCGCTTCCACACATACTCTCTTCCTCACCTTCTTCAACATCGTTATCTCCGTCTTTCAAACCAAAGCCTCCTCTCTCACCGTCCTTCGCTAGTAGTAGCACTCTCCGTCGGTGCAAGCTCACCTCCTCCTTCCGATGCTCCTCCTCCTCTCTCCCCGAGAAGCATCACAACGCGAACCCTCCACCGAAACAAGACGACGTCGTCCACCTCCCTCTCTTCCCTCTCCCTCTCGTCCTCTTCCCCGGCGCCATCCTCCCTCTCCAGATCTTCGAGTTCCGCTACCGCATCATGATGCACACCCTCCTCGAGTCCGACCTCCGTTTCGGCGTCGTCTACTCCGACGCCGTCTCCGGCTCCGCCGCGGAGGTCGGATGCGTCGGGGAGGTCGTCAAGCAC…
>Rapsat_Rsa1.0_18306.1_g00001.1
ATGGGTTCTTCAACTCTGTTCTGCTACTCAATCAACCCATCTCCATCAAAGCTCGATTTCACCAGGACCCATGTCTTCAGCCCCGTAGCTAAACAGTTCTACCTAGACTTCCCCTCGTTCGCCGCCGGAAAATTACGGTTAAGAAAGCGTCGAGCTTTGGTCGGAGCAAAGGCGGCGACTTTGTTGGAGGAGAAGCGGGAGACGGTGACCGAGAAGAAGAAGAAACCGAAGGTTCTGGTGGCCGGAGGTGGAATCGGAGGTTTGGTGTTTGCTCTGGCGGCGAAGAAGAAAGGGTTCGATGTGTTGGTGTTCGAGAAGGACTTGAGCGCCATAAGAGGAGAAGGACAGTACAGAGGTCCGATTCAGATACAGAGCAACGCT
>Rapsat_Rsa1.0_36274.1_g00001.1
CATAAGAGGAGAAGGACAGTACAGAGGTCCGATTCAGATACAGAGCAACGCTTTGGCTGCTCTTGAAGCTATCGATATTGGCGTTGCGGAGGAAGTCATGGAAGCTGGCTGTATCACCGGTGATCGGATTAACGGTCTCGTCGACGGTGTCTCTGGTACTTGGTATGTAAAGTTTGATACTTTCACTCCTGCGGCGTCACGTGGGCTCCCTGTGACTCGGGTGATTAGCAGAATGACTCTGCAGCAGATCTTAGCACGTGCGGTTGGAGAAGAAATTATTAGAAACGAGAGCAATGTTGTTGACTTTCAAGACTCTGGAGATAAGGTGGTAACAGTGGTGCTTGAGAATGGACAACGTTATGACGGTGATCTTCTTGTTGGTGCAGATGGCATATGGTC…
>Sinalb_Sialb.0205s0063.1
ATGGGTTCAACTCCGTTTTGCTATTCAATCAATCAATCTCCATCAAAGCTCGATTTCACCAGGACCCATCTGCTAAGTCCCGTCGCTAAACAGTTCTACTTTCACTTACCATCGGGAGGTGGTGGGTTAAGGAGGAGCCGTCGTCGAAGTTTGGTCGGAGTAAAGGCGGCAACTTTGTCAGTGGAGGAGCAGAAGAAGACGAAGAAGAAGAAGAAACCGAGGGTTCTGGTGGCGGGAGGTGGAATCGGAGGTTTGGTGTTTGCTCTTGCGGCGAAGAAGAAAGGGTTCGATGTGTTGGTGTTCGAGAAGGATCTGAGCGCTATAAGAGGAGAAGGACAGTACAGAGGTCCGATTCAAATACAGAGCAACGCTTTGGCTGCTTTGGAAGCCATTGATGTT…
>Sinalb_Sialb.0666s0013.1
ATGGGTTCAACTCCGTTCTGCTATTCAATCAACCCATCCCCATCTAAGCTCGATTTCACGAGGACCCATGTGTTTAGCCCCGTCGCTAAACAGTTCTACCTAGACTTCTCATCGTTCACCGGAAAATCGGGAGGAGGGTTAAGAAAGCGTCGAACTTTAGTCGGAGTAAAGGCAGCGGCGACGGCTTTGGTGGGGGAGGAGGAGAAGCGGGAGACAGCCACGGAGAACAAGAAGAAGAAACCTAGAGTTCTGGTGGCCGGAGGTGGAATCGGAGGTTTGGTGTTTGCTCTCACGGCGAAGAAGAAAGGGTTCGATGTGTTGGTGTTCGAGAAGGATCTGAGCGCTATAAGAGGAGAAGGACAATACAGAGGACCGATTCAAATACAGAGCAACGCTTTA…
>Schpar_CM001188.1_FGenesh1091.1
ATGGGTTCAACTCCGTTTTGCTATTCAATCAATCCTTCTCCATCAAAGCTCGACTTCACGAAGACCCATGGGTTTAGTCCTGTTGCTAAGCAGTTCTATTTAGATTTATCATCGTTTGCCGGGAAATCGGGTGGAGGATTATTGGGGTTCAGGAACCGTCGTGCCGTGGTCAGAGTAAAGGCAGCGACGGCGTTGGTGGAGGAGGAGAACCGGGAGACAGTGACGGTGAAGAAGAAATCGAGGGTTCTAGTGGCCGGAGGTGGAATCGGAGGTTTGGTATTTGCTCTTGCGGCGAAGAAGAAAGGATTCGATGTGTTGGTGTTCGAGAAGGATTTGAGCGCCATAAGAGGAGAAGGACAATATAGAGGTCCGATTCAAATACAGAGCAACGCTTTGGCT…
>ArathaSHA_ATSHA-5G92230.1
ATGGGTTCAACTCCGTTTTGCTATTCGATCAATCCATCTCCATCAAAGCTTGATTTCACAAGGACCCATGTGTTTAGTCCCGTTGCTAAACAGTTTTACTTAGATTTATCATCGTTTTCCGGAAGATCCGGAGGAGGATTATCCGTGTTTAGGAGCCGGAAAACTTTGCTCGGAGTAAAGGCGGCGACGGCGTTAGTTGAGAAGGAGGAGAAGAGAGAGGCGGTGACGGAGAAGAAGAAGAAATCGAGGGTTTTAGTTGCCGGAGGTGGAATCGGAGGATTGGTGTTTGCTTTAGCGGCTAAGAAGAAAGGATTCGATGTGTTAGTGTTTGAGAAAGATTTGAGTGCTATAAGAGGAGAAGGAAAATACAGAGGCCCGATTCAAATACAGAGCAACGCT…
>Sisiri_KE154866.1_FGenesh237.1
ATGGGTTCAACTCCGTTTTGCTATTCAATCAACCCATCTCCATCTAAGCTCGATTTCACGAGGACCCATGTGTTGACTCCCGTCGCTAAACAGTTCTACTTAGACTTATCTTCCTTTGCCGGAAAATCCGGTGGAGGGTCGTCGGGTTTTAGGAGCCGTCGGAATTCTGTCGGAGTAAAGGCGGCGACGGCGTTGGTGGAGGAGGAGAAGCGGGAGACAGTTCCGGAGAAGAAGAAACCGAGGGTTCTGGTGGCCGGAGGTGGAATCGGAGGTTTGGTGTTTGCTCTTGCGGCGAAGAAGAAAGGGTTCGATGTTGTGGTGTTCGAGAAGGACTTGAGCGCCATTAGAGGAGAAGGACAGTACAGAGGTCCGATTCAGATACAGAGCAACGCTTTGGCT…
>Thlarv_Thlar.0004s0138.1
ATGGGTTCAACTCCGTTTTGCTATTCAATCAACCCAAATCCATCAAAGCTTGATTTCACGAGGACCCATGTGTTTAGTCCCGCTGCCAAACAGTTCTATTTAGATTTATCATCGTTTGCCGGCAAAACAGGGGGAGGATTATCGGGGATTAGGAGTCGTCGAGCTTTGGTCGGAGTAAAGGCGGAGACGGCGTTGGTGGAGGGTGAGAAGCGGGAGACGGTGACGGAGAAGAAGAAATCGAGGGTTTTGGTGGCCGGAGGTGGAATCGGAGGTTTGGTGTTTGCTCTTGCGGCGAAGAAGAAAGGGTTCGATGTGTTGGTGTTCGAGAAGGATTTGAGCGCCATAAGAGGAGAAGGACAGTACAGAGGTCCGATTCAAATACAGAGCAACGCTTTGGCT…

## Sheet: Eny
Back to index
>Aetara_KE150890.1_FGenesh31.1
ATGCCGGTTGATTTAGATAATTCCTCCACAGTTTCCGGCGATGCAAGTGTTTCATCGACCGGAAATCAAAATCCACCGCCGAAATCCGCCGTTAAGAAGAAACGGAATCTCCCTGGAATGCCAGATCCAGAAGCTGAAGTGATAGCTTTATCTCCTAAAACCCTAATGGCAACAAACAGATTTGTCTGCGAAATCTGCAACAAGGGTTTTCAACGAGACCAAAATCTACAACTTCATCGTCGAGGTCACAATCTTCCATGGAAACTTCGACAAAGATCAAGTAAAGAAGTGAGAAAGAAAGTGTATGTATGTCCTGAAGTAGGTTGTGTTCATCATGAACCATCAAGAGCACTTGGAGATCTAACTGGAATCAAGAAACATTTTTGTCGAAAACATGGA…
>Arahal_Araha.20259s0002.1
ATGCCGGTTGATTTAGATAATTCCTCTACAGTTTCCGGCGATGCAAGCGTCTCATCGACCGGAAACCAAAATCAAACTCCCAAATCCGTCGGGAAGAAGAAACGGAATCTTCCCGGAATGCCTGATCCAGACGCGGAAGTGATAGCTTTGTCACCTAAAACACTTATGGCAACGAATCGATTCGTTTGCGAAATCTGTAACAAAGGTTTTCAACGTGACCAGAATCTTCAGCTTCATCGTCGTGGTCACAATCTTCCATGGAAACTTAGACAGAGATCGAGTAAAGAAGTGAGGAAGAAGGTTTATGTTTGTCCTGTTTCTGGTTGTGTTCATCATGACCCGTCACGTGCTCTTGGAGATCTTACTGGAATCAAGAAACACTTTTGTCGGAAACACGGT…
>Aralyr_AL8G44740.t1
ATGCCGGTTGATTTAGATAATTCCTCTACAGTTTCCGGCGATGCAAGCGTCTCATCGACCGGAAACCAAAATCAAACTCCCAAATCCGTCGGGAAGAAGAAACGGAATCTTCCCGGAATGCCTGATCCAGACGCGGAAGTGATAGCTTTGTCACCTAAAACACTTATGGCAACGAATCGATTCGTTTGCGAAATCTGTAACAAAGGTTTTCAACGTGACCAGAATCTTCAGCTTCATCGTCGTGGTCACAATCTTCCATGGAAACTTAGACAGAGATCGAGTAAAGAAGTGAGGAAGAAGGTTTATGTTTGTCCTGTTTCTGGCTGTGTTCATCATGACCCGTCACGTGCTCTTGGAGATCTTACGGGAATCAAGAAACACTTTTGTCGGAAACACGGT…
>Araalp_lcl_CM002876.1_KFK28353.1_20438
ATGCCTGTTGATTTAGATAACTCCTCCACAGTTTCCGGCGATGTAAGCGTTTCATCGACCGGAAACCAAAACCCACCTCCCAAGAAGAAACGTAATCTCCCTGGAATGCCTGATCCAGAAGCGGAAGTGATAGCTTTATCACCTAAGACTCTTATGGCAACAAACAGATTCGTTTGTGAAATCTGTAACAAAGGATTTCAAAGAGATCAGAATCTACAACTACATCGTCGTGGTCATAATCTACCATGGAAACTAAGACAAAGATCAAGTAAAGAAGTGAGGAAGAAAGTTTATGTTTGTCCTGTTTCAGGATGTGTTCATCATGAACCTTCACGAGCTTTAGGAGATTTAACTGGAATCAAGAAACACTTTTGTCGGAAACATGGTGAGAAGAAGTGG…
>ArathaCOL_AT5G66730.1
ATGCCGGTTGATTTAGATAATTCCTCTACAGTTTCCGGCGATGCAAGCGTCTCATCGACCGGAAACCAAAATCTAACTCCTAAATCCGTCGGGAAGAAGAAACGGAATCTTCCTGGAATGCCTGATCCAGACGCTGAAGTGATAGCTTTGTCACCTAAAACACTTATGGCAACGAATCGATTCGTTTGCGAAATCTGTAACAAAGGTTTTCAACGTGACCAGAATCTTCAGCTTCATCGTCGTGGTCACAATCTTCCATGGAAACTTCGACAGAGATCGACTAAAGAAGTGAGGAAGAAGGTTTATGTTTGTCCTGTTTCTGGCTGTGTTCATCATGACCCTTCACGTGCTCTTGGAGATCTTACTGGAATCAAGAAACACTTTTGTCGGAAACACGGC…
>Bislae_OVAU01018446.1_FGenesh1.1
ATGGCAACAAATCAATTCGTGTGCGAAATCTACAACAAATATTTTCAACGTGACCAGAATCTTCAGCTACGTCGTCGTGGTCATAATCTACCCTGGAAACTTCGACAGAGATCGATTAAAGAAGTGAAGAAGAAAGTCTATGTTTGTCTAGTTTTAGGTGGTGTTCATATTGAACCTTCACGTGTTCTTGGAGATCTAATAGGAATCAAAAAGCACTATTATTGGAAACACAATCTCCAAGAGCACGTGAAGGTTCGATATGAACACCGCCTAAAACTGGACAAACATAGACTTTCTTCTTCACTTCTTTACTCGATCTTTGTTGAAGTTTCCAGGGTAGATTATGATCAAGACGACGTAGTTGAAGATTATGGTCACATTGAAAATCTCGCACGCGAA…
>Bislae_OVAU01028503.1_FGenesh1.1
ATGCCGGTTGATTTAGATAACTCCTCTACAGTTTCCGGTGATGCAAGCGTTTCTTCCACCGGAAACCAAACTCCGCCGACGAAATCCGTCGGGAAGAAGAAACGGAATCTCCCCGGAATGCCAGATCCAGAAGCTGAAGTGATAGCTTTATCACCTAATACACTTCTAGCAACGAATCGATTCGTTTGCGAAATCTGCAACAAAGGATTTCAACGAGACCAGAATCTTCAACTTCATCGTCGTGGACATAATCTACCATGGAAACTTCGTCAAAGATCGACTTTGGCTGAAGAGAGTGCCAAAAATCCAGAAACAGTTGCTAAGAAGAAGAATCCAGTTTCTATTCAGAAATCTCAAACCGTTGCTGATTCTCCTCCTCCGCCACAGCCACAGCCTCCT…
>Braole_Parent=BolC2t12543H;Name=BolC2t12543H
ATGCCGGTAGATTTAGATAATTCATCAACGGTTTCCGGGGATGCAAGAAGCGTCTCGTCCACCGGAAACCAAAACCATAATAAACCTCCTAAGAAGAAACGGAACCTCCCCGGAATGCCTGATCCAGAAGCGGAGGTGATAGCTTTGTCACCCAAAACTCTGATGGCAACGAACCGATTCGTCTGCGAAATCTGCAAGAAAGGCTTTCAACGAGACCAGAACCTCCAGCTCCACCGTCGTGGTCACAACCTACCCTGGAAGCTTCGGCAGAGATCGAGCAAGGAAGTGAGGAAGAAAGTCTATGTCTGTCCTGTGTCCGGCTGTGTTCACCACGACCCTGCGCGTGCTCTCGGAGATCTCACTGGGATCAAGAAACACTTTTGTCGGAAACACGGCGAC…
>Braole_Parent=BolC9t54054H;Name=BolC9t54054H
AAGAGAGAGAGAGAGAGACTAAACAGAGTAGGAGGAAAGAGAGAGAAGGACCGAAGCTCGTGTCTTTTCCACATGCCGGTTGATTTAGATGATTCCTCCACGGTTTCCGAAGACGCAAGCGTCTCCTCCACCGGAAACCAAAACCCACCTCCACAATCCGCCGTGAAGAAGAAACGTAACCTCCCCGGAATGCCTGATCCAGATTCAGAGGTGATAGCTCTGTCACCCAAAACTCTCATGGCAACAAACCGATTCGTATGCGAAATCTGCAGCAAAGGCTTTCAGCGAGACCAGAACCTCCAGCTTCACCGTCGCGGTCACAACCTACCCTGGAAGCTTCGACAGAGATCGAGCAAAGAAGTGAGGAAGAAAGTCTACGTTTGTCCTGTCTCTGGCTGC…
>Brajun_BjuA045645
ATGCCGCCGGTTGATTTAGATAATTCATCCGGGGATGCAAGAAGCGTCTCACGGAACCTCCCCGGAATGCCTGATCCAGAAGCGGAGGTGATAGCCTTGTCACCCAAAACTCTGATGGCAAAGAACCGATTCGTGTGCGAAATCTGCAACAAAGGCTTTCAACGAGACCAGAACCTCCAGCTCCACCGTCGTGGTCCGAAACAGACAACGCTTGACTTTTTAGGTTTGGGAAGAGCTGTTGGTAATGGAAGTAGTAACCCCGGTGGAGGGTTGTCGGCTCTGTTTGGGACGGCGGGGGAGTTTTCAGGCAAAGACATTGGTAGAACAAGTTCCTAA
>Brajun_BjuA032780
ATGCCGGTTGATTTAGATGATTCCTCTACGGTTTCCGGTGACGCAAGCGTCTCCTCCACCGGAAACCAAAACCCACCTCCACAATCCGCCGTGAAGAAGAAACGTAACCTCCCCGGAATGCCTGATCCAGATTCAGAGGTGATAGCTCTCTCACCCAAAACTCTCATGGCGACGAACCGATTCGTCTGCGAAATCTGCAGCAAAGGGTTTCAGCGAGACCAGAACCTCCAGCTTCACCGTCGCGGTCACAACCTACCCTGGAAGCTTCGACAGAGATCGAGCAAAGAAGTGAGGAAGAAAGTCTACGTTTGTCCTGTCTCCGGCTGTGTTCATCACGACCCTTCGCGTGCCCTTGGCGATCTCACTGGGATCAAGAAACACTTTTGTCGGAAACACGGG…
>Brajun_BjuB039501
ATGCCGGTTGAATTAGATGATTCCTCTACGGTTTCCGGCGATGCAAGCGTCTCCTCCACCGGAAACCAAAACCCACCTCCGAAGCCCGCCGGGAAGAAGAAGCGGAATCTCCCCGGAATGCCTGATCCAGACTCGGAGGTGATAGCTCTGTCACCCAAAACTCTCATGGCAACAAACCGATTCGTCTGCGAAATCTGCAGCAAAGGCTTTCAGCGAGACCAGAACCTCCAGCTTCACCGTCGTGGTCACAACCTTCCCTGGAAGCTCCGTCAGAGATCGAGCAAAGAAGTGAGGAAGAAAGTCTATGTCTGTCCTGTCTCTGGCTGTGTTCATCACGACCCCTCACGTGCTCTCGGTGATCTCACCGGGATCAAGAAACACTTCTGTCGGAAACACGGC…
>Brajun_BjuO008469
ATGCCGGTTGATAGAGAAAATTCATCAACGGTTTCCGGGGATGCAAGCGTCGTCTCCTCCACCGGAAACCAAAACCCACCACCTCCCAAGAAGAAACGCAACCTCCCCGGAATGCCTGCCGCCTCTCCTCTTACTCCACCTCCTACTTCTCCGCCGTCGGTTGCTCTCCCTACCAAAATCGCATCTCCCTCGGTTTTGCCGGTTCCGAGTTCTTCAGAATCTCCTCAAGACAACCCTCTTGAAGTCATCATGGAAGAAGAAGCGATCGGTTTCAATGTGAGCTCATCAGGAGGTATAAGCGGTGATCATACTAGTAACAGCAACGGCACACCAAGAACGTTGGGTTTCAACATGAGCTCATCTGTGGGTATAAGCGGTGATCATACTAGTAACAACAAC…
>Branig_CM004491.1_FGenesh5823.1
ATGCCGGTCGAATTAGATGATTCCTCTACGGTTTCCGGCGATGCAAGCGTCTCCTCCACCGGAAACCAAAACCCACCTCCGAAGCCCGCCGGGAAGAAGAAGCGGAACCTCCCCGGAATGCCTGATCCAGACTCGGAGGTGATAGCTTTGTCACCCAAAACTCTCATGGCAACAAACAGATTCGTCTGCGAAATCTGCAGCAAAGGCTTTCAGCGAGACCAGAACCTCCAGCTTCACCGTCGCGGTCACAACCTTCCGTGGAAGCTCCGACAGAGATCGAGCAAAGAAGTGAGGAAGAAAGTCTATGTCTGTCCTGTCTCTGGCTGTGTTCATCACGACCCGTCACGTGCTCTCGGTGATCTCACCGGGATCAAGAAACACTTCTGTCGGAAACACGGC…
>Branig_CM004494.1_FGenesh3088.1
ATGCCGGTTGATAGAGAAAATTCATCAACGGTTTCCGGGGATGCAAGCGTCGTCTCCTCCACCGGAAACCAAAACCCACCACCTCCCAAGAAGAAACGCAACCTCCCCGGAATGCCTGATCCAGGGGCGGAAGTGATAGCTTTGTCACCTAAAACTCTGATGGCAACAAACAGGTTCGTCTGCGAAATCTGCAGCAAAGGGTTTCAGCGAGACCAGAATCTCCAGCTTCACCGTCGTGGTCACAACCTTCCCTGGAAGCTTCGTCAGAGATCGAGCAAAGAAGTGAGGAAGAAAGTGTATGTCTGTCCTGTCTCCGGCTGTGTTCATCACGACCCTTCACGTGCTCTTGGTGATCTCACTGGTATCAAGAAACACTTTTGTCGGAAACACGGCGAGAAG…
>Brarap_Parent=BraA02t09359Z;Name=BraA02t09359Z
ATGCCGCCGGTTGATTTAGATAATTCATCCGGGGATGCAAGAAGCGTCTCACGGAACCTCCCCGGAATGCCTGATCCAGAAGCGGAGGTGATAGCCTTGTCACCCAAAACTCTGATGGCAAAGAACCGATTCGTGTGCGAAATCTGCAACAAAGGCTTTCAACGAGACCAGAACCTCCAGCTCCACCGTCGTGGTCCGAAACAGACAACGCTTGACTTTTTAGGTTTGGGAAGAGCTGTTGGTAATGGAAGTAGTAACCCCGGTGGAGGGTTGTCGGCTCTGTTTGGGACGGCGGGGGAGTTTTCAGGCAAAGACATTGGTAGAACAAGTTCCTAA
>Brarap_Parent=BraA09t36628Z;Name=BraA09t36628Z
ATGCCGGTTGATTTAGATGATTCCTCTACGGTTTCCGGTGACGCAAGCGTCTCCTCCACCGGAAACCAAAACCCACCTCCACAATCCGCCGTGAAGAAGAAACGTAACCTCCCCGGAATGCCTGATCCAGATTCAGAGGTGATAGCTCTCTCACCCAAAACTCTCATGGCGACGAACCGATTCGTCTGCGAAATCTGCAGCAAAGGGTTTCAGCGAGACCAGAACCTCCAGCTTCACCGTCGCGGTCACAACCTACCCTGGAAGCTTCGACAGAGATCGAGCAAAGAAGTGAGGAAGAAAGTCTACGTTTGTCCTGTCTCCGGCTGTGTTCATCACGACCCTTCGCGTGCCCTTGGCGATCTCACTGGGATCAAGAAACACTTTTGTCGGAAACACGGG…
>Branap_BnaA09g52630D
ATGCCGGTTGATTTAGATGATTCCTCTACGGTTTCCGGCGACGCAAGCGTCTCCTCCACCGGAAACCAAAACCCACCTCCACAATCCGCCGTGAAGAAGAAACGTAACCTCCCCGGAATGCCTGATCCAGATTCAGAGGTGATAGCTCTCTCACCCAAAACTCTCATGGCGACGAACCGATTCGTCTGCGAAATCTGCAGCAAAGGGTTTCAGCGAGACCAGAACCTCCAGCTCCACCGTCGCGGTCACAACCTACCCTGGAAGCTTCGGCAGAGATCGAGCAAAGAAGTGAGGAAGAAAGTCTACGTTTGTCCTGTCTCCGGCTGTGTTCATCACGACCCTTCGCGTGCTCTTGGTGATCTCACTGGGATCAAGAAACACTTTTGTCGGAAACACGGC…
>Branap_BnaCnng53120D
ATGCCGGTAGATTTAGATAATTCATCAACGGTTTCCGGGGATGCAAGAAGCGTCTCGTCCACCGGAAACCAAAACCATAAACCTCCTAAGAAGAAACGGAACCTCCCCGGAATGCCTGATCCAGGAGCGGAGGTGATAGCTTTGTCACCCAAAACTCTGATGGCGACGAACCGATTCGTCTGCGAAATCTGCAAGAAAGGCTTTCAACGAGACCAGAACCTCCAGCTCCACCGTCGTGGTCACAACCTACCCTGGAAGCTTCGGCAGAGATCGAGCAAGGAAGTGAGGAAGAAAGTCTATGTCTGTCCTGTGTCCGGCTGTGTTCACCACGACCCTTCGCGTGCTCTCGGAGATCTCACTGGGATCAAGAAACACTTTTGTCGGAAACACGGCGAGAAG…
>Branap_BnaC09g07830D
ATGCCGGTTGATTTAGATGATTCCTCCACGGTTTCCGGCGACGCAAGCGTCTCCTCCACCGGAAACCAAAACCCACCTCCACAATCCGCCGTGAAGAAGAAACGTAACCTCCCCGGAATGCCTGATCCAGATTCAGAGGTGATAGCTCTGTCACCCAAAACTCTCATGGCAACAAACCGATTCGTATGCGAAATCTGCAGCAAAGGCTTTCAGCGAGACCAGAACCTCCAGCTTCACCGTCGCGGTCACAACCTACCCTGGAAGCTTCGACAGAGATCGAGCAAAGAAGTGAGGAAGAAAGTCTACGTTTGTCCTGTCTCTGGCTGCGTTCATCACGACCCTTCGCGTGCCCTTGGTGATCTCACTGGGATCAAGAAACACTTTTGTCGGAAACACGGC…
>Boestr_Bostr.0568s0090.1
ATGCCGGTTGATTTAGATAATTCCTCTACAGTTTCCGGCGATGCAAGCGTCTCATCGACCGGAAACCAAAATCAAACTCCCAAATCCGTCGGGAAGAAGAAACGGAATCTTCCCGGAATGCCTGATCCAGACGCGGAAGTGATAGCTTTGTCACCTAAAACACTTATGGCAACGAATCGATTCGTTTGCGAAATCTGTAAAAAAGGTTTTCAACGCGACCAGAATCTTCAGCTTCATCGTCGTGGTCACAATCTTCCATGGAAACTTAGACAGAGATCGAGTAAAGAAGTGAGGAAGAAGGTTTATGTTTGTCCAGTTGCAGGCTGTGTTCATCATGACCCATCACGTGCTCTTGGAGATCTCACTGGAATCAAGAAACACTTTTGTCGGAAACACGGC…
>Capbur_MPGU01000148.1_FGenesh44.1
ATGCCCGTTTCATATTTCTGGACAAGCGTAATCAACGTGCGTGATAACAAACGGTGGATTCTTCAGAGAGAGAGACAAAGAATCAAAGCCGGAAGTACGGATAACTCGGCATCTCCGGTGGATTCTCAGCCGTTGGATCAGATCGAATCTCCAGGAAGCAACCCTCCTGAAGTCATCGTCGAGGAAGCTTCAAGAACAATCGGTTTCAATGTGAGCTCATCGGGTTTAAGCAACGATCACAGTAACAATAATGGTGCATACTCGGGCTTGTTTGTATCATCAACTGCTTCGCCTAGTTTATATGCTTCCTCAACCGCTTCTCCAAGTTTGTACGCACCATCTTCCTCCATCGAACCCATCTCTCTGTGTCTCTCGACGAACCCGTCTTTGTTCGGACGG…
>Capbur_MPGU01000788.1_FGenesh3.1
GCTTCTTCTCCGCCGTCGGTTGCTATAGCTCCGGCGCCGGCTATTTCGGTTGAGTCTGAGCCTGCCAAAGTCATATCTTCCTCGGTTTTGCCGAATCAGGATTCTCCAGAATCTCCAGGAAGCAACCCTCCTGAAGTCATCGTCGAGGAAGCTTCAAGAACAATCGGTTTCAATGTGAGCTCATCGGGTTTAAGCAACGATCACAGTAACAACAATGGTGCATACTCGGGCTTGTTTGTATCATCAACTGCTTCGCCTAGTTTATATGCTTCCTCAACCGCTTCTCCAAGTTTGTACGCACCATCTTCCTCCATCGAACCCATCTCTCTCTGTCTCTCGACGAACCCGTCTTTGTTCGGACGAACAATACAAGATCCGCCACATTTTCTAACTCCTCTT…
>Carhir_CARHR280990.1
ATGCCGGTTGATTTAGAGAACTCCTCCACGGTTTCCGGCGATGCAAGCGTCTCCTCCACCGGAAACCAAACTCCTAAATCCGTCGGAAAGAAGAAACGGAATCTTCCCGGAATGCCTGATCCAGAGGCTGAAGTGATAGCTTTGTCACCAAAAACACTAATGGCAACGAATCGATTCGTTTGCGAAATCTGTAACAAAGGTTTTCAACGTGACCAGAATCTTCAGCTTCATCGTCGTGGTCACAACCTACCATGGAAACTTAGACAGAGATCGAGTAAAGAAGTGAGGAAGAAAGTTTATGTTTGTCCGGTCTCAGGCTGTGTTCATCACGAGCCATCACGTGCTCTTGGAGATCTCACTGGAATCAAGAAACACTTTTGTCGGAAACACGGTGAGAAG…
>Capgra_Cagra.2007s0026.1
ATGCCGGTTGATTTAGATAACTCCTCTACAGTTTCCGGCGATGCAAGCGTCTCATCGACCGGGAACCAAAATCAAACTCCCAAATCCGTCGGGAAGAAGAAACGGAATCTTCCCGGAATGCCTGATCCAGACGCGGAAGTGATAGCTCTGTCACCTAAGACACTCATGGCGACGAATCGATTCGTCTGCGAAATCTGTAACAAAGGTTTTCAACGTGACCAGAATCTTCAGCTTCATCGTCGTGGTCACAATCTTCCATGGAAACTTCGACAGAGATCGAGTAAAGAAGTGAGGAAGAAGGTGTACGTTTGTCCAGTTGCAGGCTGTGTTCATCATGACCCGTCACGTGCTCTTGGAGATCTCACTGGAATCAAGAAACACTTTTGTCGGAAACACGGC…
>Capcru_Carub.0008s2777.1
ATGCCGGTTGATTTAGATAACTCCTCTACAGTTTCCGGCGATGCAAGCGTCTCATCGACCGGGAACCAAAATCAAACTCCCAAATCCGTCGGGAAGAAGAAACGGAATCTTCCCGGAATGCCTGATCCAGACGCGGAAGTGATAGCTCTGTCACCTAAGACACTCATGGCGACGAATCGATTCGTCTGCGAAATCTGTAACAAAGGTTTTCAACGTGACCAGAATCTTCAGCTTCATCGTCGTGGTCACAATCTTCCATGGAAACTTCGACAGAGATCGAGTAAAGAAGTGAAGAAGAAGGTGTACGTTTGTCCAGTTGCAGGCTGTGTTCATCATGACCCGTCACGTGCTCTTGGAGATCTCACTGGAATCAAGAAACACTTTTGTCGGAAACACGGC…
>Camsat_Csa11g104260.1
ATGCCGGTTGATTTAGATAACTCCTCTACAGTTTCCGGCGATGCGAGCGTCTCATCGACCGGAAACCAAAATCAAACTCCCAAATCCGTTGGGAAGAAGAAACGGAATCTTCCTGGAATGCCTGATCCAGACGCGGAAGTGATAGCTTTGTCACCCAAAACACTTATGGCGACGAACCGATTCGTTTGCGAAATCTGTAACAAAGGTTTCCAACGTGACCAGAATCTTCAGCTTCATCGTCGTGGTCACAATCTTCCATGGAAGCTTCGACAGAGATCGAGTAAAGAAGTGAGGAAGAAGGTTTACGTTTGTCCAGTTGCGGGTTGTGTTCATCATGAACCCTCGCGTGCTCTTGGAGATCTCACTGGTATCAAGAAACACTTTTGTCGGAAACACGGC…
>Camsat_Csa14382s010.1
ATGTCAGCTACCGCATTGCTCCAAAAAGCTGCCCAAATGGGTTCCACGGGATCAGGAGGGTCGTTGCTTCGCGGGTTAGGCATAGTTTCAACCACTTCTTCATCGATGGAACTCAGCAATCACGATGCCTTGTCCTTAGCTCCTGGTCTTGGACTTGGACTACCTTGTAGCAGCGGTGGTAGCGGATCAGGTCTAAAAGAGCTCATGATGGGGAACTCGTCGGTGTTTGGTCCAAAACAGACGACACTTGACTTCCTCGGATTAGGAAGAGCTGTT
>Camsat_Csa02g076040.1
ATGCCGGTTGATTTAGATAACTCCTCTACAGTTTCCGGCGATGCAAGCGTTTCATCGACCGGAAACCAAAATCAAACTCCCAAATCCGTTGGGAAGAAGAAACGGAATCTTCCCGGAATGCCTGATCCAGACGCGGAAGTGATAGCTTTGTCACCCAAAACACTTATGGCAACGAACCGATTCGTTTGCGAAATCTGTAACAAAGGTTTCCAACGTGACCAGAATCTTCAGCTTCATCGTCGTGGTCACAATCTTCCATGGAAGCTTCGACAGAGATCGAGTAAAGAAGTTAGGAAGAAGGTATACGTTTGTCCAGTTGCGGGTTGTGTTCATCATGAACCGTCACGTGCTCTTGGAGATCTCACTGGTATCAAGAAACACTTTTGTCGGAAACACGGC…
>Camsat_Csa18g041860.1
ATGCCGGTTGATTTAGATAACTCCTCTACAGTTTCCGGCGATGCGAGCGTCTCATCGACCGGAAACCAAAATCAAACTCCCAAATCCGTTGGGAAGAAGAAACGGAATCTTCCTGGAATGCCTGATCCAGACGCGGAAGTGATAGCTTTGTCACCCAAAACACTTATGGCGACGAACCGATTCGTTTGCGAAATCTGTAACAAAGGTTTCCAACGTGACCAGAATCTTCAGCTTCATCGTCGTGGTCACAATCTTCCTTGGAAGCTTCGACAGAGATCGAGTAAAGAAGTGAGGAAGAAGGTTTACGTTTGTCCAGTTGCGGGTTGTGTTCATCATGAACCCTCACGTGCTCTTGGAGATCTCACTGGTATCAAGAAACACTTTTGTCGGAAACACGGC…
>Dipstr_Distr.0003s0399.1
ATGCCGGTTGATTTAGATAATTCCTCTACCGTTTCCGGCGATGCAAGTGTTACTACTTCATCGACCGGAAATCAAATTCCGGCTTCGAAATCCGTCGGAAAAAAGAAACGGAATCTCCCCGGAATGCCTGATCCAGATGCAGAAGTGATAGCTTTATCACCAAACACATTAATGGCAACGAACCGATTCGTCTGCGAAATCTGCAACAAAGGTTTTCAAAGAGACCAGAATCTTCAGCTACATCGTCGTGGACACAATCTACCATGGAAACTCCGACAAAGATCAAGCAAAGATGTGGTAAAGAAGAAAGTCTATGTTTGTCCTGTCTCTGGTTGTGTTCATCACGAGCCTTCCCGAGCTCTAGGCGATCTCACTGGAATCAAGAAACACTTTTGTCGT…
>Eutesa_Thhalv10004063m
ATGCCGGTTGATTTAGATAACTCCTCTACGGTTTCCGGCGATGCAAGCGTCTCGTCGACCGGAAACCAAAACCATCCTCCGAAATCGGTCGGGAAAAAGAAACGGAATCTCCCGGGAATGCCAGATCCAGACGCGGAAGTGATAGCCTTGTCACCTAAAACTCTTATGGCAACAAACCGATTTGTCTGCGAAATCTGCAACAAAGGGTTTCAACGCGACCAGAATCTTCAGCTTCATCGTCGTGGTCACAATCTACCATGGAAACTTCGACAGAGATCGAGTAAAGAAGTGAGGAAGAAGGTCTATGTTTGTCCAGTGGCAGGGTGTGTTCATCACGACCCGTTACGTGCTCTTGGAGATCTCACTGGAATCAAGAAGCACTTTTGTCGGAAACACGGC…
>Eruves_Eruve.1486s0004.1
ATGCCGGTCGATTTGGATAATTCCTCCACGGTCTCCGGCGATGCAAGCGTCTCTTCAACGGGAAACCAAAACCCACCACCGAAGAAGAAACGGAGTCTCCCCGGAATGCCTGATCCAGACGCGGAAGTGATAGCTTTATCACCGAAAACACTGATGGCAACAAACAGATTCGTATGCGAAATCTGCAACAAAGGGTTTCAACGAGACCAGAATCTCCAGCTTCACCGTCGTGGTCACAACTTACCCTGGAAGCTTAGACAGAGATCGAGTAAAGAAGTGAGGAAGAAAGTGTATGTCTGTCCTGTGGCGGGATGTGTTCATCACGACCCGTCACGTGCTCTTGGAGATCTCACTGGGATCAAGAAACACTTTTGTCGGAAACACGGCGAGAAGAAGTAT…
>Eruves_Eruve.4311s0004.1
ATGCCGGTTGAATTAGATGACTCCTCTACTGTTTCCGGCGACGCAAGCGTGTCGTCTTCTACCGGAAACCAAAACCAAAACCCAACTCCACAATCCGTCGTGAAGAAGAAACGGAACCTCCCAGGAATGCCTGATCCAGACGCAGAGGTGATAGCTTTATCACCCAAAACTCTAATGGCAACAAACAGATTCGTCTGCGAAATCTGCAGCAAAGGGTTTCAACGAGACCAGAATCTTCAGCTCCACCGTCGCGGTCACAACCTTCCGTGGAAGCTCCGACAGAGAACGAGTAAAGAAGTGAGGAAGAAAGTGTACGTTTGTCCTGTGTCGGGGTGTGTTCATCACGACCCGTCACGTGCTCTTGGAGATTTAACTGGGATCAAGAAACACTTTTGTCGG…
>Isatin_Isati.26123s0001.1
ATGCCGGTTGATTTAGATAATTCCTCTACGGTTTCCGGCGATGCAAGCGTCTCGTCGACCGGAAACCAAAACCCACCTCCGAAACCTGTCGGGAAGAAGAAACGGAATCTCCCCGGAATGCCTGATCCAGACGCGGAAGTGATAGCTTTGTCACCTAAAACTCTTATGGCAACGAACCGATTCGTCTGCGAAATCTGCAACAAAGGGTTTCAACGGGACCAGAATCTTCAGCTTCACCGCCGTGGTCACAACCTACCATGGAAACTTCGACAGAGATCGAGCAAAGAAGTGAGGAAGAAAGTCTATGTTTGTCCAGTTGCAGGCTGTGTTCATCACGACCCGTCACGTGCTCTTGGAGATCTCACTGGAATCAAGAAGCACTTTTGTCGGAAGCACGGC…
>Isatin_Isati.1195s0019.1
ATGCCGGTTGATTTAGATAATTCCTCTACGGTTTCCGGCGATGCAAGCGTCTCGTCGACCGGAAACCAAAACCCACCTCCGAAACCTGTCGGGAAGAAGAAACGGAATCTCCCCGGAATGCCTGATCCAGACGCGGAAGTGATAGCTTTGTCACCTAAAACTCTTATGGCAACAAACCGATTCGTCTGCGAAATCTGCAACAAAGGGTTTCAACGGGACCAAAATCTTCAGCTTCACCGCCGTGGTCACAACCTACCATGGAAACTTCGACAGAGATCGAGTAAAGAAGTGAGGAAGAAAGTCTATGTTTGTCCAGTTGCAGGCTGTGTTCATCACGACCCGTCACGTGCTCTTGGAGATCTCACTGGAATCAAGAAGCACTTTTGTCGGAAGCACGGC…
>Isatin_Isati.0097s0040.1
ATGCCGGTTGATTTAGATAATTCCTCTACGGTTTCCGGCGATGCAAGCGTCTCGTCGACCGGAAACCAAAACCCACCTCCGAAACCCGTCGGGAAGAAGAAACGGAATCTCCCTGGAATGCCTGATCCAGACGCGGAAGTGATAGCTTTGTCACCTAAAACTCTTATGGCAACGAACCGATTCGTCTGCGAAATCTGCAACAAAGGGTTTCAACGGGACCAGAATCTCCAGCTTCACCGTCGTGGTCACAACCTACCATGGAAACTTCGACAGAGATCGAGTAAAGAAGTGAGGAAGAAAGTCTATGTTTGTCCAGTTGCAGGCTGTGTTCATCACGACCCGTCACGTGCTCTTGGAGATCTCACTGGAATCAAGAAGCACTTTTGTCGGAAACACGGC…
>Lunann_Luann.0136s0125.1
ATGCCGGTTGATTTAGATAATTCCTCTACGGTTTCCGGCGATGCAAGTGTCTCGTCGAGTGGAAACCAAAATCCACCTCCCAAATCTGTTGGGAAGAAGAAACGGAATCTTCCCGGAATGCCTGATCCAGACGCGGAAGTGATAGCTTTGTCACCTAAAACTCTTATGGCAACGAATCGATTCGTCTGTGAAATCTGCAATAAAGGTTTTCAACGAGACCAGAATCTTCAGCTCCATCGTCGTGGTCACAATCTACCATGGAAACTCCGACAGAGATCGAGTAAAGAAGTGAGGAAGAAAGTCTATGTTTGTCCAGTGGCGGGTTGTGTTCATCACGACCCGTCACGTGCTCTTGGAGATCTCACCGGAATCAAGAAACACTTTTGTCGGAAACACGGC…
>Lunann_Luann.0076s0022.1
ATGCCGGTTGATTTAGATAATTCCTCTACGGTTTCCGGCGATGCAAGCGTTTCGTCGACCGGAAACCAAAATCAACTTCCGAAATCCGTCGGGAAGAAGAAACGGAATCTCCCCGGAATGCCTGATCCAGACGCGGAAGTTATAGCCTTATCACCTAAAACTCTTATGGCAACGAACCGATTCGTTTGCGAAATCTGCAACAAAGGTTTTCAACGAGACCAGAATCTTCAGCTCCACCGTCGTGGTCACAATCTTCCATGGAAACTCAGACAGAGATCGAGCAAAGAAGTGAGGAAGAAAGTCTATGTTTGTCCGGTGGCAGGCTGTGTTCATAACGACCCGTCACGCGCTTTAGGCGATCTCACTGGAATCAAGAAACACTTTTGTCGGAAACACGGG…
>Leaala_KE157025.1_FGenesh5.1
ATGCCCGTTGATTTAGATAACTCCTCTACAGTTTCCGGTGATGCAAGCGTCTCTTCCACCGGAAACCAAAACCCAACTCCTAAATCCGTCGTTAAGAAGAAACGGAATCTCCCCGGAATGCCTGATCCAGACGCAGAAGTAATAGCTTTGTCACCTAAAACACTAATGGCAACGAATCGATTCGTTTGTGAAATCTGTAACAAAGGTTTTCAACGTGACCAGAATCTTCAGCTACATCGTCGTGGTCATAATCTACCATGGAAACTTAGACAGAGATCAAGTAAAGAAGTGAGGAAGAAAGTTTATGTTTGTCCAGTGGAAGGTTGTGTTCATCATGATCCATCACGTGCTCTTGGAGATCTCACTGGTATCAAGAAACACTTTTGTCGGAAACACGGT…
>Lepsat_Lesat.1029s0073.1
ATGCCTGTTGATTTAGATAATTCCTCTACGGTTTCCGGCGATGCAAGTGTTTTATCGACCGGAAATCAGACTGCAACTCCGAAATCTGTTGGGAAGAAGAAACGGAATCTCCCTGGAATGCCTGATCCAGAAGCTGAAGTGATAGCTTTATCACCCAAAACACTTATGGCAACGAATAGATTCGTGTGTGAAATCTGCAACAAAGGTTTTCAACGCGACCAAAATCTTCAGCTCCATCGTCGTGGTCATAATCTACCATGGAAACTTAGACAGAGATCGAGTAAAGAAGTGAGGAAGAAGGTTTATGTTTGTCCAGTGGAAGGCTGTGTTCATCACGACCCTTCACGTGCGCTTGGAGATCTCACTGGAATTAAGAAACACTTTTGTAGGAAACATGGC…
>Lepsat_Lesat.0284s0075.1
ATGCCTGTTGATTTAGATAATTCCTCTACGGTTTCCGGCGATGCAAGTGTTTCATCGACCGGAAATCAAACTCCGACTCCGAAATCTGTTGGGAAGAAGAAACGAAATCTCCCTGGAATGCCTGATCCAGAAGCTGAAGTGATAGCTTTGTCACCTAAAACACTTATGGCAACGAATAGATTCGTGTGTGAAATCTGCAACAAAGGTTTTCAACGCGACCAAAATCTTCAACTCCATCGTCGTGGTCATAATCTACCATGGAAACTTAGACAGAGATCGAGTAAAGAAGTGAGGAAGAAGGTGTATGTTTGTCCAGTGGAAGGCTGTGTTCATCACGAGCCTTCACGTGCTCTTGGAGATCTCACTGGAATTAAGAAACACTTTTGTAGGAAACATGGT…
>Noccae_OVBC01000616.1_FGenesh9.1
ATGCCGGTTGATTTAGATAATTCCTCCACGGTTTCCGGCGATGCAAGCGTCTCGTCGACCGGAAACCAGAACCCACCTCCAAAACCTGTCGGGAAGAAGAAGCGAAACCTTCCCGGAATGCCTGATCCAGACGCAGAAGTGATAGCTTTGTCTCCTAAGACTCTTATGGCAACGAATCGATTCGTCTGCGAAATCTGCAACAAGGGTTTCCAACGAGACCAGAATCTGCAGCTTCATCGTCGTGGCCACAATCTACCGTGGAAACTCAGACAGAGATCGAGTAAAGAAGTGAGGAAGAAGGTCTACGTTTGTCCAGTGGCAGGCTGTGTCCATAACGAACCGTCACGCGCTTTAGGAGATCTTACCGGAATCAAGAAACACTTTTGTCGGAAACACGGC…
>Rorisl_Roisl.0024s0602.1
ATGCCGGTCGATTTAGATAATTCCTCTACGGTTTCCGGCGATGCAAGCGTCTCGTCCACCGGAAACCAAAATCAAACTCCTAAATCCGTCGGAAAGAAGAAACGGAATCTTCCCGGAATGCCTGATCCAGAAGCGGAAGTGATAGCTTTGTCACCTAAAACACTTATGGCAACGAATAGATTCGTTTGTGAAATCTGTAACAAAGGTTTTCAACGGGACCAGAATCTTCAGCTTCATCGTCGTGGTCACAATCTACCATGGAAACTTAGACAGAGATCGAGTAAAGAAGTGAGGAAGAAAGTTTATGTTTGTCCAGTTGCAGGTTGTGTTCATCACGAGCCATCACGTGCTCTTGGAGATCTCACTGGAATCAAGAAACACTTTTGTCGGAAACACGGT…
>Rapsat_Rsa1.0_00176.1_g00014.1
ATGCCGGTTGAATTAGATGATTACTCAACGGTTTCCGGCGATGCAAGCGTCTCCTCGACCGGAAACCAAAACCAAAACACACCTGCTCCACAATCCCTCTCCAAGAAGAAACGTAACCTCCCCGGAATGCCTGATCCAGAAGCGGAGGTGATAGCTTTGTCACCAAAAACTCTCATGGCGACAAACAGATTCGTATGCGAAATCTGCAGCAAAGGGTTTCAGCGAGACCAGAACCTCCAGCTTCACCGTCGCGGTCACAACTTACCCTGGAAGCTTCGTCAGAGATCGAGCAAAGAAGTGAAGAAGAAAGTCTATGTTTGTCCTGTCTCTGGCTGTGTTCATCACGAACCCTCACGTGCTCTTGGGGATCTAACGGGGATCAAGAAACACTTTTGTCGG…
>Rapsat_Rsa1.0_00261.1_g00005.1
ATGGCACCGGTTGAATTAGAGAACTCATCAACGGTTTCAGGGGATGCAAGCGGCGTCTCCTCCACCGGAAACCTAAACCCACCTCCCAAGAAGAAACGTAACCTCCCCGGAATGCCTGATCCAGGGGCGGAAGTGATAGCTTTGTCACCAAAAACACTTATGGCAACGAACCGATTCGTCTGCGAAATCTGCAACAAAGGCTTTCAACGCGACCAGAACCTCCAGCTCCACCGCCGCGGTCACAACCTCCCCTGGAAGCTTCGTCAGAGATCCGCCAAAGACGCTGTGAGGAAGAAAGTCTACGTCTGTCCTGTCTCCGCCTGCGTTCACCACGACCCTTCACGTGCTCTCGGCGATCTCACCGGCATCAAGAAACACTTTTGTCGGAAACACGGCGAG…
>Sinalb_Sialb.0205s0048.1
ATGCCGGTTGATTTAGATGATTCCTCTACGGTTTCCGGCGATGCAAGCGTCTCCTCCACCGGAAACCAAAACCCACCTCCACAATCCGTCGTGAAGAAGAAACGGAACCTCCCAGGAATGCCTGATCCAGATGCGGAGGTGATAGCTTTATCACCCAAAACTCTTATGGCAACAAACAGATTCGTCTGCGAAATCTGCAGCAAAGGGTTTCAACGAGACCAGAACCTCCAGCTTCACCGTCGTGGTCACAACCTTCCATGGAAGCTTCGACAGAGATCGAGCAAAGAAGTGAGGAAGAAAGTCTATGTTTGTCCTGTGTCAGGCTGTGTTCATCACGACCCCTCACGTGCTCTTGGTGATCTCACTGGAATCAAGAAACACTTTTGTCGGAAACACGGC…
>Sinalb_Sialb.1343s0004.1
ATGCCTCCGGTTGATTTAGATAATTCATCAACGGTTTCCGGGGGGGATGCAAGCGTCTCCTCCTCCACCGGAAACCAAAACCCACCTCCCAAGAAGAAACGGAACCTCCCCGGAATGCCTGATCCAGGCGCGGAAGTGATAGCTTTGTCACCTAAAACGCTCATGGCAACAAACAGGTTCGTGTGCGAAATCTGCAGCAAAGGGTTTCAACGAGACCAGAATCTCCAGCTTCACCGTCGTGGTCACAACCTGCCCTGGAAGCTCCGTCAGAGATCGAGCAAAGAAGAAGTAAGGAAGAAAGTGTACGTTTGTCCTGTGGCTGGCTGTGTTCATCACGACCCCGCACGTGCTCTTGGTGATCTCACTGGAATCAAGAAACACTTTTGTCGGAAACACGGC…
>Schpar_CM001188.1_FGenesh1057.1
ATGCCGGTTGATTTAGATAATTCCTCTACGGTTTCCGGCGATGCAAGCGTCTCGTCGACCGGAAACCAAAACCCACCTCCGAAATCCGCCGGGAAGAAGAAACGGAATCTCCCCGGAATGCCTGATCCAGACGCGGAAGTGATAGCTTTGTCACCTAAAACTCTTATGGCAACAAACCGATTCGTCTGCGAGATCTGCAACAAAGGGTTTCAACGAGACCAGAATCTTCAGCTTCACCGTCGTGGTCACAATCTACCATGGAAACTTCGACAGAGATCGAGTAAAGAAGTGAGGAAGAAAGTCTATGTTTGTCCTGTGGCGGGCTGTGTTCATCACGACCCATCACGTGCTCTTGGAGATCTCACTGGAATCAAGAAACACTTTTGTCGGAAACACGGC…
>ArathaSHA_ATSHA-5G91880.1
ATGCCGGTTGATTTAGATAATTCCTCTACAGTTTCCGGCGATGCAAGCGTCTCATCGACCGGAAACCAAAATCTAACTCCTAAATCCGTCGGGAAGAAGAAACGGAATCTTCCTGGAATGCCTGATCCAGACGCTGAAGTGATAGCTTTGTCACCTAAAACACTTATGGCAACGAATCGATTCGTTTGCGAAATCTGTAACAAAGGTTTTCAACGTGACCAGAATCTTCAGCTTCATCGTCGTGGTCACAATCTTCCATGGAAACTTCGACAGAGATCGACTAAAGAAGTGAGGAAGAAGGTTTATGTTTGTCCTGTTTCTGGCTGTGTTCATCATGACCCTTCACGTGCTCTTGGAGATCTTACTGGAATCAAGAAACACTTTTGTCGGAAACACGGC…
>Sisiri_KE154866.1_FGenesh274.1
ATGCCGGTCGATTTAGATAATTCCTCTACTGTTTCCGGCGATGCAAGTGTCTCGTCGACCGGGAACCAAAACCCACCTCCCAAACCCGCCGGGAAGAAGAAACGGAATCTCCCCGGAATGCCTGATCCAGACGCGGAAGTGATAGCTTTGTCACCTAAAACACTTATGGCAACAAACAGATTCGTCTGCGAAATCTGCAACAAAGGGTTTCAGCGAGACCAGAATCTCCAGCTTCACCGTCGTGGTCACAACCTACCATGGAAACTTAGACAGAGGTCGAGTAAAGAAGTGAGGAAGAAAGTGTACGTTTGTCCAGTGGCAGGCTGTGTCCATCACGACCCGTCACGTGCTCTAGGAGATCTCACTGGAATCAAAAAACACTTTTGTCGGAAACACGGC…
>Thlarv_Thlar.0004s0103.1
ATGCCGGTTGATTTAGATAATTCCTCTACGGTTTCCGGCGATGCAAGCGTCTCGTCGACCGGAAACCAAAACCCACCTCCGAAATCCGCCGGGAAGAAGAAACGGAACCTCCCCGGAATGCCTGATCCAGACGCGGAAGTGATAGCTTTGTCACCTAAAACTCTTATGGCAACAAACCGATTCGTCTGCGAAATCTGCAACAAAGGGTTTCAACGCGACCAGAATCTTCAGCTTCATCGTCGTGGTCACAATCTACCATGGAAACTTCGACAGAGGTCGAGTAAAGAAGTGAGGAAGAAAGTCTACGTTTGTCCAGTGGCAGGCTGTGTTCATCACGAGCCGTCACGTGCTCTTGGAGATCTCACTGGAATCAAGAAACACTTTTGTCGGAAACACGGC…

## Sheet: Hb25
Back to index
>Aetara_KE151945.1_FGenesh58.1
ATGGAGTTTAACGACGACGAAGAAGACGAAGCTCAAGAAGAAGAAGAAGAAATGAATCTTCCCCAAAACGACACCGTTTTCACCTCTCCTCACTTAGAAACAACAACAACAACAACAACCTCCACCACCAGTGGTGGTTTAATGGTCCTTCACACCGGAACCCCCACCGGAAACACCACCGGAACAAGGTTCCGTTACCGTGAATGTCTCAAAAACCAAGCTGTTAACATCGGAGGTCACGCTCTTGACGGTTGCGGTGAATTTATGCCAGCTGGATCTGAAGGTACAATCGAATCTTTAAAATGTGCTGCTTGTAACTGTCACCGGAATTTTCACCGGAAAGAAACAAATCATCCAATTCCACCTCCTGGTTTTTACCGGATTCCAACTCCGGTAACT…
>Aralyr_AL8G42980.t1
ATGGAGTTTGAAGACAACAACAACGACGAAGAGCAAGAAGAGGATATGAATCTTCACGAGGAAGAAGAAGACGACGACGCCGTTTACGAATCTCCTCCTCTCTCTCGCGTTGTCCCCAAAGCCTCGACAGAAAGTCATGAAACCACCGGAACAACCTCCACAGGCGGTGGCGGAGGATTCATGGTTGTTCACGGCGGTGGAGGAAGCAGGTTTAGGTTCCGTGAGTGTCTCAAGAACCAAGCGGTGAACATAGGAGGACACGCGGTGGATGGTTGTGGTGAGTTTATGCCAGCTGGAATCGAAGGTACTATCGACGCGCTAAAATGCGCCGCTTGTGGCTGTCACCGTAACTTCCACCGCAAGGAATTACCTTACTTCCACCACGCGCCGCCACAACAT…
>Araalp_lcl_CM002876.1_KFK28242.1_20327
ATGGAGTTTCAAGACAACAACAACGAAGAACAAGAAGAAGAAATGAATCTTCACGATGAAGAAGAAGAAGATGAAGACGACGACGTCGTTTACGACTCTCCTCTTCCTTCTCGTACACTCCACAAACCCGAAAACCATCAAGAAACCACCGGAACAACTTCCACCGGTGGCTCTGGTGGATTCATGGTGGTTCACGGTGGTTCCGGTGGTGGTACAAGCAGGTTTAGGTTCCGTGAGTGTTTGAAGAACCAAGCAGTGAACATAGGAGGACACGCAGTTGATGGTTGTGGTGAGTTTATGCCAGCTGGTATCGAAGGAACAATCGATGCCCTAAAATGTGCTGCTTGTGGTTGTCATCGTAACTTCCACCGCAAGGAATTACCTTACTTTCACGCGCCA…
>ArathaCOL_AT5G65410.1
ATGGAGTTTGAAGACAACAACAACAACAACGACGAAGAGCAAGAAGAGGATATGAATCTTCATGAGGAAGAAGAAGACGACGACGCCGTTTACGACTCTCCTCCTCTCTCTCGTGTTCTCCCCAAAGCCTCGACAGAAAGTCATGAAACCACCGGAACTACTTCCACAGGCGGTGGCGGAGGATTCATGGTTGTTCACGGCGGTGGAGGGAGCAGGTTTAGGTTCCGTGAGTGTCTCAAGAACCAAGCGGTGAACATAGGAGGACACGCGGTCGATGGTTGTGGTGAGTTTATGCCAGCTGGAATCGAAGGTACCATCGACGCTCTAAAATGCGCCGCTTGTGGCTGTCACCGTAACTTCCACCGCAAGGAATTACCTTACTTCCATCACGCGCCGCCA…
>Bislae_OVAU01018459.1_FGenesh1.1
ATGGAGTTTGAAGACAACAACAACGAGGATGAGCGAGAAGAGGAAATGAATCTCCACGAGGAAGATGAAGATGACGCCGTTTACGATTCTCCTACTCTTCCTCCACCGTCCCATGTTCTCAAGGCTTCCACAGATAGCCCCGAAACTGCCGGGACAGCTTCAACAGGCGGGGGAGGATTCATGGTGGTTCACGGCAATTCCGGAGGAGAAGGAAGTAGGTTTAGGTTCCGTGAGTGTCTCAAGAACCAAGCGGTGACTATAGGAGGACACGCGGTGGATGGTTGTGGAGAGTTTTTGCCAGCTGGAATCGAAGGTACTATCGACGCGCTAAAATGCGCCGCTTGTGGTTGTCACCGTAACTTTCACCGTAAAGAAATACCATACTTCCACCAGCCTCCA…
>Braole_Parent=BolC2t12474H;Name=BolC2t12474H
ATGGACTTTGAAGAAGAAATTAATCTTCACGAGGAAGAAGAAGAAGAAGACGCCCTTTACGACTCTCCTCCTCTTCCTCCACCGTCTCGCGTCCTCAAGGCCTCCACTGAAAGTCCTGACACCGCCGGAACAACCTCAACCGGCGAAGGAGGATATATGGTGGCTCACGGCGGTTCTTCATTCGGAGGGGGAGGCAGGTTTAGGTTCCGTGAGTGTCTCAAGAACCAAGCGGTGAACATAGGAGGACACGCGGTGGATGGCTGTGGTGAGTATATGCCGGCTGGAATCGAAGGTACCATCGAAGCCCTAAAATGCGCCGCTTGTGGCTGTCACCGTAACTTCCACCGCAAGGAATCACTTTACTTCCACCACCACGCGCCGCCGCCTCCTCCGCCGCCG…
>Braole_Parent=BolC3t18323H;Name=BolC3t18323H
ATGGACTTTGAAGACAACAACAACAACGAAGAAGAAGATGAAATGAATCTTCACGAGGAAGAAGAAGAAGACGAAGACGCCGTTTACGACTCTCCTCCTCTTCCTCCACCGTCTCGCGTCCTCAAAACATCCACTGAAAGTCCTGACACGGCCGGAACAACCTCAACAGGCGGTGGAGGGTTCATGGTGGTACACGGTGGTTCCTCCGGTGGAGGAGGAGGAAGCAGGTTTAGGTTCCGTGAGTGTCTCAAGAACCAAGCGGTGAACATAGGAGGACACGCGGTGGATGGCTGTGGTGAGTTTATGCCAGCTGGAATCGAAGGCACCATCGACGCCCTAAAATGCGCCGCGTGTGGCTGTCACCGTAACTTCCACCGCAAGGAATTACCTTACTTCCAC…
>Braole_Parent=BolC9t53950H;Name=BolC9t53950H
ATGAACTTTGAAGACAACAGCAACGACGAGGAAGAAGAAGAAATGAATCTTCACGAGGAAGAAGAAGACAACGCCGTTTACGACTCTCCTCCTCTTCCTCCATCGTCTCGCGTCCTCAAGGCCTCTACTGAAAGTCCTAACACCGCCGGAACAAACTCAACGGGCGGTGGAGGTTTGATGGTGGTTCACGGCGGTTCTAGGTTCAGGTTCCGTGAGTGTCTCAAGAATCAAGCGGTGAACATAGGACGACATGCGGTGGATGGTTGTCGTGAGTTTATGCCAGCTGGAACCGAAGGTACCATCGACGCCCTAAAATGCGCCGCTTGTGGCTGTCACCGTAACTTCCACCGCAAGGAATTACCTTACTTCCACCACCTCGCGCCGCCGACGCCGCCGGGA…
>Brajun_BjuA008701
ATGGACTTTGAAGAAGAGATTAATCTTCACGAAGAAGAAGAAGACTCCCTTTACGACTCTCCTCCTCTTCCTCCACCGTCTCGCGTCCTCAAGGCTTCCACCGAAAGTCCTGACACCGCCGGAACAACCTCCACCGGCGAAGGAGGATTTATGGTGGTTCACGGCGGTTCCTCCCTCGGAGGGGGAAGCAGGTTTAGGTTCCGTGAGTGTCTCAAGAACCAAGCGGTGAACATAGGAGGACACGCGGTGGATGGTTGTGGTGAGTTTATGCCAGCTGGAATCGAAGGTACCATCGAAGCCCTAAAATGCGCCGCTTGTGGCTGCCACCGTAACTTCCACCGCAAGGAATCATCACCTTACTTCCACAACCACGCGCCGCCGCAACAGCAGCCTCCGAGA…
>Brajun_BjuA045679
GACGCCCTTTACGACTCTCCTCCTCTTCCTCCACCCTCCCGCGTCCTCAAGGCCTCCACTGAAAGTCCTGACACCGCCGGAACAACCTCAACCGGCGAAGGAGGATTTATGGTGGTTCACGGCGGTTCTTCCCTCGGAGGGGGAGGCAGGTTTAGATTCCGTGAGTGTCTCAAGAACCAAGCGGTGAACATAGGAGGACACGCGGTGGATGGCTGTGGCGAGTTTATGCCGGCTGGAATCGAAGGTACCATCGAAGCCCTAAAATGCGCCGCTTGTGGCTGTCACCGTAACTTCCACCGCAAGGAATCACTTTACTTCCACCACCACCACGCGCCGCCGCAACAGCAGCATCATCCTCCTCCTCCGGGATTCTACCGTCTTCCAGCTCCTGTGAGTTAC…
>Brajun_BjuA023100
ATGGACTTTGAAGACAACAACAACAACGAAGAAGAAGATGAAATGAATCTTCACGAGGAAGAAGAAGAAGAAGACGACGCCGTTTACGACTCTCCTCCTCTTCCTCCACCGTCTCGCGTCCTCAAAACATCCACTGAAAGTCCTGACACGGCCGGAACAACCTCAACAGGCGGTGGAGGGTTCATGGTGGTACACGGTGGTTCCTCCGGTGGAGGAGGAGGAAGCAGGTTTAGGTTCCGCGAGTGTCTCAAGAACCAAGCGGTGAACATAGGAGGACACGCGGTGGATGGCTGTGGTGAGTTTATGCCAGCTGGCATCGAAGGCACCATCGACGCCCTAAAATGCGCCGCGTGTGGCTGTCACCGTAACTTCCACCGCAAGGAATTACCTTACTTCCAC…
>Brajun_BjuA032685
ATGAACTTTGAAGACAACAGCAACGACGAGGAAGAAGAAGAAATGAATCTTCACGAGGAAGAAGAAGACAACGCCGTTTACGACTCTCCTCCTCTTCCTCCATCGTCTCGCGTCCTCAAGGCCTCTACTGAAAGTCCTGACACCGCCGGAACAAACTTAACGGGGGGTGGAGGTTTCATGGTGGTTCACGGCGGTTCTAGGTTCAGGTTCCGTGAGTGTCTCAAGAATCAAGCGGTGAACATAGGAGGACACGCGGTGGATGGTTGTCGTGAGTTTATGCCAGCTGGAACCGAAGGTACCATCGACGCCCTAAAATGCGCCGCTTGTGGCTGTCACCGTAACTTCCACCGCAAGGAATTACCTTACTTCCACCACCACGCGCCGCCGCCGCCGCGGGGA…
>Brajun_BjuB007666
ATGGACTTTGAAGACAACACCAACGACGAAGAAGAAGATGACGACGCCGTTAGCGACTCTCCTCCCCTTCCTCTACCCTCGCACATCCTCAGGTCCTCCGCTGAAAGTCCTGGAACAACCTCAACGGGCGGTGGAGGATTCATGGTGGTTCACGGCGGTTCTAGGTTCAGGTTTCGAGAGTGTCTCAAGAATCAAGCAGTGAACATAGGAGGACACGCGGTGGATGGTTGCGGTGAGTTTATGCCAGCTGGAAACGAAGGTACCATCGACGCCCTAAAATGCGCCGCTTGTGGCTGTCACCGTAACTTCCACCGCAAGGAATTACCTTACTTCCACCACCTCTCTCCGCCGCCGCCGCCGCCGGGAGTCTACAGTGTTCCAGCTCCGGTGAGTTACCGA…
>Brajun_BjuB020743
ATGGACTTTGATGACAACAACAACAACAACGAAGAAGAAGAAGAAATGAATCTTCACGAGGAAGAAGAAGAAGAAGAAGAAGACGACGCCGTTTACGACTCTCCACCCTCTCGCGTCCTCAAGACCTCAACCCAAAATCCTGACACCGCTGGAACAACCTCAGCAGGCGGTGGAGGGTTCATGGTGGTCCACGGTGGTTCCTCCGGGGGAGGAAGCAGATTTAGGTTCCGTGAGTGTCTCAAGAACCAAGCGGTGAACATAGGAGGACACGCGGTGGATGGTTGCGGTGAGTTTATGCCAGCTGGAATCGAAGGCACCATCGACGCCCTAAAATGCGCCGCGTGCGGCTGTCACCGTAACTTCCACCGCAAGGAACTACCATACTTCCACCACCACGCG…
>Branig_CM004491.1_FGenesh5710.1
ATGGACTTTGAAGACAACACCAACAACGAAGAAGAAGATGACGACGCCGTTAGCGACTCTCCTCCCCTTCCTCTACCCTCGCACATCCTCAGGTCCTCCACTGAACGTCCTGGAACAACCTCAACTGGCGGTGGAGGATTCATGGTGGTTCACGGAGGTTCTAGGTTCAGGTTTCGTGAGTGTCTCAAGAATCAAGCAGTGAACATAGGAGGACACGCGGTGGATGGTTGCGGTGAGTTTATGCCAGCTGGAAACGAAGGTACCATCGACGCCCTAAAATGCGCCGCTTGTGGCTGTCACCGTAACTTCCACCGCAAGGAATTACCCTTCCACCACCTCTCTCCGCCGCCGCCGCCGGGAGTCTACAGTGTTCCAGCTCCGGTGAGTCACCGAGCACCA…
>Branig_CM004494.1_FGenesh2266.1
ATGGACTTTGATGACAACAACAACAACAACGAAGAAGAAGAAGAAATGAATCTTCACGAGGAAGAAGAAGAAGAAGAAGAAGACGACGCCGTTTACGACTCTCCACCCTCTCGCGTCCTCAAGACCTCAACCCAAAATCCTGACACCGCTGGAACAACCTCAGCAGGCGGTGGAGGGTTCATGGTGGTCCACGGTGGTTCCTCCGGGGGAGGAAGCAGATTTAGGTTCCGTGAGTGTCTCAAGAACCAGGCGGTGAACATAGGAGGACACGCGGTGGATGGTTGCGGTGAGTTTATGCCAGCTGGAATCGAAGGCACCATCGACGCCCTAAAATGCGCCGCGTGCGGCTGTCACCGTAACTTCCACCGCAAGGAACTACCATACTTCCACCACCACGCG…
>Branig_CM004494.1_FGenesh3008.1
ATGGACTTTGAAGAAGAAATTAATCTTCACGAAGAAGAAGAAGACTCCCTTTACGACTCTCCTCCTCTTCCTCCACCGTCTCGCGTCCTCAAGGCTTCCACCGAAAGTCCTGACACCGCCGGAACAACCTCCACCGGCGAAGGAGGATTTATGGTGGTTCACGGCGGTTCCTCCCTCGGAGGGGGAAGCAGGTTTAGGTTCCGTGAGTGTCTCAAGAACCAAGCGGTGAACATAGGAGGACACGCGGTGGATGGTTGTGGTGAGTTTATGCCAGCTGGAATCGAAGGTACCATCGAAGCCCTAAAATGCGCCGCTTGTGGCTGTCACCGTAACTTCCACCGCAAGGAATCATCACCTTACTTCCACAACCACGCGCCGCCGCAACAGCAGCCTCCGAGA…
>Brarap_Parent=BraA02t09316Z;Name=BraA02t09316Z
ATGGACTTTGAAGAAGAAATTAATCTTCACGAGGAAGAAGAAGAAGACGCCCTTTACGACTCTCCTCCTCCTCTTCCTCCACCCTCCCGCGTCCTCAAGGCCTCCACTGAAAGTCCTGACACCGCCGGAACAACCTCAACCGGCGAAGGAGGATTTATGGTGGTTCACGGCGGTTCTTCCCTCGGAGGGGGAGGCAGGTTTAGATTCCGTGAGTGTCTCAAGAACCAAGCGGTGAACATAGGAGGACACGCGGTGGATGGCTGTGGCGAGTTTATGCCGGCTGGAATCGAAGGTACCATCGAAGCCCTAAAATGCGCCGCTTGTGGCTGTCACCGTAACTTCCACCGCAAGGAATCACTTTACTTCCACCACCACCACGCGCCGCCGCAACAGCAGCAT…
>Brarap_Parent=BraA06t26150Z;Name=BraA06t26150Z
ATGGACTTTGAAGACAACAACAACAACGAAGAAGAAGATGAAATGAATCTTCACGAGGAAGAAGAAGAAGAAGACGACGCCGTTTACGACTCTCCTCCTCTTCCTCCACCGTCACGCGTCCTCAAAACATCCACTGAAAGTCCTGACACGGCCGGAACAACCTCAACAGGCGGTGGAGGGTTCATGGTGGTACACGGTGGTTCCTCCGGTGGAGGAGGAGGAAGCAGGTTTAGGTTCCGCGAGTGTCTCAAGAACCAAGCGGTGAACATAGGAGGACACGCGGTGGATGGCTGTGGTGAGTTTATGCCAGCTGGCATCGAAGGCACCATCGACGCCCTAAAATGCGCCGCGTGTGGCTGTCACCGTAACTTCCACCGCAAGGAATTACCTTACTTCCAC…
>Brarap_Parent=BraA09t36554Z;Name=BraA09t36554Z
ATGAACTTTGAAGACAACAGCAACGACGAGGAAGAAGAAGAAATGAATCTTCACGAGGAAGAAGAAGACAACGCCGTTTACGACTCTCCTCCTCTTCCTCCATCGTCTCGCGTCCTCAAGGCCTCTACTGAAAGTCCTGACACCGCCGGAACAAACTTAACGGGGGGTGGAGGTTTCATGGTGGTTCACGGCGGTTCTAGGTTCAGGTTCCGTGAGTGTCTCAAGAATCAAGCGGTGAACATAGGAGGACACGCGGTGGATGGTTGTCGTGAGTTTATGCCAGCTGGAACCGAAGGTACCATCGACGCCCTAAAATGCGCCGCTTGTGGCTGTCACCGTAACTTCCACCGCAAGGAATTACCTTACTTCCACCACCTCGCGCCGCCGCCGCCGCTGGGA…
>Branap_BnaA09g52500D
ATGAATCTTCACGAGGAAGAAGAAGACAACGCCGTTTACGACTCTCCTCCTCTTCCTCCATCGTCTCGCGTCCTCAAGGCCTCTACTGAAAGTCCTGACACCGCCGGAACAAACTTAACGGGGGGTGGAGGTTTCATGGTGGTTCACGGCGGTTCTAGGTTCAGGTTCCGTGAGTGTCTCAAGAATCAAGCGGTGAACATAGGAGGACACGCGGTGGATGGTTGTCGTGAGTTTATGCCAGCTGGAACCGAAGGTACCATCGACGCCCTAAAATGCGCCGCTTGTGGCTGTCACCGTAACTTCCACCGCAAGGAATTACCTTACTTCCACCACCACGCGCCGCCGCCGCCGCGGGGATTCTACCGCCTTCCAGCTCCGGTGAGTTACAGACCATCACCG…
>Branap_BnaC02g43770D
ATGGACTTTGAAGAAGAAATTAATCTTCACGAGGAAGAAGAAGAAGAAGACGCCCTTTACGACTCTCCTCCTCTTCCTCCACCGTCTCGCGTCCTCAAGGCCTCCACTGAAAGTCCTGACACCGCCGGAACAACCTCAACCGGCGAAGGAGGATATATGGTGGCTCACGGCGGTTCTTCATTCGGAGGGGGAGGCAGGTTTAGGTTCCGTGAGTGTCTCAAGAACCAAGCGGTGAACATAGGAGGACACGCGGTGGATGGCTGTGGTGAGTATATGCCGGCTGGAATCGAAGGTACCATCGAAGCCCTAAAATGCGCCGCTTGTGGCTGTCACCGTAACTTCCACCGCAAGGAATCACTTTACTTCCACCACCTCGCGCCGCCGCCTCCTCCGCCGCCG…
>Branap_BnaAnng04880D
ATGGACTTTGAAGAAGAAATTAATCTTCACGAGGAAGAAGAAGAAGACGCCCTTTACGACTCTCCTCCTCTTCCTCCACCCTCCCGCGTCCTCAAGGCCTCCACTGAAAGTCCTGACACCGCCGGAACAACCTCAACCGGCGAAGGAGGATTTATGGTGGTTCACGGCGGTTCTTCCCTCGGAGGGGGAGGCAGGTTTAGATTCCGTGAGTGTCTCAAGAACCAAGCGGTGAACATAGGAGGACACGCGGTGGATGGCTGTGGCGAGTTTATGCCGGCTGGAATCGAAGGTACCATCGAAGCCCTAAAATGCGCCGCTTGTGGCTGTCACCGTAACTTCCACCGCAAGGAATCACTTTACTTCCACCACCACCACGCGCCGCCGCAACAGCAGCATCAT…
>Branap_BnaC03g49000D
ATGGACTTTGAAGACAACAACAACAACGAAGAAGAAGAAGAAATGAATCATCACGAGGAAGAAGAAGAAGAAGAAGACGACGCCGTTTACGACTCTCCTCCTCTTCCTCCACCGTCTGGCGTCCTCAAAACATCCACCGAAAGTCCTGACACGGCCGGAACAACCTCAACAGGCGGTGGAGGGTTCATGGTGGTACACGGTGGTTCCTCCGGTGGAGGAGGAGGAAGCAGGTTTAGGTTCCGTGAGTGTCTCAAGAACCAAGCGGTGAACATAGGAGGACACGCGGTGGATGGCTGTGGTGAGTTTATGCCAGCTGGAATCGAAGGCACCATCGACGCCCTAAAATGCGCCGCGTGTGGCTGTCACCGTAACTTCCACCGCAAGGAATTACCTTACTTC…
>Branap_BnaC09g06950D
ATGAACTTTGAAGACAACAGCAACGACGAGGAAGAAGAAGAAATGAATCTTCACGAGGAAGAAGAAGACAACGCCGTTTACGACTCTCCTCCTCTTCCTCCATCGCCCCGCGTCCTCAAGGCCTCTACTGAAAGTCCTAACACCGCCGGAACAAACTCAACGGGCGGTGGAGGTTTGATGGTGGTTCACGGCGGTTCTAGGTTCAGGTTCCGTGAGTGTCTCAAGAATCAAGCGGTGAACATAGGAGGACATGCGGTGGATGGTTGTCGTGAGTTTATGCCAGCTGGAACCGAAGGTACCATCGACGCCCTAAAATGCGCCGCTTGTGGCTGTCACCGTAACTTCCACCGCAAGGAATTACCTTACTTCCACCACCTCGCGCCGCCGACGCCGCCGGGA…
>Boestr_Bostr.0568s0247.1
ATGGAGTTTGAAGACAACAACAACGACGAGGAGCAAGAAGAGGATATGAATCTTCACGAGGAAGAAGAAGAAGAAGATGCCGTTTACGACTCTCCTCCTCTCTCTCGTGGTGTCGTCAAAGCCTCGACAGAAAGTCATGAAACTACCGGAACAACATCCACAGGCGGCGGAGGATTCATGGTGGTTCACGGCGGAGGAGGAAGCAGGTTTAGGTTCCGTGAGTGTCTCAAGAACCAAGCGGTGAACATTGGAGGACACGCGGTGGATGGTTGTGGTGAGTTTATGCCAGCTGGAATCGAAGGTACCATCGACGCGCTAAAATGCGCCGCTTGTGGCTGTCACCGTAACTTCCACCGCAAGGAATTACCTTACTTCCACAACGCGCCGCCGCAACATCAG…
>Capbur_MPGU01000148.1_FGenesh198.1
ATGGAGTTTGAAGACAACAACAACAACAACAACGAGGAGGAGCAAGAAGATGATATGAATCTTCACGAGGAAGAAGAAGAGGATGATGCCGTTTACGACTCTCCTCCTCTCTCTCGTGGTGTCGTCAAAGCCTCGACGGAGAGTCATGAAACCACTGGAACAACCTCCACAGGCGGCGGTGGAGGATTCATGGTTGTCCACGGCGGAGGAGGGAGCAGGTTTAGGTTCCGTGAGTGTCTCAAGAACCAAGCGGTGAACATTGGGGGACACGCGGTGGATGGCTGTGGTGAGTTTATGCCAGCTGGAATCGAAGGTACCATCGACGCCCTGAAATGCGCCGCTTGTGGCTGTCACCGTAACTTCCACCGCAAGGAATTACCTTACTTCCACCACGCGCCG…
>Capbur_MPGU01000205.1_FGenesh9.1
ATGGAGTTTGAAGACGACAACAACAACAACAACAACAACGAGGAGGAGCAAGAAGATGATATGAATCTTCACGAGGAAGAAGAAGAGGATGATGCTGTTTACGACTCTCCTCCTCTCTCTCGTGGTGTCGTCAAAGCCTCGACAGAGAGTCACGAAACCACTGGAACAACCTCCACAGGCGGCGGCGGCGGTGGAGGATTCATGGTTGTCCACGGCGGAGGAGGGAGCAGGTTTAGGTTCCGTGAGTGTCTCAAGAACCAAGCGGTGAACATTGGGGGACACGCGGTGGATGGCTGTGGTGAGTTTATGCCAGCTGGAATCGAAGGTACCATCGACGCCCTGAAATGCGCCGCTTGTGGCTGTCACCGTAACTTCCACCGCAAGGAATTACCTTACTTC…
>Carhir_CARHR279390.1
ATGGAGTTTGAAGACAACAACAACAACGAAGACGAGATGAATCTTCACGAGGAAGAAGAAGAAGAAGAAGAAGAAGAAGACGAAGACGCCGTTTACGACTCTCCTCCTCTTTCTTCTCGTGTTATCGTCAAAGCCTCAACAGAAAGTCACGAAACCACCGGAACAACTTCCACCGGCGGTGGTGGAGGATTCATGGTTGTTCACGGCGGAGGAGGAAGTGGAGGAAGCAGGTTCAGGTTCCGTGAGTGTCTAAAGAACCAAGCGGTGAACATAGGAGGACACGCGGTGGATGGTTGTGGTGAATTTATGCCAGCTGGAATCGAAGGAACCATAGACGCGCTAAAATGCGCCGCTTGTGGTTGTCACCGTAACTTCCACCGCAAGGAATTACCTTACTTT…
>Capgra_Cagra.0917s0046.1
ATGGAGTTTGAAGACAACAACAACAACAACAACGAGGAGGAGCAAGAAGATGATATGAATCTTCACGAGGAAGAAGAAGAGGATGATGCCGTTTACGACTCTCCTCCTCTCTCTCGTGGTGTCGTCAAAGCCTCGACGGAGAGTCATGAAACCACTGGAACAACCTCCACAGGCGGCGGTGGAGGATTCATGGTTGTCCACGGCGGAGGAGGGAGTAGGTTTAGGTTCCGTGAGTGTCTCAAGAACCAAGCGGTGAACATTGGGGGACACGCGGTGGATGGCTGTGGTGAGTTTATGCCAGCTGGAATCGAAGGTACCATCGACGCCCTGAAATGCGCCGCTTGTGGCTGTCACCGTAACTTCCACCGCAAGGAATTACCTTACTTCCACCACGCGCCG…
>Capcru_Carub.0008s2626.1
ATGGAGTTTGAAGACAACAACAACAACAACAACGAGGAGGAGGAGCAAGAAGATGATATGAATCTTCACGAGGAAGAAGAAGAGGATGATGCCGTTTACGACTCTCCTCCTCTCTCTCGTGGTGTCGTCAAAGCCTCGACGGAGAGTCATGAAACCACTGGAACAACCTCCACAGGCGGCGGCGGCGGTGGAGGATTCATGGTTGTCCACGGCGGAGGAGGGAGCAGGTTTAGGTTCCGTGAGTGTCTCAAGAACCAAGCGGTGAACATTGGGGGACACGCGGTGGATGGCTGTGGTGAGTTTATGCCAGCTGGAATCGAAGGTACCATCGACGCCCTGAAATGCGCCGCTTGTGGCTGTCACCGTAACTTCCACCGCAAGGAATTACCTTACTTCCAC…
>Camsat_Csa02g074380.1
ATGGAGTTTGAAGATAACACCAACAACAACAACGAGGAGGAGCAAGAAGAGGATATGAATCTTCACGAGGAAGAAGAAGAGGACGACGCCGTTTACGACTCTCCTCCTCTTTCTCGTGGTGTCGTCAAAGCCTCGACAGAAAGTCATGAAACCACCGGAACTACCTCCACAGGCGGCGGCGGAGGAGGATTCATGGTTGTTCACGGCGGAGGAGGAGGAGGAAGCAGGTTTAGGTTCCGTGAGTGTCTCAAGAACCAAGCGGTGACCATTGGAGGACACGCGGTGGATGGTTGTGGCGAGTTTATGCCAGCTGGAATCGAAGGTACCATCGACGCGCTGAAATGCGCCGCTTGTGGCTGTCACCGTAACTTCCACCGCAAGGAATTACCTTACTTCCAC…
>Camsat_Csa11g102640.1
ATGGAGTTTGAAGATAACACCAACAACAACAACGAGGAGGAGCAAGAAGAGGATATGAATCTTCACGAGGAAGAAGAAGAGGACGACGCCGTTTACGACTCTCCTCCTCTCTCTCGTGGTGTCGTCAAAGCCTCGACAGAAAGTCATGAAACCACCGGAACAACCTCCACAGGCGGCGGAGGAGGATTCATGGTTGTTCACGGAGGAGGAGGAGGAAGCAGGTTTAGGTTCCGTGAGTGCCTCAAGAACCAAGCGGTGAACATTGGAGGACACGCGGTGGATGGTTGTGGCGAGTTTATGCCAGCTGGAATCGAAGGTACCATCGACGCGCTGAAATGCGCCGCTTGTGGCTGTCACCGTAACTTCCACCGCAAGGAATTACCTTACTTACACCACGCG…
>Camsat_Csa18g039210.1
ATGGAGTTTGAAGATAACACCAACAACAACAACGAGGAGGAGCAAGAAGAGGATATGAATCTTCACGAGGAAGAAGAAGAGGACGACGCCGTTTACGACTCTCCTCCTCTCTCTCGTGGTGTCGTCAAAGCCTCGACAGAAAGTCATGAAACCACCGGAACAACCTCCACAGGCGGCGGCGGAGGATTCATGGTTGTTCACGGCGGAGGAAGCAGGTTTAGGTTCCGTGAGTGTCTCAAGAACCAAGCGGTGAACATTGGAGGACACGCGGTGGATGGTTGTGGCGAGTTTATGCCAGCTGGAATCGAAGGTACCATCGACGCGCTGAAATGCGCCGCTTGTGGCTGTCACCGTAACTTCCATCGTAAGGAATTACCTTACTTCCACCACGCACCGCCG…
>Dipstr_Distr.0003s0222.1
ATGGAGTTCGAAGATGAAATGAATCTCCATGAAGAAGAAGAAGAAGACGACGAAGATGAAGAAGAAGAAGAAGACGACGCCGTTTACAACTCTCCTCCTCCTCCTCCACGTGTCATCAAACCCTCCACTGAAAATCCCGACACAACCGGTACAACTTCAACCGGAGCTGGAACCGGAACCGGAACCGGAGGAGGATTCATGGTGGTTCACGGTGGTTCCGGTTCAAGATTCCGTTTCCGTGAATGTCTAAAGAACCAAGCAGTCAACATCGGAGGTCACGCCGTCGACGGTTGCGGAGAATTCATGCCGGCGGGAATCGAAGGAACAATCGACGCACTAAAATGCGCCGCTTGTGGCTGTCACCGTAATTTCCACCGCAAAGAATTACCATATTACCCT…
>Eutesa_Thhalv10005568m
ATGGAGTTTGAAGACAACAACAACAACAACGAAGAAGAAGACGAAATGAATCTTCACGAGGAAGAAGAAGACGACGCCGTTTACGACTCTCCTTCTCTTCCTCCTCCTTCTCGTGTCCTCAAGGCCTCCACAGAGAGCCCTGAAACCGCCGGAACAACTTCCACCGGCGGTGGAGGATTCATGGTAGTTCACGGAGGTTCCGGAGGAAGCAGGTTTAGGTTCCGTGAGTGTCTCAAGAACCAAGCGGTGAACATAGGAGGACACGCGGTGGATGGTTGCGGCGAGTTTATGCCAGCTGGAATCGAAGGTACCATCGACGCGCTAAAATGCGCCGCTTGTGGCTGTCACCGTAACTTCCACCGCAAGGAACTACCTTACTTCCACCACCACGCGCCGCCG…
>Eruves_Eruve.5252s0007.1
ATGGACTTTCAAGAAAACAACAACAACAATCAAGAAGATGAAGAAGACCAAATGAATCTCCACGATGAAGAAGAACAAGAAGAAGACGACGCCGTTTACGACTCTCCAGTACCGTCTCGTGTCCTCAAAACCTCCACTGAAAGTCCCGACACAACCGGAACAACTTCAGCAGGCGTCGGAGGAGGAGGGTTCATGGTGGTTCACGGTGGCTCCTCCTCCTCAAGCAGGTTTAGGTTCCGTGAGTGTCTCAAGAACCAAGCGGTGAACATAGGAGGACACGCGGTGGACGGTTGCGGCGAGTTTATGCCAGCTGGAATCGAAGGAACCATCGATGCCCTAAAATGCGCAGCGTGTGGCTGTCACCGTAACTTCCACCGCAAGGAACTACCTTATTTCCAC…
>Eruves_Eruve.1171s0004.1
ATGGACTTTCAAGAAAACAACAACAACAATCAAGAAGATGAAGAAGACCAAATGAATCTCCACGATGAAGAAGAACAAGAAGAAGACGACGCCGTTTACGACTCTCCAGTACCGTCTCGTGTCCTCAAAACCTCCACTGAAAGTCCCGACACAACCGGAACAACTTCAGCAGGCGTCGGAGGAGGAGGGTTCATGGTGGTTCACGGTGGCTCCTCCTCCTCAAGCAGGTTTAGGTTCCGTGAGTGTCTCAAGAACCAAGCGGTGAACATAGGAGGACACGCGGTTGACGGTTGCGGCGAGTTTATGCCAGCTGGAATCGAAGGAACCATCGATGCCCTAAAATGCGCAGCGTGTGGCTGTCACCGTAACTTCCACCGCAAGGAACTACCTTATTTCCAC…
>Eruves_Eruve.1171s0005.1
ATGGACTTTCAAGAAAACAACAACAACAATCAAGAAGATGAAGAAGACCAAATGAATCTCCACGATGAAGAAGAACAAGAAGAAGACGACGCCGTTTACGACTCTCCAGTACCGTCTCGTGTCCTCAAAACCTCCACTGAAAGTCCCGACACAACCGGAACAACTTCAGCAGGCGTCGGAGGAGGAGGGTTCATGGTGGTTCACGGTGGCTCCTCCTCCTCAAGCAGGTTTAGGTTCCGTGAGTGTCTCAAGAACCAAGCGGTGAACATAGGAGGACACGCGGTTGACGGTTGCGGCGAGTTTATGCCAGCTGGAATCGAAGGAACCATCGATGCCCTAAAATGCGCAGCGTGTGGCTGTCACCGTAACTTCCACCGCAAGGAACTACCTTATTTCCAC…
>Eruves_Eruve.0769s0019.1
ATGGACTTTGAAGACAACAACAACGAAGAAGAAGAACTTAACCTTCACGAGGAAGAAGACGCCCTTTACGACTCTCCTCCTCTTCCTCCACCTTCTCGCGCCCTCAAGGCCTCCACTGAAAGTCCTGACACCGCCGGAACAACCTCAACCGGGGAAGGAGGCTTTATGGTCGGAGGGGGAAGCAGGTTTAGGTTCCGTGAGTGTCTCAAGAACCAAGCGGTGAACATAGGAGGACACGCGGTGGATGGTTGTGGTGAGTTTTTGCCAGCTGGAATCGAAGCCCTAAACTGCGCCGCTTGTGGCTGTCACCGTAACTTCCACCGCAAAGAATCACTTTACTTCCACCACCACCACGCGCCGCCCCCGCCAAGATTCTACCGTCTTCCAGCTCCGGTGCGA…
>Isatin_Isati.5336s0001.1
ATGGAGTTCGAAGACAACAGCAACAACAATAACGAAGAAGAAGACGAAATGAACCTTCACGAGGAAGAAGAAGAAGAAGACGACGCCGTTTACGACTCTCCTCCTCTTCCTCCACCGTCTCGCGTCCTCAAGACCTCCGCTGAAAGTCCAGACACCGCCGGAACAACCTCAACTGGCGGTGGAGGATTCATGGTGGTTCACGGCGGTTCATCCGGGGGAGGAGGAAGCAGGTTTAGGTTCCGTGAGTGTCTCAAGAACCAAGCGGTGAACATAGGAGGACACGCGGTGGATGGTTGTGGTGAGTTTATGCCAGCTGGAATCGAAGGTACCATCGACGCGCTAAAATGCGCCGCTTGTGGCTGTCACCGTAACTTCCACCGCAAGGAATTACCTTACTTC…
>Isatin_Isati.6575s0004.1
ATGGAGTTCGAAGACAACAGCAACAACAATAACGAAGAAGAAGACGAAATGAACCTTCACGAGGAAGAAGAAGAAGACGACGCCGTTTACGACTCTCCTCCTCTTCCTCCACCGTCTCGCGTCCTCAAGACCTCCGCTGAAAGTCCAGACACCGCCGGAACAACCTCAACTGGCGGTGGAGGATTCATGGTGGTTCACGGCGGTTCATCCGGGGGAGGAGGAAGCAGGTTTAGGTTCCGTGAGTGTCTCAAGAACCAAGCGGTGAACATAGGAGGACACGCGGTGGATGGTTGTGGTGAGTTTATGCCAGCTGGAATCGAAGGTACCATCGACGCGCTAAAATGCGCCGCTTGTGGCTGTCACCGTAACTTCCACCGCAAGGAATTACCTTACTTCCAC…
>Isatin_Isati.17696s0001.1
ATGGAGTTCGAAGACAACAACAACAATAATAACGAAGAAGAAGACGAAATGAACCTTCACGAGGAAGAAGACGAAGACGACGCCGTTTACGACTCTCCTCCTCTTCCTCCACCGTCTCGCGTCCTCAAGGCCTCCGCCGAAAGTCCTGACACCGCCGGAACAACCTCAACTGGCGGTGGAGGATTCATGGTGGTTCACGGCGGTTCATCCGGGGGAGGAGGAAGCAGGTTTAGGTTCCGTGAGTGTCTCAAGAACCAAGCGGTGAACATAGGAGGACACGCGGTGGATGGTTGTGGTGAGTTTATGCCAGCTGGAATCGAAGGTACCATCGACGCGCTAAAATGCGCCGCTTGTGGCTGTCACCGTAACTTCCACCGCAAGGAATTACCTTACTTCCAC…
>Lunann_Luann.0076s0124.1
ATGGAGTTTGAAGACAACGACGAAGAGCAAGAAGAAGAAATGAATCTTCACGAGGAAGAAGAAGAAGAAGAAGAAGACGCTGTTTACGACTCTCCTCCTATTCCTTCACCGTCCCGTGTCCTCAAGGCTTCCACAGGAAGTCCTGACACAGTCGGAACAACCTCCAACGACGGTGGGGGATTCATGGTGGTTCACGGCGGTTCTGGAGGAGGAAGCAGGTTCAGATTCCGTGAGTGTCTCAAGAATCAAGCGGTGAACATAGGAGGACACGCGGTGGATGGTTGTGGTGAGTTTATGCCAGCTGGAATAGAAGGTACTATCGATGCGCTAAAATGCGCCGCTTGCGGCTGTCACCGTAACTTCCACCGCAAGGAATTACCTTACTTTCACCACGCGCCG…
>Lunann_Luann.0010s0609.1
ATGGAGTTTGAAGACAACAACAACAACGAAGAAGAGCAAGAAGAGGAAATGAATCTTCACGAGGAAGAAGAAGAAGAAGACGATGCCGTTTACGACTCTCCTCCTCTTCCTCTACCGTCTCGTGTCCTCAAGGCCTCCACAGAAAGTCCTGACACTGCCGGAACAACCTCAACCGGCGGCGGAGGATTTATGGTGGTTCACGGCAGTTCTGGAGGAGGAGGAAGCAGGTTTAGGTTTCGTGAGTGTCTCAAGAACCAAGCGGTGAACATAGGAGGACACGCGGTGGATGGTTGTGGTGAGTTTATGCCAGCTGGAATCGAAGGGACCATCGACGCTCTAAAGTGCGCCGCTTGTGGCTGTCACCGTAACTTCCACCGTAAAGAATTACCATACTTCCAC…
>Leaala_ASXC01023914.1_FGenesh1.1
GCGCCGCCTCAACAACCACCTCCTCCACCACAAGGTTTTTACCGTCTCCCAGCTCCTGTAAGTTACCGACCACCACCGTCACAAGTTCCTCCACTTCAGCTCGCTCTTCCTCCTCCACAAAGAGAGAGATCAGAAGATCCAATGGAGACTTCGTCAGCGGAAGCAGGAGGGATAAGGAAGAGGTTTAGGACTAAGTTCACGGCGGAGCAAAAAGAGAAGATGTTAGGTTTAGCTGAGAGGATTGGGTGGAGAATCCAAAGACAAGACGAGGAACTGATTCAGAGATTTTGTCAAGAAACTGGAGTACCAAGACAAGTTCTTAAGATAGATCTGGGGAAGGAGACATGTGGGCTCTTTGGAAGCAAGGAGGAGAAGAGTTAA
>Leaala_KE156681.1_FGenesh16.1
CCTGTAAGTTACCGACCACCACCGTCACAAGTTCCTCCACTTCAGCTCGCTCTTCCTCCTCCACAAAGAGAGAGATCAGAAGATCCAATGGAGACTTCGTCAGCGGAAGCAGGAGGGATAAGGAAGAGGTTTAGGACTAAGTTCACGGCGGAGCAAAAAGAGAAGATGTTAGGTTTAGCTGAGAGGATTGGGTGGAGAATCCAAAGACAAGACGAGGAACTGATTCAGAGATTTTGTCAAGAAACTGGAGTACCAAGACAAGTTCTTAAGGTTTGGTTACATAACAACAAACACACTCTTGGTAAGTCGCCTTCTCCAATATTTCCTCATCCTCCACAACCTTCGTTTCATCATGAACAAGACCCCAACCATGAATCTTGA
>Leaala_KE158883.1_FGenesh11.1
ATGGAATTTGAAGACAACAACAACAACGAAGAGCAAGAGGATGAGATGCACCTTCACGAGGACGACGAAGAAGAAGAAGAAGAAGAAGACGACGCGGTTTACGACTCTCCTCCTCCATCTCGAGGACACGCGTTGGATGGTTGTGGTGAGTTTATGCCAGCTGGAATTGAAGGTACCATCGATGCTCTAAAATGCGCCGCTTGTGGCTGTCACCGTAACTTCCACCGTAAGGAATTACCTTATTTTCACCACCCGCCGCCTCAACATCCTCCTCATCCACCGCAAGGATTTTACCGTCTTCCAGCTCCTATAAGTTACCGACCACCACCTTCACAAGCTCCTCCACTTCAGGTAGCTCTTCCTCCTCCACAAAGAGAGAGATCAGAAGATCCAATGGAG…
>Lepsat_Lesat.0028s0015.1
ATGGAGTTTGAAGACAACACCAACAACAACGAAGAGCAAGAAGAAGACATCAATCTCCACGAAGAAGAAGAAGATGATGATGTTTATGACTCTCCTCCTCTTCCTTCTCGTATCATTAAACCCTCAACAGAAAGTGTAGAAACCACCGGAACTACTTCAACCGGTGGTGGTGGATTCATGGTGGTTCACGGCGGAGGAAGTAGGTTTAGGTTTCGTGAGTGTTTAAAGAACCAAGCGGTGAATATAGGAGGACATGCGGTTGATGGTTGTGGTGAGTTTTTACCAGCTGGAGTTGAAGGAACCATTGATGCTTTAAAATGTGCGGCTTGTGGTTGTCACCGTAACTTCCACCGCAAGGAATTACCTTACTTTAGCCACGCGCCACCGTCTCAACACTTA…
>Lepsat_Lesat.0055s0133.1
ATGGAGTTTGAAGACAACAACAGCAACACCAACAACGAAGAAGAAGACATCAATCTCCACGAAGAAGAAGAAGATGAAGATGTTTATGATTCTCCTCCTCTTCCTTCTCGTATTATCAAACCCTCAACAGAAAGTGTAGAAACCACCGGAACAACTTCTACAGGTGGTGGATTCATGGTGGTTCACGGCGGAGGAAGTAGGTTTAGGTTTCGTGAATGCTTAAAGAACCAAGCAGTGAATATAGGAGGACATGCGGTTGATGGATGTGGTGAGTTTTTACCAGCTGGAATTGAAGGAACCATTGATGCTTTAAAATGTGCTGCTTGTGGTTGTCACCGTAACTTCCACCGCAAGGAATTACCTTACTTTAACCACGCGCCACCGTCTCAACACTTACCT…
>Noccae_OVBC01000133.1_FGenesh3.1
ATGGAGTTTGAAGAGAACAACAACGACGAAGAGGAAATGAATCTTCACGAGGAAGAAGAAGACGACGCCGTTTACGACTCTCCTCCTCTTCTTCCACCGTCCCGTGTCCTTAAGGCCTCCACAGAAAGTCCTGACACCGCAGGAACAACCTCCACCGGGGGCGGAGGATTCATGGTGGTTCATGGCGGTCCCGGCGGCGGGGGAGGAAGCAGGTTCAGGTTCCGTGAGTGTCTCAAGAACCAAGCGGTGAACATAGGAGGACACGCGGTAGATGGCTGTGGTGAGTTTATGCCAGCTGGAATCGAAGGTACCATCGACGCGCTAAAATGCGCCGCTTGTGGCTGTCACCGTAACTTCCACCGCAAGGAATTGCCGTACTTCAACCATCACGCGCCGCCG…
>Rorisl_Roisl.0024s0434.1
ATGGAGTTTGAAGACAACAACAACAACAACGAAGAGCAAGAGGACGAGATGAACCTTCACGAGGAAGAAGAAGAAGACGATGCCGTTTACGACTCTCCTCCTCCCTCTCGTTTTATGGTCAAAGCCTCGACAGAAACTCATGAAACCACCGGAACAACTTCAACCGGCGGTGGTGGAGGATTCATGGTGGTTCACGGTGGAGGAGGAGGAAGCAGGTTCAGGTTCCGAGAGTGTCTAAAGAACCAAGCTGTGAACATAGGAGGACACGCGGTGGATGGTTGTGGTGAGTTTATGCCAGCTGGAATCGAAGGAACCATCGATGCGCTAAAATGCGCCGCTTGTGGCTGTCACCGTAACTTCCACCGCAAGGAATTGCCTTACTTTCACCACGCGCCGCCG…
>Rapsat_Rsa1.0_00073.1_g00033.1
ATGGACTTTGAAGAAGAAATTAATCTTCACAAGAAAGAAGAAGAAGAAGCCCTTTACGACTCTCCTCCTCTTCCTCCACCGTCTCGCGTCCTCAAGGCCTCCACTGAAAGCCCTGACACCGCCGGAGGATATATGGTGGTTCACGGAGGTTCTTCCCTCGGAGGGGGAAGCAGGTTTAGGTTCCGTGAGTGTCTAAAGAACCAAGCGGTGAACATAGGAGGACACGCGGTGGATGGTTGTGGTGACTTTATGCCAGCTGGAATCGAAGGTACCATCGAAGCCCTAAAATGCGCCGCTTGTGGCTGTCACCGTAACTTTCACCGCAAGGAATCGCTTTACTTCCACCAACACCACGCGTCGCCTCCTCCACCGCCGGGATTTTACAGTCTTCCAGCTCCG…
>Rapsat_Rsa1.0_01545.1_g00005.1
ATGGACTTTGCAGACAACAACAACAACAACGAAGAAGAAGAAGAAATGAATCTCCACGAGGAAGAAGAAGAAGAAGAAGACGACGCCGTTTACGACTCTCCACCTCTTCATCCACCTTCTCGCGTCCTCAAGACAACAACCGTAAGTCCCGACACGGCTGGAACAACCTCAACAGGCGGTGGAGGGTTCATGGTGGTCCACGGTGGTTCTTCAGGAGGAGGAAGCAGGTTTAGGTTCCGTGAGTGTCTCAAGAACCAAGCGGTGAACATAGGAGGACACGCGGTGGATGGTTGTGGTGAGTTTATGCCAGCTGGAATCGAAGGCACCATCGACGCCCTAAAATGCGCCGCCTGTGGCTGTCACCGTAACTTCCACCGCAAGGAATTATCATACTTCCAC…
>Sinalb_Sialb.0854s0023.1
GGTGGTTCCTCCGGAGGAGGAAGCAGGTTTAGGTTCCGTGAGTGTCTCAAGAACCAAGCGGTGAACATAGGAGGACACGCGGTGGATGGCTGTGGTGAGTTTCTGCCAGCTGGAATCGAAGGAACCATCGACGCCTTAAAATGCGCCGCGTGTGGCTGTCACCGTAACTTCCACCGCAAGGAACTACCATACTTCCACCACCACGCGCCACCGCATCAGCCTCCTCCTCCTCCGCCGGGATTCTACCGTCTTCCAGCTCCGGTGAGTTATCGACCACCGCCGTCACAAGCTCCTCCTCTTCAGCTAGCTCTTCCTCCACCACAAAGAGAGAGATCAGAAGATCGTATGGAGACTTCTTCTGCGGAGGCAGGAGGAGGAGGAGGAAGTGGGATTAGGAAG…
>Sinalb_Sialb.0451s0012.1
ATGGACTTTGAAGACAACACTAACAACGAAGAAGAAGACGACACCATTTGCGACTCTCCTCCTCCTCTTCCTCTACCGTCGCACATCCTCATGAGTTCCTCCACTGGAACAACCACCTCAACGGGCGGTGGAGGATTCATGGTGGTTCACGGCGGTTCTAGGTTCAGGTTCCGTGAGTGTCTCAAGAATCAAGCGGTGAACATAGGAGGACACGCGGTGGATGGTTGTGGTGAGTTTATGCCAGCTGGAACCGAAGAAACCATCGATGCCCTAAAATGCGCCGCTTGTGGCTGTCACCGTAACTTCCACCGCAAGGAATTACCTTACTACCACCACCTCTCCTCGCCGCCGCCGCCGCCGGGAGTCTACAGTGCTCCAGCTCCGGTGAGTTACCGACCA…
>Sinalb_Sialb.0510s0038.1
ATGGACTTTGAAGACAACAACAACAACCAAGAAGAAGAAGAAATGAATCTTCATGAGGAAGAAGAAGAAGAAGAAGAAGAAGACGACGCCGTTTACGACTCTCCACCTCTTCCTCCACCGTCTCGCGTCCTCAAGACCTCAACTGAAAGTCCTGACACAGCTGGAACAACCTCAACAGGTGGTGGAGGGTTCATGGTGGTCCACGGTGGTTCCTCCGGAGGAGGAAGCAGGTTTAGGTTCCGTGAGTGTCTCAAGAACCAAGCGGTGAACATAGGAGGACACGCGGTGGATGGCTGTGGTGAGTTTCTGCCAGCTGGAATCGAAGGAACCATCGACGCCTTAAAATGCGCCGCGTGTGGCTGTCACCGTAACTTCCACCGCAAGGAACTACCATACTTC…
>Schpar_CM001188.1_FGenesh1215.1
ATGGAGTTTAACGACAACAACAACAACGAAGAAGAAGACGAAATGAATCTTCAGGAGGAAGAAGAGGACGACGCCGTTTACGACTCTCCTCCTCTTCCTCCACCGTCCCGTGTCTTCAAGGCCTCCACTGAAAGTCCTGATACCGCCGGAACAACTTCAACCGGCGGTGGAGGATTCATGGTGGTTCACGGCGGTTCCTCCGGCGGAGGAGGAAGCAGGTTTAGGTTCCGTGAGTGTCTCAAGAACCAAGCGGTGAACATAGGAGGACACGCGGTGGATGGTTGTGGTGAGTTTATGCCAGCTGGAGTCGAAGGTACCATCGACGCGCTGAAATGCGCCGCTTGTGGCTGTCACCGTAACTTCCACCGCAAGGAACTACCTTACTTCCACCATCACGCG…
>ArathaSHA_ATSHA-5G90280.1
ATGGAGTTTGAAGACAACAACAACAACAACGACGAAGAGCAAGAAGAGGATATGAATCTTCACGAGGAAGAAGAAGACGACGACGCCGTTTACGACTCTCCTCCTCTCTCTCGTGTTCTCCCCAAAGCCTCGACAGAAAGTCATGAAACCACCGGAACTACTTCCACAGGCGGTGGCGGAGGATTCATGGTTGTTCACGGCGGTGGAGGGAGCAGGTTTAGGTTCCGTGAGTGTCTCAAGAACCAAGCGGTGAACATAGGAGGACACGCGGTCGATGGTTGTGGTGAGTTTATGCCAGCTGGAATCGAAGGTACCATCGACGCTCTAAAATGCGCCGCTTGTGGCTGTCACCGTAACTTCCACCGCAAGGAATTACCTTACTTCCATCACGCGCCGCCA…
>Sisiri_KE154866.1_FGenesh107.1
ATGGAGTTCGAAGAAGACAACAACAACAACAACAACAACGAAGAAGAAGACGAAATGAATCTTCACGAGGAAGAAGAAGAAGACGATGCGGTTTACGACTCTCCTCCTCTTGCTCCACCGTCTTCTCGCGTCCTCAAGTCCTCCACTGAAAGTCCTGACACCACAGGAACAACCTCAACTGGAGGTGGAGGATTCATGGTTGTTCACGGCGGTTCTTCCGGAGGAAGCAGGTTTAGGTTCCGTGAGTGTCTCAAGAACCAAGCTGTGAACATAGGAGGGCACGCGGTGGATGGTTGTGGTGAGTTTATGCCAGCTGGTATCGAAGGCACTATCGACGCGCTAAAATGCGCTGCTTGTGGTTGTCATCGTAACTTCCACCGCAAGGAACTACCTTACTTC…
>Thlarv_Thlar.0004s0261.1
ATGGAGTTTGATGACAACAACAATAACAACAACGAAGAAGAAGACGAAATGAATCTTCACGAAGAAGAAGAAGACGACGCCGTTTACGACTCTCCTCCTCTTCCTCAACCGTCCCGTGTCCTCAAGCCCTCCACTGAAAGTCCTGACACCGCCGGAACAACCTCCACAGGCGGAGGAGGATTCATGGTGGTTCACGGCGGAGGAGGAAGCAGGTTTAGGTTTCGTGAGTGTCTCAAGAACCAAGCGGTGAACATCGGAGGACACGCGGTGGATGGCTGTGGTGAGTTTATGCCAGCTGGAATCGAAGGTACCATCGACGCGCTAAAATGCGCCGCTTGTGGCTGTCACCGTAACTTCCACCGCAAAGAGTTACCTTACTTCCAGCATCACGCGCCGCCG…

## Sheet: Rsw3
Back to index
>Aetara_KE152698.1_FGenesh6.1
ATGAGATCTCTTCTCTTGTTGTTATTTCTCATTTGCTTGAGCTCGCAAACTGTTATTTCATGGAAGAAGGAGGAGTTTCGAAGCTGTGACCAAACTCCATTTTGTAAACGTGGTCGATCTCGTAGTCCCGGTGCGTGTTCTCTGATTGTTAGCCATGTATCGATTGCCGATGGAGACCTTGTTGCGAAGCTCGTCCCGAAAACTCCTGCTCAAGGCGATGGGGAACAGATCAAGCCGTTGGTTCTATCTCTCTCGGTTTACCGGGATGGGATTGTGCGGCTTAGGATTGATGAGGATCATTCTTTGTCTCCGCCGAAGAAGAGATTCAGAGTTCCTGATGTGGTAGTATCTGAGTTCGAAGAGAAGAAGATCTGGCTTCAGAAAGTTGCGACGGAGAAG…
>Aralyr_AL8G41070.t1
ATGAGATCTCTTCTCTTTGTACTATCACTCATTTGCTTCTGCTCCCAAACAGCACTTTCATGGAAGAAGGAAGAGTTTCGCAGCTGTGACCAAACTCCATTTTGTAAACGCGCTCGATCTCGTACTCCCGGCGCGTGTTCTCTGATTGTCGGCGATGTTTCCATCACTGATGGAGATCTCGTAGCGAAGCTTCTACCGAAAACGCCTAATCATGGCGATGGGGATCAGATCAAGCCGTTGATTCTATCTCTCTCGGTTTACAAGGATGGGATCGTGCGGCTCAAAATCGACGAGGACCATTCGTTGAACCCGCCGAAGAAGAGGTTTCAAGTTCCTGATGTGGTAGTGTCTGAGTTCGAGGAGAAGAAGATCTGGCTGCAGAAAGTAGCGACGGAGACG…
>Araalp_lcl_CM002876.1_KFK28077.1_20162
ATGAGATATCTTCTCTTTATACTATCACTCCTTTGCTTTTGCTCACAAACAACACTTTCATGGAAGAAGGAAGAGTTTCGAAGCTGTGACCAAACTCCATTTTGTAAACGCGCTCGATCTCGTACTCCCGGAGCTTCTTCTCTGATCGTCGGAGATGTTACAATCACCGATGGAGATCTCGTAGCGAAGCTCTCACCGAAAAGCCCTAATCAAAGCGATGTAGATCAGATCAATCCGTTGATTCTATCTCTCTCGGTTTACAAAGACGGGATCGTACGGCTAAGGATCGATGAAGATCATTCGTTGAATCCACCGAAGAAGAGATTCAGAGTTCCTGATGTGATAGTGTCTGAGTTCGATGAGAAGAAGATCTGGCTTCAGAAAGTTACGACTGAGACG…
>ArathaCOL_AT5G63840.2
ATGATCGTCTTCCTCAGTGTTGTATTTTGGCTTTCCTCATTGCTTCCTCAATCTAAGGATTTCCATGAACAAGGAACTAAAATGAGATCTCTTCTCTTTGTACTATCACTCATTTGCTTTTGCTCTCAAACAGCACTTTCATGGAAGAAGGAAGAGTTTCGCAGCTGTGACCAAACTCCATTTTGTAAACGCGCTCGATCTCGTACTCCCGGCGCGTGTTCTCTAATTGTCGGCGATGTTTCCATCACTGATGGAGATCTCGTAGCGAAGCTTCTACCGAAAGCGCCTAATCAAGGCGATGGGGATCAGATCAAGCCGTTGATTCTTTCTCTCTCAGTTTACAAGGATGGGATCGTGCGGCTTAAAATCGATGAGGACCATTCGTTGAACCCGCCGAAG…
>Bislae_OVAU01013852.1_FGenesh1.1
ATGAGATCTCTTCTCTTTGCAGTATCATTCATTTACTTATGCTCACAGACTTCAATTGCATGGAAGAAGGAGGAGTTTCGCAGCTGTGACCAAACCCCATTTTGTAAACGCGCTCGATCTCGTACTCCAGGCGCGTGTTCTCTGATTGTGGGCGATGTTTTCATCACCGATGGAGATCTCGTTGCGAAGATTTTACCAAAAAACCCTAATCAAGGGGATGGCGTTCAGATCAAGCCATTGGTTCTCTCTATTTCAGTTTACAAGGATGGAATCGTGCGTCTCGGGATCGATGAGGACCATTCGCTTAACCCGCCGAAGAAGAGATTCAGAGTTCCTGATGTGGTAGTGTCTGAGTTCGAGGAGAAGAAGATATGGCTGCAGAAAGTAGCGACGGAGACA…
>Bislae_OVAU01015023.1_FGenesh1.1
ATGAGATCTTTTCTATTAGTACTATCACTCATTTGCTTCTGCTCACAAACTGCAATTTCATGGAAGAAGGAGGAGTTTTGCAGCTGTGACCAGACTCCATTTTGTAAACGTGCTCGATCTCGTACTCCCGGCGCGTGTTCTCTGATTTTCCAGGATGTTTCCATTACCGATGGAGATCTCATGGCGAAGCTCCTACCTAAAACCCCTAATGGGGATCAGATCAAGCCGATGGTTCTCTCTATTTCTGTTTACACGGATGGAATAGTGCGGTTGAGGGTTGATGAAGACCATTCGCTGAACCCGCCGAAGAAGAGATTCAGAGTTCCTGATGTGGTAGTCTCTGAGCTCGAAGGGAAGAAGATCTGGCTACAGAAAGTTGCCACGGAGACTATCTCTGGA…
>Bislae_OVAU01015023.1_FGenesh2.1
ATGCGAGGATCCTACATCCACCGCCGTTTCGTCTTTTCCGAGGGTATTCTTACATCAACGAACATAGCTCCTCGACAAGCTAGTCTCTCTTCCCAATCCTTGATCGACAGAATTATCCTCTTGGGATACGGGTCGGGTTCGAAATCTGCACTTGTCGAGCCGTTAAGTCAAAAGGTAGAGATTGAGATGGGACCATTGCGAATGGGTGGGCTTGTAGCTTCCTCTGCTACAAAGGTCTTGACTATACGCAAACTGGGTGTTCGAGTAGATCAGGATTGGACCGTTAAAATTATGTAA
>Bislae_OVAU01074731.1_FGenesh1.1
GTGGTAGCTTTGAACAGTTCTCAAGAAGCAGATGGAGAACTCTACATCGACGACGGTAAAAGCTTTGAATTCAGACGAGGCTCATACATCCACCGCCGTTTCGTTTTCTCCAATGGCATTCTTACATCAACAAACATAGCTCCTCCACAAGCTAGTCTCTCTTCCCAATGCTTGATCGACAGAATTATCCTCTTGGGGTACGGGTCGGGTCCAAAATCTGCGCTAGTCGAACCCTTGAATCAAAAGGCAGAGATTGAGATGGGACCACTGCGAATGGGTGGGCTTGTAGTTTCCTCGAGTACAAAGGTATTGACTATCCGCAAACCGGGTATTAGAGTGGACCAGGACTGGACCATAAAGATTCTGTGA
>Bislae_OVAU01089033.1_FGenesh1.1
GGAACAACACATGCTTCCGTGTATTTTCCTGGCAAAGAATCATGGTATGACCTGAGAAACGGAAAGACATACGCCGGAGGCAAGACTCACAAGATGGACGCTCCGGAGGAAAGCATTCCTGCGTTTCAGAGGGCGGGAGCTATTATCCCGAGGAAGGATCGGTTTAGACGAAGCTCTTCTCAAATGGACTATGATCCTTATACTTTG
>Bislae_OVAU01104616.1_FGenesh1.1
CAAAGCTTTGAATTCAGACGAGGCTCATACATCCACCGCCGTTTCGTTTTCTCCAATGGTATTCTTACATCAACGAACATAGCTCCTCCACAAGCTAGTCTCTCTTCCCAATGCTTGATCGACAGAATTATCCTTTTGGGACATGGATCGGGTCCGAAATCTGCGCTTGTCGAACCCTTGAATCAAAAGGCAGAGATTGAGATGGGACCATTGCGAATGGGTGGGCTTGTAGCTTCCTCGGGTACAAAGGTATTGACTATCTGCAAACCGGGTGTTCGAGTGGACCAGGACTGGACCGTAAAGATTCTGTGA
>Bislae_OVAU01105792.1_FGenesh1.1
ATGGCGACTTCTGATGGGCTTGTTATGCGTGGAGAAGGAAAGGATAGGCCTTTTGTGTTGTCAAGAGCAATCTTTCCTGGCACTCAAAGATACGGTGCAATTTGGACTGGAGATAACACAGCTGAATGGGAACACCTTAGGGTCTCCGTTCCAATGTTATTGACACTTGGGGNTGATGTTGGTGGGTTCTTCGGAAATCCTGAACCAGAACTATTAGTTAGGTGGTACCAAGTGGGTGCTTACTATCCCTTTTTCAGAGGTCATGCTCATCATGACACCAAAAGACGAGAGCCTTGGTTGTTTGGGTAA
>Braole_Parent=BolC3t18518H;Name=BolC3t18518H
TCAGTATTCTTCTTCCTCAATCTAGAGATTCCATTCCGATTCTATGAACGAGGAACCAAAATGAGATCTCTTCTCTTTATACTATCACTCATTTGCTTCTGCTCCCAGACATCATTTTCATGGAAGAAGGAGGAGTTTCGCAGCTGTGAGCAGACTCCATTCTGCAAACGCGCTCGATCCCGTTCTCCCGGCGCGTGTTCTCTCATCGCAAGCGATGTTTCCATCGCCGATGGAGATCTAGTAGCGAAGCTCCTTCCGAAAATCGCTAACCAAAGCGACGAGGATCAGATCAAGCCGTTGGTACTCTCTCTCTCCGTTTACACAGACGGGATCGTGCGGCTCAGGATCGATGAGGATCATACGCTGAATCCGCCGAAGAAGAGATTCAGAGTTCCAGAC…
>Braole_Parent=BolC9t53865H;Name=BolC9t53865H
ATGAGATCCCTTCTCTTCACACTATCACTCCTCTGCTTCGCCTCGCAAACATCACTCTCATGGAAGAAGGAGGAGTTCCGCAGCTGCGACCAAACTCCCTTCTGCAAACGCGCTCGATCCCGCTCCCCCGGCGCGTGCTCCCTAATCGCAACCGACGTCACCATCGCCGACGGAGATCTCGTCGCGAAGCTAACACCCAAAGATAACGACGATCAGATCAATCCGCTGGTCCTCTCTCTATCGGTTTACAGAGACGGGATCGTGCGGCTGAGAATCGACGAGGATCACTCGTTAAACCCGCCGAAGAAGAGATTCAGAGTTCCCGACGTGGTGGTCCCCGAGCTCGAGGAGAAGAAGATCCGCCTCGAGAAATTCGCCACGGAGAACGATCCTCCGTCT…
>Brajun_BjuA006698
ATGAGATCTCTTCTCTTTGTACTATCTCTGATCTGCTTCGCCTCACAAACAGCACTTTCATGGAAGAAGGAGGAGTTTCGCAGTTGCGATCAAACTCCATTCTGCAAACGCGCTCGATCCCGTGCTCCCGGCGCGTGTTCACTCATCGCAAGCGATGTTTCCATCGCCGATGGAGATCTAGTAGCGAAGCTCCTACCGAAAATCGCTAACCAAAGCGACGAGGATCAGATCAAGCCGTTGGTACTCTCTCTCTCCGTTTACGCCGACGGGATCGTGCGGCTCAGGATCGATGAGGACCACACGCTGAATCCGCCGAAGAAGAGATTCAGAGTTCCAGACGTGGTAGTCTCCGAGTTCGATGAGAAGAAGATCTGGCTTCAGAAAGTAGCCACGGAGACG…
>Brajun_BjuA032631
ATGAGATCCCTTCTCTTCACACTATCACTCCTCTGCTTCGCCTCGCAAACATCTCTCTCATGGAAGAAGGAAGAGTTCCGCAGCTGCGACCAAACTCCCTTCTGCAAACGCGCTCGCTCCCGCGCCCCCGGAACCTGCTCCCTAATCGCAACCGACGTCACCATCTCCGACGGAGATCTCGTCGCGAAGCTAACACCCAAAGATAACGACGATCACATCAATCCGTTGATTCTCTCTCTATCGGTTTACCGAAACGGGATCGTGCGCCTGAGAATCGACGAGGATCACTCGCTAAACCCGCCGAAGAAGAGATTCAGAGTTCCCGACGTGCTGGTCTCCGAGCTCGAGGCGAAGAAGATCCGCCTCGAGAAATTCGCCACGGAGAACGATCCTCCCTCT…
>Brajun_BjuB039592
ATGCATGCTTCTGTGTATTTGCCTGGCAAAGAATCATGGTATGACCTGAGAAACGGAAAGACATACGTTGGAGAGAAGACTCACAAGATGGATGCTCCTGAAGAAAGCATTCCTGCGTTTCAAAGAGCCGGAACTATCATTCCGAGGAAAGATCGGTTCCGGCGAAGTTCATCTCAAATGACAAATGATCCTTATACTTTGGTACGTGATATAGCTTTGAACAGTTCTCAAGAAGCAGATGGTGAACTCTACATAGACGATAGCAAAAGCTTTGAATTCAAACGAGGCTCTTACATACACCGACGCTTCGTCTTCTCCAATGGTGTTCTTACATCAAAGAACTTAGCTCCTCCAGAAGCTAGTCTCTCTTCCGAATGCTTGATCGACAGAATCATCCTC…
>Brajun_BjuB020579
ATGAGATCTCTTCTCTTTGTACTATCGCTCATCTGCTTAGGCTCACAAACAGCACTCTCATGGAAGAAGGAAGAGTTTCGCAGCTGCGATCAAACTCCATTCTGCAAACGCGCCCGATCCCGTTCTCCCGGCGCGTGTTCTCTCATCGTAACCGATGTTTCGATCACCGATGGAGATCTCGTAGCGAAGCTCGTACCGAAAATCGCTAACCAGAGCGATGATGATCAGATCAAGCCGTTGGTACTCTCTCTCACGGTATACACCGATCGGATCGTGCGGCTCAGGATCGATGAGGACCACACGCTGAATCCGCCGAAGAAGAGATTCAGAGTTCCTGATGTGGTGGTCTCCGAGCTCGAGGAGAAGAAGATCTGGCTGCAGAAACTAGCCACGGAGACG…
>Branig_CM004491.1_FGenesh5608.1
ATGAAGCCTTCATGGTTGGTAATGGTCTGTTGGTGCAAGGAGTTTACACTATTTCTACTTTCGCCTACCTTTGTCTCGTTAACAGAATCAAACATCTATATTTCAGAAGTTATTCTCGTCAATATGCAAAAAATTAGGGAACAACGCATGCATGCTTCTGTGTATTTGCCTGGCAAAGAATCATGGTATGACCTGAGAAACGGAAAGACATACGTTGGAGAGAAGACTCACAAGATGGATGCTCCTGAAGAAAGCATTCCTGCGTTTCAAAGAGCCGGAACTATCATTCCGAGGAAAGATCGGTTCCGGCGAAGTTCATCTCAAATGACAAATGATCCTTATACTTTGGTACGTACTACTCGTTCACTGTCTCATTGTTTTATCATCTGCTATCGATCT…
>Branig_CM004494.1_FGenesh2032.1
ATGAGATCTCTTCTCTTTGTACTATCGCTCATCTGCTTAGGCTCACAAACAGCACTCTCATGGAAGAAGGAGGAGTTTCGCAGCTGCGATCAAACTCCATTCTGCAAACGCGCCCGATCCCGTGCTCCCGGCGCGTGTTCTCTCATCGCGAGCGATGTTTCAATCGCCGATGGAGATCTCGTAGCGAAGCTCATACCGAAAATCGCTAACCAGAGCGATGAGGATCAGATCAAGCCGTTGGTGCTCTCTCTCACGGTTTACACCGATCGGATCGTGCGGCTCAGGATCGACGAGGACCACACGCTGAACCCGCCGAAGAAGAGATTCAGAGTTCCTGATGTGGTGGTCTCCGAGCTCGAGGAGAAGAAGATCTGGCTGCAGAAAGTAGCCACGGAGACG…
>Brarap_Parent=BraA06t25994Z;Name=BraA06t25994Z
ATGAGATCTCTTCTCTTTGTACTATCTCTGATCTGCTTCGCCTCACAAACAGCACTTTCATGGAAGAAGGAGGAGTTTCGCAGCTGCGATCAAACTCCATTCTGCAAACGCGCTCGATCCCGTTCTCCCGGCGCGTGTTCTCTCGTCGCAAGCGATGTTTCCATCGCCGATGGAGATCTAGTAGCGAAGCTCCTACCGAAAATCGCTAACCAAAGCGACGAGGATCAGATCAAGCCGTTGGTACTCTCTCTCTCCGTTTACGCCGATGGGATCGTGCGGCTCAGGATCGATGAGGACCACACGCTGAATCCGCCGAAGAAGAGATTCAGAGTTCCTGACGTGGTAGTCTCCGAGTTCGATGAGAAGAAGATCCGGCTTCAGAAAGTAGCCACGGAGACG…
>Brarap_Parent=BraA09t36492Z;Name=BraA09t36492Z
ATGAGATCCCTTCTCTTCACACTATCACTCCTCTGCTTCGCCTCACAAACGTCTCTCTCATGGAAGAAGGAAGAGTTCCGCACCTGCGACCAAACTCCCTTCTGCAAACGCGCTCGATCCCGCGCCCCCGGAACCTGCTCCCTAATTGCAACCGACGTCACCATCTCCGACGGAGATCTCGTCGCGAAGCTAACACCCAAAGATAACGACGATCACATCAATCCGTTGATTCTCTCTCTATCGGTTTACCGAAACGGGATCGTGCGCCTGAGAATCGACGAGGATCACTCGCTAAACCCGCCGAAGAAGAGATTCAGAGTTCCCGACGTGCTGGTCTCCGAGCTCGAGGCGAAGAAGATCCGCCTCGAGAAATTCGCCACGGAGAACGATCCTCCCTCT…
>Branap_BnaA09g52350D
ATGAGATCCCTTCTCTTCACACTATCACTCCTCTGCTTCGCCTCGCAAACATCTCTCTCATGGAAGAAGGAAGAGTTCCGCAGCTGCGACCAAACTCCCTTCTGCAAACGCGCTCGCTCCCGCGCCCCCGGAACCTGCTCCCTAATCGCAACCGACGTCACCATCTCCGACGGAGATCTCGTCGCGAAGCTAACACCCAAAGATAACGACGATCACATCAATCCGTTGATTCTCTCTCTATCGGTTTACCGAAACGGGATCGTGCGCCTGAGAATCGACGAGGATCACTCGCTAAACCCGCCGAAGAAGAGATTCAGAGTTCCCGACGTGCTGGTCTCCGAGCTCGAGGCGAAGAAGATCCGCCTCGAGAAATTCGCCACGGAGAACGATCCTCCCTCT…
>Branap_BnaA09g52360D
ATGGTTTCACATGGGGGAACTGGTAAAAGTTCCGGTTTTTTCTGGTTGAATGCTGCTGAGATGCAGATCGATGTTTTAGCTGAGGGATGGGATGCAGAGAGTGGTGGTGGAGATAGTAGAATTAATACATTGTGGATGAGTGAGGCAGGGATTGTGGATACCTTCTTTTTCGTCGGCCCTGAGCCTAAGGATGTTGTGAGGCAGTATGCTAGTGTGACTGGTACTTCAGCTATGCCTCAGTTGTTTGCTACTGGTTATCATCAGTGTAGGTGGAATTATAAAGATGAGGAGGATGTGGCGCAGGTGGATTCGAAGTTTGACGAGTATGATATTCCTTATGATGTTCTGTGGCTTGATATTGAGCATACGGATGGGAAGAGGTACTTTACGTGGGACAGT…
>Branap_BnaA06g22950D
ATGAGATCTCTTCTCTTTGTACTATCTCTGATCTGCTTCGCCTCACAAACAGCACTTTCATGGAAGAAGGAGGAGTTTCGCAGTTGCGATCAAACTCCATTCTGCAAACGCGCTCGATCCCGTGCTCCCGGCGCGTGTTCACTCATCGCAAGCGATGTTTCCATCGCCGATGGAGATCTAGTAGCGAAGCTCCTACCGAAAATCGCTAACCAAAGCGACGAGGATCAGATCAAGCCGTTGGTACTCTCTCTCTCCGTTTACGCCGACGGGATCGTGCGGCTCAGGATCGATGAGGACCACACGCTGAATCCGCCGAAGAAGAGATTCAGAGTTCCAGACGTGGTAGTCTCCGAGTTCGATGAGAAGAAGATCTGGCTTCAGAAAGTAGCCACGGAGACG…
>Branap_BnaA06g22960D
ATGGTTTCACATGGGAAATCTGGTAAAACTTCGGGATTTTTCTGGTTGAATGCTGCGGAGATGCAGATTGATGTTTTGGCTAACGGGTGGGATGCAGAGAGTGGTATTGCATTGCCTTCTAGTGAGAGTAGGATTGATACATTGTGGATGAGTGAGGCGGGGATTGTGGATACATTCTTTTTCGTTGGGCCTGGGCCTAAGGATGTTGTGAAACAGTATGCAAGTGTGACTGGTACTTCAGCGATGCCTCAGTTGTTTGCTACTGGTTATCACCAATGTAGGTGGAACTATAAAGATGAGGAGGATGTGGCGCAGGTGGACTCGAAATTCGACGAGCATGACATTCCTTATGATGTTCTCTGGCTTGACATTGAGCATACAGATGGGAAGAGATACTTT…
>Branap_BnaC09g06100D
ATGAGATCTCTTCTCTTCACACTATCACTCCTCTGCTTCGCCTCGCAAACATCACTCTCATGGAAGAAGGAGGAGTTCCGCAGCTGCGACCAAACTCCCTTCTGCAAACGCGCTCGATCCCGCTCCCCCGGCGCGTGCTCCCTAATCGCAACCGACGTCACCATCTCCGACGGAGATCTCGTCGCGAAGCTAACACCCAAAGATAACGACGATCAGATCAATCCGCTGGTCCTCTCTCTATCGGTTTACGGAGACGGGATCGTGCGGCTGAGAATCGACGAGGATCACTCGTTAAACCCGCCGAAGAAGAGATTCAGAGTTCCCGACGTGGTGGTCCCCGAGCTCGAGGAGAAGAAGATCCGCCTCGAGAAATTCGCCACGGAGAACGATCCTCCGTCT…
>Branap_BnaC09g06110D
ATGGTTTCACATGGGGGAACTGGTAAAAGTTCGGGTTTTTTCTGGCTGAATGCTGCTGAGATGCAGATTGATGTTTTAGCTGAGGGGTGGGATGCAGAGAGTGGTGGTGGAGAGAGTAGGATTGATACATTGTGGATGAGCGAGGCGGGGATTGTGGATACCTTCTTTTTCGCTGGCCCTGAGCCTAAGGATGTTGTGAGGCAGTATGCTAGTGTGACTGGTACTTCAGCTATGCCTCAGTTGTTTGCTACTGGCTATCACCAGTGTAGGTGGAACTATAAAGATGAGGAGGATGTGGCGCAGGTGGACTCGAAGTTCGACGAGCATGACATTCCTTATGATGTTCTGTGGCTTGACATTGAGCATACGGATGGGAAGAGGTACTTTACGTGGGACAGT…
>Branap_BnaC03g50520D
ATGAGATCTCTTCTCTTTATACTATCACTCATTTGCTTCTACTCCCAGACATCATTTTCATGGAAGAAGGAGGAGTTTCGCAGCTGCGACCAGACTCCATTCTGCAAACGCGCTCGATCCCGTTCTCCCGGCGCGTGTTCTCTCATCGCAAGCGATGTTTCCATCGCCGACGGAGATCTATTAGCGAAGCTCCTTCCGAAAATCGCTAACCAAAGCGACGAGGATCAGATCAAGCCGTTGGTACTCTCTCTCTCCGTTTACACCGACGGGATCGTGCGGCTCAGGATCGATGAGGATCATACGCTGAATCCGCCGAAGAAGAGATTCAGAGTTCCAGACGTTGTAGTCTCCGAGTTCGATGAGAAGAAGATCTGGCTTCAGAAAGTAGCCACGGAGACG…
>Branap_BnaC03g50510D
ATGGTTTCACATGGAAAATCTGGTAAAACTTCGGGATTTTTCTGGTTGAATGCTGCGGAGATGCAGATTGATGTTTTGGCTAATGGATGGGATGCAGAGAGTGGTATTGCATTGCCTTCTAGTGAGAGTAGGATTGATACGTTGTGGATGAGCGAGGCGGGGATTGTGGATACATTCTTTTTCGTAGGGCCTGGGCCTAAGGATGTTGTGAAGCAGTATGCTAGTGTGACTGGTACTTCAGCGATGCCTCAGTTGTTTGCTACTGGTTATCACCAGTGTAGGTGGAACTACAAGGATGAGGAGGATGTGGCTCAGGTGGACTCGAAATTCGACGAGCATGATATTCCTTATGATGTTCTCTGGCTTGACATCGAGCATACGGATGGGAAGAGATACTTT…
>Boestr_Bostr.0568s0423.1
ATGAGATCTCTTCTCTTTGTACTATCACTCATTTGCTTCTGCTCACAAACAGCACTTTCATGGAAGAAGGAGGAGTTTCGCAGCTGCGACCAAACTCCATTCTGTAAACGGGCTCGATCCCGTACTCCCGGCGCGTGTTCTTTAATTGTCGGCGATGTTTCCATCACTGATGGAGATCTCGTAGCGAAGCTACTACCTAAAATCCCTAATCAAGGCGACGGGGATCAGATCAAGCCGTTGATTCTATCTCTCTCGGTTTACACGGATGGGATCGTACGTCTCAGAGTCGATGAGGACCACTCGCTGAACCCACCGAAGAGGAGATTCAGAGTTCCTGATGTGGTAGTGTCTGAGTTCGAGGAGAAGAAGATCTGGCTGCAAAAAGTAGCGACGGAGACG…
>Capbur_MPGU01000362.1_FGenesh160.1
ATGAGATCTCTTCTCTTTATACTATCACTCATTTGCTTCAGCTCACAAACAGCTCTCTCATGGAAGAAGGAGGAGTTTCGCAGCTGCGACCAAACTCCATTCTGTAAACGCGCTCGATCCCGTGCTCCCGGCGCGTGTTCTCTAATCGTCGGCGATGTTTCCATCACCGATGGAGATCTCGTAGCGAAGCTACTACCGAAAACCCCTAATCAAGGCGATGGTGATCAGATCAATCCGTTGGTTCTATCTCTCTCGGTTTATAGGGATGGGATCGTGCGATTCAGAGTCGATGAGGACCATTCGCTGAACCCGCCGAAGAAGAGATTCAGAGTTCCTGATGTGGTAGTGTCTGAGTTCGAAGAGAAGAAGATCTGGCTACGGAAAGTAGCGACTGAGGCG…
>Capbur_MPGU01000485.1_FGenesh59.1
ATGAGATCTCTTCTCTTTATACTATCACTCATTTGCTTCAGCTCACAAACAGCTCTCTCATGGAAGAAGGAGGAGTTTCGCAGCTGCGACCAAACTCCATTCTGTAAACGCGCTCGATCCCGTGCTCCCGGCGCGTGTTCTCTAATCGTCGGCGATGTTTCCATCACCGATGGAGATCTCGTAGCGAAGCTACTACCGAAAACCCCTAATCAAGGCGATGGTGATCAGATCAATCCGTTGGTTCTATCTCTCTCGATTTATAGGGATGGGATCGTGCGATTCAGAGTCGATGAGGACCATTCGCTGAACCCGCCGAAGAAGAGATTCAGAGTTCCTGATGTGGTAGTGTCTGAGTTCGAAGAGAAGAAGATCTGGCTACAGAAAGTAGCAACTGAGACG…
>Carhir_CARHR277740.1
ATGAGATCTCTTCTCCTTGTACTATCACTCATTTGCTTCTGCTCACAATCAGCACTTTCATGGAAGAAGGAGGAGTTTCGCAGCTGCGACCAAACTCCATTCTGTAAACGCGCTCGATCCCGTACTCCCGGCGCGTGTTCTCTAATTGTCGGCGATGTTTCCATCACCGATGGAGATCTCGTAGCTAAGCTTCTACCGAAAACACCTAATCAAAGCGATGGAGATCAGATCAAGCCATTGATTCTATCTCTCTCGGTTTACACAGATGGGATCGTACGGCTGAGGATCGATGAGGATCATTCTTTGAACCCGCCGAAGAAGAGATTCAGAGTTCCTGATGTGGTAGTGTCTGAGTTAGAAGAGAAGAAGATCTGGCTACAGAAAGTATCGACGGAGACG…
>Capgra_Cagra.0248s0063.1
ATGAGATCTCTTCTCTTTATACTATCACTCATTTGCTTCAGCTCACAAACAGCTCTCTCATGGAAGAAGGAGGAGTTTCGCAGCTGCGACCAAACTCCATTCTGTAAACGCGCTCGATCCCGTGCTCCCGGCGCGTGTTCTCTAATCGTCGGCGATGTTTCCATCACCGATGGAGATCTCGTAGCGAAGCTACTACCGAAAACCCCTAATCAAGGCGATGGTGATCAGATCAATCCGTTGGTTCTATCTCTCTCGATTTATAGGGATGGGATCGTGCGATTCAGAGTCGATGAGGACCATTCGCTGAACCCGCCGAAGAAGAGATTCAGAGTTCCTGATGTGGTAGTGTCTGAGTTCGAAGAGAAGAAGATCTGGCTACAGAAAGTAGCAACTGAGACG…
>Capcru_Carub.0008s2461.1
ATGAGATCTCTTCTCTTTATACTATCACTCATTTGCTTCAGCTCACAAACAGCTCTCTCATGGAAGAAGGAGGAGTTTCGCAGCTGCGACCAAACTCCATTCTGTAAACGCGCTCGATCCCGTGCTCCCGGCGCGTGTTCTCTAATCGTCGGCGATGTTTCCATCACCGATGGAGATCTCGTAGCGAAGCTACTACCGAAAACCCCTAATCAAGGCGATGGTGATCAGATCAATCCGTTGGTTCTATCTCTCTCGATTTATAGGGATGGGATCGTGCGATTCAGAGTCGATGAGGACCATTCGCTGAACCCGCCGAAGAAGAGATTCAGAGTTCCTGATGTGGTAGTGTCTGAGTTCGAAGAGAAGAAGATCTGGCTACAGAAAGTAGCAACTGAGACG…
>Camsat_Csa02g072530.2
ATGAGATCTCTTCTCTTTGTACTATCACTCATTTGCTTCTGCTCGCAAACAACACTTTCATGGAAGAAGGAGGAGTTTCGCAGCTGTGACCAAACTCCGTTCTGTAAACGCGCTCGATCCCGTACTCCCGGCGCGTGTTCTTTAATCGTCGGCGATGTTTCCATCACCGATGGAGATCTCGTAGCGAAGCTTCTACTGAATCAAGAAGATGGTGATCAGATCAAGCCGTTGGTTCTATCTCTCACGGTTTATAAGGATGGGATCGTGCGATTGAGAGTCGATGAGGACCATACGCTGAACCCGCCGAAGAAGAGTTTCGTTTATGGAATCCCTGAACACGCCACTAGCTTCGCCTTGAAGCCTACCAAGGGTCCTGGAGTTGAGGAATCTGAACCATAT…
>Camsat_Csa18g037430.1
ATGAGATCTCTTCTCTTTGTAATATCACTCATTTGCTTCTGCTCACAAACAGCTCTTTCATGGAAGAAGGAGGAGTTTCGCAGCTGTGACCAAACTCCGTTCTGTAAACGCGCTCGATCCCGTACTCCCGGCGCGTGTTCCCTAATCGTCGGCGATGTTTCCATCACCGATGGAGATCTCGTAGCGAAGCTTCTACCGAAAACCCCTAATCAAGACGATGGTGATCAGATCAAGCCGTTGGTTCTATCTCTCTCGGTTTATAGGGATGGGATCGTGCGATTCAGAGTCGATGAGGACCATTCGCTGAACCCGCCGAAGAAGAGGTTCAGAGTTCCTGATGTGGTAGTGTCTGAGTTCGAGGAGAAGAAGATCTGGCTTCAGAAAGTAGCCACGGAGACG…
>Camsat_Csa11g100920.1
ATGAGATCTCTTCTCTTTGTAATATCACTCATTTGCTTCTGCTCGCAAACAGCACTTTCATGGAAGAAGGAGGAGTTTCGCAGCTGCGACCAAACCCCGTTCTGTAAACGCGCTCGATCCCGTACTCCCGGCGCGTGTTCCCTAACCGTCGGCGATGTTTCCATCACCGATGGAGATCTCGTAGCGAAGCTAGTACCGAAAAAAACCCCTAATCAAGAAGATGGTGATCAGATCAAGCCGTTGGTTCTGTCTCTCTCGGTTTATAGGGATGGGATCGTGCGATTCAGAGTCGATGAGGACCATTCGCTGAACCCGCCGAAGAAGAGGTTCAGAGTTCCTGATGTGGTAGTGTCTGAGTTCGAGGAGAAGAAGATCTGGCTTCAGAAAGTAGCCACGGAG…
>Camsat_Csa02g072530.1
ATGAGATCTCTTCTCTTTGTACTATCACTCATTTGCTTCTGCTCGCAAACAACACTTTCATGGAAGAAGGAGGAGTTTCGCAGCTGTGACCAAACTCCGTTCTGTAAACGCGCTCGATCCCGTACTCCCGGCGCGTGTTCTTTAATCGTCGGCGATGTTTCCATCACCGATGGAGATCTCGTAGCGAAGCTTCTACTGAATCAAGAAGATGGTGATCAGATCAAGCCGTTGGTTCTATCTCTCACGGTTTATAAGGATGGGATCGTGCGATTGAGAGTCGATGAGGACCATACGCTGAACCCGCCGAAGAAGAGGTTCAGAGTTCCTGATGTGGTAGTGTCTGAGTTCGAGGAGAAGAAGATCTGGCTTCAGAAACTAGCCACGGAGACGATCTCCGGA…
>Dipstr_Distr.0265s0004.1
ATGAGATCTCTTCTCTTTATAATATCACTCATTTGCTTGGGATCGCAAACGGCACTGTCATGGAAGAAGGAGGAGTTTCGAAGCTGTGACCAAACTCCATTCTGTAAACGCGCTCGATCCCGTACTCCCGGAGCGTGTTCTCTAACTGTCAGCGATGTTACCATCACCGATGGAGATCTCGTTGCGAAAATTCTACCGAAAATCCCTAATCAAGGCGATGGGGATCAGATCAAGCCGTTGGTTCTATCTCTCTCGGTTTACACGGACGGGATCGTGCGGCTCAGGATCGATGAAGACCATTCACTGGAACCTCCGAAGAAGAGATTCAGAGTTCCTGATGTGGTAGTGTCTGAGTTCGAGGCGAAGAAGATCTGGCTTCAGAAAGTAGCGACGGAGACG…
>Eutesa_Thhalv10003620m
ATGAAATATCTTCTCTTTCTACTATCACTTCTTTGCTTCGGATCCCAAACAGCGATTTCATGGAAGAAGGAGGAGTTTCGAAGCTGCGATCAAACTCCATTCTGTAAACGCGCTCGATCTCGTACTCCTGGTGCCTGTTCTCTGATTGTAGGCGATGTTTCCATCTCCGATGGAGATCTTGTAGCCAAGCTCCTACCAAAAGCCCCTAATCAAGGCGATGGTGATCAGATCAAGCCGTTGGTACTCTCTCTCTCGGTTTATACGGATGGGATCGTGCGGCTTAGGATTGATGAGGACCATTCACTGGAACCACCGAAGAAGAGATTCAGAGTGCCTGATGTGGTAGTGTCCGAATTCGAGGATAAGAAGATCTGGCTGCATAAAGTAGCGACGGAGACG…
>Eruves_Eruve.0009s0078.1
ATGAACGAGGGAGGAACCAAAATGAGATCTCTTCTCTTCATACTATCACTCATCTACTTCACCTCACAACCATCCCTCTCATGGAAGAAGGAAGAGTTTCGCACCTGTGACCAAACACCATTCTGCAAACGCGCTCGATCCCGCGCCCCCGGCGCGTGTTCCCTCATCGCGACCGACGTCTCCATCACCGACGGAGATCTAACAGCGAAACTCATCCCTAAAATCCCTAACAACCAAAGCAGCGATCAGATCAAGCCGTTGATACTATCCCTCACCGTTTACACAGATCGGATCGTACGGCTCAGGATCGACGAGGATCATTCACTGAACCCGCCGAAGAAGAGATTCAGAGTCCCCGACGTTGTAGTCTCCGAGCTCGACGATAACAAGATCCGGCTT…
>Isatin_Isati.6474s0006.1
ATGAGATCTCTTCTCTTTGTACTATCACTCATTTGCTTCTGCTCACAAACAGCACTTTCATGGAAGAAAGAGGAGTTTCGCAGCTGTGACCAAACTCCATTCTGTAAACGCGCTCGATCCCGTACTACCGGCGCGTGTTCTCTGATCGTCGGCGATGTTTCCATCAACGATGGAGATCTCGTAGCGAAGCTACTACCAAAAATCCCTAATCAAGGCGATGGGGATCAGATCAAGCCTTTGGTACTCTCTCTCTCGGTTTATACGGGCGGGATCGTGCGGCTCAGGATCGATGAGGATCATTCGCTGAACCCGCCGAAGAAGAGATTCAGAGTGCCTGATGTGGTAGTGTCAGAGTTCGAGGAGAAGAAGATCTGGCTGCAGAAAGTAGCGACGGAGACC…
>Isatin_Isati.7825s0003.1
ATGTTATTGACACTTGGTCTTACTGGAATCACATTCTCAGGAGCTGATATTGGTGGGTTCTTTGGAAACCCTGAACCAGAACTACTAGTTAGATGGTACCAAGTCGGTGCTTACTATCCGTTTTTCAGGGGTCATGCTCATCATGACACCAAAAGACGAGAGCCTTGGTTGTTTGGTGAACGGAATACAGAACTCATGAGAGATGCCATACACACTCGTTACACGCTGCTCCCATACTTCTACACGTTATTTAGAGAAGCAAATGTTACGGGTGTGCCTGTCTTACGTCCGTTATGGATGGAATTCCCACAAGATGAAGCTACTTATAGCAACGATGAAGCCTTCATGGTCGGTAATGGTCTATTGGTGCAAGGAGTTTACACTAAGGGAACAACACAT…
>Isatin_Isati.1104s0022.1
ATGCCAAGGGATGCACTGCATGTTGGTGGTGTTGAACACAGGGAAGTTCATAACGCTTATGGATATTACTTTCACATGGCAACTTCCGATGGACTTGTCATGCGTGGAGAAGGAAAGGATAGGCCTTTTGTATTGTCAAGAGCGATCTTTCCTGGTACTCAAAGATACGGAGCAATTTGGACTGGAGATAACACAGCCGAATGGGAACACCTTAGAGTCTCTATTCCAATGTTATTGACACTTGGTCTTACTGGAATCACATTCTCAGGAGCTGATATTGGTGGGTTCTTTGGAAACCCTGAACCAGAACTACTAGTTAGATGGTACCAAGTCGGTGCTTACTATCCATTTTTCAGGGGTCATGCTCATCATGACACCAAAAGACGAGAGCCTTGGTTG…
>Lunann_Luann.0040s0158.1
ATGAGATCTCTTCTCTTTGTATTATTACTCATCTGCTTCTGCTCTCAAACAGTGATTTCATGGAAGAAAGAGGAGTTTCGCAGCTGCGACCAAACTCCATTCTGTAAACGAGCTCGATCCCGTACTCCCGGTGCGTGTTCTCTGATTGTAAGCGATGTTTCCATCACCGATGGAGATGTCGTAGCGAAGCTCCAACCGAAAATTACTAATCAAGGCGATGAGGATCAGATCAAGCCGTTGGTACTCTCTCTCTCGGTTTATACGGATGGGATCGTGCGTCTCAGAATCGATGAGGACCACTCGCTGAACCCGCCGAAGAAGAGATTCAGAGTGCCTGATGTGGTAGTGCCCGAGTTCGAGGAGAAGAAGATCTGGCTGCAGAAAGTAGCGACGGAGACT…
>Lunann_Luann.0010s0749.1
ATGAGATCTCTTCTCTTTGTACTATTACTCATTTGGTATTGCTCCCAAACAGCACTTTCATGGAAGAAGGAGGAGTTTCGCAGCTGTGACCAAACTCCATTCTGTAAACGCGCTCGATCCCGTAATCCGGGCGCGTGTTCTCTGATTGTCGGCGATGTTTCCATCACCGATGGAGATCTCGTGGCGAAGATCCTACCGAAAATCCCTAATCCAGGCGATGGGGATCAGATCAGACCTTTGATTCTCTCTCTCTCGGTTTATACGGATGGGATCGTGCGGCTCAGGATCGATGAAGACCATTCGCTGAACCCGCCGAAGAAGAGATTCAGAGTTCCTGATGTGGTAGTATCTGAGTTCGAGGAGAAGAAGATCTGGTTGCAGAAAGTAGTGACGGAGACG…
>Leaala_KE157310.1_FGenesh23.1
ATGTGGCAGTGGTTGATTAGTTCTGGTGCTAACAATCCTTTTATATTTGGATGGCTTGTAACTGGATCTGTTGGGATTCTGACTGTTATCTACATACTACTTAGATGGCAGAAAAAAACTTCTTTAAATTGGGTTAAAGCTGCTGCTAGAGAGAAGAAGAAGGTATGGAAAAGACTGAGAGTTCCACTTTCTCATCATCAATGGACGGATGATTATGGTTATGGCCCTCAACCATCCACTTGCTGTGTTTGTCTTTACTCCCTTCTTCCAGGTCAAAATGTTTCTAATAAGGCTGCTCTCACTATTCCTGTCCACCGTTGTGCTGTATGTGGTGTAGCAGCTCATTTTTATTGCTCAGGCTCTGCTGCGAAAGACTGTAAATGTGTTGGCCAGGCTGGA…
>Leaala_KE159292.1_FGenesh43.1
ATGGTTTCACATGGGAAATCTGGTAAAACTTCTGGATTTTTCTGGTTGAATGCTGCGGAAATGCAGATTGATGTGTTGGCTGATGGATGGGATTCAGAGAGTGGTATTTCTCTGCCTTCCAGTCAGGGTAGGATCGACACATTATGGATGAGCGAAGCAGGGATTGTGGATACTTTCTTTTTCGTTGGACCTGGACCAAAGGATGTAGTAAAGCAGTATGCAAGTGTGACAGGTACTTCAGCTATGCCTCAGTTATTTGCCACTGGTTATCACCAATGTAGGTGGAATTACAAAGATGAGGAGGATGTGGCACAGGTGGATTCGAAATTTGATGAGCATGATATTCCTTATGATGTTCTCTGGCTTGACATCGAACATACAGATGGGAAAAGATACTTT…
>Lepsat_Lesat.0028s0147.1
ATGAGATCCCTTCTCCTTGTACTGTCACTCATTTGGTTCTGCTCTCAAACAGCACTTTCATGGAAGAAGGAAGAGTTTCGCAGCTGCGACCAAACTCCATTTTGTAAACGCGCTCGATCCCGTACTCCGGGGACGTGTTCTCTAATTGTCGGCGATGTTTCCATCACCGATGGCGATCTCGTGGCGAAGCTACTACCGAAAATCCCTAATCAAGGTGATGGGGATCAGATCAAGCCGTTGGTTCTTTCTCTCTCGGTTTACACGGATGGGATCGTGCGGCTCAGAGTAGATGAGGACCATTCGCTGAACCCACCGAAGAAGAGATTCAGAGTTCCTGATGTGGTAGTGTCTGAATTCGAGGAGAAGAAGATCTGGTTGCAGAAAGTTGCGACGGAGACG…
>Lepsat_Lesat.0059s1092.1
ATGAGATCTCTTCTCCTTATACTGTCACTCATTTGCTTTTTCTCGCAAACAGCACTTTCATGGAAGAAGGAAGAGTTTCGCAGCTGCGACCAAACTCCATTTTGTAAACGCGCTCGATCCCGTACTCCCGGGACGTGTTCTCTAATTGTTGGCGATGTTTCCATCACCGATGGAGATCTCGTGGCGAAGCTACTACCGAAAGTCTCTAATCAAGGTGATGGGGATCAGATCAAGCCGTTGGTTCTCTCTATCTCGGTTTACAGAGATGGGATCGTGCGGCTAAGAGTCGATGAGGACCATTCGCTGAATCCACCGAAGAAGAGATTCAGAGTTCCTGATGTGGTAGTGTCTGAATTCGAGGAGAAGAAGATCTGGCTGCAGAAAGTTGCGACGGAGACG…
>Noccae_OVBC01001778.1_FGenesh4.1
ATGAGATCTCTTCTCTTCGTACTATCACTCATTTGCTTGGCCTCTCAAACAGTACTTTCATGGAAGAAGGAGGAGTTTCGCAGCTGTGACCAAACTCCATTCTGTAAACGCGGTCGATCCCGTACTCCCGGCGCGTGTTCTCTGATTGTCGGCGATGTTACCATCACCGATGGAGATCTCGTAGCGAAGCTTTTACCGAAAACCCCTAATCAAGGCGATGGGGATCAGATCAAGCCGTTGATTCTATCTCTCTCGGTGTACAAGGATGGGATCGTGCGGCTCAGGATAGATGAGGACCATACGCTGAACCCGCCGAAGAAGAGATTCAGAGTTCCTGATGTGGTAGTGTCCGAGTTCGATGAGAAGAAGATCTGGCTGCAGAAAGTAGCGACGGAGACG…
>Rorisl_Roisl.0024s0261.1
ATGAGATCTCTTCTCTTTGTACTATCACTCATTTGCTTCTGCTCACAATCAGCACTTTCATGGAAGAAGGAGGAGTTTCGCAGCTGCGACCAAACTCCATTCTGTAAACGCGCTCGATCCCGAGCTCCCGGCGCGTGTTCTCTAATTGTGGACGATGTTTCCAACACCGATGGAGATCTCGTAGCTAAGATTCTACCGAAAACGCCTAATCAAGGCGATGGTAATCAGATCAAGCCGTTGATTCTATCTCTCTCGGTTTACACAGATGGGATCGTGCGGCTCAGGATCGATGAGGACCATTCGTTGAACCCGCCGAAGAAGAGATTCAGAGTTCCTGATGTGGTAGTGTCAGAGTTCGAGGAGAAGAAGATCTGGCTGCAGAAAGTAGCGACGGAGACA…
>Rapsat_Rsa1.0_00782.1_g00014.1
ATGATCTCACATACACCGCCGCTTCATCTTCTCCAATGGTGTTCTTACATCAAAGAACATAGCTCCTCCAGAAGCTGTCTCCTTTCCCAATGCTCGATTGACAGAATCATCCTCTTGGGACAAACTTCGGGTCCAAAATCTGCACTGGTAGAACCGTTGAATCAAAAGGCAGAGATTGAGATGGGACCACTGAGAATGGGTGGGCCTGTAGCTTCCTCAGGTACCAAGGTCTTGACTATCCGTAAACCAGGTGTTCGAGTGGACCAGGACTGGACCATAAAGATTCTGTGA
>Rapsat_Rsa1.0_05428.1_g00001.1
ATGAGATCTCTTCTCTTTGTACTATCACTTCTCTGCTTCGCCTCGCAAACAGCACTTTCATGGAAGAAGGAGGAGTTTCGCAGCTGCGACCAGACTCCGTTCTGCAAACGCGCTCGATCCCGTGCTCCCGGCGCGTGTTCTCTCATCGCAAGCGATGTCTCAATCGCCGATGGAGATCTCGTAGCCAAGCTCCTACCGAAAATCGCTAACCAAAGCGACGAGGATCAGATCAAGCCGTTGGTGCTCTCTCTCTCGGTTTACACCGATCGGATCGTGCGGCTAAGGATCGACGAGGACCACACGCTGAATCCGCCGAAGAAGAGGTTCAGAGTTCCCGACGTGGTGGTCTCCGAGCTCGAGGAGAAGAAGATCTGGCTGCAGAAAGTAGCCACGGAGACG…
>Rapsat_Rsa1.0_30358.1_g00001.1
ATGCTCATCATGACACCAAAAGACGAGAGCCTTGGTTGTTTGGAACTCATGAGAGATGCCATACATACTCGTTACACGCTGCTCCCATACTTTTACACGTTATTTAGAGAAGCCAATGTCACAGGAGTGCCTGTTGTACGTCCGTTATGGATGGAATTCCCACAAGAAGAAGCTACGTTTAGTAACGATGAAGCTTTCATGGTCGGTAATGCTCTATTAGTGCAAGGAGTTTACACTAAGGGAACAACACATGCTTCCGTGTATTTGCCTGGCAAAGAATCATGGTATGACCTGAGAAACGGAAAGACATACGT
>Rapsat_Rsa1.0_32476.1_g00001.1
ACACATGCTTCCGTGTATTTGCCTGGCAAAGAATCATGGTATGACCTGAGAAACGGAAAGACATACGTTGGAGGCAAGACTTACAAGATGGATGCTCCGGAAGAAAGCATTCCTGCGTTTCAAAGGGCGGGAACTATTATCCCGAGGAAAGACCGGTTCAGGCGAAGTTCTTCTCAAATGGACAATGATCCTTATACTCTGGTGGTAGCTTTGAACAGTGCTCAAGAAGCAGATGGTGAACTCTACATTGACGATGGAAAAAGCTTCGAATTCAGACGAGGCTCTTACATCCACCGCCGCTTCGTCTTCTCCAATGGTGTTCTTACATCAACGAACTTAGCTCCTTCACAAGGTAGCCTCTCTTCCCGATGTTTAATCGACAGAATTATCCTCTTGGGA…
>Rapsat_Rsa1.0_65433.1_g00001.1
TGGGATACCTGAACACGCCACTAGCTTCGCCTTGAAGCCTACCAAGGGTCCTGGAGTCGAGGAGTCTGAACCTTATAGGCTGTTTAACCTAGATGTCTTTGAATACGAGCACGAATCACCGTTTGGGCTTTACGGATCGATCCCATTCATGGTTTCACATGGGAAGTCTGGTAAAACTTCGGGGTTTTTCTGGTTGAATGCTGCGGAGATGCAGATTGATGTCTTGGCTAATGGATGGGATGCAGAGAGTGGTATTGCATTGCCGTCGAGTGAGAGTAGGATTGATACGTTGTGGATGAGCGAGGCGGGGATTGTGGACACGTTCTTTTTCGTAGGGCCTGAGCCGAAGG
>Rapsat_Rsa1.0_67437.1_g00001.1
GCTTGTTATGCGTGAAGAAGGAAAAGATAGGCCTTTTGTATTGTCAAGAGCAATCTTTCCTGGTACTCAAAGATACGGAGCGATTTGGACTGGAGATAACACAGCCGAATGGGAACACCTTAGAGTCTCTATTCCAATGTTATTGACACTGGGTCTAACTGGAATCACATTCTCAGGAGCTGATATTGGTGGATTCTTTGGAAATCCTGAACCAGAACTACTAGTTAGGTGGTACCAAGTCGGTGCTTACTATC
>Sinalb_Sialb.0063s0002.1
ATGAGATCTCTTCTCTTTGTACTATCACTCATTTGCTTCTGCTCACAAACATCACTTTCATGGAAAAAGGAAGAGTTTCGAAGCTGCGATCAAACTCCATTCTGTAAACGCGCTCGATCCCGTGCCCCCGGCGCGTGTTCTCTCATCGTAAGCGATGTTTCCATCACCGATGGAGATCTCGTAGCTAAGCTCCTACCGAAAATCGCTAACCAAAGCGATGAGGAACAGATCAAGCCGTTAGTGCTCTCTCTCTCGGTTTACACCGATGGGATCGTGCGGCTCAGGATCGATGAGGACCACACGCTGAACCCGCCGAAGAAGAGATTCAGAGTTCCCGATGTGGTAGTGCCCGAGCTCGATGAGAAGAAGATCTGGCTGCAGAAAGTAGCTACGGAGACG…
>Schpar_CM001188.1_FGenesh1385.1
ATGAGATCCCTTCTCTTTGTACTATCACTCATTTGCTTTGGCTCACAAACAGCACTTTCATGGAAGAAGGAGGAGTTTCGCAGCTGTGAACAAACTCCATTTTGTAAACGAGCTCGATCCCGTGCTCCCGGCGCGTGTTCTCTGATTGTAGGCGATGTTTCCATCACCGATGGAGATCTCGTAGCGAAGCTCCTACCCAAAATTCCTAATCAAGGTGATGGGCATCAGATCAACCCGTTGGTACTCTCTCTCTCGGTTTATAAGGATGGGATCGTGCGGCTCAGGATCGACGAGGACCATTCGCTGAACCCCCCGAAGAAGAGATTCAGAGTGCCTGATGTGGTAGTTTCTGAGTTCGAGGAGAAGAAGATCTGGCTGCAGAAAGTAGCGACAGAGACG…
>ArathaSHA_ATSHA-5G88520.1
ATGATCGTCTTCCTCAGTGTTGTATTTTGGCTTTCCTCATTGCTTCCTCAATCTAAGGATTTCCATGAACAAGGAACTAAAATGAGATCTCTTCTCTTTGTACTATCACTCATTTGCTTTTGCTCTCAAACAGCACTTTCATGGAAGAAGGAAGAGTTTCGCAGCTGTGACCAAACTCCATTTTGTAAACGCGCTCGATCTCGTACTCCCGGCGCGTGTTCTCTAATTGTCGGCGATGTTTCCATCACTGATGGAGATCTCGTAGCGAAGCTTCTACCGAAAGCGCCTAATCAAGGCGATGGGGATCAGATCAAGCCGTTGATTCTTTCTCTCTCAGTTTACAAGGATGGGATCGTGCGGCTTAAAATCGATGAGGACCATTCGTTGAACCCGCCGAAG…
>Sisiri_KE154359.1_FGenesh184.1
ATGAGATCTCTTCTGTTTATACTATCACTCATTTGCTTCGGGTCGCACACAGCACTTTCATGGAAGAAGGAGGAGTTTCGCAGCTGTGACCAAACTCCATTCTGTAAACGCGCTCGATCTCGTACTCCAGGCGCGTGTTCTCTGATCGTCGGCGATGTTTCCATCACCGATGGAGATCTCGTAGCGAAGCTTCAACCGAAAGTCTCTAACCAAGGCGATGGGGATCAGATCAAGCCGTTGGTACTCTCTCTCTCGGTTTATAAGGATGGGATCGTGCGGCTCAGGATCGACGAGGACCATTCGCTGAACCCGCCGAAGAAGAGATTCAGAGTGCCTGATGTAGTAGTGTCCGAGCTCGAGGAGAAGAAGATCTGGCTTCAGAAAGTGGCGACGGAGACG…
>Stapin_Stapi.12237s0001.1
ATGAGATCTCTTCTCTTTATACTATCACTAATTTGCTTCAGCTTACAAACAGCACTTTCATGGAAGAAAGAGGAGTTTCGCAGCTGCAACCAAACTCCATTCTGTAAACGCGCTCGATCCCGTACTCCCGGCGCGTGTTCTCTGACTGTAGGCGATGTTTCCATCACTGATGGAGATCTCGTAGCGAAGCTACTACCGAAAATCCCCAATCAAGGAGATGGGGATCAGATCAAGCCGTTAGTACTCTCTCTCTCTGTTTATACGGATGGGATCGTGCGGCTCAGGATCGATGAGGACCATTCGCTGAACCCGCCGAAGAAGAGATTCAGAGTGCCTGATGTGGTAGTGTCCGAGTTCGAGCAGAAGAAGATCTGGCTGCAGAAATTAGCGACGGAGACG…
>Thlarv_Thlar.0004s0435.1
ATGAGATCTCTTCTCTTTATACTATCACTCATTTGCGTAGGATCCCAAACAGCACTTTCATGGAAGAAGGAGGAGTTTCGCAGCTGTGACCAAACTCCATTTTGTAAACGCGCTCGATCTCGCACTCCAGGTGCGTGTTCTCTGATTGTAGGCGATGTTTCCATCACCGATGGAGATCTTGTAGCGAAGCTTCTACCGAAAATTGCTAATCAAGGCGACGGGGATCAGATCAAGCCGTTGGTACTCTCTCTCTCGGTTTATACGGATGGGATCGTGCGGCTCAGGATCGATGAGGACCATTCGCTGGAACCGCCGAAGAAGAGGTTCAGAGTTCCTGATGTGGTAGTGTCCGAGTTCGAGGGGAAGAAGATCTGGCTGCAGAAAGTAGCGACGGAGACG…

## Sheet: Bxl1
Back to index
>Aetara_KE150594.1_FGenesh24.1
ATGTCTTACATTACAAAACCATTTTTAATCACACTATTATTCCTCTTATGTTTAATTCAATGGTCCGAATCATCTCGTCCACTCTTTGCATGTGACCCGGCAAACGGTTTAACCCGAACGCTCCGGTTTTGTCGAGTAAATGTACCGATCCACGTAAGAGTTCAAGATTTAATCGGACGGTTAACGTTACAAGAAAAGATACGTAATCTTGTGAACAATGCCGCGGCCGTGCCACGTCTAGGCATTGGAGGGTATGAGTGGTGGTCCGAGGCGTTACACGGTGTGTCGAATATCGGTCCAGGGGCTAAGTTTGGTGGTGCGTTCCCCGGAGCTACTAGTTTCCCTCAAGTCATCACAACCGCTGCTTCTTTTAATCAGACTCTTTGGGAAGAGATCGGA…
>Arahal_Araha.35185s0003.1
ATGTCTTGTAATAATAAAGCATTATTAATCGGCAACAAAGTCGTCGTTATACTTGTATTCCTCTTATGCTTGGTTCACTCATCAGAGTCACTTCGGCCACTCTTTGCATGCGACCCGGCAAACGGGTTAACCCGGACGCTCCGGTTCTGTCGGGTCAATATACCGATCCATGTGAGAGTTCAAGATTTGATCGGAAGGCTCACGTTGCAGGAGAAGATCCGCAACCTCGTCAACAATGCTGCCGCCGTTCCACGCCTCGGTATTGGAGGCTATGAGTGGTGGTCCGAGGCTCTCCACGGCGTTTCCGACGTTGGTCCTGGCTCTAAGTTCGGTGGTGCTTTTCCCGGCGCCACCAGCTTCCCTCAGGTCATAACTACCGCAGCTTCTTTCAACCAGTCT…
>Aralyr_AL8G23010.t1
ATGTCTTGTAATAATAAACCATTATTAATCGGCAACAAAGTCGTCGTTATACTTGTATTCCTCTTATGTTTGGTTCACTCGTCAGAGTCACTTCGCCCACTCTTTGCATGCGACCCGGCAAACGGGTTAACCCGGACGCTCCGGTTCTGTCGGGTCAATGTACCGATCCATGTGAGGGTTCAAGATTTGATCGGAAGGCTCACGTTGCAGGAGAAGATCCGCAACCTCGTCAACAATGCTGCCGCCGTTCCACGCCTTGGTATTGGAGGATATGAGTGGTGGTCCGAGGCTCTCCACGGCGTTTCCGACGTTGGTCCTGGCTCTAAGTTCGGTGGTGCTTTTCCCGGCGCCACCAGCTTCCCTCAGGTCATCACCACCGCAGCTTCTTTCAACCAGTCT…
>Araalp_lcl_CM002876.1_KFK26586.1_18671
ATGTCTTCTAATAACAAAGCATTATTAACCAGCAACAAAGTCGTAGTTATACTTTTATTCCTCCTAAGTTTGGTTCACTCGTCAGAGTCACTTCGGCCGCTCTTTGCATGCGACCCCGCTAACGGCTTGACCCGGACGCTCCGGTTCTGTCGAGTCAATGTACCAATCCATGTGAGGGTTCAAGATTTGATCGGACGGCTCACGTTGCAAGAGAAAATCCGCCTCCTCGTCAACAATGCTGCGGCCGTGCCACGTCTGGGTATCGGAGGCTATGAGTGGTGGTCAGAGGCTCTCCATGGAGTTTCCGACGTTGGTCCCGGCGCTAAGTTCGGTGGTGCGTTTCCCGGTGCCACCAGCTTCCCTCAAGTCATCACCACGGCAGCTTCTTTTAACCAGTCT…
>ArathaCOL_AT5G49360.1
ATGTCTTGTTATAATAAAGCACTATTGATCGGCAACAAAGTCGTCGTTATACTTGTATTCCTCTTATGTTTGGTTCACTCGTCAGAGTCACTTCGACCACTGTTTGCATGTGATCCAGCAAACGGGTTAACCCGGACGCTCCGGTTCTGTCGGGCCAATGTACCGATCCATGTGAGAGTTCAAGATTTGCTCGGAAGGCTCACGTTGCAGGAGAAGATCCGCAACCTCGTCAACAATGCTGCCGCCGTACCACGTCTCGGTATTGGAGGCTATGAGTGGTGGTCCGAGGCTCTCCACGGCATTTCCGACGTTGGTCCAGGCGCTAAGTTCGGTGGTGCTTTTCCCGGTGCCACCAGCTTCCCTCAGGTCATCACCACCGCAGCTTCTTTCAACCAGTCT…
>Bislae_OVAU01004619.1_FGenesh2.1
ATGTCTTGTAATCACAAAGCCATGGTTATACTTGTGTTCATATTATGTTTGGTTCACTCGTCAGAATCATTACGGCCACCATTTGCATGTGACCCAGCAAACGGGTTAACCCGGACTCTCCGATTCTGTCGGGTCAATTTACCGATCCACGTAAGGGTTCAAGATTTGATCGGACGGCTCACGTTGCAAGAGAAGATTCGGAACCTCGTCAATAATGCTGCCGCCGTGCCACGTCTCGGTATTGGAAGATATGAGTGGTGGTCTGAGGCTCTTCACGGAGTTTCTGATGTCGGTTACGGTGTTAAGTTCGGTGGTGCTTTTCCCGGCGCCACTAGCTTTCCTCAAGTTATCACCATGGCGGCTTCTTTTAATCAGTCTCTTTGGGAAGAGATCGGACGG…
>Bislae_OVAU01034817.1_FGenesh1.1
ATGACTCATGGTTTGGATTTGGATTGTGGTCCGTTTTTAGCGATTTTCACGGAAGGTGCGGTGAAGAAAGGATTGTTGACGGAAAATGACGTCAATTTAGCACTTGCGAATACTTTAACGGTCCAGATGAGACTAGGCATGTTTGATGGCAATCTTGGGCCATACGCTAATCTTGGGCCTAGAGATGTTTGTACACCATCCCATAAACATTTAGCTCCAGAAGCGGCCCATCAAGAAATTTTTTTTCTCAAAAACTCTGGTCGTTCTCTTCCACTCTCTCCCAGACGCCACCGCCAACTATCACTCAACCTTCACTCATACTTTGACTCATAA
>Bislae_OVAU01061628.1_FGenesh1.1
ATGTGTTCTTACAACCAAGTTAATGGAAAGCCAACTTGTGCTGATGAAAATCTCTTAAAGAACACTATTCGTGGTCAATGGCATCTCAGTGGATATATTGTCTCAGATTGCGACTCTGTTGATGTTTTCTTTAACCAACAACATTACACCACCACTCCGGAGGAAGCCGCCGCAGCCTCTATTAAAGCC
>Bislae_OVAU01072322.1_FGenesh1.1
ATGTGTTTTTTTATTTCGACAGGGAAAGCATGCTCCTATACGACGCCGTTGCAAGGGATCTCAAGATACGCAAAAACGATTCACCAAGCTGGTTGCGCAGGCGTAGCTTGCAAAGGGAACCAAGGATTTGGTGGTGCAGAGGTGGCGGCGCGTGAAGCTGACGCGACGGTTCTTGTGATGGGATTAGACCAGTCGATAGAAGCAGAGACACGAGATAGAACCGGTCTACTTTTACCAGGTTACCAACAAGAACTTGTGAATCGTGTGGCTCAAGTCTCCAAAGGTCCAGTCATTTTGGTACTTATGAGTGGTGGGCCCATCGATGTAACTTTCGCTAAGAACAATCCACGTGTTGCTGCTATTATCTGGGCCGGGTATCCGGGTCAAGCGGGTGGAGCT…
>Bislae_OVAU01101460.1_FGenesh1.1
ATGAGACTAGGCATGTTTGATGGCAATCTTGGACCATACGCTAATCTTGGGCCTAGAGATGTTTGTACACCAGCCCATAAACATTTAGCTCTAGAAGCGGCCCATCAAGGAATTGTTCTTCTCAAAAACTCTGGTCGTTCTCTTCCACTCTCTCTCAGACGCCACCGGACCGTCGCCGTGATTGGACCAAACTCCGATGTCACTGAGACGATGATAGGGAATTATGCAGGTGAATAA
>Braole_Parent=BolC2t11795H;Name=BolC2t11795H
ATGTCTTGTAATAATAATTCATTATTAACCGGCAACAGAGTCGTAGTTGTACTTGTATTCCTCTTATGCTTGGTTCACTCATCAGAGTCACTACGGCCACTGTTTGCATGCGACCCGGCAAACGGGTTAACCCGAACACTCCGGTTCTGTCGCGTCAATGTACCGGTCCACGCGAGGGTTCAAGATTTGATCGGACGGCTCACGTTGCAGGAGAAGATCCGCCTCCTCGTCAACAATGCCGCCGCTGTGCCACGCCTCGGTATTGGAGGCTATGAGTGGTGGTCAGAGGCTCTCCACGGAGTTTCTGACGTTGGTCCCGGTGCTAAATTCGGTGGTGCTTTTCCCGGTGCCACCAGCTTCCCTCAGGTCATCACCACCGCAGCTTCTTTCAATCAGTCT…
>Braole_Parent=BolC2t11815H;Name=BolC2t11815H
ATGGTATCCACAAGACTACGTGACAGAACTTCCAATCACAATAATGGCAATGAGAGCATCTGGAAACTACCCAGGAAGGACTTACAGTTTCTACAAAGGTCCAGTGGTGTTTCCATTTGGGTTCGGTTTAAGTTACACTACCTTCACTCACACTCAATTATCAAAGTGTCTCATGCCAACTGTGAAACGTTTCCAAAAATGCATCTCCACGTTGAAGTGTCAAACACCGGTGAATTTGATGAAACTCACACGGTGTTCGCCTTTGCCGAGCAGCCGGAGAACGGGATAAAAGGATTGGGTGTGAACAAGCAGTTGGTAGCGTTTCATGTCACGGCAGGGGGTCAAAACGCACCGTTCAAGTCGATATTGAGGCTTGCAAGCATCTTGGTGTAG
>Braole_Parent=BolC7t44515H;Name=BolC7t44515H
AAAAAAAACACAAACATCACATATTATACATATAAACATAAAAAACACATATATAAGATGTCTTGTAATAAGAAATCATTATTATTCGGCAACAAAGTCGTAGTTATACTTGTATTCCTCTTATGTTTGGTTCACTCATCCGAATCACTTCGACCATTGTTTGCATGCAACCCAGCAAACGGGTTAACCCGGACGCTCCGGTTCTGTCGGGTCAATGTACCGATCCACGTTAGGGTTCAAGACTTAATCGGACGTCTCACGTTGCAGGAGAAGATCCGCCTCCTCGTCAACAATGCCGCCGCTGTGCCACGCCTTGGCATTGGAGGCTATGAGTGGTGGTCCGAGGCTCTTCATGGCGTTTCCGACGTCGGTCCCGGAGCTAAGTTCGGTGGTGCTTTC…
>Braole_Parent=BolC9t53442H;Name=BolC9t53442H
ATGTTACATATAATCAACACACGCATACACAAAACACAAATATATAAGATGTCTTGTAATAACAGAGAATTATTAATCGGCAACAAAGTCGTAGTTACACTTGTATTTCTCTTATGTTTGGTTCACTCATCAGAATCACTTCGGCCACTGTTTGCATGCGACCCGGCAAATGAGTTAACCCGGACACTCCGGTTCTGTCAGGTCAATATACCGGTCCGCCTGAGGGTTCAAGACTTGATCGGACGGCTCACCTTGCAGGAGAAGATCCGCCTCCTCGTCAACAATGCCGCCGCTGTGCCACGCCTCGGTATTGGAGGCTATGAGTGGTGGTCCGAGGCTCTCCACGGCGTTTCTGACGTTGGTCCCGGAGCTAAGTTCGGTGGTGCGTTTCCCGGTGCC…
>Brajun_BjuA000478
ATGGTATCCACAAGACTACGTGACAGAACTTCCAATTACAATAATGGCAATGAGAGCATCTGGAAACTACCCAGGAAGGACTTTCAGTTTCTACAAAGGTCCAGTGGTGTTTCCATTTGGGTTCGGTTTAAGTTACACTACCTTCACTCACAGTTTGGCTCAAAACCCACTAGCTCAATTATCAAAGTGTCTCATGCCAACTGTGAAACGTTTCCAAAAATTCCTCTCCACGTTGAAGTGTCAAACACCGGTGAATTTGATGAAACTCACACGGTGTTCGCCTTTGCCGAGCCGCCGGAGAACGGGATAAAAGGATTGGGTGTGAACAAGCAGTTGGTAGCGTTTGAGAAGGTTCATGTCACGGCAGGGGGTCAAAACGCACCGTTCAAGTCGATATTG…
>Brajun_BjuA023836
ATGAGAGCATATGGAAATTACCCAGGAAGAACCTACAGATTTTACAAAGGTCCAGTGGTGTTTCCATTTGGGTTCGGTTTAAGTTACACCACCTTCACTCATAGTTTGGCCCAAAACCCATTAGCCCAACTATCAGTTTCATCCTACAAACTCAACTCTGCCATTTTCAACTCCTCATCTAACTCTATCAAAGTGTCTCATGCCAACTGTGGAACGTTTCCAAAAGTGCCTCTCCATGTTGAAGTATCAAACACAGGTGAATTTGACGGA
>Brajun_BjuA023837
ATGTCTTGTAATAAGAAATCATTATTATTCGGGAACAAAGTCGTAGTTGTACTTGTATTCCTCTTCTGTTTGGTTCACTCATCAGAATCACTTCGACCATTGTTTGCATGCAACCCATCAAACGGGTTAACCCGGACGCTCCGGTTCTGTCGGGTCAATGTACCGATCCACGTTAGGGTTCAAGACTTAATCGGACGTCTCACGTTGCAGGAGAAGATCCGCCTCCTCGTCAACAATGCCGCCGCTGTGCCACGCCTTGGCATTGGAGGCTATGAGTGGTGGTCCGAGGCTCTTCATGGCGTTTCCGACGTTGGTCCCGGAGCTAAGTTCGGTGGTGCTTTCCCTGGTGCCACCAGCTTCCCTCAGGTCATCACCACCGCAGCTTCTTTCAACCAGTCT…
>Brajun_BjuA031822
ATGTCTTGTAATAACAGAGAATTATTAATCGGCAACAAAGTCGTAGTTACACTTGTATTTCTCTTATGTTTGGTTCACTCATCAGAATCACTTCGGCCACTGTTTGCATGCGACCCGGCAAATGAGTTAACCCGGACACTCCGGTTCTGTCAGGTCAATATACCGGTCCGCGTGAGGGTTCAAGACTTGATTGGACGGCTCACCTTGCAGGAGAAGATCCGCCTCCTCGTCAACAATGCCGCCGCTGTGCCACGCCTCGGTATTGGAGGCTATGAGTGGTGGTCCGAGGCTCTCCACGGCGTTTCTGACGTTGGTCCCGGAGCTAAGTTCGGTGGTGCGTTTCCCGGTGCCACCAGCTTTCCTCAGGTCATCACCACCGCAGCTTCTTTCAACCAGTCT…
>Brajun_BjuB004523
ATGTCTATTGATAACAGAGCATTATTAATCGGCAACGAAGTCGTAGTTTCACTTGTATTTCTCTTATGTTTGGTTCACTCATCAGAATCACTTCGGCCATTGTTTGCATGCGACCCGGCAAATGGTTTAACCCGGACACTCCGGTTCTGTCAGGTCAATATACCGGTCCACGTGAGGGTTCAAGACTTGATAGGACGGCTCACGTTGCAGGAGAAGATCCGCCTCCTCGTTAACAATGCTGCCGCTGTGCCACGCATCGGTATTGGAGGCTATGAGTGGTGGTCCGAGGCTCTCCACGGCGTTTCCGACGTTGGTCCAGGAACTAAGTTTGGTGGTGCGTTTCCTGGTGCCACCAGCTTCCCTCAGGTCATCACCACCGTAGCTTCTTTCAACCAGTCT…
>Brajun_BjuB042952
ATGTCTTTTAATAATAAAGCATTATTAATCGACAACAAAGTCGTAGTTATACTTGTATTCCTCTTATGCTTGGTTCACTCATCAGAGTCACTACGGCCACTGTTTGCATGCGACCCGGCAAACGGGTTAACCCGAACACTCCGTTTCTGTCGCGTCAATGTACCGGTCCACGTAAGGGTTCAAGACTTGATCGGACGGCTCACGTTGCAGGAGAAGATCCGCCTCCTGGTCAACAATGCCGCCGCTGTTCCACGCCTCGGTATTGGAGGCTACGAGTGGTGGTCCGAGGCTCTCCACGGTGTTTCTGACGTCGGTCCCGGAGCTAAGTTTGGTGGTGCTTTTCCTGGTGCCACCAGTTTCCCTCAGGTCATCACCACCGCAGCTTCTTTCAACCAGTCT…
>Brajun_BjuB042956
ATGTCTTTTAATAATAAAGCATTATTAATCGACAACAAAGTCGTAGTTATACTTGTATTCCTCTTATGCTTGGTTCACTCATCAGAGTCACTACGGCCACTGTTTGCATGCGACCCGGCAAACGGGTTAACCCGAACACTCCGTTTCTGTCGCGTCAATGTACCGGTCCACGTAAGGGTTCAAGACTTGATCGGACGGCTCACGTTGCAGGAGAAGATCCGCCTCCTGGTCAACAATGCCGCCGCTGTTCCACGCCTCGGTATTGGAGGCTACGAGTGGTGGTCCGAGGCTCTCCACGGTGTTTCTGACGTCGGTCCCGGAGCTAAGTTTGGTGGTGCTTTTCCTGGTGCCACCAGTTTCCCTCAGGTCATCACCACCGCAGCTTCTTTCAACCAGTCT…
>Brajun_BjuB037524
ATGTCTTGTAATAAGAAACCATTATTATTCCGCAACAAAGTCGTAGTTATACTTGTATTCCTCTTATGTTTGGTTCACTCATCAGAATCACTTCGACCATTGTTTGCATGCAACCCAGCAAACGGGTTAACCCGGACGCTCCGGTTCTGTCGGGTCAATGTACCGATCCACGTTAGGGTTCAAGACTTAATCGGACGTCTCACGTTGCAGGAGAAGATCCGCCTCCTCGTCAACAATGCCGCCGCTGTGCCACGGCTTGGTATTGGAGGCTATGAGTGGTGGTCTGAGGCTCTCCATGGCGTTTCCGATGTCGGCCCTGGAGCTAAGTTCGGTGGTGCTTTCCCTGGTGCCACCAGCTTCCCTCAGGTCATCACCACAGCAGCTTCTTTCAACCAGTCT…
>Branig_CM004491.1_FGenesh4903.1
ATGGCTAACATATATTCAGAGAGGTTGAAGGTCACCCAACAAGATTTAGAGGACACATACAATGTACCGTTCAGAGCTTGTGTTTACGAGGGAAATGTCGCGAGTGTTATGTGTTCGTACAATCAAGTCAATGGAAAGCCAACTTGTGCTGATGAAAATCTCTTAAAGAACACTATTCGTGGTCAGTGGCAACTCAACGGGTACATTGTATCAGATTGTGACTCCGTGGATGTTTTCTTCAATCAACAACACTACACGGCAACTCCGGAAGAAGCTGCCGCTGCCTCAATTAAAGCTGGTCTTGATTTGGATTGTGGGCCGTTTTTGGCGATCTTCACCGAAGGAGCTGTGAAGAAAGGATTGTTGATAGAGAATGACATTAATTTAGCACTTACCAAT…
>Branig_CM004491.1_FGenesh4904.1
ATGTCTATTGATAACAGAGCATTATTAATCGGCAACAAAGTCGTAGTTTCACTTGTATTTCTCTTATGTTTGGTTCACTCATCAGAATCACTTCGGCCATTGTTTGCATGCGACCCGGCAAATGGTTTAACCCGGACACTCCGGTTCTGTCAGGTCAATATACCGATCCACGTGAGGGTTCAAGACTTGATCGGACGGCTCACGTTGCAGGAGAAGATCCGCCTCCTCGTTAACAATGCTGCCGCTGTGCCACGCCTCGGTATTGGAGGCTATGAGTGGTGGTCCGAGGCTCTCCACGGCGTTTCCGACGTTGGTCCCGGAGCTAAGTTTGGTGGTGCGTTTCCTGGTGCCACCAGCTTCCCTCAGGTCATCACCACCGTAGCTTCTTTCAACCAGTCT…
>Brarap_Parent=BraA02t08786Z;Name=BraA02t08786Z
ATGTCTTGTAATAATAATTCATTATTAACCGGCAACAAAGTCGTAGTTGTACTTGTATTCCTCTTATGCTTGGTTCACTCATCAGAGTCACTACGGCCACTGTTTGCATGCGACCCGGCAAACGGGTTAACCCGAACACTCCGCTTCTGTCGCGTCAATGTACCGGTCCACGCGAGGGTTCAAGATTTGATCGGACGGCTCACGTTGCAGGAGAAGATCCGCCTCCTCGTCAACAATGCCGCCGCTGTGCCACGCCTCGGTATTGGAGGCTATGAGTGGTGGTCCGAGGCTCTCCACGGAGTTTCTGACGTTGGTCCCGGTGCTAAGTTCGGTGGTGCATTTCCCGGTGCCACCAGCTTCCCTCAGGTCATCACCACCGCAGCTTCTTTCAATCAGTCT…
>Brarap_Parent=BraA02t08795Z;Name=BraA02t08795Z
ATGGTATCCACAAGACTACGTGACAGAACTTCCAATTACAATAATGGCAATGAGAGCATCTGGAAACTACCCAGGAAGGACTTTCAGTTTCTACAAAGGTCCAGTGGTGTTTCCATTTGGGTTCGGTTTAAGTTACACTACCTTCACTCACAGTTTGGCTCAAAACCCACTAGCTCAATTATCAAAGTGTCTCATGCCAACTGTGAAACGTTTCCAAAAATTCCTCTCCACGTTGAAGTGTCAAACACCGGTGAATTTGATGAAACTCACACGGTGTTCGCCTTTGCCGAGCCGCCGGAGAACGGGATAAAAGGATTGGGTGTGAACAAGCAGTTGGTAGCGTTTGAGAAGGTTCATGTCACGGCAGGGGGTCAAAACGCACCGTTCAAGTCGATATTG…
>Brarap_Parent=BraA06t26752Z;Name=BraA06t26752Z
ATGTCTTGTAATAAGAAATCATTATTATTCGGAAACAAAGTCGTAGTTGTACTTGTATTCCTCTTCTGTTTGGTTCACTCATCAGAATCACTTCGACCATTGTTTGCATGCAACCCATCAAACGGGTTAACCCGGACGCTCCGGTTCTGTCGGGTCAATGTACCGATCCACGTTAGGGTTCAAGACTTAATCGGACGTCTCACGTTGCAGGAGAAGATCCGCCTCCTCGTCAACAATGCCGCCGCTGTGCCACGCCTTGGCATTGGAGGCTATGAGTGGTGGTCCGAGGCTCTTCATGGCGTTTCCGACGTTGGTCCCGGAGCTAAGTTCGGTGGTGCTTTCCCTGGTGCCACCAGCTTCCCTCAGGTCATCACCACCGCAGCTTCTTTCAACCAGTCT…
>Brarap_Parent=BraA09t36116Z;Name=BraA09t36116Z
ATGTTACATATAATCAACACACGCATACACAAAACACAAATGTATAAGATGTCTTGTAATAACAGAGAATTATTAATCGGCAACAAAGTCGTAGTTACACTTGTATTTCTCTTATGTTTGGTTCACTCATCAGAATCACTTCGGCCACTGTTTGCATGCGACCCGGCAAATGAGTTAACCCGGACACTCCGGTTCTGTCAGGTCAATATACCGGTCCGCGTGAGGGTTCAAGACTTGATTGGACGGTTCACCTTGCAGGAGAAGATCCGCCTCCTCGTCAACAATGCCGCCGCTGTGCCACGCCTCGGTATTGGAGGCTATGAGTGGTGGTCCGAGGCTCTCCACGGCGTTTCTGACGTTGGTCCCGGAGCTAAGTTCGGTGGTGCGTTTCCCGGTGCC…
>Branap_BnaA02g30890D
ATGGTATCCACAAGACTACGTGACAGAACTTCCAATTACAATAATGGCAATGAGAGCATCTGGAAACTACCCAGGAAGGACTTTCAGTTTCTACAAAGGTCCAGTGGTGTTTCCATTTGGGTTCGGTTTAAGTTACACTACCTTCACTCACAGTTTGGCTCAAAACCCACTAGCTCAATTATCAAAGTGTCTCATGCCAACTGTGAAACGTTTCCAAAAATTCCTCTCCACGTTGAAGTGTCAAACACCGGTGAATTTGATGAAACTCACACGGTGTTCGCCTTTGCCGAGCCGCCGGAGAACGGGATAAAAGGATTGGGTGTGAACAAGCAGTTGGTAGCGTTTGAGAAGGTTCATGTCACGGCAGGGGGTCAAAACGCACCGTTCAAGTCGATATTG…
>Branap_BnaA02g30740D
ATGTTTTGTAATAATAATTCATTATTAACCGGCAACAAAGTCGTAGGTGTACTTGTATTCCTCTTATGCTTGGTTCACTCATCAGAGTCACTACGGCCACTGTTTGCATGCGACCCGGCAAACGGGTTAACCCGAACACTCCGGTTCTGTCGCGTCAATGTACCGGTCCACGCGAGGGTTCAAGATTTGATCGGACGGCTCACGTTGCAGGAGAAGATCCGCCTCCTCGTCAACAATGCCGCCGCTGTGCCACGCCTCGGTATTGGAGGCTATGAGTGGTGGTCCGAGGCTCTCCACGGAGTTTCTGACGTTGGTCCCGGTGCTAAGTTCGGTGGTGCATTTCCCGGTGCCACCAGCTTCCCTCAGGTCATCACCACCGCAGCTTCTTTCAATCAGTCT…
>Branap_BnaA09g03310D
ATGTTACATATAATCAACACACGCATACACAAAACACAAATGTATAAGATGTCTTGTAATAACAGAGAATTATTAATCGGCAACAAAGTCGTAGTTACACTTGTATTTCTCTTATGTTTGGTTCACTCATCAGAATCACTTCGGCCACTGTTTGCATGCGACCCGGCAAATGAGTTAACCCGGACACTCCGGTTCTGTCAGGTCAATATACCGGTCCGCGTGAGGGTTCAAGACTTGATTGGACGGTTCACCTTGCAGGAGAAGATCCGCCTCCTCGTCAACAATGCCGCCGCTGTGCCACGCCTCGGTATTGGAGGCTATGAGTGGTGGTCCGAGGCTCTCCACGGCGTTTCTGACGTTGGTCCCGGAGCTAAGTTCGGTGGTGCGTTTCCCGGTGCC…
>Branap_BnaC09g02680D
ATGTTACATATAATCAACACACGCATACACAAAACACAAATATATAAGATGTCTTGTAATAACAGAGAATTATTAACCGGCAACAAAGTCGTAGTTACATTTGTATTTCTCTTATGTTTGGTTCACTCATCAGAATCACTTCGGCCACTGTTTGCATGCGACTCGGCAAATGAGTTAACCCGGACACTCCGGTTCTGTCAGGTCAATATACCGGTCCGCATGAGGGTTCAAGACTTGATCGGACGGCTCACCTTGCAGGAGAAGATCCGCCTCCTCGTCAACAATGCCGCCGCTGTGCCACGCCTCGGTATTGGAGGCTATGAGTGGTGGTCCGAGGCTCTCCACGGCGTTTCTGACGTTGGTCCCGGAGCTAAGTTCGGTGGTGCGTTTCCCGGTGCC…
>Branap_BnaC02g39150D
ATGATAGGAGGTAAACTACCATTGACATGGTATCCACAAGACTACGTGACAGAACTTCCAATCACAATAATGACAATGAGAGCATCTGGAAACTACCCAGGAAGGACTTACAGTTTCTACAAAGGTCCAGTGGTGTTTCCATTTGGGTTCGGTTTAAGTTACACTACCTTCACTCACAGTTTGGCTCAAAACCCACTAGCTCAATTATCAAAGTGTCTCATGCCAACTGTGAAACGTTTCCAAAAATGCATCTCCACGTTGAGTGTCAAACACCGGCTTGCAAGCATCTTGGTGTAG
>Branap_BnaC02g39030D
ATGTCTTGTAATAATAATTCATTATTAACCGGCAACAGAGTCGTAGTTGTACTTGTATTCCTCTTATGCTTGGTTCACTCATCAGAGTCACTACGGCCACTGTTTGCATGCGACCCGGCAAACGGGTTAACCCGAACACTCCGGTTCTGTCGCGTCAATGTACCGGTCCACGCGAGGGTTCAAGATTTGATCGGACGGCTCACGTTGCAGGAGAAGATCCGCCTCCTCGTCAACAATGCCGCCGCTGTGCCACGCCTCGGTATTGGAGGCTATGAGTGGTGGTCAGAGGCTCTCCACGGAGTTTCTGACGTTGGTCCCGGTGCTAAATTCGGTGGTGCTTTTCCCGGTGCCACCAGCTTCCCTCAGGTCATCACCACCGCAGCTTCTTTCAATCAGTCT…
>Branap_BnaC07g27160D
ATGTCTTGTAATAAGAAATCATTATTATTCGGCAACAAAGTCGTAGTTATACTTGTATTCCTCTTATGTTTGGTTCACTCATCCGAATCACTTCGACCATTGTTTGCATGCAACCCAGCAAACGGGTTAACCCGGACGCTCCGGTTCTGTCGGGTCAATGTACCGATCCACGTTAGGGTTCAAGACTTAATCGGACGTCTCACGTTGCAGGAGAAGATCCGCCTCCTCGTCAACAATGCCGCCGCTGTGCCACGCCTTGGCATTGGAGGCTATGAGTGGTGGTCCGAGGCTCTTCATGGCGTTTCCGACGTCGGTCCCGGAGCTAAGTTCGGTGGTGCTTTCCCTGGTGCCACCAGCTTCCCTCAGGTCATCACCACCGCAGCTTCTTTCAACCAGTCT…
>Boestr_Bostr.15774s0067.1
ATGTCTTGTAATAATAAAGCAGTATTAGTTGGCAACAAAGTCGTCGTTATACTTGTATTCCTCTTATGTTTGGTTCACTCGTCAGAGTCACTTCGGCCACTCTTTGCATGCGACCCGGCAAACGGGTTAACCCGGACGCTCCGGTTTTGTCGAGTCAATGTACCGATCCACGTGAGAGTTCAAGATTTGATCGGAAGGCTCACGTTGCAGGAGAAGATCCGCAACCTCGTCAACAATGCTGCCGCTGTGCCACGCCTCGGTATTGGAGGCTATGAGTGGTGGTCCGAGGCTCTCCATGGCGTTTCCGACGTTGGTCCTGGCTCTAAGTTCGGTGGTGCTTTTCCCGGCGCCACAAGCTTCCCTCAGGTCATCACCACCGCAGCTTCTTTCAACCAGTCT…
>Capbur_MPGU01000043.1_FGenesh497.1
ATGTCTTGTAATAATAATGGTAAAGCATTTTTAGTCGGCAACAAAGTCGTCGTTATACTTGTATTCCTCTTATGTTTGGTTCGCTCGTCAGAGTCACTTCGCCCACTCTTTGCATGCGACCCGGCAAACGGGTTAACCCGAACGCTCAGGTTCTGTCGGGTTAATGTACCGATCCACGTCAGGGTTCAAGATTTGATCGGAAGGCTCACGTTGCAAGAGAAGATCCGCAACCTCGTCAACAATGCTGCCGCCGTGCCACGACTCGGTATTGGAGGCTACGAGTGGTGGTCAGAAGCTCTCCACGGTGTTTCTGACGTTGGTCCCGGTGCTAGGTTCGGTGGTGCTTTTCCAGGCGCCACAAGCTTCCCTCAGGTCATCACCACCGCAGCTTCTTTCAAC…
>Capbur_MPGU01000368.1_FGenesh71.1
ATGTCTTGTAATAACAATAGTAAAGCATTTTTAGTCGGCAACAAAGTCGTCGTTATACTTGTATTTCTCTTATGTTTGGTTCACTCGTCAGAGTCACTTCGCCCACTCTTTGCATGCGACCCGGCAAACGGGCTAACCCGAACGCTCCGGTTCTGTCGGGTTAATGTACCGATCCACGTGAGAGTTCAAGATTTGATCGGAAGGCTCACGTTGCAAGAGAAGATCCGCAACCTCGTCAACAATGCTGCGGCCGTGCCACGACTCGGTATTGGAGGTTACGAGTGGTGGTCAGAAGCTCTCCACGGTGTTTCAGACGTTGGTCCCGGTGCTAAGTTTGGTGGTGCTTTTCCAGGCGCCACAAGCTTCCCTCAGGTCATCACAACCGCAGCTTCTTTCAAC…
>Capbur_MPGU01006142.1_FGenesh4.1
ATGTCTTGTAATAACAATAGTAAAGCATTTTTAGTCGGCAACAAAGTCGTCGTTATACTTGTATTTCTCTTATGTTTGGTTCACTCGTCAGAGTCACTTCGCCCACTCTTTGCATGCGACCCGGCAAACGGGCTAACCCGAACGCTCCGGTTCTGTCGGGTTAATGTACCGATCCACGTGAGAGTTCAAGATTTGATCGGAAGGCTCACGTTGCAAGAGAAGATCCGCAACCTCGTCAACAATGCTGCGGCCGTGCCACGACTCGGTATTGGAGGTTACGAGTGGTGGTCAGAAGCTCTCCACGGTGTTTCAGACGTTGGTCCCGGTGCTAAGTTTGGTGGTGCTTTTCCAGGCGCCACAAGCTTCCCTCAGGTCATCACAACCGCAGCTTCTTTCAAC…
>Carhir_CARHR182170.1
ATGTCTTGTAATAATAAAGCATTACTAATCGGCAACAAAGTCGTAGTTATACTTGTATTACTCTTATGTTTAGTTCACTCGTCAGTGTCACTTCGGCCATTGTTTGCATGTGACCCAGCAAACGGATTGACCCGAACGCTCCGGTTCTGTAGGGTCGGTTTGCCGATCCATGTGAGGGTTCAAGATTTGATCGGACGGCTCACGTTGCAAGAGAAGATCCGCAACCTAGTCAATAATGCTGCCGCCGTGCCCCGCCTAGGTATTGGAGGTTATGAATGGTGGTCGGAGGCTCTTCACGGCGTTTCTGACGTCGGACCTGGAGCTAAGTTCGGTGGTGCTTTTCCTGGCGCCACCAGCTTCCCTCAGGTTATCACCACCGCAGCTTCTTTCAACCAATCT…
>Capgra_Cagra.6296s0001.1
ATGTCTTGTAATAACAATAGTAAAGCATTTTTAGTCGGCAACAAAGTCGTCGTTATACTCATATTCCTCTTATGTTTGGTTCACTCGTCAGAGTCACTTCGCCCACTCTTTGCATGCGACCCGGCAAACGGGTTAACCCGAACGCTCAGGTTCTGTCGGGTTAATGTACCGATCCACGTGAGGGTTCAAGATTTGATCGGAAGGCTCACGTTGCAAGAGAAGATCCGCAACCTCGTCAACAATGCTGCCGCCGTTCCACGACTCGGTATTGGAGGCTACGAGTGGTGGTCAGAAGCTCTCCACGGTGTTTCTGACGTTGGTCCCGGTGCTAGGTTCGGTGGTGCTTTTCCAGGCGCCACAAGCTTCCCTCAGGTCATCACCACCGCAGCTTCTTTCAAC…
>Capcru_Carub.0008s0926.1
ATGTCTTGTAATAATAATGGTAAAGCATTTTTAGTCGGCAACAAAGTCGTCGTTATACTTGTATTCCTCTTATGTTTGGTTCGCTCGTCAGAGTCACTTCGCCCACTCTTTGCATGCGACCCGGCAAACGGGTTAACCCGAACGCTCAGGTTCTGTCGGGTTAATGTACCGATCCACGTCAGGGTTCAAGATTTGATCGGAAGGCTCACGTTGCAAGAGAAGATCCGCAACCTCGTCAACAATGCTGCCGCCGTGCCACGACTCGGTATTGGAGGCTACGAGTGGTGGTCAGAAGCTCTCCACGGTGTTTCTGACGTTGGTCCCGGTGCTAGGTTCGGTGGTGCTTTTCCAGGCGCCACAAGCTTCCCTCAGGTCATCACCACCGCAGCTTCTTTCAAC…
>Camsat_Csa18g018780.1
ATGTCTTGTAATAATAATAAAGCATTTTTAGTCGGCAACAAAGTCGTCGTATTACTTGTATTCCTCTTATGTTTGGTTCACTCGTCAGAGTCACTTCGGCCACTCTTTGCATGCGACCCGGCAAACGGGTTAACCCGGACGCTCCGGTTCTGTCGGGTTAACGTACCGATCCACGTGAGGGTTCAAGATTTGATCGGAAGGCTCACGTTGCAGGAGAAGATCCGTAACCTCGTCAACAATGCTGCCGCCGTGCCACGCCTCGGTATAGGAGGCTATGAGTGGTGGTCCGAGGCCCTTCACGGCGTTTCCGACGTTGGTCCCGGCGCTAAGTTCGGTGGTGCTTTTCCTGGCGCCACAAGCTTCCCACAAGTCATCACCACGGCCGCTTCTTTCAACCAG…
>Camsat_Csa02g035520.1
ATGTGCTCGTACAACCAAGTCAATGGAAAGCCCACATGTGCTGATGAAAATCTCTTAAAGAACACTATTCGTGGTCAGTGGCGTCTCAATGGGTACATTGTCTCAGATTGTGACTCTGTTGATGTTTTCTTCAACCAACAACATTACACCAACAGTCCGGAAGAAGCCGCCGCCGCCTCTATTAAAGCCGGTTTGGACTTGGACTGCGGGCCGTTTTTGGCGATTTTCACGGAAGGTGCAGTGAAGAAAGGATTGTTAACGGAGAATGACATCAATTTAGCACTTGCTAATACATTAACGGTCCAGATGAGACTTGGTATGTTTGATGGCAATCTTGGACCTTATGCTAACCTAGGGCCAAGAGATGTTTGTACTCCGGCCCATAAACATTTAGCTCTT…
>Camsat_Csa11g078680.1
ATGAGAAAAAACATCGTGTCGTTTTCAGGTTTGGACTTGGACTGCGGGCCGTTTTTGGCGATTTTCACGGAAGGTGCGGTGAAGAAAGGATTGCTAACGGAGAATGACATCAATTTAGCACTTGCTAATACATTAACGGTCCAGATGAGACTTGGTATGTTCGATGGCAATCTTGGACCGTATGCTAATCTAGGGCCAAGAGACGTTTGTACTCCGGCCCATAAACATTTAGCTCTTGAAGCGGCTCATCAAGGGATTGTTCTTCTCAAAAACTCCGGTCGGTCTCTTCCACTCTCCCCTAGGCGCCATCGCACCGTCGCCGTGATTGGACCAAACTCCGATGTCACCGAGACTATGATCGGAAACTATGCAGGGAAAGCGTGCTCCTATACGACGCCG…
>Dipstr_Distr.0016s0047.1
ATGTCTTGTAATACTAATAAACCATTGTTTCTTATACTTGTATTCTTCTTATTATCTTTGGTTCACTCGTCAGAATCACTTCGGCCACTTTTTGCATGCGACCCATCAAACGGTTTGACCCGGACGCTCCGGTTCTGCCGGGTTAATGTGCCGGTCCACGTGAGGGTTCAAGACTTAATCGGACGTCTCACGTTGCAAGAGAAGATCCAACTCCTCGTCAACAATGCTGCCCCCGTGCCACGCCTCGGCATCGGAAGATATGAGTGGTGGTCTGAGGCTCTCCATGGCGTTTCCGACGTTGGACCCGGCGCCAAGTTCGGTGGTGCTTTCCCCGGCGCCACCAGTTTCCCTCAGGTCATCACTACCGCTGCTTCTTTCAACCAGTCTCTCTGGGAAGAG…
>Eutesa_Thhalv10003681m
ATGTCTTTTAATATTAAAGCATTGTTAACTGGCAACAGACTCGTAGTTACACTTCTATTATTCCTCTTATGTTTGGTTCACCCGTCCGAGTCACTTCGCCCACTGTTTGCATGCAACCCCGCAAACGGGTTAACCCGGACGCTCCGGTTCTGTCGGGTCAATGTACCGGTCCACGTGAGGGTTCAAGATTTGATTGGACGGCTCACGTTGCAGGAGAAGATCCGCCTCCTCGTTAACAATGCTGCCGCCGTGCCACGCCTTGGTATTGGAGGCTATGAGTGGTGGTCGGAGGCTCTACACGGCGTTTCTGACGTCGGTCCCGGCGCTAAGTTCGGTGGTGCTTTTCCCGGTGCCACCAGCTTCCCTCAGGTCATCACCACCGCAGCTTCTTTCAACCAG…
>Eruves_Eruve.0252s0054.1
ATGTATTGTAATAAGAAATCATTATTATTCAGCAACAAAGTCGTAGTTATACTTGCATTCCTCTTATGTCTGGTTCACTCATCAGAATCACTTCGACCACTGTTTGCATGCAACCCAGCAAACGGGTTAACCCGGACGCTTCGGTTCTGTCGGGGGAATGTACCGATTCACGTGAGGGTTCAAGACTTGATCGGACGTCTCACGTTGCAGGAGAAGATCCGCCTTCTCGTCAACAATGCCGCCGCTGTGCCACGCCTTGGTATTGGAGGCTATGAGTGGTGGTCCGAGGCTCTTCATGGCGTTTCTGACGTCGGTCCCGGAGCTAAGTTCGGTGGTGCTTTCCCTGGTGCCACCAGCTTTCCTCAGGTCATCACCACCGCAGCTTCTTTCAACCAGTCT…
>Eruves_Eruve.0069s0052.1
ATGAAAACTAAAAACACAAACATCACAAGTTATACATATAAATACAAACATACACAACACATATATATATATAAGATGTCTTGTAATAATAATTCATTATTAATCGGCAACAAAGTCGTAGTAATACTTGTATTCGTCTTATGTCTGGTTCACTCATCAGAGTCACTTCGGCCATTGTTTGCATGCGACCCAGCAAATGGGTTAACCCGAACACTCCGGTTTTGTCGCGTCAATGTACCGGTCCACAAGAGGGTTCAAGACTTGATCGGACGGCTCACGTTACAGGAGAAGATCCGCCTCCTTGTCAACAATGCCGCCGCTGTGCCACGCCTCGGTATTGGAGGCTATGAGTGGTGGTCCGAGGCTCTTCACGGTGTTTCTGACGTTGGTCCTGGAGCT…
>Eruves_Eruve.5005s0003.1
ATGTCCTGTTATAACCGAGCATTATTAATCGGCAACAAAGTCGTAGTTACACTTGTATTTCTCTTATGCTTAGTTCACTCATCAGAATCACTTCGGCCACTGTTTGCATGCGACCCGGCAAATGGGTTAACCCGGACACTCCGGTTCTGTCAGGTCAATATACCGGTCCACGTGAGGGTTCAAGACTTGATCGGACGGCTCACGTTGCAGGAGAAGATCCGCCTCCTCGTTAACAATGCCGCCGCTGTGCCACGCCTCGGTATTGGAGGCTATGAGTGGTGGTCCGAGGCTCTCCACGGCGTTTCCGATGTTGGCCCCGGAGCTAAGTTTGGTGGTGCGTTTCCTGGTGCCACCAGCTTCCCTCAGGTCATCACCACCGCTGCTTCTTTCAATGAGTCT…
>Eruves_Eruve.0132s0010.1
ATGTCTTGTTATAACAGAGCATTATTAATCGTTAACAAAGTCGTAGTTATACTTGTATTTCTCTTATGTTTGGTTCACTCATCAGAATCACTTCGGCCACTGTTTGCATGCGACCCGGCAAATGGGTTAACCCGGACACTCCGATTCTGTCAGGTTAATATACCAGTCCACGTGAGGGTTCAAGACTTGATCGGACGGCTCACGTTGCAGGAGAAGATCCGCCTCCTCGTTAACAATGCCGCCGCTGTGTCACGCCTCGGTATTGGAGGCTATGAGTGGTGGTCCGAGGCTCTCCACGGCGTTTCCGACGTTGGTCCCGGAGCTAAGTTTGGTGGTGCGTTTCCTGGTGCCACCAGCTTCCCTCAGGTCATCACCACCGCAGCTTCTTTCAACGAGTCT…
>Isatin_Isati.1644s0011.1
ATGTCTTGTAGTACTAAAGCATTATTAATGGGGAACAAAGTCGTAGCTATACTTGTATTCCTCTTATGTTTGGTTCACTCATCAGAATCACTTCGGCCATTGTTTGCATGCGACCCGGCAAACGGGTTAACACGGACGCTCCGGTTCTGTCGGGTCAATGTACCGGTCCACGTGAGGGTTCAAGACTTGATTGGACGGCTCACGTTGCAGGAGAAGATCCGCCTCCTCGTCAACAATGCTGCCGCTGTGCCTCGCCTCGGTATTGGAGGCTATGAGTGGTGGTCCGAGGCTCTCCACGGCGTTTCCGACGTTGGTCCCGGAGCTAAGTTTGGTGGTGCTTTTCCTGGTGCCACCAGCTTCCCACAGGTCATCACCACCGCAGCTTCTTTCAACCAGTCT…
>Isatin_Isati.2257s0013.1
ATGTCTTGTAATACTAAAGCATTATTAATGGGCAACAAAGTCGTAGCTATACTTGTATTCCTCTTATGTTTGGTTCACTCATCGGAATCACTTCGGCCACTGTTTGCATGCGACCCGGCAAACGGGTTAACACGGACGCTCCGGTTCTGTCGGGTCAATGTACCGGTCCACGTGAGGGTTCAAGACTTGATTGGACGGCTTACGTTGCAGGAGAAGATCCGCCTCCTCGTCAACAATGCTGCCGCTGTGCCTCGCCTCGGTATTGGAGGCTATGAGTGGTGGTCCGAGGCTCTCCACGGCGTTTCCGACGTTGGTCCCGGAGCTAAGTTTGGTGGTGCTTTTCCTGGTGCCACCAGCTTCCCTCAGGTCATCACCACCGCAGCTTCTTTCAACCAGTCT…
>Isatin_Isati.0442s0026.1
ATGTCTTGTAATACTAAAGCATTATTAATGGGCAACAAAGTCGGAGCTATACTTGTATTCCTCTTATGTTTGGTTCACTCATCAGAATCACTTCGGCCACTGTTTGCATGCGACCCGGCAAACGGGTTAACACGGACGCTCCGGTTCTGTCGGGTCAATGTACCGGTCCACGTGAGGGTTCAAGACTTGATTGGACGGCTTACGTTGCAGGAGAAGATCCGCCTCCTCGTCAACAATGCTGCCGCTGTGCCTCGCCTCGGTATTGGAGGCTATGAGTGGTGGTCCGAGGCTCTCCACGGCGTTTCCGACGTTGGTCCCGGAGCTAAGTTTGGTGGTGCTTTTCCTGGTGCCACCAGCTTCCCTCAGGTCATCACCACCGCAGCTTCTTTCAACCAGTCT…
>Lunann_Luann.0060s0037.1
ATGTTTTGTAATAATAAAGGATTATTAAGCGGCAACAAAGTCGTAGTACTTCTTATATTCCTCTTATGTTTGGTTCACTCATCAGAGTCACTTCGGCCATTGTTTGCATGCGATCCAGCAAACGGGTTAACCCGGTCGCTCCGGTTCTGCCGGGTAAACAAACCGATCCACGTGAGGGTTCAAGACTTGATCGGACGACTAACGTTGCAGGAGAAAATCCGCCTCCTCGTCAACAATGCTGCCGCCGTGCCACGCCTTGGTATTGGAGGCTATGAGTGGTGGTCCGAGGCTCTACACGGCGTTTCCAACGTCGGTCCCGGCACTAAGTTCGGTGGTGCTTTTCCCGGCGCCACTAGCTTCCCCCAGGTCATCACCACCGCAGCTTCTTTCAACCAGTCT…
>Lunann_Luann.0016s0108.1
ATGTCTTTTACTAATAAAAAATTATTAATCGGCAACAAAGTCGTAGTTATACTTGTATTCTTCTTATGTTTGGTTCATTCATCAGAGTCACTTCGCCCACTGCTTGCATGTGACCCGGCAAACGGGTTGACTCGGACGCTCCGGTTCTGCCGGGCCAATCTACCGATCCATGTAAGGGTTCAAGACTTGATCGGACGGCTCACGTTGCAGGAGAAGATCCGCAACCTCGTCAACAATGCTGCCGCCGTGCCACGTCTCGGTATTGGAGGCTATGAGTGGTGGTCTGAGGCTCTCCACGGTGTTTCTGATGTTGGTCCCGGTGCTAAGTTTGGTGGTGCTTTTCCCGGCGCCACTAGCTTCCCTCAGGTCATCACCACCGCAGCTTCTTTCAACCAGTCT…
>Lunann_Luann.0187s0006.1
ATGTCTTGTAATAATAAAGCATTGTTAATCGACAACAAAGTTGTAGTACTACTTATATTCCTTTTATGTTTGGTTCACTCATCAGAATCACTTCGGCCATTGTTTGCATGCAATCCAGCAAACGGGTTAACCCGGTCGCTTCGGTTCTGCCGGGTCCACGTACCGATCCACGTGAGGGTTCAAGACTTGATCGGACGGCTCACGTTGCAGGAGAAAATCCGCCTCCTCGTCAACAATGCTGCCGCCGTGCCACGCCTTGGTATTGGAGGCTATGAGTGGTGGTCTGAGGCTCTACACGGCGTTTCCGACGTCGGTCCCGGCACTAAGTTCGGTGGTGCTTTTCCCGGCGCCACTAGCTTCCCTCAGGTCATCACCACCGCAGCTTCTTTCAACCAGTCT…
>Leaala_KE157061.1_FGenesh49.1
ATGTACAATGGAGGCGCCGCCGGTCTAACATATTGGAGTCCAAATGTGAATATACTAAGGGACCCTCGTTGGGGCCGAGGCCAAGAAACTCCCGGTGAAGACCCTGTTGTCGCCGGAAAATACGCCGCCAGCTACGTCCGAGGACTTCAAGGAGCCGTCGGTAACCGCCTCAAAGTCGCCGCATGTTGCAAACACTACACTGCTTATGATCTTGATAACTGGAATGGTGTCGACCGTTTCCATTTTAACGCTAAGATAAAATTCTAA
>Leaala_KE157061.1_FGenesh50.1
ATGAGACTTGGTATGTTTGATGGCAATCTTGGGCCATATGCTAATCTTGGACCAAGAGATGTTTGCACTCCGGCCCATAAACATTTAGCTCTTGAAGCGGCCCATCAAGGAATTGTTCTTCTCAAAAATATTGGCCGTTCTCTTCCACTATCTCCTAGACGTCACCGCACTGTCGCCGTGATTGGACCTAACTCCGATGTTACCGAAACTATGATCGGAAACTATGCAGGAAAAGCATGTTCTTATACGACACCGTTACAAGGAATATCAAGATACGCAAGGACACTGCACCAAGCTGGTTGTGTCGGCGTTGCTTGTATAGGGAACCAAGGATTTGGTGCGGCGGAGGCGGCAGCACGTGAAGCTGATGCGACGGTTCTTGTTATGGGATTGGATCAG…
>Lepsat_Lesat.0014s0516.1
ATGTCTTGTAAAAACACACACAAAGTCATAGTTTCATTTATACTTCTCTTATTCTTTGTCCACTCATCAGAATCACTTCGACCACTCTTTGCATGTGACCCAGCAAACGGTTTAACCCGGTCACTCCGGTTCTGTCGAGTCAATCTACCAATCCATGTGAGAGTTCAAGACTTAATCGGACGGCTCACGTTGCAGGAAAAGATCCGTAACCTCGTTAACAATGCAGCCGCCGTGCCACGGCTCGGTATTGGTGGTTATGAGTGGTGGTCCGAGGCTCTACACGGCGTTTCTGATGTAGGTCCTGGTTCTAAGTTCGGTGGTGCTTTTCCCGGAGCTACAAGCTTTCCACAAGTTATAACCACCGCAGCTTCTTTTAATCAGTCTCTATGGGAAGAGATC…
>Lepsat_Lesat.0152s0017.1
ATGTCTTGTAAAAATACACACAAAGTCATAGTTTCACTTATACTTCTCTTGTTCTTTGTTAACTCATCAGAATCACTTCGACCACTCTTTGCATGTGACCCAGCAAACGGTTCAACCCGGTCACTCCGGTTCTGTCGAGTCAATTTACCAATCCATGTGAGAGTTCAAGACTTGATCCAACGGCTCACGTTGCAGGAAAAGATTCGCAATCTCGTTAACAATGCAGCCGCCGTGCCACGGCTCGGTATCGGTGGTTATGAGTGGTGGTCCGAAGCTCTTCACGGCGTTTCTGATGTAGGTCCTGGTTCTAAGTTCGGTGGTGCTTTTCCCGGAGCCACAAGCTTTCCACAAGTTATCACCACCGCAGCTTCTTTTAATCAGTCTCTTTGGGAAGAGATT…
>Noccae_OVBC01002948.1_FGenesh3.1
ATGTCTTGTAGAAGTAAAGCATTATTATTCGGCAACAAAATCATGGTTATACTTATATTCCTCTTATGTTTAGTTCACTCATCAGAGTCGCTTCGTCCACTGTTTGCATGCGATCCGGCAAACGGGTTAACTCGGACGCTCCGGTTCTGTCGGGTCAATGTGCCAGTCCACGTGAGGGTTCAAGACGTGATCGGACGGCTCACGTTGCAGGAGAAGATCCGCCTCCTCGTCAACAATGCTGCCTCCGTGCCACGCCTTGGTATTGGAGGCTATGAGTGGTGGTCGGAGGCTCTCCACGGCGTTTCCGACGTTGGTCCTGGCGCTAAGTTCGGTGGTGCTTTTCCAGGTGCAACCAGCTTTCCTCAGGTCATCACCACCGCAGCTTCTTTCAACCAGTCT…
>Rorisl_Roisl.0036s0090.1
ATGTCTTGTAAGAATAAAGCATTATTAATCGACAACAAAGTCGTAGTTATACTTGTATTCCTCTTATGTTTGGTTCACTCATCAGAGTCATTTCGGCCATTGTTTGCATGTGACCCAGCAAACGGGCTGACCCGGACTCTCCGGTTCTGTAGGGTCAATCTGCCCATCCATGTGAGGGTTCAAGACTTGATCGGACGGCTCACGTTGCAGGAGAAGATCCGCAACCTCGTCAACAATGCTGCGGCCGTGCCACGCCTCGGTATTGGAGGTTATGAATGGTGGTCGGAGGCTCTCCACGGTGTTTCTGACGTCGGTCCCGGCTCTAAGTTCGGTGGTGCTTTTCCTGGGGCCACCAGCTTCCCTCAAGTTATCACCACCGCAGCTTCTTTCAACCAATCT…
>Rapsat_Rsa1.0_00028.1_g00033.1
ATGTCTCCTAATAATAATTCATTATTAACCGGCAACAAAGTCGTAGTTGTACTTGTGTTCCTCTTATACTTGGTTCACTCATCAGAGTCACTACGGCCACTGTTTGCATGCGACCCGGCAAACGGGTTAACCCGAACACTCCGATTCTGTCGCGCCAATGTACCGGTCCACGTAAGGGTTCAAGACTTGATCGGACGGCTCACGTTGCAGGAGAAGATCCGTCTCCTCGTCAACAATGCCGCCGCTGTTCCACGCCTCGGTATTGGAGGCTATGAGTGGTGGTCCGAGGCTCTCCACGGTGTTTCTGACGTCGGTCCCGGAGCTAAGTTTGGTGGTGCTTTTCCTGGTGCCACCAGTTTCCCTCAGGTCATAACCACGGCAGCTTCTTTCAACCAGTCT…
>Rapsat_Rsa1.0_00045.1_g00061.1
ATGTCTTGTAATAACAGAGCATTATTAATCGGCAACAAAGTCGTAGTTACACTCGTATTTCTCTTATGTTTGGTTCACTCATCACAATCACTTCGGTCACTGTTTGCATGCGACCCGGCAAATGGGTTAACCCGGACACTCCGGTTCTGTCAGGGCAATATACCGGTCCACACGAGGGTTCAAGACTTGATCGGACGGCTCACGTTGCAGGAGAAGATCCGCCTCCTCGTTAACAATGCCGCCGCTGTGCCACGCCTCGGTATTGGAGGCTATGAGTGGTGGTCCGAGGCTCTCCACGGCGTTTCCGATGTTGGTCCCGGAGCTAAGTTTGGTGGTGCCTTTCCTGGTGCCACCAGCTTCCCTCAGGTCATCACCACCGCAGCTTCTTTCAACCAGTCT…
>Rapsat_Rsa1.0_00045.1_g00063.1
ATGGGAGATGGAGTCGATCGAAGATTGGATGCAGCTATCGATGAGGCTTTCGAATCATGTTTTGAAGATACATACAACAGCATCGTCGAGAATCAAACAAATAACCGAAGGAAACGTGCATATATCGAACGACACCGCGAAACGGGCCACGACCGTCTATGGAATGACTATTTTAGTGAAAATCCAATATTTGAGGCTCCTATATTCAGACGCCGTTTCCGCATGAACAAGCCACTATTCTTGACTATTGTCGATCGGCTCTCACAAAACATTCCATTCTTTCAACAAAGAAGAGATGCAGTCGGAAGGTTAGGTCTATCTGCACTACAAAAGTGTACGGCAGCTATTCGTATGCTTGCTTATGGCTGTGCCGCTGACGCCGTTGACGAATATCTCCGA…
>Rapsat_Rsa1.0_00761.1_g00004.1
ATGTCTTAATCACTTCGACCATTGTTTGCATGCAACCCAGCAAACGGGTTAACCCGGACGCTCCGGTTCTGTCGGGTCAATGTACCGATCCACGTGAGGGTTCAAGACTTAATCGGACGTCTCACGTTGCAGGAGAAGATCCGCCTCCTCGTCAACAATGCCGCTGCTGTGCCACGCCTTGGTATTGGAGGCTATGAGTGGTGGTCCGAGGCTCTTCATGGCGTCTCCGACGTCGGTCCCGGAGCTAAGTTTGGTGGTGCTTTCCCCGGTGCTACCAGCTTCCCTCAGGTCATCACCACAGCAGCTTCTTTCAACCAGTCTCTATGGGAAGAGATCGGACGGGTTGTGTCTGATGAGGCAAGAGCTATGTACAATGGAGGCGTAGCCGGTTTGACGTAT…
>Sinalb_Sialb.0157s0149.1
ATGTCTTGTAATAAGAAACCATTATTATTCGGCAACAAAGTCGTAGTTATACTTGTATTCCTCTTATGTTTGGTTCACTCATCAGAATCACTTCGACCACTGTTCGCATGCAACCCAGCAAACGGGTTAACCCGGACGCTCCGGTTCTGTCGGGTCAATGTACCGATCCACGTGAGGGTTCAAGACTTAATCGGACGTCTCACGTTGCAGGAGAAGATCCGCCTCCTCGTCAACAATGCCGCCGCTGTGCCACGCCTTGGTATTGGAGGCTATGAGTGGTGGTCCGAGGCTCTCCATGGCGTTTCCGATATCGGCCCTGGAGCTAAGTTCGGTGGTGCTTTCCCTGGTGCCACCAGCTTCCCTCAGGTCATCACCACAGCAGCTTCTTTCAACCAGTCT…
>Sinalb_Sialb.0940s0001.1
ATGTCTTGTAATAATAATTCATTATTAACCGGCAACAAAGTCGTAGTTGTACTTGTATTCCTCTTATGCTTGGTTCACTCATCAGAGTCACTTCGGCCACTGTTTGCATGCGACCCGACAAACGGGTTAACCCGAACACTCCGGTTCTGTCGCGTCAATGTACCGGTCCACGTAAGGGTTCAAGACTTGATTGGTCGGCTCACGTTGCAGGAGAAGATCCGCCTCCTGGTCAACAATGCCGCCGCTGTTCCACGCCTCGGTATTGGAGGCTATGAGTGGTGGTCCGAGGCTCTCCACGGAGTTTCTGACGTTGGTCCCGGAGCTAAGTTCGGTGGTGCGTTTCCCGGTGCCACCAGCTTCCCTCAGGTCATCACCACCGCAGCTTCTTTCAACCAGTCT…
>Sinalb_Sialb.0124s0038.1
ATGTCTTGTAATAACAGAGAATTGTTAATCGGCAACAAAGTATTAGTTACACTTGTATTTCTCTTATGTTTGGTTCACTCATCAGAATCACTTCGGCCACTGTTTGCATGTGACCCGGCAAATGGGTTAACCCAGACACAACGGTTCTGTCAGGTCAATATACCGGTCCACGTGAGGGTTCAGGATTTGATCGGACGGCTCACGTTGCAAGAGAAGATCCGCCTCCTCGTTAACAATGCTGCCGCTGTGCCACGCCTCGGTATTGGAGGCTATGAGTGGTGGTCCGAGGCTCTCCACGGCGTTTCCGACGTTGGTCCTGGAGCTAAGTTTGGTGGTGCATTTCCTGGGGCCACCAGCTTCCCTCAGGTCATCACCACCGCAGCTTCTTTCAACCAGTCT…
>Schpar_CM001188.1_FGenesh2150.1
ATGTCTTGTAAGAAAGCATTATTAATCGGCAACAAAGCCGTAGTTATACTTGTTTTCCTCCTATGTTTGGTTCACTCTTCAGAGTCACTTCGCCCACTATTTGCATGCGACCCGGCAAACGGGTTAACCCGGACGCTCCGGTTCTGTCGGGTAAACGTGCCGGTCCACGTGAGGGTTCAAGACTTGATCGGACGGCTCACATTGCAGGAGAAGATCCGCCTCCTCGTCAACAATGCTGCCGCCGTGCCACGCCTCGGTATTGGAGGCTATGAGTGGTGGTCCGAGGCTCTCCACGGCGTTTCTGACGTCGGTCCAGGCGCTAAGTTCGGTGGTGCTTTTCCCGGTGCCACCAGCTTCCCTCAGGTCATCACCACCGCAGCTTCTTTCAACCAGTCTCTC…
>Schpar_CM001192.1_FGenesh5178.1
ATGTCTTGTAAGAAAGCATTATTAATCGGCAACAAAGCCGTAGTTATACTTGTTTTCCTCCTATGTTTGGTTCACTCTTCAGAGTCACTTCGCCCACTATTTGCATGCGACCCGGCAAACGGGTTAACCCGGACGCTCCGGTTCTGTCGGGTAAACGTGCCGGTCCACGTGAGGGTTCAAGACTTGATCGGACGGCTCACATTGCAGGAGAAGATCCGCCTCCTCGTCAACAATGCTGCCGCCGTGCCACGCCTCGGTATTGGAGGCTATGAGTGGTGGTCCGAGGCTCTCCACGGCGTTTCTGACGTCGGTCCAGGCGCTAAGTTCGGTGGTGCTTTTCCCGGTGCCACCAGCTTCCCTCAGGTCATCACCACCGCAGCTTCTTTCAACCAGTCTCTC…
>ArathaSHA_ATSHA-5G72540.1
ATGTCTTGTTATAATAAAGCACTATTGATCGGCAACAAAGTCGTCGTTATACTTGTATTCCTCTTATGTTTGGTTCACTCGTCAGAGTCACTTCGACCACTGTTTGCATGTGATCCAGCAAACGGGTTAACCCGGACGCTCCGGTTCTGTCGGGCCAATGTACCGATCCATGTGAGAGTTCAAGATTTGCTCGGAAGGCTCACGTTGCAGGAGAAGATCCGCAACCTCGTCAACAATGCTGCCGCCGTACCACGTCTCGGTATTGGAGGCTATGAGTGGTGGTCCGAGGCTCTCCACGGCATTTCCGACGTTGGTCCAGGCGCTAAGTTCGGTGGTGCTTTTCCCGGTGCCACCAGCTTCCCTCAGGTCATCACCACCGCAGCTTCTTTCAACCAGTCT…
>Sisiri_KE155957.1_FGenesh172.1
ATGTCTTGTAATAATAAATCATTATTATTGGGCAACAAAGTCGTAGTTATACTTGTGTTCCTCTTATGTTTGGTTCACTCATCAGAATCACTTCGGCCACTGTTTGCATGCGACCCGGCAAACGGGTTAACCCGGACGCTCCGGTTCTGTCGGCTCAATGTACCGGTCCACGTGAGGGTTCAAGACTTAATCGGACGTCTCACCTTGCAGGAGAAGATCCGCCTCCTCGTCAACAATGCCGCCGCTGTGCCACGCCTCGGTATTGGAGGCTATGAGTGGTGGTCCGAGGCTCTCCACGGCGTTTCCGACGTCGGACCCGGAGCTAAGTTCGGTGGTGCTTTTCCCGGTGCCACCAGCTTCCCTCAGGTCATCACCACCGCAGCTTCTTTCAACCAGTCT…
>Stapin_Stapi.2697s0007.1
ATGTCTTGTAATAAATCATTATTATTGGGCAACAAAGTCGTAGTTATACTTGTATTCCTCTTATGTTTGGTTCACTCATCAGAATCACTTCGGCGACTGTTTGCATGCGACCCGGCAAACGGGTTAACCCGGACGTTCCGGTTCTGTCGGGCCAATGTACCGGTCCACGTGAGGGTTCAAGACTTGATCGGACGTCTCACGTTGCAGGAGAAGATCCGCCTCCTCGTCAACAATGCCGCCGCTGTGCCACGCCTCGGTATTGGAGGCTATGAGTGGTGGTCCGAGGCTCTCCACGGCGTTTCCAACGTCGGTCCCGGAGCTAAGTTCGGTGGTGCTTTTCCCGGTGCAACCAGCTTCCCTCAGGTCATCACCACCGCAGCTTCTTTCAACCAGTCTCTA…
>Thlarv_Thlar.0158s0152.1
ATGGCTTGTGATAATAAAGCATTATTATTCGGTAACAAAGTCGTGGTTACACTTTTATTCCTCTTATGTTTGGTTCACTCGTCAGAGTCATTTCGGCCACTGTTTGCATGCGACCCTGCAAATGGGTTAACCCGGACGCTCCGATTCTGCCGGGTCAATGTACCGATCCACGTGAGGGTTCAAGACATGATCGGACGGCTCACCTTGCAGGAGAAAATCCGCCTTCTCGTCAACAATGCTGCCGCCGTGCCACGCCTTGGTATTGGAGGCTATGAGTGGTGGTCGGAGGCTCTACACGGAGTTTCTGACGTCGGTCCCGGCGCCAAGTTCGGAGGTGCTTTTCCCGGTGCCACCAGTTTCCCTCAGGTCATCACCACCGCAGCTTCTTTCAACGAGTCT…

## Sheet: Pme58
Back to index
>Arahal_Araha.16265s0002.1
ATGGGGGTTGATAGTGAATTGAAAAAGAAGAGATGCATCATTGCTGGGGTTATCACGGCCTTGCTCGTTATCATGGTTGTTGCTGTCGCCATCATAACATCAAGAAACACCAGTCATAATTCAGACAAAGTCGCCCCAGTGCAGATTAAAACAACCACAAATGCAGTCGAAGCAGTTTGTGCACCTACTGATTACAAAGAGACTTGTGTCAACAGTCTAATGAAAGCTTCTCCTGACTCCACTCAGCCTCTTGACCTCATTAAACTTGGCTTCAACGTCACTATTCGCTCCATTAAAGATAGCATCAAGAAAGCCTCCGCGGAGCTGAAAGCCAAGGCAGCCAACGATAACGAGACCAAAGGGGCTTTGGAGTTGTGTGAGAAGCTTATGAATGATGCT…
>Aralyr_AL8G22720.t1
ATGGGGGTTGATAGTGAATTGAAAAAGAAGAAATGCATCATTGCTGGGGTTATCACGGCCTTGCTCGTTATCATGGTTGTCGCTGTCGCCATCATAACATCAAGAAACACAAGTCATAATTCAGACAAAATCGCCCCAGTGCAGATTAAAACAACCACAAATGCAGTCGAAGCAGTTTGTGCACCTACTGATTACAAAGAGACTTGTGTCAACAGTCTAATGAAAGCTTCTCCTGACTCCACTCAGCCTCTTGACCTCATAAAGCTTGGCTTCAACGTCACTATTCGCTCCATTAAAGATGGCATCAAGAAAGCTTCCGCTGAGCTAAAAGCCAAGGCAGCCAACGATAACGAGACCAAAGGGGCTTTGGAGTTGTGTGAGAAGCTTATGAATGATGCT…
>ArathaCOL_AT5G49180.1
ATGGGGGTTGATGGTGAACTGAAAAAGAAGAAATGCATCATTGCTGGGGTTATCACAGCCTTGCTCGTTCTCATGGTTGTCGCTGTTGGCATCACAACATCAAGAAACACCAGTCATTCAGAAAAAATCGTCCCTGTGCAGATTAAAACAGCCACCACGGCAGTTGAAGCAGTTTGTGCACCTACTGATTACAAAGAGACTTGTGTCAATAGTCTCATGAAAGCTTCTCCTGACTCTACTCAGCCTCTTGATCTCATTAAGCTTGGCTTCAACGTCACCATTCGATCCATAGAAGATAGCATCAAGAAAGCTTCCGTGGAGCTGACAGCCAAGGCAGCTAATGACAAGGATACCAAAGGGGCTTTGGAGTTGTGTGAGAAGCTTATGAATGATGCTACA…
>Braole_Parent=BolC2t11784H;Name=BolC2t11784H
ATGGGCTTCGGTAAAGATAACAAAAAGAAGAAATGCATCGTCGCTGGGGTTGTCACGGGTTTGCTCGTTATCATGGTAGTCTCCGTGGCCGTCATAGCGAACCAACATGCCCATTCTTGTAAGAAAAAGCCCGACGTGAATATTAAAATGACCAGCAAGGCAGTCGAAGCGGTGTGCGCACCTACTGACTTCAAGGAAACATGTGTCAACAGCTTCATGAAAGCGTCTCCTAACTCCACCGAGCCTCTTGATCTCATCAAGCTCAGCTTCAACATCACCATTCAAGCCATCAAGGATGGTGTCAAGAAATCCTCTGTAGAGCTCAAAGCCAAGGCAGATCATGAGACCAAAGGGTCTCTGGAGTTGTGTGAGACGCTTATGAATGACGCTATAGATGAT…
>Brajun_BjuA008372
ATGGGCTTCGGTAAAGATAACAAAAAGAAGAAATGCATTGTCGCTGGGGCTGTCACGGGTTTGCTCGTTATCATGGTAGTCGCCGTGGCCGTCATAGCGAACCAACATGCCCATGCTTGTAAGAAAATACCCGACGTGAATATTAAAATGACCAGCAAGGCAGTCGAAGCGGTGTGCGCACCTACTGACTTCAAGGAAACATGTGTCAACAGCTTCATGAAAGCTTCTCCTAACTCCACCGAGCCTCTTGATCTCATCAAGCTCAGCTTCAACATCACCATTCAAGCCATCAAGGATGGTGTCAAGAAATCCTCTGTAGAGCTCAAAGCCAAGGCAGATCATGAGACCAAAGGGTCTCTGGAGTTGTGTGAGACGCTTATGAATGACGCTATAGATGAT…
>Brajun_BjuB042938
ATGGGCTTCGACGGGGCAAACAAAAAGAAGAAATGCATCGTCGCTGGGGTTGTCACGGCTTTGGTCGTTGTCATGGTAGTCACCGTGGCCGTCATAGCGAACCAACATACCGATTCTCGTCACAAAAAAACCGACGTGGATATTAAAATGACCAGCAAGGCAGTCCAAGCGGTGTGTGCACCTACTGACTTCAAAGACACGTGTGTCAACAGCTTCATGAAAGCTTCTCCTAACTCCACCGAGCCTCTTGATCTCATCAAGCTAAGCTTCAACATCACTATTCAATCCATCAAGGATGGTATCAATAAATCCTCCGTAGAGCTCAAAGCCAAGGCAGATCACGAGACCAAAGGGTCTCTAGAGTTGTGTGAGACGCTTATGAATGAAGCTATAGATGAA…
>Brajun_BjuB042940
ATGGGCTTCGACAGGGGAAACAAAAAGAAGAAATGCATCGTCGCTGGGGTTGTCACGGCTTTGCTCGTTGTCATGGTAGTCACCGTGGCCGTCATAGCGAACCAACATGCCCATTCTTGTCACAAAAAACCCGACGTGAATATTAAAATGACCAGCAAGGCAGTCCAAGCGGTGTGTGCACCTACTGACTTCAAAGACACATGTGTCAACAGCTTCATGAAAGCTTCTCCTAACTCCACCGAGCCTCTTGATCTCATCAAGCTAAGCTTCAACATCACTATTCAATCCATCAAGGATGGTATCAAAAAATCCTCAGTAGAGCTAAAAGCCAAGGCAGATCACGAGACCAAAGGGTCTCTAGAGTTGTGTGAGACGCTTATGAATGAAGCTATAGATGAA…
>Brarap_Parent=BraA02t08776Z;Name=BraA02t08776Z
ATGGGCTTCGGTAAAGATAACAAAAAGAAGAAATGCATTGTCGCTGGGGCTGTCACGGGTTTGCTCGTTATCATGGTAGTCGCCGTGGCCGTCATAGCGAACCAACATGCCCATGCTTGTAAGAAAATACCCGACGTGAATATTAAAATGACCAGCAAGGCAGTCGAAGCGGTGTGCGCACCTACTGACTTCAAGGAAACATGTGTCAACAGCTTCATGAAAGCTTCTCCTAACTCCACCGAGCCTCTTGATCTCATCAAGCTCAGCTTCAACATCACCATTCAAGCCATCAAGGATGGTGTCAAGAAATCCTCTGTAGAGCTCAAAGCCAAGGCAGATCATGAGACCAAAGGGTCTCTGGAGTTGTGTGAGACGCTTATGAATGACGCTATAGATGAT…
>Branap_BnaCnng75130D
AACTCTTTGAAAAATCTAACCAATGCTAACGCTCTAACATTTTGGGTAACAGAAGCAACGGGAGATCTTGGAAACAACGCCAGAAAGCTTTTGTATGCTGAAGACGGTTTCCCAAGCTGGGTAGGACCAGACACTCGAAGGCTCATGGCAGCACCACAAGGAGGTGTGAAACCTAATGTGGTGGTGGCTAAGGACGGAAGTGGTCAGTACAAAAGTATAAACGAGGCCTTGAAGGCTGTGCCTATAAACAACAAAGTGCCATTCGTTATCTACATCAAGCAAGGTGTCTACAAGGAGAAAGTCGTTGTTACAAAACAGATGTATCACGTCACTTTCATCGGAGATGGACCCACCAAAACTAAGATCACCGGTAGTGTCAACTTTGGTATCGGCAAGGTC…
>Branap_BnaA02g30620D
ATGGGCTTCGGTAAAGATAACAAAAAGAAGAAATGCATTGTCGCTGGGGCTGTCACGGGTTTGCTCGTTATCATGGTAGTCGCCGTGGCCGTCATAGCGAACCAACATGCCCATGCTTGTAAGAAAATGCCCGACGTGAATATTAAAATGACCAACAAGGCAGTCGAAGCGGTGTGCGCACCTACTGACTTCAAGGAAACATGTGTCAACAGCTTCATGAAAGCTTCTCCTAACTCCACCGAGCCTCTTGATCTCATCAAGCTAAGCTTCAACATCACCATTCAAGCCATCAAGGATGGTGTCAAGAAATCCTCTGTAGAGCTCAAAGCCAAGGCAGATCATGAGACCAAAGGGTCTCTGGAGTTGTGTGAGACGCTTATGAATGACGCTATAGATGAT…
>Boestr_Bostr.15774s0049.1
ATGGGGGTTGATGTTGAATTTAAAAAGAAGAAATGGATCATTGCTGGGGTTATCACGGCCTTACTCGTTGTCATGGTTATAGCTGTCGCCATCATAACATCAAAAAATACCAGCGGTTCAGACAAAATCGCCCCTGTGCAGATTAAAGCAACCACCAAGGCAGTCCAAGCAGTTTGTGCACCTACTAATTACAAAGAGACTTGTGTCAATAGTCTCATGAAAGCTTCTCCTGACTCCACTCAGCCTCTTGAACTCATTAAGCTTGGCTTCAACATCACCATTCAATCCATAAAATATAGCATCAAGAAAGCTTCCGGGGAGCTGAAAGCCAAGGCAGCCAAAGACAACGAGACCAAAGGGGCTTTGGAGTTGTGTGAGAAACTTATGACTGATGCTACA…
>Capbur_MPGU01000043.1_FGenesh519.1
ATGGGGATCGATGGTGAATTGAAAAAGAAGAAATGCATCATTGCTGGGATTATCACGGCTTTGCTCGTTGTCATGGTTATCGCTGTCGCCATCATAATGTCAAGAAATACCATCGGTTCAGAGACAATCGCTGGGGTGCAGATCAAAACAACCACCAAGGCAGTTCAAGAAGTTTGTGCACCTACTGATTACAAAGAGACTTGTGTCAACAGTCTCATGAAAGCTTCTCCTGACTCCACTCAGCCTCTTGAACTCATTAAGCTTGGCTTCAACATCACCATTCAATCCATTAAAGATAGCATCAAGAAAGCTTCCGAGGAGCTGAAAGCCAAGGCAGCCAAAGACAATGAGACCAAAGATGCTTTGGAGTTGTGTGAGAGTCTTATGACTGATGCTACA…
>Capbur_MPGU01000368.1_FGenesh45.1
ATGGGGATCGATGGTGAATTAAAAAAGAAGAAATGCATCATTGCTGGGATTATCACGGCCTTGCTCGTTGTCATGGTTATCGCTGTCGCCATCATAATGACAAGAAATACCACCGGTTCAGAGAAGATCGCTGCGGTGCAGATCAAAACAACCACCAAGGCAGTTCAAGAAGTTTGTGCACCTACTGATTACAAAGAGACTTGTGTCAACAGTCTCATGAAAGCTTCTCCTGACTCCACGCAGCCTCTTGAACTCATTAAGCTTGGCTTCAACATTACTATTAAATCTATTAAAGATAGCATCAAGAAAGCTTCCGAGGAGCTAAAAGCCAAGGCAGCCAAAGACAACGAGACCAGAGATGCTTTGGAGTTGTGTGAGAATCTTATGACTGATGCTACA…
>Carhir_CARHR182480.1
ATGGGGTTTGAAAATGAAAAGAAAAAGAAGAAATACATCATTGCTGGGATCATCACAGCATTGCTTGTTGTCATGGTGGTCGCTGTCGCAATCATAACAACGAAATATGGCAGCGGTTCAAAGATAATCGCGGACGTTCAGATTAAAACAACCTCCAAGGCAGTTCAAGCAGTTTGTGCACCTACTGATTTCAAAGAGACGTGTGTTAAAAGTCTCACGAATGCTTCTCCTAACTCAACTCAACCTCTTGACCTCGTTAAGCTTGGCTTTGATATCACTATTCGCTCCATCAAAGATAGCATCAAGAAAGCTTCGAAGGAGTTGAAAGCCAAGGCAGCCAAAGACAAGGAGACAGAAGGAGCTTTGGAGTTATGTGAGAAACTTATGAATGATGCTACG…
>Capgra_Cagra.3134s0016.1
ATGGGGATCGATGGTGAATTGAAAAAGAAGAAATGCATCATTGCTGGGATTATCACGGCTTTGCTCGTTGTCATGGTTATCGCTGTCGCCATCATAATGTCAAGAAATACCATCGGTTCAGAGACAATCGCTGGGGTGCAGATCAAAACAACCACCAAGGCAGTTCAAGAAGTTTGTGCACCTACTGATTACAAAGAGACTTGTGTCAACAGTCTCATGAAAGCTTCTCCTGACTCCACTCAGCCTCTTGAACTCATTAAGCTTGGCTTCAACATCACCATTCAATCCATTAAAGATAGCATCAAGAAAGCTTCCGAGGAGCTGAAAGCCAAGGCAGCCAAAGACAACGAGACCAAAGATGCTTTGGAGTTGTGTGAGAGTCTTATGACTGATGCTACA…
>Capcru_Carub.0008s0900.1
ATGGGGATCGATGGTGAATTGAAAAAGAAGAAATGCATCATTGCTGGGATTATCACGGCTTTGCTCGTTGTCATGGTTATCGCTGTCGCCATCATAATGTCAAGAAATACCATCGGTTCAGAGACAATCGCTGGGGTGCAGATCAAAACAACCACCAAGGCAGTTCAAGAAGTTTGTGCACCTACTGATTACAAAGAGACTTGTGTCAACAGTCTCATGAAAGCTTCTCCTGACTCCACTCAGCCTCTTGAACTCATTAAGCTTGGCTTCAACATCACCATTCAATCCATTAAAGATAGCATCAAGAAAGCTTCCGAGGAGCTGAAAGCCAAGGCAGCCAAAGACAATGAGACCAAAGATGCTTTGGAGTTGTGTGAGAGTCTTATGACTGATGCTACA…
>Camsat_Csa02g035270.1
ATGGGGCTGGAAGGTGAATTGATAAAGAAGAAAAGCATCATTGCTGGGATTCTCACGGCCTTACTCGTTGTCATGGTTATCGTTGTCGCCATCATAAAAACACAAAATACCAGCCATCCAGACAAAATCACCACTGTGCATATTCAAGCAACCACCAAGGCAATCCGAGCAGTTTGCGCACCAACTGATTACAAAGAGACTTGTGTCGACAGTCTCATGCATGCTTCTCCTGACTCCACTCAGCCTCTTGAACTCATTAAGCTTGGCTTCAACATCACCATCCAATCCATAAAAGATAGCGTCAAGAAAGCTTCCGGGGAGCTGAAAGCCAAGGCAGCCAATGACAACGAGACCAAAGGGGCTTTGGACTTGTATAGCGTCAAGAAAGCTTCCGGGGAG…
>Camsat_Csa11g078460.1
ATGCTCTACCCCAATAATAGCACTTTGCATCTGCATTATATTATTAACTCCACTCTTCTCTTCTCCTTCCTTCTAACCAAAACAGAGTCACAACAGGGCTCTAAGCAACAGTTAGAAGCCCCTCCAACTAAATTCTTTTCTTTACGTTCTCTTGAAATTGAATCCACCAAACAAAAAAAAATGGGGCTGGAAGGTGAATTGATAAAGAAGAAAAGCATCATTGCTGGGATTCTCACGGCCTTACTCGTTGTCATGGTTATCGTTGTCGCCATCATAAAAACACAAAATACCAGCAATCCAGACAAAATCACCACTGTGCAGATTAAAGCAACCACCAAGGCAATCCGAGCAGTTTGCGCACCAACTGATTACAAAGAGACTTGTGTCAACAGTCTCATG…
>Camsat_Csa18g018530.1
ATGGGGCTGGAAGGTGAATTGATAAAGAAGAAAAGCATCATTGCTGGGATTCTCACGGCCTTACTCGTTGCCATGGTTATCGTTGTCGCCATCATAAAAACACAAAATTCCAGCAATCCAGACAAAACCACCACTGTGCATATTACAGCAACCACCAAGGCAATCCGAGCAGTTTGCGCACCAACTGATTACAAAGAGACTTGTGTCAACAGTCTCATGAAAGCTTCTCCTGACTCCACTCAGCCTCTTGAACTCATTAAGCTTGGCTTCAACATCACCATCCAATCCATAAAAGATAGCGTCAAGAAAGCTTCCGGGGAGCTGAAAGCCAAGGCAGCCAATGACAACGAGACCAAAGGGGCTTTGGACTTGTGTGAGAAACTTATGACTGATGCTACA…
>Dipstr_Distr.0031s0009.1
ATGGGTTTTGACTGTGAAAACAAAAAGAAGAAATGCATCATTGCTGGGGTCATCTCGTCCTTGTTAGTTATCATGGTTGTCTCAGTCGCCATCATAACGTCCAAACATATGAACGATTCGAACGCGCAACTTAAAACGACCAAAAAAGCAGTCCAAGAGGTATGTGCACCAACTGACTTCCCAGAGACCTGCATTAACGGCTTCATGGAGTCCTCTCCTAACTCCACTCAGCCTCTCGACCTCATTAAGCTCAACTTTGATATCACCATTCGTTCCATCAAAGACGGCATCAAGAAAGCCTCGAGCGAGCTTAAAGACAAGGCAGCCCAAGACCACGAGACCAAGGGGGCTCTAGAGTTGTGCGAAAAGCTTATGACTGACGCCATCGATGATTTGAAA…
>Eutesa_Thhalv10003919m
ATGGGGTTTGGTGGTGACAACAAAAAGAAGAAAGGCATCATCGCCGGGGCTATCTCGGCTTTGCTCGTTGTCATGGTTGTCTCTGTGGCCGTCATAGTATCAAAAGATTGCAAGGCTTCAGACAAAATTAAAACGACAACAAAGGCAGTCCAAGCGGTCTGTTCACCCACTGACTTCAAAGACACATGTGTAAACAGCCTCATGGAAGCTTCTCCTAACTCTACTGAGCCTCTAGATCTCATCAAGCTCAGCTTCGACGTCACCATTCGATCCATCAAAGATGGCATCAAGAGATCCTCCACAGAGCTGAAAGCCAAGGCAGCCAAAGACGAAGAGACCAAGGGAGCTCTAGAGTTGTGTGAGAATCTTATGAATGACGCTACGGACGATCTGAAGAAG…
>Eruves_Eruve.0069s0064.1
ATGGGCTTCCATAGTGAAAACAAAAAGAAGAAATGCATCATCGCTGGGGTTATCTCGGGTTTGCTCGTTATCATGGTAGTCTCTGTGGCCGTCATAACGAACCGACAGGCGTCCCGTGATTGTACGAAAGAAGCCGACGTGAATATTAAGATGACCAGCAAGGCAGTCCAAGCGATTTGTGAACCTACTGACTTCAAAGACACATGTGTCACCAGCTTCATGAAAGCTTCTCCTAACTCCACAGAGCCTCTTGATCTCATCAAGCTCAGCCTCCACATCACCATTCAATCCATCAAGGATGGCATCAAGAAATCCTCCCACGAGCTCAAAGCCAAGGCTGATAAGGACACCAAAGAGTCTCTGGAGTTGTGTGAGACGCTTATGAATGATGCTACCGAT…
>Isatin_Isati.8957s0001.1
ATGGGGTTTGGTGGTGAAAACAAAAAGAAGAAATGCATCATTGCTGGGGTTTTCGCGGGTTTGCTCGTTATCATGGTTGTCTCTGTCGCCTTCATAGCGTCCAAAAATGCCAATGCTTCAAAGAAAACCGCCGACGTTAAGACTGAAACAACCGCCAAGGCAGTCCAAGCTGTTTGTGCACCCACTGACTTCAAAAACACATGTGTCAACAGCCTCATGGAAGCTCATCCGACCTCCACCGAGCCTCTCGATCTCATCAAGCTCAGCTTCAACATCACCATTAAATCCATCAAGGATGGCATCAAGAAAGCTTCCGGGGAGCTGAAAGCCAAGGCAGAGGAGCATGAGACCAAAGGGGCTATAGAGTTATGTGAGACAGTTATGAATGACGCTACAGAC…
>Isatin_Isati.1482s0002.1
ATGGGGTTTGGTGGTGAAAACAAAAAGAAGAAATGCATCATTGCTGGGGTTTTCGCGGGTTTGCTCGTTATCATGGTTGTCTCTGTCGCCGTCATAACGACCAAAAATGCCAACGCTTCAAAGAAAACCGCCGACGTTAAGACTGAAACAACCGCCAAGGCAGTCCAAGCTGTTTGTGCACCCACTGACTTCAAAAACACATGTGTCAACAGCCTCATGGAAGCTCATCCGACCTCCACCGAGCCTCTCGATCTCATCAAGCTCAGCTTCAACATCACCATTCAATCCATCAAGGATGGCATCAAGAAAGCTTCCGTGGTGCTGAAAGCCAAGGCAGAAGACCATGAGACCAAAGGGGCTATAGAGTTATGTGAGACAGTTATGAATGACGCTACAGAT…
>Isatin_Isati.0444s0035.1
ATGGGGTTTGGTGGTGAAAACAAAAAGAAGAAATGCATAATTGCTGGGGTTTTCGCGGGTTTGCTCGTTATCATGGTTGTCTCTGTCGCCTTCATAGCGTCCAAAAATGCCAATGCTTCAAAGAAAACCGCCGACGTTAAGACTGAAACAACCGCCAAGGCAGTCCAAGCTGTTTGTGCACCCACTGACTTCAAAAACACATGTGTCAACAGCCTCATGGAAGCTCATCCGACCTCCACCGAGCCTCTCGATCTCATCAAGCTCAGCTTCAACATCACCATTCAATCCATCAAGGATGGCATCAAGAAAGCTTCCGGGGAGCTGAAAGCCAAGGCAGAGGAGCATGAGACCAAAGGGGCTATAGAGTTATGTGATACAGTTATGAATGACGCTACAGAC…
>Lunann_Luann.0194s0003.1
ATGGGGTTTAATGGTGAAAACAAAAAGAAGACATGCATTATCACTGGGATTATCACGACCTTGCTCGTTGTCATGGTTGTCTCTGTAGCCATCATAACATCCAAAAATGTCAAAGTTTCAGACAAAATCGCCGACTTGCAGATTAAAACGACGACCAAGGCAGTCCAAGCGGTCTGTGCACCCACTGACTTCAAAGACACATGTGTTAACAGTCTCATGAAGGCTTCTCCCAACTCCACTCAGCCTCTCGATCTAATGAAACTCGGCTTCGACATTACCATTCGCTCCATCAAAGATGGCATCAAGAAAGCATCCGAGGAGCTGAAAGCCAAAGCAGCCAAAGACCAAGAGACCAAAGGGGCTCTTGAGCTCTGTGAGAAGCTTATGAATGACGCTACA…
>Leaala_KE159316.1_FGenesh6.1
ATGGGGTTTGAAAGTGAAAAGAAGAAGAGGAAATACATCATTGCTGGGATTATCCTGGCCTTGCTTGTTGTCATGGCTGCTGTGGTCGCCATCATAACAGCAAGAAATTGCAACAGTTCAAAGGTACTAGCCCACTTACAGATTAAAACAACCAACAAGGCAGTCCAAGCAGTTTGTGCACCTACTGATTTTAAAGAGACATGTATCACCAGTTTCATGAAAGCTTCTCCTAACTCCACTCAACCTCTTGATCTCGTTAAGCTTAGCTTTGATATCACCATTCGCTCCATTAAAGATAGTATCAAGAAAGCTTCCAAAGAGTTGAGAACCAAGGCTGCCAAAGACAAGGAGACCAAAGGAGCTTTGGAGTTGTGTGAGAACCTTATGAATGATGCTACA…
>Lepsat_Lesat.0152s0003.1
ATGGAGTTAACAAAGAAGAAATGCATCATTGCTGGGATTATCACATCTTTGCTCGTAGTCATGGTTGTCTTTGCCGCCATGATAACATGGAGTATCGATATAAATGAAATCGACGATGTGCAGATTAAGACAACAATCAAGCCAATCCAAGCAGTTTGTGCAGCCACAAATTTCCAAGACACATGTGTCAACAGTCTCATGAAAGCTTCTCCTCACTCTACTCAGCCTCAAGATCTCATCAAGCTTAGCTTCAACATCACCATTCGTGCCATTGAAGATGGCATCAAGAAGTCTTCCACGGAGCTGAATGCAGAGGACAAGGAGAGCAAAGAGGCTTTAGAGTTGTGTGAGATGCTTATGAATGATGCTGCAGAGGATCTAAAGAAGTGTTTTGATCAC…
>Rorisl_Roisl.0198s0019.1
ATGGGGTTTGATAATGGAAACAAAAAGAAGAAATACATTATTGCTGGGATTATCACAGCCTTGCTTGTTGTCATGGTTGTTGCGGTCGCCATCATCACATCGAAAAATGGCAGCAGTTCAAAGGTATTAGCCGACGTGCAGATTAAAACAACCACTAAGGCAGTTCAAGCTGTTTGTGCACCAACTGATTTCAAAGAGACATGTGTTAACAGTCTCATGAAAGCTTCTCCTAACTCCACTGAACCTCTTGATCTCGTTAAGCTTGGCTTTGATATCACCATTCGCTCAATCAAACATAGTATCAAGAAAGCTTCCAAGGAGTTGAAAGCTAAGGCAGACAAGGACAAGGAAACCAAAGGGGCTTTGGAGTTGTGTGAGAAACTTATGAATGATGCTACA…
>Rapsat_Rsa1.0_05384.1_g00001.1
ATGGGCTTCGATAAAGGAAACAAGAAGAAGAAATGCATCATCGCTGGGGTTATCACGGCTTTGCTCGTTATCATGGTAGTCTCCGTGGCCGTCATAACGAACCAACATGCCCGTACTTGTAATCACAAAAAAGCCGACGCGAATATTAAAATGACCAGCAAGGCAGTCGAGGCGGTTTGTGCACCTACTGACTTCAAAGAAACATGTGTCAACAGCTTCATGAAAGCTTCTCCTAACGCCACCGAGCCTCTCGATCTCATCAAGCTGAGCTTCAACATCACCATTCAATCCATCAAGGATGGTATCAAGAAATCCTCTGTAGAGCTCAAAGCCAAGGCAGATGATGAGACCAAAGGGTCTCTGGAGTTGTGTGAGACGGTTATGAATGACGCTATAGAT…
>Sinalb_Sialb.1006s0013.1
ATGGGATTCGATAAGGAAAACAAAAAGAAGAAATGCATCATCGCTGGGGTTGTCTCCGCTTTGCTCGTTATCATGGTAGTCTCTGTGGCCGTCATAGCGAACCAACATGCCCATGCTTGTAAGAAAAATCCCGACGTGAATATTAAAATGACCAGCAAGGCAGTCCAAGCGGTGTGTGCACCTACTGACTTCAAAGACACATGTGTCAACAGCTTCATGAAAGCTTCTCCTAACTCCACCGAGCCTCTTGATCTCATCAAGCTAAGCTTCAACATCACTATTCAATCCATCAAGGATGGTATCAAGAAATCCTCTATAGAGCTCAAAGACAAGGCAGATGATGAGACCAAAGGGTCTCTAGAGTTGTGTGAGACGGTTATGAATGATGCTATAGATGAT…
>Sinalb_Sialb.1006s0012.1
ATGGGATTCGATAAGGAAAACAAAAAGAAGAAATGCATCATCGCTGGGGTTGTCTCGGCTTTGCTCGTTGTCATGGTTGTCTCTGTGGCCGTCATAGCGAACCGAAATGCCCATGCTTGTAAGAAAAATCCCGACGTGAATATTAAAATGACCAGCAAGGCAGTCCAAGCGGTTTGTGCACCTACTGAATTCAAAGACACATGTGTCAACAGCTTCATGAAAGCTTCTCCTAACTCCACCGAGCCTCTTGATCTCATCAAGCTAAGCTTCAACATCACTATTCAATCCATCAAGGATGGTATCAAGAAATCCTCTGTAGAGCTCAAAGACAAGGCAGATCATGATACCAAAGTGTCTCTAGAGTTGTGTGAGACGGTTATGAATGATGCTATAGATGAT…
>Sinalb_Sialb.1006s0011.1
ATGGGCTTCGATAAGGAAAACAAAAAGAAGAAATGCATCATCGCTGGGGTTGTCTCGGGTTTGCTCGTTATCATGGTAGTCTCTGTGGCCGTCATAGCGAACCAACGTGCCAATGCTTATAAGAAAAATCCCGACGTGAATATTAAAATGACCAGCAAGGCAGTCCAAGCGGTGTGTGCACCTACTGACTTCAAAGACACATGTGTCAACAGCTTCATGAAAGCTTCTCCTAACTCCACCGAGCCTCTTGATCTCATCAAGCTAAGCTTCAACATCACTATTCAATCCATCAAGGATGGTATCAAGAAATCCTCTGTAGAGCTCAAAGACAAGGCAGATCATGATACCAAAGTGTCTCTAGAGTTGTGTGAGACGGTTATGAATGATGCTATAGATGAT…
>Schpar_CM001188.1_FGenesh2167.1
ATGAGCTTCGATGGAGAATGCAAAAAGAAGAAATGCATCATTGCTGGGGTTATGTCGGCTTTGCTCGTTGTCATGGTAGTCTCTGTGGGCATCATAATGTCCAAAAATGGCGATGCTTCAGAAAAAGTCGCCGACGTGAATATTAAAACGACCACGAAGGCAGTCCAAGCGGTCTGTGCACCCACTGACTTCAAAGACACATGTGTCAACAGCCTCATGAAAGCTTCTCCTAACTCCACCGAGCCATTTGATCTCATCAAGCTCGGCTTCGACATCACCATTAAATCCATCAAAGATGGCATCAAGAAAGCTTCGGGGGAGCTGAAAGCCAAGGCAGCCAAAGACCATGAGACCAAAGGGGCTTTAGAGTTATGTGAGAAGCTTATGAATGACGCTACA…
>ArathaSHA_ATSHA-5G72330.1
ATGGGGGTTGATGGTGAACTGAAAAAGAAGAAATGCATCATTGCTGGGGTTATCACAGCCTTGCTCGTTCTCATGGTTGTCGCTGTTGGCATCACAACATCAAGAAACACCAGTCATTCAGAAAAAATCGTCCCTGTGCAGATTAAAACAGCCACCACGGCAGTTGAAGCAGTTTGTGCACCTACTGATTACAAAGAGACTTGTGTCAATAGTCTCATGAAAGCTTCTCCTGACTCTACTCAGCCTCTTGATCTCATTAAGCTTGGCTTCAACGTCACCATTCGATCCATAGAAGATAGCATCAAGAAAGCTTCCGTGGAGCTGACAGCCAAGGCAGCTAATGACAAGGATACCAAAGGGGCTTTGGAGTTGTGTGAGAAGCTTATGAATGATGCTACA…
>Sisiri_KE155957.1_FGenesh186.1
ATGGGGTTTGATGGTGGAAACAAAAAGAAGAAATGTATCATTGCTGGGGTCTTGTCGGGTTTGCTCGTTATCATGGTTGTCTCTGTCGCCGTCATAACGTCCAAAAAAGTCAATGCTTCAGAGAAAACCGCCGACGTTCAGATTAAAACAACCACCAAGGCAGTCCAGTCTGTTTGTGCACCCACTGATTACAAAGGAACATGCGTCAACAGCTTCATGGAAGCTTCTCCTAACTCCACCGAGCCTCTCGATCTCATCAAGCTCGGCTTGGACATCACCATTCAGTCCATCAAAGGTGGCATCAAGAAAGCCTCTGGAGAGCTCAAAGCCAAGGCAGACCATGACACCAAAGGGGCTTTGGAGTTATGTGAGAATCTTATGAATGACGCTATAGACGAT…
>Stapin_Stapi.2357s0002.1
ATGTTAACATGCATACTATATTTTGTAGCGATCAACGGTGATCACTTCACGGCCAAGAACATTGGGTTTGAGAACACCGCCGGTCCCGAAGGACATCAAGCTGTGGCCCTGAGAGTCTCCGCGGACTATGCCGCTATCTTTAACTGTCAAATCGATGGTTACCAAGACACACTCTACGCCCATTCCCATCGCCAGTTCTACCGTGACTGCACGATCTCCGGCACCGTCGACTTCATCTTCGGCGACGCAAAATCCGTCTTTCAAAACTGCATTATCGTGGTGAGAAAGCCCATGGGAGGCCAATCTTGCCTGGTCACTGCTCAAGGCCGTACCGACAAGCGTGAATCCACCGGAATCGTGCTCCACAACTGCCGAATCACCGGAGAACTGGCGTACATT…
>Stapin_Stapi.0341s0006.1
ATGGGGTTTGATGGTGGAAACAAAAAGAAGAAATGCATCATTGCTGTGGTCTTTTCGGCTTTGCTCGTTGTCATGGTTGTCTCTGTCGCCGTCATAACGTCCAAAAATGTTTCTTCAGAGAAAACCGCCGACATTAAGATTAAAACAACCACCAAGGGAGTCAAATCTGTTTGTGCACCCACTGACTTCCAAGGCACATGCGTCAACAGCTTCATGGAAGCTTCTCCTAACTCCACCGAGCCTCTCGATCTCATCAAGCTCGGCTTCGACATCACCATTCAATCCATCAAGGATGGCATCAAGAAAGCCTCTGGGGAGCTCAAATCCAAGGCAGACAAAGACCATGAAACCAAAGGGGCTTTGGAGTTATGTGAGAAGCTTATGAATGACGCTATAGAC…
>Thlarv_Thlar.0158s0135.1
ATGGGGTTTGGTAGTGAAAAGAAAAAGAAGAAATGCATCATTGGTGGGGTTATCTCGGCTTTGATCGTTGTGTTGGTTGTCTCTATCGCCATCATAACGACCAAACATTACTATGCTTCAGGTAATATCGCTCACGTGAAGATTCAAACGACCAACAAGGCAGTCCAAGCGGTCTGTGCACCCACCGACTTCAAAGACACATGTGTCAAGAGCTTCATGAAGGCTTCTCCTAACTCCACTGAACCTCTCGACCTCATCAAGCTCGGCTTCGACATCACCATTCGATCCATCAAAGATGGCATCAAGAAAGCCTCCAAGGAGCTGAAAGCTAAGGCAGCCAAAGACCATGAGACCAAAGGGGCTCTAGATTTATGTGAGAAGCTTATGAATGACGCTACA…

## Sheet: Ats
Back to index
>Aetara_KE152832.1_FGenesh92.1
ATGAACAACTCTTCACTTCCACTTCGAGTTTCAGTTCCAGTTCCAGATCTATCACTTCAAATCAGCCTCCCTTCTTCTCTGAGCTCAACCACCAGCGACTCCACCAGCGGCTTGACCGAACTTAGCCATGAAAACACCTTCTTCAAACCACCTCTCTTGAGCCTAGGCTTCAATCACCATCATCAAAAACACTCAAATAACATGTATTCACCACAAATCTACGGTCGAGATTTCAAAAGAAGTTCAAGAATTGGTGTTAAAAGAAACACTAGAGCTCCAAGAATGCGTTGGACTTCTACTCTTCATGCTCATTTTGTACATGCTGTTCAACTCCTAGGCGGCCATGAAAGAGCTACTCCTAAATCAGTACTAGAGCTAATGAATGTTAAGGATTTAACC…
>Arahal_Araha.21611s0001.1
ATGAATGTGAAGGATCTAACCCTAGCTCATGTCAAGAGTCATTTGCAGATGTATAGAACAGTGAAATGTACTGATAAAGGATCATCAGGAGAAGGAAAGGTAGAGAAAGAGGCAGAGCAGAGGATAGAGGACAATAATAATAATGAAGAAGCTGATGAAGGAACTGACACAAATTCGCCAAACTCATCAACTGTGCAAAAGACCCAAAGAGCTCCATGGTCATCCACAAAGGGAGTACCTAGGAGCATATCTACACAAGCAGATCCTCATTTGGGAACAACTCAACACACTAAGGAAAACGAGGAGAAAGAGGCAACCAACATTCATCTCAATTTGGAATTCACATTGGGGCGGCCGAGTTGGGGGATGGACTATGCGGAACCCTCCAGCGATTTAACC…
>Aralyr_AL8G18620.t1
ATGATGATGTTAGATTCAAGAAACACTATGAGAGCTTTAAACTCAATCCCAGATCTGTCTCTTCAAATCAGTCTTCCTAACTCTCACGCCGGAAAACCTCTTCACGGCGGTGACCGGAGCTCCACAAGCAGTGACTCCGGAAGCAGCCTCAGTGAGTTAAGCCATGAGAACAACTTCTTCAACAAACCTCTCTTGAGCTTAGGCTTTGAACATCATCATCATCAAAGGAACTCAAACATGTTCCAACCCCAAATCTATGGCCGAGATTTCAAGAGAAGCTCATCATCAATGGTGGGTCTTAAACGAAGCATTAGAGCTCCAAGAATGAGATGGACTTCTACTCTTCATGCTCATTTCGTCCATGCTGTTCAACTTCTTGGCGGCCATGAAAGAGCAACG…
>Araalp_lcl_CM002874.1_KFK32913.1_14155
ATGGGAGGTACAAACTCATCAGTCCCAGATCTGTCTCTTCAGATCAGTCTCCCTAACTCTCACACCGGAAAATCTCTTCACGGTGGTGACTGGAGCTCCACTAGCAGTACTGACTCCGGCAGTAGCCTCAGTGAGTTGAGCCATGAGAACAACTTCTTCAACAACAAACCTCTCTTGAGCTTAGGCTTTGATCATTACCATCATCAAAGACGCTCAAACATGTTCCAACCACAAATCTATGGTCGAGATTTCAAGAGAAGCTCAACATCAATGGTTGGTCTTAAACGAAACATTCGAGCTCCAAGAATGAGATGGACTTCTACTCTCCATGCTCACTTTGTCCATGCTGTTCAACTCCTTGGTGGCCATGAAAGAGCAACACCCAAATCAGTGTTGGAG…
>ArathaCOL_AT5G42630.1
ATGATGATGTTAGAGTCAAGAAACAGTATGAGAGCTTCAAACTCAGTCCCAGATCTGTCTCTTCAGATCAGTCTTCCTAACTATCACGCCGGAAAACCTCTTCACGGCGGTGACCGGAGCTCCACAAGCAGTGATTCTGGAAGCAGCCTCAGTGACCTGAGCCATGAGAACAACTTCTTCAACAAACCTCTCTTGAGCTTAGGATTTGACCATCATCATCAAAGGCGCTCAAACATGTTCCAACCTCAAATCTACGGTCGAGATTTCAAGAGAAGCTCATCATCAATGGTTGGTCTTAAACGAAGCATTCGTGCTCCAAGAATGAGATGGACTTCTACTCTTCATGCTCACTTCGTCCATGCTGTTCAACTTCTTGGCGGCCATGAAAGAGCAACGCCT…
>Bislae_OVAU01034252.1_FGenesh1.1
ATGATGATGATGTTAGAGCCAAGGAGCAGTATGAGAGATTCAAACTCATCATCAGTCCCAGATCTTTCTCTTCACATCAGCCTTCCTAACTCCCAAGGCAGTGACATGAGCTCAACAGGCAGTGCTTCCGGCAGTAGTCTCAGTGAGTTAAGCCATGAGAACAACTTATTCAACAAACCTCTCTTGAGCTTAGGATTTAATCATCATCAGAGGAGGAGCTCAAACATGTTTCAACCTAAAATCTACAGTCAAGATTTCAAGAGAATCTCATCGTCAACACTTGGTCTTAAAAGAAGCATTCGAGCTCCAAGAATGAGATGGACTTCCACTCTACATGCTCACTTCGTTCATGCTGTTCAACTCCTTGGTGGTCATGAAAGAGCAACACCTAAATCAGTT…
>Bislae_OVAU01051618.1_FGenesh1.1
GCAACTCCAAAATCAGTTCTTGAGTTGATGAATGTGAAAGATCTAACCCTAGCTCATGTCAAGAGTCACTTGCAGATGTATAGAACAGTTAAATGCACTGATAAAGGATCACCAGGAGAAGGAAAGATAGTGAAAGAGGACAATAATAATAATAATAATGAAGAACAAGAAGATGATGAAGGCACTGACACAAATTCGCCAAACTCATCATCTCTGCAAAAGACCCAAAGAGCTTCTTGGTCATCTACAAAGAAAGGATCTCTGAACAAATCTACTCAAGTAGATCCTCACCTAGCAACAACTCATCATACTAAGGAAGATGAGGAGAAAGATATGACAAATGTTAATCTCAATTTAGAATTCACTTTGGGATGGTCAAGTTGGGGAATGGACTATGCA…
>Braole_Parent=BolC2t10394H;Name=BolC2t10394H
ATGATCATGTTCGAGTCAAGAAGCAGTGTGAGAGGTTCAAACTCAGTCCCAGATCTGTCTCTTCAGATCAGCCTTCCAAACTCTCACGCCGAGAAACCCCTTCACGGCAGTGAACGGAGCTTCACCACAAGCAGTGACTCCGGAAGCAGCCTCAGTGAGTTAAGCCATGAGAACAGCTTCTTGAAGAAACATCTCTTGAGCCTAGGCTTTGATCATCATCATCCATATCATCATCATCAGAGGCACAGCTCAAACATGTTCCAACCACAAATCTACGGACGAGATTTCAAGAGAACCTCATCTTCTGTGGTTAGTCTTAAACGAAGTATCCGAGCTCCAAGAATGAGATGGACTTCTACTCTCCATGCTCATTTCGTCCATGCTGTTCAACTTCTTGGA…
>Brajun_BjuA024482
ATGATCATGTTCGAGTCAAGAAGCAGTGTGAGAGGTTCAAACTCAGTCCCAGATCTGTCTCTTCAGATCAGCCTTCCAAACTCTCACGCCGAGAAACCCCTTCACGGCAGTGAACGGAGCTTCACCACAAGCAGTGACTCCGGAAGCAGCCTCAGTGAGTTAAGCCATGAGAACAGCTTCTTGAAGAAACATCTCTTGAGCCTAGGCTTTGATCATCATCATCCATATCATCATCATCAGAGGCACAGCTCAAACATGTTCCAACCACAAATCTACGGTCGAGATTTCAAGAGAACCTCATCTTCTGTGGTTAGTCTTAAACGAAGTATCCGAGCTCCAAGAATGAGATGGACTTCTACTCTCCATGCTCATTTCGTCCATGCTGTTCAACTTCTTGGA…
>Brajun_BjuB027727
ATGATCATGTTCGAGTCAAGAAGCAGTGTGAGAGGTTCAAACTCAGTCCCAGATCTGTCTCTTCAGATCAGCCTTCCAAACTCTCACGCCGAGGAACCCCTTCACAGCAGTAACCGGAGCTCCACCACAAGCAGTGACTCCGGAAGCAGTCTCAGTGAGTTAAGCCATGAGAACAGCTTCTTGAAGAGACATCTCTTGAGCTTAGGCTTTGATCATCATCATCCATATCATCATCAGAGGCAAAGCTCAAAAATGTTCCAACCACAAATCTACGGTCGAGATTTCAAGAGAAACTCATCTTCAGTGGTTAGTCTTAAACGAAGCATTCGAGCTCCAAGAATGAGATGGACTTCTACTCTCCATGCTCATTTCGTCCATGCTGTTCAACTTCTTGGAGGC…
>Brarap_Parent=BraA02t07758Z;Name=BraA02t07758Z
ATGATCATGTTCGAGTCAAGAAGCAGTGTGAGAGGTTCAAACTCAGTCCCAGATCTGTCTCTTCAGATCAGCCTTCCAAACTCTCACGCCGAGAAACCCCTTCACGGCAGTGAACGGAGCTTCACCACAAGCAGTGACTCCGGAAGCAGCCTCAGTGAGTTAAGCCATGAGAACAGCTTCTTGAAGAAACATCTCTTGAGCCTAGGCTTTGATCATCATCATCCATATCATCATCATCAGAGGCACAGCTCAAACATGTTCCAACCACAAATCTACGGTCGAGATTTCAAGAGAACCTCATCTTCTGTGGTTAGTCTTAAACGAAGTATCCGAGCTCCAAGAATGAGATGGACTTCTACTCTCCATGCTCATTTCGTCCATGCTGTTCAACTTCTTGGA…
>Branap_BnaC02g29570D
ATGATCATGTTCGAGTCAAGAAGCAGTGTGAGAGGTTCAAACTCAGTCCCAGATCTGTCTCTTCAGATCAGCCTTCCAAACTCTCACGCCGAGAAACCCCTTCACGGCAGTGAACGGAGCTTCACCACAAGCAGTGACTCCGGAAGCAGCCTCAGTGAGTTAAGCCATGAGAACAGCTTCTTGAAGAAACATCTCTTGAGCCTAGGCTTTGATCATCATCATCCATATCATCATCATCAGAGGCACAGCTCAAACATGTTCCAACCACAAATCTACGGACGAGATTTCAAGAGAACCTCATCTTCTGTGGTTAGTCTTAAACGAAGTATCCGAGCTCCAAGAATGAGATGGACTTCTACTCTCCATGCTCATTTCGTCCATGCTGTTCAACTTCTTGGA…
>Branap_BnaA02g36680D
CGAGATTTCAAGAGAACCTCATCTTCTGTGGTTAGTCTTAAACGAAGTATCCGAGCTCCAAGAATGAGATGGACTTCTACTCTCCATGCTCATTTCGTCCATGCTGTTCAACTTCTTGGAGGCCATGAAAGAGCAACGCCTAAATCAGTCTTGGAGCTGATGAATGTGAAGGATCTAACCCTAGCTCATGTCAAGAGTCACTTGCAGATGTATAGAACAGTGAAATGCACTGATAAAAGATCATCAGGAGAAAGAAAGGTGGAGAAAGAGGCAGAGCAGAAGACAGAGGACAATAATAATAATAATGAAGACGCTGATGCTGACCCAATTTCGCCAAACTCATCATCTGTGCAAAAGACCCAAAGATCTCCTTGGTCTTCCACTAAGGGAGTGTCTATG…
>Branap_BnaA02g23100D
ATGATCATGTTCGAGTCAAGAAGCAGTGTGAGAGGTTCAAACTCAGTCCCAGATCTGTCTCTTCAGATCAGCCTTCCAAACTCTCACGCCGAGAAACCCCTTCACGGCAGTGAACGGAGCTTCACCACAAGCAGTGACTCCGGAAGCAGCCTCAGTGAGTTAAGCCATGAGAACAGCTTCTTGAAGAAACATCTCTTGAGCCTAGGCTTTGATCATCATCATCCATATCATCATCATCAGAGGCACAGCTCAAACATGTTCCAACCACAAATCTACGGACGAGATTTCAAGAGAACCTCATCTTCTGTGGTTAGTCTTAAACGAAGTATCCGAGCTCCAAGAATGAGATGGACTTCTACTCTCCATGCTCATTTCGTCCATGCTGTTCAACTTCTTGGA…
>Boestr_Bostr.3148s0235.1
ATGATGATGTTAGAGTCAAGAAACAGTATGAGAACTTCAAACTCAGTCCCAGATCTGTCCCTTCAGATCAGCCTTCCTTACTCTCACGCTGAAAAACCTCTTCACGGCGGTGACCGGAGCTCCACCAGTAGTGACTCCGGAAGCAGCCTCAGTGAGCTGAGCCATGAGAACAACTTCTTCAACAAACCTCTCTTGAGATTAGGCTTCGATCATCATCATCATCATCAAAGGCACTCAAACATGTTCCAACCCCAAATCTACGGCCGAGATTTCAAGAGGAGCTCATCATCAATGGTGGGTCTTAAACGAAGCATTCGAGCTCCAAGAATGAGATGGACTTCCACTCTCCATGCTCACTTCGTCCATGCTGTTCAACTTCTTGGTGGCCATGAAAGAGCA…
>Capbur_MPGU01000285.1_FGenesh213.1
ATGATGATGTTAGAGTCAAGAAACAGTATGAGAGCTTCAAACACACTCCCAGATCTGTCTCTTCAGATCAGCCTTCCTAACTCTCAACCCATGAAACCTCTTAATGGTGGTGACCGGAGCTCCACAAGTAGTGACTCAGGAAGCAGCCTAAGTGAGCTAAGCCATGAGAACAGCTTCTTGATCAACAAACCTCTCTTGAGCTTAGGCTTTGATCATCATCATCATCATCAGCATCAACAAAGGCACTCAAACATGTTCCAACCACAAATCTATGGCCGAGATTTCAAGAGAAGCTCATCATCAATGGTTGGTCTTAAACGAAGCATTCGAGCTCCAAGAATGAGATGGACTTCTACTCTTCATGCTCACTTTGTTCATGCTGTTCAACTTCTTGGCGGC…
>Capbur_MPGU01000288.1_FGenesh99.1
ATGATGATGTTAGAGTCAAGAAACAGTATGAGAGCTTCAAACACACTCCCAGATCTGTCTCTTCAGATCAGCCTTCCTAACTCTCAAGCCATGAAACCTCTTAACGGAGGTGACCGGAGCTCCACAAGTAGTGACTCAGGAAGCAGCTTAAGTGAGCTAAGCCATGAGAACAGCTTCTTGATAAAAAAACCTCTCTTGAGCTTAGGCTTTGATCATCATCATCATCATCATCAACAAAGGCACTCAAACATGTTCCAACCACAAATCTATGGCCGAGATTTCAAGAGAAGTTCATCATCAATGGTTGGTCTTAAACGAAGCATTCGAGCTCCAAGAATGAGATGGACTTCTACTCTTCATGCTCACTTTGTTCATGCTGTTCAACTTCTTGGCGGCCAT…
>Carhir_CARHR181540.1
ATGATGATGTTAGAGTCAAGAAGCAGTATGAGAGGTTCCAACACAGTCCCAGATCTGTCCCTTCAGATCAGTCTTCCTAATTCTCACGCCGGAAAACCTCTTCCCGGCGGTGAACGGAGTTCTACTAGCAGTGACTCCGGAAGCAGCCTCAGTGAGTTAAGCCATGAGAACAACTTCTTCAACAAATCTCTCTTGAGCTTAGGCTTTGATCATCATCAAAGGCACTCACATGTGTTCCAACCTCAAATCTACGGCCGAGATTTCAAGAGAAGCTCATCATCAATGGTTGGTCTTAAACGAAGCATTCGAGCTCCAAGAATGAGATGGACTTCTACTCTTCATGCTCACTTCGTTCATGCTGTTCAACTCCTTGGCGGCCATGAAAGAGCAACGCCGAAA…
>Capgra_Cagra.0873s0003.1
ATGATGATGTTAGAGTCAAGAAACAGTATGAGAGCTTCAAACACACTTCCAGATCTGTCTCTTCAGATCAGCCTTCCTAACTCTCAAGCCATGAAACCTCTTAATGGTGGTGACCGGAGCTCCACGAGTAGTGACTCAGGAAGCAGCCTAAGTGAGCTAAGCCATGAGAACAGCTTCTTGATCAACAAACCTCTCTTGAGCTTAGGCTTTGATCATCATCATCATCATCATCATCAACAAAGGCACTCAAACATGTTCCAACCACAAATCTATGGCCGAGATTTCAAGAGAAGCTCATCATCAATGGTTGGTCTTAAACGAAGCATTAGAGCTCCAAGAATGAGATGGACTTCTACTCTTCATGCCCACTTTGTTCATGCTGTTCAACTTCTTGGCGGC…
>Capcru_Carub.0008s0640.1
ATGATGATGTTAGAGTCAAGAAACAGTATGAGAGCTTCAAACACACTCCCAGATCTGTCTCTTCAGATCAGCCTTCCTAACTCTCAAGCCATGAAACCTCTTAATGGTGGTGACCGGAGCTCCACAAGTAGTGACTCAGGAAGCAGCCTAAGTGAGCTAAGCCATGAGAACAGCTTCTTGATCAACAAACCTCTCTTGAGCTTAGGCTTTGATCATCATCATCATCATCAGCATCAACAAAGGCACTCAAACATGTTCCAACCACAAATCTATGGCCGAGATTTCAAGAGAAGCTCATCATCAATGGTTGGTCTTAAACGAAGCATTAGAGCTCCAAGAATGAGATGGACTTCTACTCTTCATGCTCACTTTGTTCATGCTGTTCAACTTCTTGGCGGC…
>Camsat_Csa19476s010.1
ATGTTCCAACCCCAAATCTACGGCAGAGATTTCAAGAGAAGCTCATCATCAATGGTTGGTCTTAAACGAAGCATTCGAGCTCCAAGAATGAGATGGACTTCCACTCTTCATGCTCACTTTGTCCATGCTGTTCAACTTCTTGGCGGCCATGAAAGTATT
>Camsat_Csa18g011370.1
ATGATAATGTTAGAGTCAAGAAACAGTATCATGAGAGCTTCAACCTCAGTTCCAGATCTGTCCCTTCAGATCAGCCTTCTTCCTAACTCTCACGCCGGGAAACCTCTTCACGGCGGTGACCGGAGCTCCACAAGCAGTGACTCCGGAAGCAGCCTCAGTGAGTTGAGCCATGAGAACAACTTCTTCAACAAACCTCTCTTGAGCTTAGGCTTTGATCACCATCATCACCAACATCATCATCAAAGGCACTCAAACATGTTCCAACCCCAAATCTACGGCAGAGATTTCAAGAGAAGCTCATCATCAATGGTTGGTCTTAAACGAAGCATTCGAGCTCCAAGAATGAGATGGACTTCCACTCTTCATGCTCACTTTGTCCATGCTGTTCAACTTCTTGGC…
>Camsat_Csa11g072430.1
ATGATAATGTTAGAGTCAAGAAACAGTATCATGAGAGCTTCAAACTCAGTTCCAGATCTGTCCCTTCAGATCAGCCTTCTTCCTAACTCTCACGCCAGGAAACCTCTTCACGGCGGGGACCGGAGCTCCACAAGCAGTGACTCCGGAAGCAGCCTCAGTGAGTTGAGCCATGAGAACAACTTCTTCAACAAACCTCTCTTGAGCTTAGGCTTTGATCACCATCATCACCAACATCATCATCAAAGGCACTCAAACATGTTCCAACCCCAAATCTACGGCAGAGATTTCAAGAGAAGCTCATCATCAATGGTTGGTCTTAAACGAAGCATTCGAGCTCCAAGAATGAGATGGACTTCCACTCTTCATGCTCACTTTGTCCATGCTGTTCAACTTCTTGGC…
>Camsat_Csa20g066330.1
ATGATAATGTTAGAGTCAAGAAACAGTATCATGAGAGCTTCAAACTCAGTTCCAGATCTGTCCCTTCAGATCAGCCTTCTTCCTAACTCTCAAGCCGGGAAACCTCTTCACGGCGGGGACCGGAGCTCTACAAGCAGTGACTCCGGAAGCAGCCTCAGTGAGTTGAGCCATGAGAACAACTTCTTCAACAAACCTCTCTTGAGCTTAGGCTTTGATCACCATCATCACCAACATCATCATCAAAGGCACTCAAACATGTTCCAACCCCAAATCTACGGCAGAGATTTCAAGAGAAGCTCATCATCAATGGTTGGTCTTAAACGAAGCATTCGAGCTCCAAGAATGAGATGGACTTCCACTCTTCATGCTCACTTTGTCCATGCTGTTCAACTTCTTGGC…
>Dipstr_Distr.0035s0690.1
ATGGTGATGATGATGACGATGATGTTAGAGTCAAGGAGCAGTATGAGAGATGTCATCCCAGATCTGTCTCTTCAGATCAGCCTTCCAAACTCCGGAAAAAGCAGTGGTGACATGAGCTCCTCCTCCACCAACAACAGCAGCAGCAGCAGCAACAGTGAGAAGAAGAACAAACCTCTCTTGAGCTTAGGCTTTCATCAGAGGCATGACTTCCAACCACAAATCTATGGAAGAGATTTCAAGAGAAGCTCATCAACAATGTCAAGAGCTCCACGAATGAGATGGACTTCCACTCTTCATGCCCACTTCGTCCATGCTGTCCAACTTCTTGGCGGCCATGAAAGAGCAACCCCAAAATCAGTGTTGGAGCTGATGAATGTGAAGGATCTAACCCTAGCTCAT…
>Eutesa_Thhalv10003256m
ATGATGATGTTAGAGTCAAGAAGCAATATGAGAGGTTTAAAGTCAGTCCCAGATCTGTCTCTTCAGATCAGCCTTCCTAACTCTCACGCCCTGAAACCTCTACACGGCGGTGACCGAAGCTCAACCACAAGCAGTGATTCCGGAAGCAGTCTCAGTGAGTTGAGCCATGAGAACAACTTTTTCAACAAACCTCTCTTGAGCTTAGGTTTTGATCATCATCGTCGTCAACAAAGGCACTCACACATGTTCCAACCACAAATCTACGGTCGAGATTTCAAGAGAAGCTCATCATCAATGGTTTGTCTTAAGCGAAGCATTCGAGCTCCAAGAATGAGATGGACTTCTACTCTCCATGCTCACTTTGTCCATGCCGTTCAACTCCTTGGCGGCCATGAAAGA…
>Eruves_Eruve.4436s0003.1
ATGATCAAGTTCGAGTCAAGAAGCAGTATGAGAGGTTCCACCTCAGTCCCGGATCTGTCTCTTCAGATCAGCCTTCCAAACTCTCACGCCGACAAACCTCTTCACGGCGGTAACCTGAGCTCCACCACAAGCAGCGACTCCGGAAGTAGCCTCAGTGAGTTGAGCCATGAGAACAACTTCTTCAAGAAATCTCTCTTGAGTTTAGGCTTTGAACATCATTCATATCATCACCATCAGAGGCACAGCTCAAACATGTTCCAACCACAAATCTACGGTCGAGATTTCAAGAGAACCTCATCTTCAGTGATTAGTCTTAAACGAAGCATCCGAGCTCCAAGAATGAGATGGACTTCTACTCTACATGCTCATTTCGTCCATGCTGTTCAACTTCTTGGAGGC…
>Eruves_Eruve.4436s0002.1
ATGATCAAGTTCGAGTCAAGAAGCAGTATGAGAGGTTCCACCTCAGTCCCGGATCTGTCTCTTCAGATCAGCCTTCCAAACTCTCACGCCGACAAACCTCTTCACGGCGGTAACCTGAGCTCCACCACAAGCAGCGACTCCGGAAGTAGCCTCAGTGAGTTGAGCCATGAGAACAACTTCTTCAAGAAATCTCTCTTGAGTTTAGGCTTTGAACATCATTCATATCATCACCATCAGAGGCACAGCTCAAACATGTTCCAACCACAAATCTACGGTCGAGATTTCAAGAGAACCTCATCTTCAGTGATTAGTCTTAAACGAAGCATCCGAGCTCCAAGAATGAGATGGACTTCTACTCTACATGCTCATTTCGTCCATGCTGTTCAACTTCTTGGAGGC…
>Isatin_Isati.5353s0004.1
ATGAGAGGTTCACACTCAGTCCCAGATCTGTCTCTTCAAATTAGCCTTCCTAACTCACACGCCGGAAAACCTCTTCACGGCGGTGACCGGAGCTCCACCACAAGCAGTGACTCGGGAAGCAGCCTCACTGAGTTGAGCCATGAAAACAACTTCTTCAAGAAACCTATCTTGAGCTTAGGCTTTGATCATCATCATCTTCATCAGAGGCACTCACACATGTTCCAACCACAAATCTACGGTCGAGATTTCAAAAGAACCTCGTCATCAATGGTTGGTCTTAAACGAAGCATTCGAGCTCCAAGAATGAGATGGACTTCTACTCTCCATGCTCATTTCGTCCATGCTGTTCAACTTCTTGGAGGCCATGAGAGAGCAACGCCTAAATCAGTTTTGGAGCTG…
>Isatin_Isati.0149s0009.1
ATGATGATGTTAGAGTCAAGAAGCAGTATGAGAGGTTCACACTCAGTCCCAGATCTGTCTCTTCAGATAAGCCTTCCTAACTCACACGCCGGAAAACCTCTTCACGGCGGTGACCGGAGCTCCACCACAAGCAGTGACTCCGGAAGCAGCCTCACTGAGTTGAGCCATGAAAACAATTTCTTCAAGAAACCTATCCTGAGCTTAGGCTTTGATCATCCTCATCTTCATCAGAGGCACTCACACATGTTCCAACCACAAATCTACGGTCGAGATTTCAAGAGAACGTCATCATCAACGGTTGGTCTTAAACGAAGCATTCGAGCTCCAAGGATGAGATGGACTTCTACTCTCCATGCCCATTTCGTCCATGCTGTTCAACTTCTTGGAGGCCATGAGAGA…
>Isatin_Isati.3050s0001.1
ATGGTCAACAAAGAAGGAAAGGTAGAGAAAGAGGCAGAGCAGAAGATAGAGGACAATAATAATGATGAAGAAGTCGATGAAGGAACTGACACAAATTCGCCAAACTCATCATCTGTGCTAAAGACCCAAAGAGTTTCTTGGTCATCCACAAAGGGAGTGTCTATGAGCATGTCTACACAAGCAGATCCTCGCATGGGAACAACTCATCACACAAAGAATGATGGAGAAAAAGAGGCGATTAACACTCATCTCAGCTTAGAATTCACGTTGGGGCGGCCGAGTTGGCGGATAGACTATGCGGAACCCTCCAGCGATCTAACCCTTCTCAAGTGCTAA
>Isatin_Isati.3808s0008.1
ATGATGATGTTAGAGTCAAGAAGCAGTATGAGAGGTTCACACTCAGTCCCAGATCTGTCTCTTCAAATTAGCCTTCCTAACTCACACGCCGGAAAACCTCTTCACGGCGGTGACCGGAGCTCCACCACAAGCAGTGACTCGGGAAGCAGCCTCACTGAGTTGAGCCATGAAAACAACTTCTTCAAGAAACCTATCTTGAGCTTAGGCTTTGATCATCATCATCTTCATCAGAGGCACTCACACATGTTCCAACCACAAATCTACGGTCGAGATTTCAAAAGAACCTCGTCATCAATGGTTGGTCTTAAACGAAGCATTCGAGCTCCAAGAATGAGATGGACTTCTACTCTCCATGCTCATTTCGTCCATGCTGTTCAACTTCTTGGAGGCCATGAGAGA…
>Lunann_Luann.0148s0024.1
ATGATGATGTTAGAGTCAAGGAACAGTATGAGAGACTCAAACTCAGTCCCAGATCTATCCCTTCAGATCAGTCTTCCTAACTCTCACGCCGGAAAACCTCTTCACGGCGGTGACCGGAGCTCCACAAGCAGTGATTCCGGCAGCAGTCTCAGTGAGTTAAGCCATGAGAACAACTTCTTTAATAAACCTCTCTTGAGCTTAGGCTTTGATCATCATCATCCTCAGAGACACTCAAACATGTTCAAACCTCAAATCTATGGTCGAGATTTCAAGAGAAGCTCAACATCAATGGTTGGTCTTAAAAGAAACATTCGAGCTCCAAGAATGAGATGGACTTCTACTCTTCATGCCCACTTTGTTCATGCTGTTCAACTCCTTGGCGGCCATGAAAGAGCAACG…
>Leaala_KE156691.1_FGenesh11.1
ATGATGATGTTAGAGTCAAGAACCAGTATGAAAGATTCAAACACAATCATCCCAGATCTGTCTCTTCAGATCAACCTTCCTAACTCTCACACCAATGAACAAAGCTCTACCAGCAGTGACTCCCCAACCAGTCTTAGTAACTTAAGCCATGAGAACAACTTCTTCAACCAACCTCTCTTTACCTTAAAACTTGATCATCACCATCAAAGACACTCACATGTGTTCCAACCTAAAATCTACGGTCAAGATTTCAAGAAAAGCTCATCATCAATGGTTGGTATTAAACGTAGCATTAGAGCTCCAAGAATGAAATGGACTTGTACTCTTCATGCTCATTTTGTTCATGCTGTTCAACTCCTTGGTGGCCATGAAAGAGCAACGCCTAAATCAGTGTTGGAG…
>Leaala_KE157187.1_FGenesh8.1
ATGATGTTGTTAGAGTCAAGAAGAAGCATGAGAGGTTCAAACTCAGTTGTCACAGATCTATCACTTCAGATCAGCCTTCCTAACTCTCATACCGGAAAAACTCTTCCCGTCGGCGTTGAACGGAGCTCCACAAGTAGTGACTCCGGAAGCAGTTTCAGTGAGTTAAGCCATGAGAACAACTTCTTCAACAAACCTATCTTGAGCTTAGGTTTTGATCATTATCAAAGGCACTCACATCATGTGTTTCAACCACAAATCTACGGCCGAGATTTCAAGAGAAGTTCATCATCAATGGTTGGTCAAAAACGAAGCATTAGAGCTCCAAGAATGAGATGGACTTCGACTCTTCATGCTCATTTTGTACATGCTGTTCAACTTCTTGGTGGCCATGAAAGAGCA…
>Lepsat_Lesat.0027s0337.1
ATGATGATGTTAGAGTCAAGCAGAACTATGAAAAACTCAAACTCAGTCCCAGATCTGTCTCTTCAAATCAGCCTTCCTAACTCTCACACCAGAAACTCTCTTCACGCCGGTGACCGGAGCTCCACAAGCAGTGACTCAGGAAGCAGTCTCAGTGAGTTAAGCCATGAGAACAACTTCTTCAACAAACCTCTCTTAAGCTTAGGCTTTAATCATCATCAAAGACACTTAAACATGTTTCAACCACAAATCTATGGTCGAGATTTCAAGAGAAGTTCATCAACAATGGTGGGTCTTAAACGAAGTATTCGAGCTCCAAGAATGAGATGGACTTCTACTCTTCATGCTCACTTTGTTCATGCTGTTCAACTCCTTGGTGGCCATGAAAGAGCAACGCCTAAA…
>Lepsat_Lesat.0014s0675.1
ATGATGCTATTAGAGTCAAGGAGAAGCATGAAAGGCTCAAACTCAGTCCCAGATCTGTCTCTTCAAATCAGCCTTCCTAACTCTCACGCCGGAAAGTCTCTTCACGCCGGTGACCGGAGCTCCACAAGCAGTGACTCTGGAAGCAGTCTCAGTGAGTTAAGTCATGAGAACAACTTCTTGAACAAACCTCTCTTAAGCTTAGGCTTTGATCATCATCAAAGACACTTAACCATGTTTCAACCTCAAATCTATGGTCGAGATTTCAAGAGAAGTTCATCATCAATGGTGGGTCTTAAACGAAGTATTCGAGCTCCAAGAATGAGATGGACTTCAACTCTTCATGCTCACTTTGTTCATGCTGTTCAACTCCTTGGTGGCCATGAAAGAGCAACACCAAAA…
>Noccae_OVBC01001998.1_FGenesh1.1
ATGATGATGTTAGAGTCAAGGAGCAGTATGAGAGGTTCAAACACAGTCCCAGATCTGTCTCTTCAGATCAGCCTTCCTAACTCTCACGCCGGAAAACCTCTTCACGGCGGTGACCGGAGCTCCACAACAAGCAGTGATTCAGGCAGTAGTCTCAGTGAGTTGAGTCACGAGAACAACGTCTTCAACAAACCTCTCTTGAGATTAGGCTTTGATCATCATCACCATCAGAGGCACTCAAACATGTTCCAACCACAAATCTACGGTCGAGATTTCAAGAGAAGCTCATCATCAATGGTTGGTCTTAAGCGAAGCATCCGAGCTCCAAGAATGAGATGGACTTCTACTCTCCATGCCCACTTCGTCCATGCCGTTCAACTTCTCGGCGGCCATGAAAGAGCA…
>Rorisl_Roisl.0036s0102.1
ATGATGATGTTAGAGTCAAGAAGCAGTATGAGAGGTTCAAACTCAGCCGTCCCAGATCTGTCCCTTCAGATCAGCCTTCCTAACTCTCACGCCGGCAAACCTCTTCCCGGCGGTGAACGGAGCTCCACTAGCAGTGACTCAGGAAGCAGTCTCAGTGAGTTAAGCCATGAGAACAACTTCTTCAACAAACCTCTCTTGAGCTTAGGTTTTGATCATCATCAAAGGCACTCACACGTGTTCCAACCCCAAATCTACGGCCGAGATTTCAAGAGAAGCTCATCATCAATGGTTGGTCTAAAACGAAGCATTCGAGCTCCAAGAATGAGATGGACTTCTACTCTTCATGCTCATTTTGTTCATGCTGTTCAACTCCTTGGCGGCCATGAAAGAGCAACGCCG…
>Rapsat_Rsa1.0_03370.1_g00002.1
ATGTTCGAGTCAAGAAGCAATATGAGAGGTTCAAACTCAGTCCCAGATTTGTCTCTTCAGATCAGCCTTCCCAACTCTCACGCCGAGAAACCCCTTCACAGCAGTAACCGGAGCTCCACCACAAGCAGTGACTCCGGAAGCAGTCTCAGTGAGTTAAGCCATGAGAACGGCTTCTTGAAGAAACATCTTTTGAGCTTAGGCTTTAACCATCATAATCCATATCATCATTATCAGAGGCACAGCTCAAAAATGTTCCAGCCACAAATCTACGGTCGAGATTTCAAGAGAACCTCATCTTCAGTGGTTAGTCTTAAACGAAGCATTCGAGCTCCAAGAATGAGATGGACTTCTACTCTCCATGCTCATTTCGTCCATGCTGTTCAACTTCTTGGAGGCCAT…
>Sinalb_Sialb.0316s0040.1
ATGATCATGTTCGAGTCAAGAAGCAGTAAGAGAGGTTCAAACACAGTCCCAGATCTGTCTCTTCAGATCAGCCTTCCAAACTCTCACACCGAGAAACCTCTTCACGGCGGTAACCGGAGCTCCACCACAAGCAGTGACTCGGGAAGTAGCCTCAGTGAGTTGAGCCATGAGAAAAACTTCTTGAAGAAACCTCTCTTGAGCTTAGGGTTTGATCATCATCATCCATATCATCAGAGGCACAGCTCAAACATGTTCCAACCACAAATCTACGGTCGAGATTTCAAGAGAACCTCATCTTCAGTGGTTAGTCTTAAACGAAGCATTCGAGCTCCAAGAATGAGATGGACTTCTACTCTTCATGCTCATTTCGTCCATGCTGTCCAACTTCTTGGAGGCCAT…
>Schpar_AFAN01000043.1_FGenesh10.1
ATGATGATGTTAGAGTCAAGAAGCAGCATGAGAGTTTCAAACTCAGTCCCAGATCTGTCTCTTCAGATCAGCCTTCCAAACTCTCACGCCGAGAAAACTCTTCACGGCGGTGACCGGAGCTCCACCACCACAAGCAGTGATTCCGGAAGCAGCCTTAGTGACTTGAGCCATGAGAACAACTTCTTCAAGAAACCTCTCTTGAGCTTAGGCTTTGATCATTATCATCACCATCATCATCAACATCAGAGGCACAACTCAAACATGTTCCAACCACAAATTTACGGTCGAGATTTCAAGAGAACCTCATCATCAATGGTTGGTCTTAAACGAAGCATTCGAGCTCCAAGAATGAGATGGACTTCTACTCTACATGCTCATTTCGTCCATGCTGTTCAACTT…
>Schpar_AFAN01000280.1_FGenesh3.1
ATGATGATGTTAGAGTCAAGAAGCAGCATGAGAGTTTCAAACTCAGTCCCAGATCTGTCTCTTCAGATCAGCCTTCCAAACTCTCACGCCGAGAAAACTCTTCACGGCGGTGACCGGAGCTCCACCACCACAAGCAGTGATTCCGGAAGCAGCCTTAGTGACTTGAGCCATGAGAACAACTTCTTCAAGAAACCTCTCTTGAGCTTAGGCTTTGATCATTATCATCACCATCATCATCAACATCAGAGGCACAACTCAAACATGTTCCAACCACAAATTTACGGTCGAGATTTCAAGAGAACCTCATCATCAATGGTTGGTCTTAAACGAAGCATTCGAGCTCCAAGAATGAGATGGACTTCTACTCTACATGCTCATTTCGTCCATGCTGTTCAACTT…
>ArathaSHA_ATSHA-5G64790.1
ATGATGATGTTAGAGTCAAGAAACAGTATGAGAGCTTCAAACTCAGTCCCAGATCTGTCTCTTCAGATCAGTCTTCCTAACTATCACGCCGGAAAACCTCTTCACGGCGGTGACCGGAGCTCCACAAGCAGTGATTCTGGAAGCAGCCTCAGTGACCTGAGCCATGAGAACAACTTCTTCAACAAACCTCTCTTGAGCTTAGGATTTGACCATCATCATCAAAGGCGCTCAAACATGTTCCAACCTCAAATCTACGGTCGAGATTTCAAGAGAAGCTCATCATCAATGGTTGGTCTTAAACGAAGCATTCGTGCTCCAAGAATGAGATGGACTTCTACTCTTCATGCTCACTTCGTCCATGCTGTTCAACTTCTTGGCGGCCATGAAAGAGCAACGCCT…
>Sisiri_KE153721.1_FGenesh64.1
ATGATGATGTTAGAGTCAAGAAGCAGTATGAGAGGCTCAAACTCAGTCCCAGATCTGTCTCTTCAGATAAGCCTTCCTAACGCACACGCAGGAAAACCTCTTAACGGCGGTGACCGGAGCTCCACCACAAGCAGTGACTCCGGAAGCAGTATCAGTGAGTTGAGCTATGAAAACAAGTTATTCAAGAAACCTCTCTTGAGCTTAGGCTTTGATCATCATCATCATCAGAGGCACTCAAGCATGTTCCAACCACAAATCTACGGCCGAGATTTCAAGAGAACTTCATCATCAACGGTCGGTCTTAAACGAAGCATTCGAGCTCCAAGAATGAGATGGACTTCTACTCTCCATGCTCATTTCGTCCATGCCGTTCAACTTCTTGGAGGCCATGAAAGAGCA…
>Stapin_Stapi.0179s0012.1
ATGATGATGTTAGAGTCAAGAAGCAGTATGAGAGGTTCAAACTCAGTCCCAGATCTGTCTCTTCAGATAAGCCTTCCTAACTCACACGCAGGAAAACCTCTTCACGGTGTTGACCGGAGCACCATCACAAGCAGTGACTCCGGAAGCAGTCTCAGTGAGTTGAGCCATGAGAACAACTTCTTCAAGAAACCTCTCTTGAGGTTAGGCTTTGATCATCATCATCATCATCATCAGAGGCATTCAAGCATGTTCCAACCAAAAATCTACGGTCGAGATTTCAAGAGAACCTCATCATCAACGGTTGGTCTTAAACGAAGCATTCGAGCTCCAAGAATGAGATGGACTTCTACTCTCCATGCTCATTTCGTCCATGCTGTTAAACTTCTTGGAGGCCATGAA…
>Stapin_Stapi.0005s0026.1
ATGATGATGTTAGAGTCAAGAAGCAGTATGAGAGGTTCAAACTCAGTCCCAGATCTGTCGCTTCAGATCAGCCTTCCAAACTCTCACGCCAGGAAACCTCTTCACGGCGGTGACCGGAGCTCCACCACAAGCAGTGATTCCGGAAGCAGCCTCAGTGAGTTGAGTCATGAGAACAACTTCTTCAAGAATCCTCTCTTGAGCTTAGGCTTTGATCATCATCATTCATATCATCATCATCATCAACAGAGGCACAGCTCAAACATGTTCCAACCACAAATCTACGGTCGAGATTTCAAGAGAACCTCATCTTCAATGGTTGGTCTTAAACGAAGCATTCGAGCTCCAAGAATGAGATGGACTTCTACTCTCCATGCTCATTTCGTCCATGCTGTTCAATTT…
>Thlarv_Thlar.0078s0014.1
ATGATGATGTTAGACTCCAGAAGCAGTATGAGAGATTCAAACTCAATCCTTGATCTGTCTCTTCAGATCAGCCTTCCTAACTCTCACGCCGGAGAACTTCTTCACGGCGGTGACCGAAGCTCCACCACAAGTAGTGATTCTGGAAGCAGTCTCAGTGAGTTGGGCCATGAGAACAACTTCTTCAACAAACCTCTCCTAAGCTTAGGTTTTGATCATCATTATCGTTATCAAAGGCACTCAAACATGATCCAACCACAAATCTACGGTCGAGATTTCAAGAGAAGCTCATCATCAATGGTTTGTCTTAAACGAAGCATTCGAGCTCCAAGAATGAGATGGACTTCTACTCTCCATGCGCACTTTGTCCATGCTGTTCAGCTTCTTGGCGGCCATGAAAGA…

[truncated: 93 more sheets: My23, Tt2, Ttg1, Dcr, Csla2, Prx56, Uuat1, Exo70a1, Ap2, Irx14, Lug, Tt8, Ga1, Gid1b, Cobl2, Nars1, Myb5, Sec8, Muci21, Adk1 …]
