# Supplementary material for: Myxospermy Evolution in Brassicaceae: A Highly Complex and Diverse Trait with Arabidopsis as an Uncommon Model
Source: Cells. 2021 Sep 18;10(9):2470. doi: 10.3390/cells10092470 (PMC8469493; doi:10.3390/cells10092470)
Supplement: Supplementary file 1 [file cells-10-02470-s001.zip › Viudes et al_Table S5-S9.xlsx]

## Sheet: Table S5 Myxospermy
Table S5: Sorting of the studied species according to the myxospermy occurrence highlights the absence of correlation with the presence of A. thaliana MSC tool box gene orthologs related to mucilage synthesis in A. thaliana. Presence myxospermy (Yes) or it absence (No) are based on the results in Fig. 2. Top genes are the most directly implicated genes in synthesis of SM in A. thaliana (Table S1).
			Myxospermy	Yes	Yes	Yes	Yes	Yes	Yes	Yes	Yes	Yes	Yes	Yes	Yes	Yes	Yes	Yes	Yes	Yes	Yes	No	No	No	No	No	No	No	No	NA	Yes	No	Yes	No	No
			PCW Rupture Zone	Radial	Radial	Radial	Intermediate	Intermediate	Central	Central	Central	unicel	unicel	Central	Central	Central	?	Central	Central	Central	No	No	No	No	No	No	No	No	No	NA	NA	NA	NA	NA	NA
			Columella	Yes	Yes	Yes	Yes	Yes	Yes	?	Yes	No	No	No	No	No	No	No	No	No	No	Yes	No	No	No	No	No	No	No	NA	NA	NA	NA	NA	NA
			Lineage	1	1	1	1	1	1	1	1	1	1	2	2	2	2	2	2	4	Basal	1	2	2	2	2	2	2	2	1	2	2	3	Clade C
			Tribe	Camelineae	Camelineae	Camelineae	Camelineae	Camelineae	Camelineae		Cardamineae	Cardamineae	Cardamineae	Brassiceae	Brassiceae								Brassiceae	Brassiceae	Brassiceae	Brassiceae	Brassiceae			Camelineae	Brassiceae			Biscutelleae
			Species name	Arabidopsis thaliana	Arabidopsis lyrata	Arabidopsis halleri	Capsella rubella	Capsella grandiflora	Camelina sativa	Lepidium sativum	Cardamine hirsuta	Rorripa islandica	Leavenworthia alabamica	Brassica nigra	Sinapis alba	Sisymbrium irio	Stanleya pinnata	Schrenkiella parvula	Eutrema salsugineum	Arabis alpina	Aethionema arabicum	Boechera stricta	Brassica rapa	Brassica napus	Brassica oleraceae	Brassica juncea	Raphanus sativus	Thaspi avense	Noccae caerulescens	Capsella bursa-pastoris	Eruca vesicaria	Isatis tinctoria	Dipterocarpus strictus	Lunaria annua	Biscutella laevigata
AGI Code	Gene abreviation	Impact	Role	1	2	3	4	5	6	8	9	10	11	16	17	19	20	21	23	25	27	7	12	13	14	15	18	22	24	A	B	C	D	E	F
At5g04160	UUAT1	Medium	Pectin	1	1	1	1	1	3	2	2	1	2	2	2	1	1	1	1	1	2	1	2	4	2	5	1	1	1	2	3	2	1	1	2
At5g15740	RRT1	Medium	Pectin	1	1	1	1	1	3	2	1	1	2	1	2	1	4	1	1	1	1	1	2	6	3	4	3	1	1	2	3	2	1	1	1
At1g18580	GAUT11	High	Pectin	1	1	1	1	1	4	2	1	1	3	0	4	1	1	2	1	1	1	1	3	7	3	5	3	1	1	2	4	4	1	1	2
At1g21070	URGT2	High	Pectin	1	1	1	1	1	3	2	1	1	2	0	1	1	1	1	1	1	1	1	2	4	3	3	1	1	1	2	1	3	1	2	2
At1g53500	MUM4 / RHM2	High	Pectin	1	1	1	1	1	5	2	1	1	4	1	2	1	1	1	1	0	1	1	2	5	3	7	5	1	1	3	3	3	1	2	2
At1g74800	GALT5	Medium	Pectin	1	1	1	1	1	4	2	1	1	2	1	2	1	2	2	1	1	2	1	2	5	2	4	7	1	1	2	4	3	1	1	4
At2g18280	TPL2	Medium	Pectin	1	1	0	1	1	3	2	1	1	2	0	1	1	1	2	1	0	3	1	1	2	1	2	1	1	1	2	2	4	1	3	3
At5g09870	MUM3 / CESA5	High	Cellulose	1	1	1	1	1	4	2	1	1	2	1	2	1	1	1	1	1	0	1	1	2	1	2	1	1	1	2	1	2	1	2	1
At3g29810	COBL2	High	Cellulose	1	1	2	1	1	4	2	2	1	1	0	2	1	1	1	1	0	1	1	2	6	7	4	2	1	1	1	4	5	1	1	1
At5g23940	DCR	High	Cutin	1	1	1	1	1	3	2	1	1	2	0	2	1	0	1	1	1	1	1	2	4	2	4	2	1	1	2	3	3	1	2	1
At5g67360	SBT1.7 / ARA12	High	Extrusion	1	1	1	1	1	3	2	2	1	1	1	1	2	2	1	1	0	1	1	2	4	3	3	2	1	1	2	2	2	1	2	1
At5g67030	ABA1	High	Hormone	1	1	1	1	1	3	2	5	1	2	2	2	1	0	1	1	1	2	1	2	5	2	4	4	1	1	2	5	7	1	1	2
At5g22740	CSLA2	High	Mannan	1	1	1	1	1	4	2	1	1	3	1	4	2	4	1	1	1	1	1	3	6	3	4	4	1	2	4	6	4	1	2	5
At1g28240	MUCI70	High	Pectin	1	1	1	1	1	3	2	1	1	2	0	4	1	2	1	1	1	1	1	3	7	2	6	3	1	1	2	4	3	1	2	2
At1g63930	ROH1	High	Pectin	1	1	1	1	1	4	2	1	1	1	0	2	1	1	1	1	1	1	1	1	2	1	1	2	1	1	2	1	4	1	2	1
At2g20650	FLY2	High	Pectin	1	1	1	1	1	2	2	5	1	1	0	2	1	1	1	1	0	1	1	1	2	1	2	1	1	1	2	2	3	1	1	1
At4g28370	FLY1	High	Pectin	1	1	1	1	1	4	2	1	1	2	0	1	1	2	1	1	0	1	1	1	2	1	2	1	1	1	3	2	3	0	2	2
At3g09820	ADK1	High	Pectin	1	1	1	1	1	18	2	2	1	2	1	2	1	2	1	1	1	1	1	1	2	1	2	7	1	1	2	1	5	1	1	2
At3g10380	SEC8	High	Pectin	1	2	1	1	1	9	2	1	1	2	4	3	2	2	1	1	0	1	1	4	6	3	8	3	1	1	2	4	4	1	2	2
At3g51160	MUR1	High	Pectin	2	2	2	2	2	8	4	3	2	3	5	4	2	2	2	1	2	2	2	5	12	6	10	5	2	2	2	7	3	2	3	2
At5g63800	MUM2 / BGAL6	High	Pectin	1	1	0	1	1	3	2	1	1	2	2	2	1	1	1	1	1	1	1	2	5	2	4	6	1	1	2	3	3	1	1	4
At1g76880	DF1	High	Regulation	1	1	1	1	1	4	2	1	1	2	1	3	2	0	1	1	1	1	1	3	6	3	5	5	1	2	2	6	1	1	2	2
At1g79840	GL2	High	Regulation	1	0	1	1	1	4	2	2	1	1	1	1	1	3	2	1	1	1	1	1	2	1	1	1	1	1	2	1	1	1	1	3
At1g80330	GA3OX4	High	Regulation	1	1	1	1	1	1	1	1	1	2	0	1	1	1	1	1	0	1	1	1	2	1	2	1	1	4	2	3	1	1	1	2
At2g32700	LUH / MUM1	High	Regulation	1	1	1	1	1	4	2	3	1	3	3	3	1	2	1	1	0	2	1	4	10	6	7	8	1	1	2	3	7	1	2	3
At2g37260	TTG2 / DSL1	High	Regulation	1	1	1	1	1	4	2	3	1	1	2	2	1	1	1	1	0	1	1	2	5	2	5	2	1	1	2	2	4	1	1	2
At3g08850	RAPTOR1B	High	Regulation	1	1	1	1	1	3	2	1	1	4	4	3	1	2	1	1	1	1	1	1	4	3	4	3	1	1	2	3	2	1	1	2
At3g13540	MYB5	High	Regulation	1	1	1	1	1	3	2	1	1	1	4	1	1	2	1	1	1	1	1	2	4	2	6	2	1	1	2	3	5	1	2	1
At4g09960	STK	High	Regulation	1	1	1	1	1	3	2	2	1	1	1	1	2	2	1	1	0	1	1	2	4	3	3	2	1	1	2	2	2	1	2	1
At4g32551	LUG	High	Regulation	1	1	1	1	1	3	2	1	1	3	1	3	1	3	1	1	3	1	1	3	7	3	6	2	1	1	2	6	4	1	2	2
At4g36920	AP2	High	Regulation	1	1	1	1	1	4	2	1	1	3	1	2	1	0	1	1	1	1	1	2	5	2	3	2	1	1	2	3	4	1	2	2
At5g24520	TTG1	High	Regulation	1	1	1	1	1	8	2	2	1	2	0	1	1	1	1	1	1	1	1	3	4	2	2	1	1	1	1	3	4	1	1	1
At5g40330	MYB23	High	Regulation	1	1	1	1	1	3	2	1	1	0	1	2	0	2	2	1	1	1	1	1	1	1	2	1	1	1	2	1	5	1	1	3
At5g63840	RSW3	High	Regulation	1	1	0	1	1	4	2	1	1	2	2	1	1	1	1	1	1	1	1	2	8	2	4	6	1	1	2	1	3	1	2	7
At5g66730	ENY / IDD1	High	Regulation	1	1	1	1	1	4	2	1	1	1	2	2	1	0	1	1	1	1	1	2	3	2	4	2	1	1	2	2	3	1	2	2
At1g24260	SEP3	High	Regulation	1	1	1	1	1	4	2	3	1	2	0	5	1	0	1	1	1	1	1	3	7	4	7	2	1	1	2	4	2	1	2	3
At1g09330	ECH	High	Secretion	1	1	1	1	1	3	2	1	1	3	0	3	1	3	1	1	1	2	2	3	5	3	4	3	2	1	2	5	2	1	2	3
At1g60780	AP1M2	High	Secretion	1	1	0	1	1	3	2	1	1	1	0	2	1	1	2	1	1	1	1	2	5	3	3	2	1	1	2	2	5	1	2	2
At2g35630	MOR1	High	Secretion	2	2	2	2	2	4	5	3	2	1	3	2	1	2	1	1	1	6	2	3	10	2	1	4	1	1	5	4	2	1	2	3
At5g03540	EXO70A1	High	Secretion	1	1	1	1	1	5	2	2	1	2	1	3	1	0	2	1	1	1	1	2	5	2	3	2	2	1	2	4	3	1	2	2
At2g27600	SKD1	High	Unknow	1	1	1	1	1	7	2	1	1	3	2	3	1	2	1	1	0	0	1	2	4	3	4	2	1	1	2	3	3	0	2	3
At2g28110	IRX7	High	Xylan	1	1	1	1	1	3	2	1	1	1	3	2	1	2	1	1	1	1	1	2	5	2	4	2	1	1	2	5	4	1	1	1
At3g10320	MUCI21 / MUM5	High	Xylan	1	1	1	1	1	3	2	1	1	1	1	1	1	2	1	1	1	1	1	1	2	1	1	1	1	1	2	1	2	1	2	2
At4g36890	IRX14	High	Xylan	1	1	1	1	1	3	2	2	1	2	1	1	1	2	1	1	1	1	1	1	4	2	2	1	1	1	2	2	2	1	2	1
At5g49360	BXL1	High	Xylan	1	1	1	1	1	3	2	1	1	2	2	3	1	1	2	1	1	1	1	4	7	4	8	4	1	1	3	4	3	1	3	5
At4g39350	CESA2	Medium	Cellulose	1	1	1	1	1	3	2	1	1	1	1	0	1	0	1	1	0	1	1	1	2	1	2	0	1	1	2	0	4	0	2	0
At2g35620	FEI2	Medium	Cellulose	1	1	1	1	1	5	2	2	1	1	2	2	1	2	1	1	0	0	1	3	6	3	6	3	1	0	2	6	4	1	2	0
At3g46550	SOS5	Medium	Cellulose	1	1	1	1	1	3	2	1	1	2	0	2	1	1	2	1	1	1	1	1	2	1	2	2	1	1	4	2	4	1	2	3
At3g50990	PRX36	Medium	Extrusion	1	1	0	1	1	3	1	0	0	0	1	1	1	0	1	1	1	1	1	1	2	1	1	0	1	0	2	1	0	1	0	0
At2g22900	MUCI10	Medium	Hemicellulose	1	1	1	1	1	3	3	1	1	2	0	1	2	0	1	1	0	1	1	1	2	1	2	3	1	1	2	2	4	1	1	3
At1g74160	TRM4	Medium	Microtubule	2	2	2	2	2	8	2	4	2	3	1	4	3	4	3	2	1	3	2	2	6	3	7	3	2	2	4	5	10	2	3	3
At1g02720	GATL5	Medium	Pectin	1	1	0	1	1	4	0	1	1	0	0	1	1	1	1	1	0	1	1	1	2	1	2	1	1	0	2	1	0	0	0	0
At1g19900	RUBY	Medium	Pectin	1	1	1	1	1	3	6	1	1	1	0	3	1	2	1	1	2	1	1	4	11	6	0	4	1	1	2	3	4	1	2	3
At1g23200	HMS	Medium	Pectin	1	1	1	1	1	4	2	1	1	1	1	1	1	1	1	1	1	1	1	1	2	1	2	1	1	1	3	2	2	1	1	0
At1g27120	GALT4	Medium	Pectin	1	0	1	1	1	3	2	1	1	2	0	4	1	2	1	1	1	1	1	2	8	3	4	10	1	1	2	3	3	1	2	2
At2g47670	PMEI6	Medium	Pectin	1	1	1	1	1	3	2	1	1	2	2	2	1	0	1	1	1	1	1	2	2	2	4	3	1	1	2	2	1	1	2	1
At3g06440	GALT3	Medium	Pectin	1	1	1	1	1	3	2	1	1	1	1	1	1	1	1	1	0	1	1	1	1	1	2	1	1	1	2	2	2	1	1	2
At4g21060	GALT2	Medium	Pectin	1	1	1	1	1	5	2	1	1	1	1	1	1	1	1	1	1	1	1	1	2	0	2	1	1	1	3	1	5	1	1	1
At5g62620	GALT6	Medium	Pectin	1	1	1	1	1	4	2	1	1	2	1	1	2	3	2	1	1	1	1	1	4	2	2	3	1	2	2	1	4	1	2	3
At5g05820	UUAT3	Medium	Pectin	1	2	1	1	1	3	2	2	1	2	0	1	1	0	1	1	0	1	1	2	4	4	3	1	1	2	2	1	2	1	2	2
At5g11230	UAFT2	Medium	Pectin	1	2	1	1	1	3	2	1	1	3	1	2	1	2	1	1	1	1	1	2	4	2	4	4	1	1	2	2	4	1	2	1
At1g09540	MYB61	Medium	Regulation	1	1	1	1	1	3	2	1	1	2	0	3	1	0	1	1	1	1	1	3	6	3	6	3	1	1	2	4	1	1	3	2
At1g62990	KNAT7	Medium	Regulation	1	1	0	1	1	3	2	1	1	1	0	2	1	0	1	1	1	2	1	2	6	3	4	4	1	2	2	4	5	1	2	3
At4g09820	TT8	Medium	Regulation	1	1	1	1	1	5	2	1	1	2	1	2	1	2	1	1	1	0	1	1	3	2	2	1	1	1	2	2	4	2	1	5
At4g21030	DOF4.2	Medium	Regulation	4	3	2	4	3	10	4	8	4	3	4	12	3	4	6	14	2	2	3	10	23	13	16	7	3	5	7	14	21	2	3	2
At5g23260	ABS / TT16	Medium	Regulation	1	1	1	1	1	4	2	1	1	2	2	2	1	1	1	1	1	1	1	3	6	2	6	3	1	1	3	4	1	1	2	2
At5g35550	TT2	Medium	Regulation	1	1	1	1	1	4	1	1	1	1	0	1	1	2	1	1	1	1	1	1	2	1	3	1	1	1	2	1	2	1	2	2
At1g74450	ROH1D	Medium	Unknow	2	2	2	2	2	7	3	2	2	5	0	3	2	1	2	2	2	2	2	3	7	4	5	3	2	2	4	4	10	2	4	2
At2g21770	CESA9	Low	Cellulose	1	1	1	0	0	0	0	0	0	0	0	0	0	0	0	0	0	1	0	0	0	0	0	0	0	0	0	0	0	1	1	1
At2g41770	STL1	Low	Cellulose	1	3	1	1	1	4	2	1	1	2	2	2	1	1	1	1	1	1	1	2	4	2	4	2	1	1	2	3	4	1	2	2
At3g57420	STL2	Low	Cellulose	1	1	1	1	1	4	2	3	1	0	0	0	0	1	1	1	1	0	1	0	0	0	0	0	1	1	2	0	3	1	1	1
At3g55940	PLC7	Low	Cellulose	1	1	0	2	1	3	2	1	1	1	1	2	2	4	2	1	1	2	1	2	5	2	4	5	1	1	4	4	9	2	1	1
At5g58690	PLC5	Low	Cellulose	1	1	1	1	1	3	2	1	1	1	1	1	1	1	1	1	0	1	1	4	6	3	4	6	1	1	2	2	3	1	2	2
At3g05120	GID1A	Low	Hormone	1	1	1	1	1	3	2	1	1	2	1	2	1	1	1	1	1	1	1	1	2	1	2	1	1	1	2	3	2	1	1	1
At3g63010	GID1B	Low	Hormone	1	1	1	1	1	3	2	2	2	3	3	2	1	0	1	1	1	1	1	2	6	3	6	4	1	1	2	5	3	2	2	1
At4g02780	GA1	Low	Hormone	1	1	1	1	1	6	2	1	1	1	0	4	1	2	2	1	1	1	1	2	5	1	4	2	1	1	3	2	3	1	1	4
At1g56100	PMEI14	Low	Pectin	8	4	4	3	3	12	2	6	3	2	0	3	2	1	1	2	1	1	6	1	2	1	1	1	2	1	4	0	7	1	3	2
At5g49180	PME58	Low	Pectin	1	1	1	1	1	3	1	1	1	1	0	3	1	2	1	1	0	0	1	1	2	1	3	1	1	0	2	1	3	1	1	0
At3g56310	AGAL3	Low	Unknow	1	1	1	1	1	5	2	1	1	1	1	1	1	2	1	1	1	1	1	2	4	2	3	1	1	1	2	1	2	1	1	1
At5g08370	AGAL2	Low	Unknow	1	1	0	1	1	5	2	3	1	2	3	4	1	0	1	1	1	3	1	2	4	1	0	3	1	1	2	5	4	1	1	1
At1g17950	MYB52	Low	Regulation	1	1	1	1	1	3	2	1	1	1	0	3	1	0	1	1	1	1	1	2	6	2	4	2	1	1	2	2	3	1	2	2
At1g23420	INO	Low	Regulation	1	1	1	1	1	3	2	1	1	2	1	2	1	0	1	1	1	1	1	2	4	2	4	2	1	1	2	2	3	1	2	1
At1g32240	KAN2	Low	Regulation	1	1	2	1	1	3	2	2	1	2	0	4	1	2	2	1	1	2	1	3	7	3	3	2	1	1	2	3	2	1	2	2
At1g52880	NARS2 / NAM	Low	Regulation	1	1	0	1	1	4	1	1	1	1	0	2	1	3	1	1	1	2	1	1	2	1	0	1	1	1	2	2	3	1	1	1
At1g56650	MYB75	Low	Regulation	4	5	3	3	7	20	15	4	6	7	2	4	5	1	3	1	1	3	2	3	8	4	7	6	1	3	15	12	6	4	6	2
At1g63650	EGL3	Low	Regulation	1	1	1	1	1	3	2	1	1	1	0	3	1	2	1	1	0	1	1	2	5	2	2	3	1	1	2	3	8	1	2	2
At3g58780	SHP1	Low	Regulation	1	1	2	1	1	3	2	4	1	2	3	2	1	1	2	1	0	2	1	3	9	3	5	3	1	1	3	7	3	1	1	1
At2g42830	SHP2	Low	Regulation	1	1	1	1	1	3	2	2	1	2	0	1	2	0	4	1	0	0	1	1	4	1	1	4	1	2	2	2	6	1	3	1
At3g15510	NARS1	Low	Regulation	1	1	1	1	1	3	2	1	1	1	3	3	1	2	1	1	1	0	1	3	6	3	5	3	1	1	2	3	2	1	2	1
At3g54720	AMP1	Low	Regulation	1	1	1	1	1	3	2	2	1	1	3	3	1	2	3	1	1	1	2	2	4	3	4	3	1	1	3	6	3	1	1	2
At4g11180	DIR12 / DP1	Low	Regulation	3	2	2	2	2	10	3	3	3	3	2	4	1	1	0	2	0	0	3	3	3	2	6	3	1	4	5	2	14	3	3	2
At5g16560	KAN1	Low	Regulation	1	1	1	1	1	3	2	1	1	3	2	4	1	0	1	1	1	1	1	3	7	3	5	3	1	1	2	4	3	1	2	2
At5g42630	ATS / KAN4	Low	Regulation	1	1	1	1	1	4	2	1	1	2	0	1	1	2	2	1	1	1	1	1	3	1	2	1	1	1	2	2	4	1	1	2
At5g60690	REV	Low	Regulation	1	1	1	1	1	5	2	2	1	2	0	3	1	2	1	1	1	1	1	2	8	6	4	3	1	1	4	2	3	1	2	6
At5g65410	HB25 / ZFHD2	Low	Regulation	1	1	0	1	1	3	2	1	1	3	3	3	1	0	1	1	1	1	1	3	5	3	6	2	1	1	2	4	3	1	2	1
At4g34210; At4g34470	SK11; SK12	Low	Regulation	9	7	4	9	5	23	10	8	8	2	4	11	9	6	6	13	4	5	6	9	22	9	14	9	22	11	15	14	5	16	2	3
At2g23760	BLH4	Low	Regulation	1	1	1	1	1	3	2	1	1	1	1	4	1	1	2	1	0	1	1	2	4	2	5	5	1	1	2	4	5	1	1	4
At4g36870	BLH2	Low	Regulation	1	1	1	1	1	4	2	1	1	1	1	2	1	0	1	1	0	2	1	2	4	2	4	2	1	1	2	3	3	1	2	2
At2g18840	YIP4A	Low	Secretion	1	1	1	1	1	4	2	1	1	0	0	0	1	0	2	0	0	2	1	0	0	0	0	0	1	0	2	0	8	1	2	3
At4g30260	YIP4B	Low	Secretion	1	1	1	1	1	3	2	1	1	3	2	3	1	2	1	1	1	0	1	4	8	8	6	3	1	2	2	4	5	1	2	1
At5g15180	PRX56	Low	Unknow	1	2	2	2	2	3	2	1	1	0	1	2	1	0	1	1	0	1	2	2	4	2	4	2	1	1	4	3	3	1	2	2
At1g62000; At1g62060; At1g62080	TBA1; TBA2; TBA3	Low	Unknow	5	5	3	7	2	17	3	1	1	4	0	3	8	6	5	2	3	0	1	5	9	4	4	1	2	2	13	10	0	6	0	0

## Sheet: Table S6 Columella
Table S6: Sorting of the studied species according to the columella occurrence highlights the absence of correlation with the presence of any A. thaliana MSC tool box gene orthologs. Columella presence (Yes) or it absence (No) are based on the results in Figs. 3-5. Top genes are the most directly implicated genes in synthesis of cellulose microfibrils linked to the columella in A. thaliana (Table…
			Myxospermy	Yes	Yes	Yes	Yes	Yes	Yes	No	Yes	Yes	Yes	Yes	No	No	No	No	Yes	Yes	No	Yes	Yes	Yes	No	Yes	No	Yes	Yes	NA	NA	NA	NA	NA	NA
			PCW Rupture Zone	Radial	Radial	Radial	Intermediate	Intermediate	Central	No	Central	Central	unicel	unicel	No	No	No	No	Central	Central	No	Central	?	Central	No	Central	No	Central	No	NA	NA	NA	NA	NA	NA
			Columella	Yes	Yes	Yes	Yes	Yes	Yes	Yes	Yes	?	No	No	No	No	No	No	No	No	No	No	No	No	No	No	No	No	No	NA	NA	NA	NA	NA	NA
			Lineage	1	1	1	1	1	1	1	1	1	1	1	2	2	2	2	2	2	2	2	2	2	2	2	2	4	Basal	1	2	2	3	Clade C
			Tribe	Camelineae	Camelineae	Camelineae	Camelineae	Camelineae	Camelineae		Cardamineae		Cardamineae	Cardamineae	Brassiceae	Brassiceae	Brassiceae	Brassiceae	Brassiceae	Brassiceae	Brassiceae									Camelineae	Brassiceae			Biscutelleae
			Species name	Arabidopsis thaliana	Arabidopsis lyrata	Arabidopsis halleri	Capsella rubella	Capsella grandiflora	Camelina sativa	Boechera stricta	Cardamine hirsuta	Lepidium sativum	Rorripa islandica	Leavenworthia alabamica	Brassica rapa	Brassica napus	Brassica oleraceae	Brassica juncea	Brassica nigra	Sinapis alba	Raphanus sativus	Sisymbrium irio	Stanleya pinnata	Schrenkiella parvula	Thaspi avense	Eutrema salsugineum	Noccae caerulescens	Arabis alpina	Aethionema arabicum	Capsella bursa-pastoris	Eruca vesicaria	Isatis tinctoria	Dipterocarpus strictus	Lunaria annua	Biscutella laevigata
AGI Code	Gene abreviation	Impact	Role	1	2	3	4	5	6	7	9	8	10	11	12	13	14	15	16	17	18	19	20	21	22	23	24	25	27	A	B	C	D	E	F
At5g09870	MUM3 / CESA5	High	Cellulose	1	1	1	1	1	4	1	1	2	1	2	1	2	1	2	1	2	1	1	1	1	1	1	1	1	0	2	1	2	1	2	1
At3g29810	COBL2	High	Cellulose	1	1	2	1	1	4	1	2	2	1	1	2	6	7	4	0	2	2	1	1	1	1	1	1	0	1	1	4	5	1	1	1
At2g35620	FEI2	Medium	Cellulose	1	1	1	1	1	5	1	2	2	1	1	3	6	3	6	2	2	3	1	2	1	1	1	0	0	0	2	6	4	1	2	0
At3g46550	SOS5	Medium	Cellulose	1	1	1	1	1	3	1	1	2	1	2	1	2	1	2	0	2	2	1	1	2	1	1	1	1	1	4	2	4	1	2	3
At5g23940	DCR	High	Cutin	1	1	1	1	1	3	1	1	2	1	2	2	4	2	4	0	2	2	1	0	1	1	1	1	1	1	2	3	3	1	2	1
At5g67360	SBT1.7 / ARA12	High	Extrusion	1	1	1	1	1	3	1	2	2	1	1	2	4	3	3	1	1	2	2	2	1	1	1	1	0	1	2	2	2	1	2	1
At5g67030	ABA1	High	Hormone	1	1	1	1	1	3	1	5	2	1	2	2	5	2	4	2	2	4	1	0	1	1	1	1	1	2	2	5	7	1	1	2
At5g22740	CSLA2	High	Mannan	1	1	1	1	1	4	1	1	2	1	3	3	6	3	4	1	4	4	2	4	1	1	1	2	1	1	4	6	4	1	2	5
At1g18580	GAUT11	High	Pectin	1	1	1	1	1	4	1	1	2	1	3	3	7	3	5	0	4	3	1	1	2	1	1	1	1	1	2	4	4	1	1	2
At1g21070	URGT2	High	Pectin	1	1	1	1	1	3	1	1	2	1	2	2	4	3	3	0	1	1	1	1	1	1	1	1	1	1	2	1	3	1	2	2
At1g28240	MUCI70	High	Pectin	1	1	1	1	1	3	1	1	2	1	2	3	7	2	6	0	4	3	1	2	1	1	1	1	1	1	2	4	3	1	2	2
At1g53500	MUM4 / RHM2	High	Pectin	1	1	1	1	1	5	1	1	2	1	4	2	5	3	7	1	2	5	1	1	1	1	1	1	0	1	3	3	3	1	2	2
At1g63930	ROH1	High	Pectin	1	1	1	1	1	4	1	1	2	1	1	1	2	1	1	0	2	2	1	1	1	1	1	1	1	1	2	1	4	1	2	1
At2g20650	FLY2	High	Pectin	1	1	1	1	1	2	1	5	2	1	1	1	2	1	2	0	2	1	1	1	1	1	1	1	0	1	2	2	3	1	1	1
At4g28370	FLY1	High	Pectin	1	1	1	1	1	4	1	1	2	1	2	1	2	1	2	0	1	1	1	2	1	1	1	1	0	1	3	2	3	0	2	2
At3g09820	ADK1	High	Pectin	1	1	1	1	1	18	1	2	2	1	2	1	2	1	2	1	2	7	1	2	1	1	1	1	1	1	2	1	5	1	1	2
At3g10380	SEC8	High	Pectin	1	2	1	1	1	9	1	1	2	1	2	4	6	3	8	4	3	3	2	2	1	1	1	1	0	1	2	4	4	1	2	2
At3g51160	MUR1	High	Pectin	2	2	2	2	2	8	2	3	4	2	3	5	12	6	10	5	4	5	2	2	2	2	1	2	2	2	2	7	3	2	3	2
At5g63800	MUM2 / BGAL6	High	Pectin	1	1	0	1	1	3	1	1	2	1	2	2	5	2	4	2	2	6	1	1	1	1	1	1	1	1	2	3	3	1	1	4
At1g76880	DF1	High	Regulation	1	1	1	1	1	4	1	1	2	1	2	3	6	3	5	1	3	5	2	0	1	1	1	2	1	1	2	6	1	1	2	2
At1g79840	GL2	High	Regulation	1	0	1	1	1	4	1	2	2	1	1	1	2	1	1	1	1	1	1	3	2	1	1	1	1	1	2	1	1	1	1	3
At1g80330	GA3OX4	High	Regulation	1	1	1	1	1	1	1	1	1	1	2	1	2	1	2	0	1	1	1	1	1	1	1	4	0	1	2	3	1	1	1	2
At2g32700	LUH / MUM1	High	Regulation	1	1	1	1	1	4	1	3	2	1	3	4	10	6	7	3	3	8	1	2	1	1	1	1	0	2	2	3	7	1	2	3
At2g37260	TTG2 / DSL1	High	Regulation	1	1	1	1	1	4	1	3	2	1	1	2	5	2	5	2	2	2	1	1	1	1	1	1	0	1	2	2	4	1	1	2
At3g08850	RAPTOR1B	High	Regulation	1	1	1	1	1	3	1	1	2	1	4	1	4	3	4	4	3	3	1	2	1	1	1	1	1	1	2	3	2	1	1	2
At3g13540	MYB5	High	Regulation	1	1	1	1	1	3	1	1	2	1	1	2	4	2	6	4	1	2	1	2	1	1	1	1	1	1	2	3	5	1	2	1
At4g09960	STK	High	Regulation	1	1	1	1	1	3	1	2	2	1	1	2	4	3	3	1	1	2	2	2	1	1	1	1	0	1	2	2	2	1	2	1
At4g32551	LUG	High	Regulation	1	1	1	1	1	3	1	1	2	1	3	3	7	3	6	1	3	2	1	3	1	1	1	1	3	1	2	6	4	1	2	2
At4g36920	AP2	High	Regulation	1	1	1	1	1	4	1	1	2	1	3	2	5	2	3	1	2	2	1	0	1	1	1	1	1	1	2	3	4	1	2	2
At5g24520	TTG1	High	Regulation	1	1	1	1	1	8	1	2	2	1	2	3	4	2	2	0	1	1	1	1	1	1	1	1	1	1	1	3	4	1	1	1
At5g40330	MYB23	High	Regulation	1	1	1	1	1	3	1	1	2	1	0	1	1	1	2	1	2	1	0	2	2	1	1	1	1	1	2	1	5	1	1	3
At5g63840	RSW3	High	Regulation	1	1	0	1	1	4	1	1	2	1	2	2	8	2	4	2	1	6	1	1	1	1	1	1	1	1	2	1	3	1	2	7
At5g66730	ENY / IDD1	High	Regulation	1	1	1	1	1	4	1	1	2	1	1	2	3	2	4	2	2	2	1	0	1	1	1	1	1	1	2	2	3	1	2	2
At1g24260	SEP3	High	Regulation	1	1	1	1	1	4	1	3	2	1	2	3	7	4	7	0	5	2	1	0	1	1	1	1	1	1	2	4	2	1	2	3
At1g09330	ECH	High	Secretion	1	1	1	1	1	3	2	1	2	1	3	3	5	3	4	0	3	3	1	3	1	2	1	1	1	2	2	5	2	1	2	3
At1g60780	AP1M2	High	Secretion	1	1	0	1	1	3	1	1	2	1	1	2	5	3	3	0	2	2	1	1	2	1	1	1	1	1	2	2	5	1	2	2
At2g35630	MOR1	High	Secretion	2	2	2	2	2	4	2	3	5	2	1	3	10	2	1	3	2	4	1	2	1	1	1	1	1	6	5	4	2	1	2	3
At5g03540	EXO70A1	High	Secretion	1	1	1	1	1	5	1	2	2	1	2	2	5	2	3	1	3	2	1	0	2	2	1	1	1	1	2	4	3	1	2	2
At2g27600	SKD1	High	Unknow	1	1	1	1	1	7	1	1	2	1	3	2	4	3	4	2	3	2	1	2	1	1	1	1	0	0	2	3	3	0	2	3
At2g28110	IRX7	High	Xylan	1	1	1	1	1	3	1	1	2	1	1	2	5	2	4	3	2	2	1	2	1	1	1	1	1	1	2	5	4	1	1	1
At3g10320	MUCI21 / MUM5	High	Xylan	1	1	1	1	1	3	1	1	2	1	1	1	2	1	1	1	1	1	1	2	1	1	1	1	1	1	2	1	2	1	2	2
At4g36890	IRX14	High	Xylan	1	1	1	1	1	3	1	2	2	1	2	1	4	2	2	1	1	1	1	2	1	1	1	1	1	1	2	2	2	1	2	1
At5g49360	BXL1	High	Xylan	1	1	1	1	1	3	1	1	2	1	2	4	7	4	8	2	3	4	1	1	2	1	1	1	1	1	3	4	3	1	3	5
At4g39350	CESA2	Medium	Cellulose	1	1	1	1	1	3	1	1	2	1	1	1	2	1	2	1	0	0	1	0	1	1	1	1	0	1	2	0	4	0	2	0
At3g50990	PRX36	Medium	Extrusion	1	1	0	1	1	3	1	0	1	0	0	1	2	1	1	1	1	0	1	0	1	1	1	0	1	1	2	1	0	1	0	0
At2g22900	MUCI10	Medium	Hemicellulose	1	1	1	1	1	3	1	1	3	1	2	1	2	1	2	0	1	3	2	0	1	1	1	1	0	1	2	2	4	1	1	3
At1g74160	TRM4	Medium	Microtubule	2	2	2	2	2	8	2	4	2	2	3	2	6	3	7	1	4	3	3	4	3	2	2	2	1	3	4	5	10	2	3	3
At1g02720	GATL5	Medium	Pectin	1	1	0	1	1	4	1	1	0	1	0	1	2	1	2	0	1	1	1	1	1	1	1	0	0	1	2	1	0	0	0	0
At1g19900	RUBY	Medium	Pectin	1	1	1	1	1	3	1	1	6	1	1	4	11	6	0	0	3	4	1	2	1	1	1	1	2	1	2	3	4	1	2	3
At1g23200	HMS	Medium	Pectin	1	1	1	1	1	4	1	1	2	1	1	1	2	1	2	1	1	1	1	1	1	1	1	1	1	1	3	2	2	1	1	0
At1g27120	GALT4	Medium	Pectin	1	0	1	1	1	3	1	1	2	1	2	2	8	3	4	0	4	10	1	2	1	1	1	1	1	1	2	3	3	1	2	2
At1g74800	GALT5	Medium	Pectin	1	1	1	1	1	4	1	1	2	1	2	2	5	2	4	1	2	7	1	2	2	1	1	1	1	2	2	4	3	1	1	4
At2g18280	TPL2	Medium	Pectin	1	1	0	1	1	3	1	1	2	1	2	1	2	1	2	0	1	1	1	1	2	1	1	1	0	3	2	2	4	1	3	3
At2g47670	PMEI6	Medium	Pectin	1	1	1	1	1	3	1	1	2	1	2	2	2	2	4	2	2	3	1	0	1	1	1	1	1	1	2	2	1	1	2	1
At3g06440	GALT3	Medium	Pectin	1	1	1	1	1	3	1	1	2	1	1	1	1	1	2	1	1	1	1	1	1	1	1	1	0	1	2	2	2	1	1	2
At4g21060	GALT2	Medium	Pectin	1	1	1	1	1	5	1	1	2	1	1	1	2	0	2	1	1	1	1	1	1	1	1	1	1	1	3	1	5	1	1	1
At5g04160	UUAT1	Medium	Pectin	1	1	1	1	1	3	1	2	2	1	2	2	4	2	5	2	2	1	1	1	1	1	1	1	1	2	2	3	2	1	1	2
At5g15740	RRT1	Medium	Pectin	1	1	1	1	1	3	1	1	2	1	2	2	6	3	4	1	2	3	1	4	1	1	1	1	1	1	2	3	2	1	1	1
At5g62620	GALT6	Medium	Pectin	1	1	1	1	1	4	1	1	2	1	2	1	4	2	2	1	1	3	2	3	2	1	1	2	1	1	2	1	4	1	2	3
At5g05820	UUAT3	Medium	Pectin	1	2	1	1	1	3	1	2	2	1	2	2	4	4	3	0	1	1	1	0	1	1	1	2	0	1	2	1	2	1	2	2
At5g11230	UAFT2	Medium	Pectin	1	2	1	1	1	3	1	1	2	1	3	2	4	2	4	1	2	4	1	2	1	1	1	1	1	1	2	2	4	1	2	1
At1g09540	MYB61	Medium	Regulation	1	1	1	1	1	3	1	1	2	1	2	3	6	3	6	0	3	3	1	0	1	1	1	1	1	1	2	4	1	1	3	2
At1g62990	KNAT7	Medium	Regulation	1	1	0	1	1	3	1	1	2	1	1	2	6	3	4	0	2	4	1	0	1	1	1	2	1	2	2	4	5	1	2	3
At4g09820	TT8	Medium	Regulation	1	1	1	1	1	5	1	1	2	1	2	1	3	2	2	1	2	1	1	2	1	1	1	1	1	0	2	2	4	2	1	5
At4g21030	DOF4.2	Medium	Regulation	4	3	2	4	3	10	3	8	4	4	3	10	23	13	16	4	12	7	3	4	6	3	14	5	2	2	7	14	21	2	3	2
At5g23260	ABS / TT16	Medium	Regulation	1	1	1	1	1	4	1	1	2	1	2	3	6	2	6	2	2	3	1	1	1	1	1	1	1	1	3	4	1	1	2	2
At5g35550	TT2	Medium	Regulation	1	1	1	1	1	4	1	1	1	1	1	1	2	1	3	0	1	1	1	2	1	1	1	1	1	1	2	1	2	1	2	2
At1g74450	ROH1D	Medium	Unknow	2	2	2	2	2	7	2	2	3	2	5	3	7	4	5	0	3	3	2	1	2	2	2	2	2	2	4	4	10	2	4	2
At2g21770	CESA9	Low	Cellulose	1	1	1	0	0	0	0	0	0	0	0	0	0	0	0	0	0	0	0	0	0	0	0	0	0	1	0	0	0	1	1	1
At2g41770	STL1	Low	Cellulose	1	3	1	1	1	4	1	1	2	1	2	2	4	2	4	2	2	2	1	1	1	1	1	1	1	1	2	3	4	1	2	2
At3g57420	STL2	Low	Cellulose	1	1	1	1	1	4	1	3	2	1	0	0	0	0	0	0	0	0	0	1	1	1	1	1	1	0	2	0	3	1	1	1
At3g55940	PLC7	Low	Cellulose	1	1	0	2	1	3	1	1	2	1	1	2	5	2	4	1	2	5	2	4	2	1	1	1	1	2	4	4	9	2	1	1
At5g58690	PLC5	Low	Cellulose	1	1	1	1	1	3	1	1	2	1	1	4	6	3	4	1	1	6	1	1	1	1	1	1	0	1	2	2	3	1	2	2
At3g05120	GID1A	Low	Hormone	1	1	1	1	1	3	1	1	2	1	2	1	2	1	2	1	2	1	1	1	1	1	1	1	1	1	2	3	2	1	1	1
At3g63010	GID1B	Low	Hormone	1	1	1	1	1	3	1	2	2	2	3	2	6	3	6	3	2	4	1	0	1	1	1	1	1	1	2	5	3	2	2	1
At4g02780	GA1	Low	Hormone	1	1	1	1	1	6	1	1	2	1	1	2	5	1	4	0	4	2	1	2	2	1	1	1	1	1	3	2	3	1	1	4
At1g56100	PMEI14	Low	Pectin	8	4	4	3	3	12	6	6	2	3	2	1	2	1	1	0	3	1	2	1	1	2	2	1	1	1	4	0	7	1	3	2
At5g49180	PME58	Low	Pectin	1	1	1	1	1	3	1	1	1	1	1	1	2	1	3	0	3	1	1	2	1	1	1	0	0	0	2	1	3	1	1	0
At3g56310	AGAL3	Low	Unknow	1	1	1	1	1	5	1	1	2	1	1	2	4	2	3	1	1	1	1	2	1	1	1	1	1	1	2	1	2	1	1	1
At5g08370	AGAL2	Low	Unknow	1	1	0	1	1	5	1	3	2	1	2	2	4	1	0	3	4	3	1	0	1	1	1	1	1	3	2	5	4	1	1	1
At1g17950	MYB52	Low	Regulation	1	1	1	1	1	3	1	1	2	1	1	2	6	2	4	0	3	2	1	0	1	1	1	1	1	1	2	2	3	1	2	2
At1g23420	INO	Low	Regulation	1	1	1	1	1	3	1	1	2	1	2	2	4	2	4	1	2	2	1	0	1	1	1	1	1	1	2	2	3	1	2	1
At1g32240	KAN2	Low	Regulation	1	1	2	1	1	3	1	2	2	1	2	3	7	3	3	0	4	2	1	2	2	1	1	1	1	2	2	3	2	1	2	2
At1g52880	NARS2 / NAM	Low	Regulation	1	1	0	1	1	4	1	1	1	1	1	1	2	1	0	0	2	1	1	3	1	1	1	1	1	2	2	2	3	1	1	1
At1g56650	MYB75	Low	Regulation	4	5	3	3	7	20	2	4	15	6	7	3	8	4	7	2	4	6	5	1	3	1	1	3	1	3	15	12	6	4	6	2
At1g63650	EGL3	Low	Regulation	1	1	1	1	1	3	1	1	2	1	1	2	5	2	2	0	3	3	1	2	1	1	1	1	0	1	2	3	8	1	2	2
At3g58780	SHP1	Low	Regulation	1	1	2	1	1	3	1	4	2	1	2	3	9	3	5	3	2	3	1	1	2	1	1	1	0	2	3	7	3	1	1	1
At2g42830	SHP2	Low	Regulation	1	1	1	1	1	3	1	2	2	1	2	1	4	1	1	0	1	4	2	0	4	1	1	2	0	0	2	2	6	1	3	1
At3g15510	NARS1	Low	Regulation	1	1	1	1	1	3	1	1	2	1	1	3	6	3	5	3	3	3	1	2	1	1	1	1	1	0	2	3	2	1	2	1
At3g54720	AMP1	Low	Regulation	1	1	1	1	1	3	2	2	2	1	1	2	4	3	4	3	3	3	1	2	3	1	1	1	1	1	3	6	3	1	1	2
At4g11180	DIR12 / DP1	Low	Regulation	3	2	2	2	2	10	3	3	3	3	3	3	3	2	6	2	4	3	1	1	0	1	2	4	0	0	5	2	14	3	3	2
At5g16560	KAN1	Low	Regulation	1	1	1	1	1	3	1	1	2	1	3	3	7	3	5	2	4	3	1	0	1	1	1	1	1	1	2	4	3	1	2	2
At5g42630	ATS / KAN4	Low	Regulation	1	1	1	1	1	4	1	1	2	1	2	1	3	1	2	0	1	1	1	2	2	1	1	1	1	1	2	2	4	1	1	2
At5g60690	REV	Low	Regulation	1	1	1	1	1	5	1	2	2	1	2	2	8	6	4	0	3	3	1	2	1	1	1	1	1	1	4	2	3	1	2	6
At5g65410	HB25 / ZFHD2	Low	Regulation	1	1	0	1	1	3	1	1	2	1	3	3	5	3	6	3	3	2	1	0	1	1	1	1	1	1	2	4	3	1	2	1
At4g34210; At4g34470	SK11; SK12	Low	Regulation	9	7	4	9	5	23	6	8	10	8	2	9	22	9	14	4	11	9	9	6	6	22	13	11	4	5	15	14	5	16	2	3
At2g23760	BLH4	Low	Regulation	1	1	1	1	1	3	1	1	2	1	1	2	4	2	5	1	4	5	1	1	2	1	1	1	0	1	2	4	5	1	1	4
At4g36870	BLH2	Low	Regulation	1	1	1	1	1	4	1	1	2	1	1	2	4	2	4	1	2	2	1	0	1	1	1	1	0	2	2	3	3	1	2	2
At2g18840	YIP4A	Low	Secretion	1	1	1	1	1	4	1	1	2	1	0	0	0	0	0	0	0	0	1	0	2	1	0	0	0	2	2	0	8	1	2	3
At4g30260	YIP4B	Low	Secretion	1	1	1	1	1	3	1	1	2	1	3	4	8	8	6	2	3	3	1	2	1	1	1	2	1	0	2	4	5	1	2	1
At5g15180	PRX56	Low	Unknow	1	2	2	2	2	3	2	1	2	1	0	2	4	2	4	1	2	2	1	0	1	1	1	1	0	1	4	3	3	1	2	2
At1g62000; At1g62060; At1g62080	TBA1; TBA2; TBA3	Low	Unknow	5	5	3	7	2	17	1	1	3	1	4	5	9	4	4	0	3	1	8	6	5	2	2	2	3	0	13	10	0	6	0	0

## Sheet: Table S7 Rupture zone
Table S7: Sorting of the studied species according to their opening zone of the primary cell wall that allows the mucilage extrusion highlights the absence of correlation with orthologs from the genes controlling the opening mode in A. thaliana. The MSC opening mode can be radial (Rad), central (Mid), or absent (No). This cellular phenotype is based on results in Fig. 3-5. Top genes are the most …
			Myxospermy	Yes	Yes	Yes	Yes	Yes	Yes	Yes	Yes	Yes	Yes	Yes	Yes	Yes	Yes	Yes	Yes	Yes	No	No	No	No	No	No	No	No	Yes	NA	NA	NA	NA	NA	NA
			PCW Rupture Zone	Radial	Radial	Radial	Intermediate	Intermediate	Central	Central	Central	Central	Central	Central	Central	Central	Central	unicel	unicel	?	No	No	No	No	No	No	No	No	No	NA	NA	NA	NA	NA	NA
			Columella	Yes	Yes	Yes	Yes	Yes	Yes	?	Yes	No	No	No	No	No	No	No	No	No	Yes	No	No	No	No	No	No	No	No	NA	NA	NA	NA	NA	NA
			Lineage	1	1	1	1	1	1	1	1	2	2	2	2	2	4	1	1	2	1	2	2	2	2	2	2	2	Basal	1	2	2	3	Clade C	Clade C
			Tribe	Camelineae	Camelineae	Camelineae	Camelineae	Camelineae	Camelineae		Cardamineae	Brassiceae	Brassiceae					Cardamineae	Cardamineae			Brassiceae	Brassiceae	Brassiceae	Brassiceae	Brassiceae				Camelineae	Brassiceae			Biscutelleae	Biscutelleae
			Species name	Arabidopsis thaliana	Arabidopsis lyrata	Arabidopsis halleri	Capsella rubella	Capsella grandiflora	Camelina sativa	Lepidium sativum	Cardamine hirsuta	Brassica nigra	Sinapis alba	Sisymbrium irio	Schrenkiella parvula	Eutrema salsugineum	Arabis alpina	Rorripa islandica	Leavenworthia alabamica	Stanleya pinnata	Boechera stricta	Brassica rapa	Brassica napus	Brassica oleraceae	Brassica juncea	Raphanus sativus	Thaspi avense	Noccae caerulescens	Aethionema arabicum	Capsella bursa-pastoris	Eruca vesicaria	Isatis tinctoria	Dipterocarpus strictus	Lunaria annua	Biscutella laevigata
AGI Code	Gene abreviation	Impact	Role	1	2	3	4	5	6	8	9	16	17	19	21	23	25	10	11	20	7	12	13	14	15	18	22	24	27	A	B	C	D	E	F
At2g47670	PMEI6	Medium	Pectin	1	1	1	1	1	3	2	1	2	2	1	1	1	1	1	2	0	1	2	2	2	4	3	1	1	1	2	2	1	1	2	1
At3g50990	PRX36	Medium	Extrusion	1	1	0	1	1	3	1	0	1	1	1	1	1	1	0	0	0	1	1	2	1	1	0	1	0	1	2	1	0	1	0	0
At5g67360	SBT1.7 / ARA12	High	Extrusion	1	1	1	1	1	3	2	2	1	1	2	1	1	0	1	1	2	1	2	4	3	3	2	1	1	1	2	2	2	1	2	1
At5g09870	MUM3 / CESA5	High	Cellulose	1	1	1	1	1	4	2	1	1	2	1	1	1	1	1	2	1	1	1	2	1	2	1	1	1	0	2	1	2	1	2	1
At3g29810	COBL2	High	Cellulose	1	1	2	1	1	4	2	2	0	2	1	1	1	0	1	1	1	1	2	6	7	4	2	1	1	1	1	4	5	1	1	1
At5g23940	DCR	High	Cutin	1	1	1	1	1	3	2	1	0	2	1	1	1	1	1	2	0	1	2	4	2	4	2	1	1	1	2	3	3	1	2	1
At5g67030	ABA1	High	Hormone	1	1	1	1	1	3	2	5	2	2	1	1	1	1	1	2	0	1	2	5	2	4	4	1	1	2	2	5	7	1	1	2
At5g22740	CSLA2	High	Mannan	1	1	1	1	1	4	2	1	1	4	2	1	1	1	1	3	4	1	3	6	3	4	4	1	2	1	4	6	4	1	2	5
At1g18580	GAUT11	High	Pectin	1	1	1	1	1	4	2	1	0	4	1	2	1	1	1	3	1	1	3	7	3	5	3	1	1	1	2	4	4	1	1	2
At1g21070	URGT2	High	Pectin	1	1	1	1	1	3	2	1	0	1	1	1	1	1	1	2	1	1	2	4	3	3	1	1	1	1	2	1	3	1	2	2
At1g28240	MUCI70	High	Pectin	1	1	1	1	1	3	2	1	0	4	1	1	1	1	1	2	2	1	3	7	2	6	3	1	1	1	2	4	3	1	2	2
At1g53500	MUM4 / RHM2	High	Pectin	1	1	1	1	1	5	2	1	1	2	1	1	1	0	1	4	1	1	2	5	3	7	5	1	1	1	3	3	3	1	2	2
At1g63930	ROH1	High	Pectin	1	1	1	1	1	4	2	1	0	2	1	1	1	1	1	1	1	1	1	2	1	1	2	1	1	1	2	1	4	1	2	1
At2g20650	FLY2	High	Pectin	1	1	1	1	1	2	2	5	0	2	1	1	1	0	1	1	1	1	1	2	1	2	1	1	1	1	2	2	3	1	1	1
At4g28370	FLY1	High	Pectin	1	1	1	1	1	4	2	1	0	1	1	1	1	0	1	2	2	1	1	2	1	2	1	1	1	1	3	2	3	0	2	2
At3g09820	ADK1	High	Pectin	1	1	1	1	1	18	2	2	1	2	1	1	1	1	1	2	2	1	1	2	1	2	7	1	1	1	2	1	5	1	1	2
At3g10380	SEC8	High	Pectin	1	2	1	1	1	9	2	1	4	3	2	1	1	0	1	2	2	1	4	6	3	8	3	1	1	1	2	4	4	1	2	2
At3g51160	MUR1	High	Pectin	2	2	2	2	2	8	4	3	5	4	2	2	1	2	2	3	2	2	5	12	6	10	5	2	2	2	2	7	3	2	3	2
At5g63800	MUM2 / BGAL6	High	Pectin	1	1	0	1	1	3	2	1	2	2	1	1	1	1	1	2	1	1	2	5	2	4	6	1	1	1	2	3	3	1	1	4
At1g76880	DF1	High	Regulation	1	1	1	1	1	4	2	1	1	3	2	1	1	1	1	2	0	1	3	6	3	5	5	1	2	1	2	6	1	1	2	2
At1g79840	GL2	High	Regulation	1	0	1	1	1	4	2	2	1	1	1	2	1	1	1	1	3	1	1	2	1	1	1	1	1	1	2	1	1	1	1	3
At1g80330	GA3OX4	High	Regulation	1	1	1	1	1	1	1	1	0	1	1	1	1	0	1	2	1	1	1	2	1	2	1	1	4	1	2	3	1	1	1	2
At2g32700	LUH / MUM1	High	Regulation	1	1	1	1	1	4	2	3	3	3	1	1	1	0	1	3	2	1	4	10	6	7	8	1	1	2	2	3	7	1	2	3
At2g37260	TTG2 / DSL1	High	Regulation	1	1	1	1	1	4	2	3	2	2	1	1	1	0	1	1	1	1	2	5	2	5	2	1	1	1	2	2	4	1	1	2
At3g08850	RAPTOR1B	High	Regulation	1	1	1	1	1	3	2	1	4	3	1	1	1	1	1	4	2	1	1	4	3	4	3	1	1	1	2	3	2	1	1	2
At3g13540	MYB5	High	Regulation	1	1	1	1	1	3	2	1	4	1	1	1	1	1	1	1	2	1	2	4	2	6	2	1	1	1	2	3	5	1	2	1
At4g09960	STK	High	Regulation	1	1	1	1	1	3	2	2	1	1	2	1	1	0	1	1	2	1	2	4	3	3	2	1	1	1	2	2	2	1	2	1
At4g32551	LUG	High	Regulation	1	1	1	1	1	3	2	1	1	3	1	1	1	3	1	3	3	1	3	7	3	6	2	1	1	1	2	6	4	1	2	2
At4g36920	AP2	High	Regulation	1	1	1	1	1	4	2	1	1	2	1	1	1	1	1	3	0	1	2	5	2	3	2	1	1	1	2	3	4	1	2	2
At5g24520	TTG1	High	Regulation	1	1	1	1	1	8	2	2	0	1	1	1	1	1	1	2	1	1	3	4	2	2	1	1	1	1	1	3	4	1	1	1
At5g40330	MYB23	High	Regulation	1	1	1	1	1	3	2	1	1	2	0	2	1	1	1	0	2	1	1	1	1	2	1	1	1	1	2	1	5	1	1	3
At5g63840	RSW3	High	Regulation	1	1	0	1	1	4	2	1	2	1	1	1	1	1	1	2	1	1	2	8	2	4	6	1	1	1	2	1	3	1	2	7
At5g66730	ENY / IDD1	High	Regulation	1	1	1	1	1	4	2	1	2	2	1	1	1	1	1	1	0	1	2	3	2	4	2	1	1	1	2	2	3	1	2	2
At1g24260	SEP3	High	Regulation	1	1	1	1	1	4	2	3	0	5	1	1	1	1	1	2	0	1	3	7	4	7	2	1	1	1	2	4	2	1	2	3
At1g09330	ECH	High	Secretion	1	1	1	1	1	3	2	1	0	3	1	1	1	1	1	3	3	2	3	5	3	4	3	2	1	2	2	5	2	1	2	3
At1g60780	AP1M2	High	Secretion	1	1	0	1	1	3	2	1	0	2	1	2	1	1	1	1	1	1	2	5	3	3	2	1	1	1	2	2	5	1	2	2
At2g35630	MOR1	High	Secretion	2	2	2	2	2	4	5	3	3	2	1	1	1	1	2	1	2	2	3	10	2	1	4	1	1	6	5	4	2	1	2	3
At5g03540	EXO70A1	High	Secretion	1	1	1	1	1	5	2	2	1	3	1	2	1	1	1	2	0	1	2	5	2	3	2	2	1	1	2	4	3	1	2	2
At2g27600	SKD1	High	Unknow	1	1	1	1	1	7	2	1	2	3	1	1	1	0	1	3	2	1	2	4	3	4	2	1	1	0	2	3	3	0	2	3
At2g28110	IRX7	High	Xylan	1	1	1	1	1	3	2	1	3	2	1	1	1	1	1	1	2	1	2	5	2	4	2	1	1	1	2	5	4	1	1	1
At3g10320	MUCI21 / MUM5	High	Xylan	1	1	1	1	1	3	2	1	1	1	1	1	1	1	1	1	2	1	1	2	1	1	1	1	1	1	2	1	2	1	2	2
At4g36890	IRX14	High	Xylan	1	1	1	1	1	3	2	2	1	1	1	1	1	1	1	2	2	1	1	4	2	2	1	1	1	1	2	2	2	1	2	1
At5g49360	BXL1	High	Xylan	1	1	1	1	1	3	2	1	2	3	1	2	1	1	1	2	1	1	4	7	4	8	4	1	1	1	3	4	3	1	3	5
At4g39350	CESA2	Medium	Cellulose	1	1	1	1	1	3	2	1	1	0	1	1	1	0	1	1	0	1	1	2	1	2	0	1	1	1	2	0	4	0	2	0
At2g35620	FEI2	Medium	Cellulose	1	1	1	1	1	5	2	2	2	2	1	1	1	0	1	1	2	1	3	6	3	6	3	1	0	0	2	6	4	1	2	0
At3g46550	SOS5	Medium	Cellulose	1	1	1	1	1	3	2	1	0	2	1	2	1	1	1	2	1	1	1	2	1	2	2	1	1	1	4	2	4	1	2	3
At2g22900	MUCI10	Medium	Hemicellulose	1	1	1	1	1	3	3	1	0	1	2	1	1	0	1	2	0	1	1	2	1	2	3	1	1	1	2	2	4	1	1	3
At1g74160	TRM4	Medium	Microtubule	2	2	2	2	2	8	2	4	1	4	3	3	2	1	2	3	4	2	2	6	3	7	3	2	2	3	4	5	10	2	3	3
At1g02720	GATL5	Medium	Pectin	1	1	0	1	1	4	0	1	0	1	1	1	1	0	1	0	1	1	1	2	1	2	1	1	0	1	2	1	0	0	0	0
At1g19900	RUBY	Medium	Pectin	1	1	1	1	1	3	6	1	0	3	1	1	1	2	1	1	2	1	4	11	6	0	4	1	1	1	2	3	4	1	2	3
At1g23200	HMS	Medium	Pectin	1	1	1	1	1	4	2	1	1	1	1	1	1	1	1	1	1	1	1	2	1	2	1	1	1	1	3	2	2	1	1	0
At1g27120	GALT4	Medium	Pectin	1	0	1	1	1	3	2	1	0	4	1	1	1	1	1	2	2	1	2	8	3	4	10	1	1	1	2	3	3	1	2	2
At1g74800	GALT5	Medium	Pectin	1	1	1	1	1	4	2	1	1	2	1	2	1	1	1	2	2	1	2	5	2	4	7	1	1	2	2	4	3	1	1	4
At2g18280	TPL2	Medium	Pectin	1	1	0	1	1	3	2	1	0	1	1	2	1	0	1	2	1	1	1	2	1	2	1	1	1	3	2	2	4	1	3	3
At3g06440	GALT3	Medium	Pectin	1	1	1	1	1	3	2	1	1	1	1	1	1	0	1	1	1	1	1	1	1	2	1	1	1	1	2	2	2	1	1	2
At4g21060	GALT2	Medium	Pectin	1	1	1	1	1	5	2	1	1	1	1	1	1	1	1	1	1	1	1	2	0	2	1	1	1	1	3	1	5	1	1	1
At5g04160	UUAT1	Medium	Pectin	1	1	1	1	1	3	2	2	2	2	1	1	1	1	1	2	1	1	2	4	2	5	1	1	1	2	2	3	2	1	1	2
At5g15740	RRT1	Medium	Pectin	1	1	1	1	1	3	2	1	1	2	1	1	1	1	1	2	4	1	2	6	3	4	3	1	1	1	2	3	2	1	1	1
At5g62620	GALT6	Medium	Pectin	1	1	1	1	1	4	2	1	1	1	2	2	1	1	1	2	3	1	1	4	2	2	3	1	2	1	2	1	4	1	2	3
At5g05820	UUAT3	Medium	Pectin	1	2	1	1	1	3	2	2	0	1	1	1	1	0	1	2	0	1	2	4	4	3	1	1	2	1	2	1	2	1	2	2
At5g11230	UAFT2	Medium	Pectin	1	2	1	1	1	3	2	1	1	2	1	1	1	1	1	3	2	1	2	4	2	4	4	1	1	1	2	2	4	1	2	1
At1g09540	MYB61	Medium	Regulation	1	1	1	1	1	3	2	1	0	3	1	1	1	1	1	2	0	1	3	6	3	6	3	1	1	1	2	4	1	1	3	2
At1g62990	KNAT7	Medium	Regulation	1	1	0	1	1	3	2	1	0	2	1	1	1	1	1	1	0	1	2	6	3	4	4	1	2	2	2	4	5	1	2	3
At4g09820	TT8	Medium	Regulation	1	1	1	1	1	5	2	1	1	2	1	1	1	1	1	2	2	1	1	3	2	2	1	1	1	0	2	2	4	2	1	5
At4g21030	DOF4.2	Medium	Regulation	4	3	2	4	3	10	4	8	4	12	3	6	14	2	4	3	4	3	10	23	13	16	7	3	5	2	7	14	21	2	3	2
At5g23260	ABS / TT16	Medium	Regulation	1	1	1	1	1	4	2	1	2	2	1	1	1	1	1	2	1	1	3	6	2	6	3	1	1	1	3	4	1	1	2	2
At5g35550	TT2	Medium	Regulation	1	1	1	1	1	4	1	1	0	1	1	1	1	1	1	1	2	1	1	2	1	3	1	1	1	1	2	1	2	1	2	2
At1g74450	ROH1D	Medium	Unknow	2	2	2	2	2	7	3	2	0	3	2	2	2	2	2	5	1	2	3	7	4	5	3	2	2	2	4	4	10	2	4	2
At2g21770	CESA9	Low	Cellulose	1	1	1	0	0	0	0	0	0	0	0	0	0	0	0	0	0	0	0	0	0	0	0	0	0	1	0	0	0	1	1	1
At2g41770	STL1	Low	Cellulose	1	3	1	1	1	4	2	1	2	2	1	1	1	1	1	2	1	1	2	4	2	4	2	1	1	1	2	3	4	1	2	2
At3g57420	STL2	Low	Cellulose	1	1	1	1	1	4	2	3	0	0	0	1	1	1	1	0	1	1	0	0	0	0	0	1	1	0	2	0	3	1	1	1
At3g55940	PLC7	Low	Cellulose	1	1	0	2	1	3	2	1	1	2	2	2	1	1	1	1	4	1	2	5	2	4	5	1	1	2	4	4	9	2	1	1
At5g58690	PLC5	Low	Cellulose	1	1	1	1	1	3	2	1	1	1	1	1	1	0	1	1	1	1	4	6	3	4	6	1	1	1	2	2	3	1	2	2
At3g05120	GID1A	Low	Hormone	1	1	1	1	1	3	2	1	1	2	1	1	1	1	1	2	1	1	1	2	1	2	1	1	1	1	2	3	2	1	1	1
At3g63010	GID1B	Low	Hormone	1	1	1	1	1	3	2	2	3	2	1	1	1	1	2	3	0	1	2	6	3	6	4	1	1	1	2	5	3	2	2	1
At4g02780	GA1	Low	Hormone	1	1	1	1	1	6	2	1	0	4	1	2	1	1	1	1	2	1	2	5	1	4	2	1	1	1	3	2	3	1	1	4
At1g56100	PMEI14	Low	Pectin	8	4	4	3	3	12	2	6	0	3	2	1	2	1	3	2	1	6	1	2	1	1	1	2	1	1	4	0	7	1	3	2
At5g49180	PME58	Low	Pectin	1	1	1	1	1	3	1	1	0	3	1	1	1	0	1	1	2	1	1	2	1	3	1	1	0	0	2	1	3	1	1	0
At3g56310	AGAL3	Low	Unknow	1	1	1	1	1	5	2	1	1	1	1	1	1	1	1	1	2	1	2	4	2	3	1	1	1	1	2	1	2	1	1	1
At5g08370	AGAL2	Low	Unknow	1	1	0	1	1	5	2	3	3	4	1	1	1	1	1	2	0	1	2	4	1	0	3	1	1	3	2	5	4	1	1	1
At1g17950	MYB52	Low	Regulation	1	1	1	1	1	3	2	1	0	3	1	1	1	1	1	1	0	1	2	6	2	4	2	1	1	1	2	2	3	1	2	2
At1g23420	INO	Low	Regulation	1	1	1	1	1	3	2	1	1	2	1	1	1	1	1	2	0	1	2	4	2	4	2	1	1	1	2	2	3	1	2	1
At1g32240	KAN2	Low	Regulation	1	1	2	1	1	3	2	2	0	4	1	2	1	1	1	2	2	1	3	7	3	3	2	1	1	2	2	3	2	1	2	2
At1g52880	NARS2 / NAM	Low	Regulation	1	1	0	1	1	4	1	1	0	2	1	1	1	1	1	1	3	1	1	2	1	0	1	1	1	2	2	2	3	1	1	1
At1g56650	MYB75	Low	Regulation	4	5	3	3	7	20	15	4	2	4	5	3	1	1	6	7	1	2	3	8	4	7	6	1	3	3	15	12	6	4	6	2
At1g63650	EGL3	Low	Regulation	1	1	1	1	1	3	2	1	0	3	1	1	1	0	1	1	2	1	2	5	2	2	3	1	1	1	2	3	8	1	2	2
At3g58780	SHP1	Low	Regulation	1	1	2	1	1	3	2	4	3	2	1	2	1	0	1	2	1	1	3	9	3	5	3	1	1	2	3	7	3	1	1	1
At2g42830	SHP2	Low	Regulation	1	1	1	1	1	3	2	2	0	1	2	4	1	0	1	2	0	1	1	4	1	1	4	1	2	0	2	2	6	1	3	1
At3g15510	NARS1	Low	Regulation	1	1	1	1	1	3	2	1	3	3	1	1	1	1	1	1	2	1	3	6	3	5	3	1	1	0	2	3	2	1	2	1
At3g54720	AMP1	Low	Regulation	1	1	1	1	1	3	2	2	3	3	1	3	1	1	1	1	2	2	2	4	3	4	3	1	1	1	3	6	3	1	1	2
At4g11180	DIR12 / DP1	Low	Regulation	3	2	2	2	2	10	3	3	2	4	1	0	2	0	3	3	1	3	3	3	2	6	3	1	4	0	5	2	14	3	3	2
At5g16560	KAN1	Low	Regulation	1	1	1	1	1	3	2	1	2	4	1	1	1	1	1	3	0	1	3	7	3	5	3	1	1	1	2	4	3	1	2	2
At5g42630	ATS / KAN4	Low	Regulation	1	1	1	1	1	4	2	1	0	1	1	2	1	1	1	2	2	1	1	3	1	2	1	1	1	1	2	2	4	1	1	2
At5g60690	REV	Low	Regulation	1	1	1	1	1	5	2	2	0	3	1	1	1	1	1	2	2	1	2	8	6	4	3	1	1	1	4	2	3	1	2	6
At5g65410	HB25 / ZFHD2	Low	Regulation	1	1	0	1	1	3	2	1	3	3	1	1	1	1	1	3	0	1	3	5	3	6	2	1	1	1	2	4	3	1	2	1
At4g34210; At4g34470	SK11; SK12	Low	Regulation	9	7	4	9	5	23	10	8	4	11	9	6	13	4	8	2	6	6	9	22	9	14	9	22	11	5	15	14	5	16	2	3
At2g23760	BLH4	Low	Regulation	1	1	1	1	1	3	2	1	1	4	1	2	1	0	1	1	1	1	2	4	2	5	5	1	1	1	2	4	5	1	1	4
At4g36870	BLH2	Low	Regulation	1	1	1	1	1	4	2	1	1	2	1	1	1	0	1	1	0	1	2	4	2	4	2	1	1	2	2	3	3	1	2	2
At2g18840	YIP4A	Low	Secretion	1	1	1	1	1	4	2	1	0	0	1	2	0	0	1	0	0	1	0	0	0	0	0	1	0	2	2	0	8	1	2	3
At4g30260	YIP4B	Low	Secretion	1	1	1	1	1	3	2	1	2	3	1	1	1	1	1	3	2	1	4	8	8	6	3	1	2	0	2	4	5	1	2	1
At5g15180	PRX56	Low	Unknow	1	2	2	2	2	3	2	1	1	2	1	1	1	0	1	0	0	2	2	4	2	4	2	1	1	1	4	3	3	1	2	2
At1g62000; At1g62060; At1g62080	TBA1; TBA2; TBA3	Low	Unknow	5	5	3	7	2	17	3	1	0	3	8	5	2	3	1	4	6	1	5	9	4	4	1	2	2	0	13	10	0	6	0	0

## Sheet: Table S8 Roles
Table S8: Sorting of studied genes according to their polysaccharide-related functions highlights the absence of correlation with the occurrence of myxospermy. Presence of myxospermy (Yes) or its absence (No) are based on the results in Fig. 2. Genes are sorted according to their function in polysaccharide synthesis/modification (Table S1).
			Myxospermy	Yes	Yes	Yes	Yes	Yes	Yes	Yes	Yes	Yes	Yes	Yes	Yes	Yes	Yes	Yes	Yes	Yes	Yes	No	No	No	No	No	No	No	No	NA	NA	NA	NA	NA	NA
			PCW Rupture Zone	Radial	Radial	Radial	Intermediate	Intermediate	Central	Central	Central	unicel	unicel	Central	Central	Central	?	Central	Central	Central	No	No	No	No	No	No	No	No	No	NA	NA	NA	NA	NA	NA
			Columella	Yes	Yes	Yes	Yes	Yes	Yes	?	Yes	No	No	No	No	No	No	No	No	No	No	Yes	No	No	No	No	No	No	No	NA	NA	NA	NA	NA	NA
			Lineage	1	1	1	1	1	1	1	1	1	1	2	2	2	2	2	2	4	Basal	1	2	2	2	2	2	2	2	1	2	2	3	Clade C	Clade C
			Tribe	Camelineae	Camelineae	Camelineae	Camelineae	Camelineae	Camelineae		Cardamineae	Cardamineae	Cardamineae	Brassiceae	Brassiceae								Brassiceae	Brassiceae	Brassiceae	Brassiceae	Brassiceae			Camelineae	Brassiceae			Biscutelleae	Biscutelleae
			Species name	Arabidopsis thaliana	Arabidopsis lyrata	Arabidopsis halleri	Capsella rubella	Capsella grandiflora	Camelina sativa	Lepidium sativum	Cardamine hirsuta	Rorripa islandica	Leavenworthia alabamica	Brassica nigra	Sinapis alba	Sisymbrium irio	Stanleya pinnata	Schrenkiella parvula	Eutrema salsugineum	Arabis alpina	Aethionema arabicum	Boechera stricta	Brassica rapa	Brassica napus	Brassica oleraceae	Brassica juncea	Raphanus sativus	Thaspi avense	Noccae caerulescens	Capsella bursa-pastoris	Eruca vesicaria	Isatis tinctoria	Dipterocarpus strictus	Lunaria annua	Biscutella laevigata
AGI Code	Gene abreviation	Impact	Role	1	2	3	4	5	6	8	9	10	11	16	17	19	20	21	23	25	27	7	12	13	14	15	18	22	24	A	B	C	D	E	F
At1g18580	GAUT11	High	Pectin	1	1	1	1	1	4	2	1	1	3	0	4	1	1	2	1	1	1	1	3	7	3	5	3	1	1	2	4	4	1	1	2
At1g21070	URGT2	High	Pectin	1	1	1	1	1	3	2	1	1	2	0	1	1	1	1	1	1	1	1	2	4	3	3	1	1	1	2	1	3	1	2	2
At1g28240	MUCI70	High	Pectin	1	1	1	1	1	3	2	1	1	2	0	4	1	2	1	1	1	1	1	3	7	2	6	3	1	1	2	4	3	1	2	2
At1g53500	MUM4 / RHM2	High	Pectin	1	1	1	1	1	5	2	1	1	4	1	2	1	1	1	1	0	1	1	2	5	3	7	5	1	1	3	3	3	1	2	2
At1g63930	ROH1	High	Pectin	1	1	1	1	1	4	2	1	1	1	0	2	1	1	1	1	1	1	1	1	2	1	1	2	1	1	2	1	4	1	2	1
At2g20650	FLY2	High	Pectin	1	1	1	1	1	2	2	5	1	1	0	2	1	1	1	1	0	1	1	1	2	1	2	1	1	1	2	2	3	1	1	1
At4g28370	FLY1	High	Pectin	1	1	1	1	1	4	2	1	1	2	0	1	1	2	1	1	0	1	1	1	2	1	2	1	1	1	3	2	3	0	2	2
At3g09820	ADK1	High	Pectin	1	1	1	1	1	18	2	2	1	2	1	2	1	2	1	1	1	1	1	1	2	1	2	7	1	1	2	1	5	1	1	2
At3g10380	SEC8	High	Pectin	1	2	1	1	1	9	2	1	1	2	4	3	2	2	1	1	0	1	1	4	6	3	8	3	1	1	2	4	4	1	2	2
At3g51160	MUR1	High	Pectin	2	2	2	2	2	8	4	3	2	3	5	4	2	2	2	1	2	2	2	5	12	6	10	5	2	2	2	7	3	2	3	2
At5g63800	MUM2 / BGAL6	High	Pectin	1	1	0	1	1	3	2	1	1	2	2	2	1	1	1	1	1	1	1	2	5	2	4	6	1	1	2	3	3	1	1	4
At1g02720	GATL5	Medium	Pectin	1	1	0	1	1	4	0	1	1	0	0	1	1	1	1	1	0	1	1	1	2	1	2	1	1	0	2	1	0	0	0	0
At1g19900	RUBY	Medium	Pectin	1	1	1	1	1	3	6	1	1	1	0	3	1	2	1	1	2	1	1	4	11	6	0	4	1	1	2	3	4	1	2	3
At1g23200	HMS	Medium	Pectin	1	1	1	1	1	4	2	1	1	1	1	1	1	1	1	1	1	1	1	1	2	1	2	1	1	1	3	2	2	1	1	0
At1g27120	GALT4	Medium	Pectin	1	0	1	1	1	3	2	1	1	2	0	4	1	2	1	1	1	1	1	2	8	3	4	10	1	1	2	3	3	1	2	2
At1g74800	GALT5	Medium	Pectin	1	1	1	1	1	4	2	1	1	2	1	2	1	2	2	1	1	2	1	2	5	2	4	7	1	1	2	4	3	1	1	4
At2g18280	TPL2	Medium	Pectin	1	1	0	1	1	3	2	1	1	2	0	1	1	1	2	1	0	3	1	1	2	1	2	1	1	1	2	2	4	1	3	3
At2g47670	PMEI6	Medium	Pectin	1	1	1	1	1	3	2	1	1	2	2	2	1	0	1	1	1	1	1	2	2	2	4	3	1	1	2	2	1	1	2	1
At3g06440	GALT3	Medium	Pectin	1	1	1	1	1	3	2	1	1	1	1	1	1	1	1	1	0	1	1	1	1	1	2	1	1	1	2	2	2	1	1	2
At4g21060	GALT2	Medium	Pectin	1	1	1	1	1	5	2	1	1	1	1	1	1	1	1	1	1	1	1	1	2	0	2	1	1	1	3	1	5	1	1	1
At5g04160	UUAT1	Medium	Pectin	1	1	1	1	1	3	2	2	1	2	2	2	1	1	1	1	1	2	1	2	4	2	5	1	1	1	2	3	2	1	1	2
At5g15740	RRT1	Medium	Pectin	1	1	1	1	1	3	2	1	1	2	1	2	1	4	1	1	1	1	1	2	6	3	4	3	1	1	2	3	2	1	1	1
At5g62620	GALT6	Medium	Pectin	1	1	1	1	1	4	2	1	1	2	1	1	2	3	2	1	1	1	1	1	4	2	2	3	1	2	2	1	4	1	2	3
At5g05820	UUAT3	Medium	Pectin	1	2	1	1	1	3	2	2	1	2	0	1	1	0	1	1	0	1	1	2	4	4	3	1	1	2	2	1	2	1	2	2
At5g11230	UAFT2	Medium	Pectin	1	2	1	1	1	3	2	1	1	3	1	2	1	2	1	1	1	1	1	2	4	2	4	4	1	1	2	2	4	1	2	1
At1g56100	PMEI14	Low	Pectin	8	4	4	3	3	12	2	6	3	2	0	3	2	1	1	2	1	1	6	1	2	1	1	1	2	1	4	0	7	1	3	2
At5g49180	PME58	Low	Pectin	1	1	1	1	1	3	1	1	1	1	0	3	1	2	1	1	0	0	1	1	2	1	3	1	1	0	2	1	3	1	1	0
At2g22900	MUCI10	Medium	Hemicellulose	1	1	1	1	1	3	3	1	1	2	0	1	2	0	1	1	0	1	1	1	2	1	2	3	1	1	2	2	4	1	1	3
At5g22740	CSLA2	High	Mannan	1	1	1	1	1	4	2	1	1	3	1	4	2	4	1	1	1	1	1	3	6	3	4	4	1	2	4	6	4	1	2	5
At2g28110	IRX7	High	Xylan	1	1	1	1	1	3	2	1	1	1	3	2	1	2	1	1	1	1	1	2	5	2	4	2	1	1	2	5	4	1	1	1
At3g10320	MUCI21 / MUM5	High	Xylan	1	1	1	1	1	3	2	1	1	1	1	1	1	2	1	1	1	1	1	1	2	1	1	1	1	1	2	1	2	1	2	2
At4g36890	IRX14	High	Xylan	1	1	1	1	1	3	2	2	1	2	1	1	1	2	1	1	1	1	1	1	4	2	2	1	1	1	2	2	2	1	2	1
At5g49360	BXL1	High	Xylan	1	1	1	1	1	3	2	1	1	2	2	3	1	1	2	1	1	1	1	4	7	4	8	4	1	1	3	4	3	1	3	5
At5g09870	MUM3 / CESA5	High	Cellulose	1	1	1	1	1	4	2	1	1	2	1	2	1	1	1	1	1	0	1	1	2	1	2	1	1	1	2	1	2	1	2	1
At3g29810	COBL2	High	Cellulose	1	1	2	1	1	4	2	2	1	1	0	2	1	1	1	1	0	1	1	2	6	7	4	2	1	1	1	4	5	1	1	1
At4g39350	CESA2	Medium	Cellulose	1	1	1	1	1	3	2	1	1	1	1	0	1	0	1	1	0	1	1	1	2	1	2	0	1	1	2	0	4	0	2	0
At2g35620	FEI2	Medium	Cellulose	1	1	1	1	1	5	2	2	1	1	2	2	1	2	1	1	0	0	1	3	6	3	6	3	1	0	2	6	4	1	2	0
At3g46550	SOS5	Medium	Cellulose	1	1	1	1	1	3	2	1	1	2	0	2	1	1	2	1	1	1	1	1	2	1	2	2	1	1	4	2	4	1	2	3
At2g21770	CESA9	Low	Cellulose	1	1	1	0	0	0	0	0	0	0	0	0	0	0	0	0	0	1	0	0	0	0	0	0	0	0	0	0	0	1	1	1
At2g41770	STL1	Low	Cellulose	1	3	1	1	1	4	2	1	1	2	2	2	1	1	1	1	1	1	1	2	4	2	4	2	1	1	2	3	4	1	2	2
At3g57420	STL2	Low	Cellulose	1	1	1	1	1	4	2	3	1	0	0	0	0	1	1	1	1	0	1	0	0	0	0	0	1	1	2	0	3	1	1	1
At3g55940	PLC7	Low	Cellulose	1	1	0	2	1	3	2	1	1	1	1	2	2	4	2	1	1	2	1	2	5	2	4	5	1	1	4	4	9	2	1	1
At5g58690	PLC5	Low	Cellulose	1	1	1	1	1	3	2	1	1	1	1	1	1	1	1	1	0	1	1	4	6	3	4	6	1	1	2	2	3	1	2	2
At5g23940	DCR	High	Cutin	1	1	1	1	1	3	2	1	1	2	0	2	1	0	1	1	1	1	1	2	4	2	4	2	1	1	2	3	3	1	2	1
At5g67360	SBT1.7 / ARA12	High	Extrusion	1	1	1	1	1	3	2	2	1	1	1	1	2	2	1	1	0	1	1	2	4	3	3	2	1	1	2	2	2	1	2	1
At3g50990	PRX36	Medium	Extrusion	1	1	0	1	1	3	1	0	0	0	1	1	1	0	1	1	1	1	1	1	2	1	1	0	1	0	2	1	0	1	0	0
At5g67030	ABA1	High	Hormone	1	1	1	1	1	3	2	5	1	2	2	2	1	0	1	1	1	2	1	2	5	2	4	4	1	1	2	5	7	1	1	2
At3g05120	GID1A	Low	Hormone	1	1	1	1	1	3	2	1	1	2	1	2	1	1	1	1	1	1	1	1	2	1	2	1	1	1	2	3	2	1	1	1
At3g63010	GID1B	Low	Hormone	1	1	1	1	1	3	2	2	2	3	3	2	1	0	1	1	1	1	1	2	6	3	6	4	1	1	2	5	3	2	2	1
At4g02780	GA1	Low	Hormone	1	1	1	1	1	6	2	1	1	1	0	4	1	2	2	1	1	1	1	2	5	1	4	2	1	1	3	2	3	1	1	4
At1g74160	TRM4	Medium	Microtubule	2	2	2	2	2	8	2	4	2	3	1	4	3	4	3	2	1	3	2	2	6	3	7	3	2	2	4	5	10	2	3	3
At1g76880	DF1	High	Regulation	1	1	1	1	1	4	2	1	1	2	1	3	2	0	1	1	1	1	1	3	6	3	5	5	1	2	2	6	1	1	2	2
At1g79840	GL2	High	Regulation	1	0	1	1	1	4	2	2	1	1	1	1	1	3	2	1	1	1	1	1	2	1	1	1	1	1	2	1	1	1	1	3
At1g80330	GA3OX4	High	Regulation	1	1	1	1	1	1	1	1	1	2	0	1	1	1	1	1	0	1	1	1	2	1	2	1	1	4	2	3	1	1	1	2
At2g32700	LUH / MUM1	High	Regulation	1	1	1	1	1	4	2	3	1	3	3	3	1	2	1	1	0	2	1	4	10	6	7	8	1	1	2	3	7	1	2	3
At2g37260	TTG2 / DSL1	High	Regulation	1	1	1	1	1	4	2	3	1	1	2	2	1	1	1	1	0	1	1	2	5	2	5	2	1	1	2	2	4	1	1	2
At3g08850	RAPTOR1B	High	Regulation	1	1	1	1	1	3	2	1	1	4	4	3	1	2	1	1	1	1	1	1	4	3	4	3	1	1	2	3	2	1	1	2
At3g13540	MYB5	High	Regulation	1	1	1	1	1	3	2	1	1	1	4	1	1	2	1	1	1	1	1	2	4	2	6	2	1	1	2	3	5	1	2	1
At4g09960	STK	High	Regulation	1	1	1	1	1	3	2	2	1	1	1	1	2	2	1	1	0	1	1	2	4	3	3	2	1	1	2	2	2	1	2	1
At4g32551	LUG	High	Regulation	1	1	1	1	1	3	2	1	1	3	1	3	1	3	1	1	3	1	1	3	7	3	6	2	1	1	2	6	4	1	2	2
At4g36920	AP2	High	Regulation	1	1	1	1	1	4	2	1	1	3	1	2	1	0	1	1	1	1	1	2	5	2	3	2	1	1	2	3	4	1	2	2
At5g24520	TTG1	High	Regulation	1	1	1	1	1	8	2	2	1	2	0	1	1	1	1	1	1	1	1	3	4	2	2	1	1	1	1	3	4	1	1	1
At5g40330	MYB23	High	Regulation	1	1	1	1	1	3	2	1	1	0	1	2	0	2	2	1	1	1	1	1	1	1	2	1	1	1	2	1	5	1	1	3
At5g63840	RSW3	High	Regulation	1	1	0	1	1	4	2	1	1	2	2	1	1	1	1	1	1	1	1	2	8	2	4	6	1	1	2	1	3	1	2	7
At5g66730	ENY / IDD1	High	Regulation	1	1	1	1	1	4	2	1	1	1	2	2	1	0	1	1	1	1	1	2	3	2	4	2	1	1	2	2	3	1	2	2
At1g24260	SEP3	High	Regulation	1	1	1	1	1	4	2	3	1	2	0	5	1	0	1	1	1	1	1	3	7	4	7	2	1	1	2	4	2	1	2	3
At1g09540	MYB61	Medium	Regulation	1	1	1	1	1	3	2	1	1	2	0	3	1	0	1	1	1	1	1	3	6	3	6	3	1	1	2	4	1	1	3	2
At1g62990	KNAT7	Medium	Regulation	1	1	0	1	1	3	2	1	1	1	0	2	1	0	1	1	1	2	1	2	6	3	4	4	1	2	2	4	5	1	2	3
At4g09820	TT8	Medium	Regulation	1	1	1	1	1	5	2	1	1	2	1	2	1	2	1	1	1	0	1	1	3	2	2	1	1	1	2	2	4	2	1	5
At4g21030	DOF4.2	Medium	Regulation	4	3	2	4	3	10	4	8	4	3	4	12	3	4	6	14	2	2	3	10	23	13	16	7	3	5	7	14	21	2	3	2
At5g23260	ABS / TT16	Medium	Regulation	1	1	1	1	1	4	2	1	1	2	2	2	1	1	1	1	1	1	1	3	6	2	6	3	1	1	3	4	1	1	2	2
At5g35550	TT2	Medium	Regulation	1	1	1	1	1	4	1	1	1	1	0	1	1	2	1	1	1	1	1	1	2	1	3	1	1	1	2	1	2	1	2	2
At1g17950	MYB52	Low	Regulation	1	1	1	1	1	3	2	1	1	1	0	3	1	0	1	1	1	1	1	2	6	2	4	2	1	1	2	2	3	1	2	2
At1g23420	INO	Low	Regulation	1	1	1	1	1	3	2	1	1	2	1	2	1	0	1	1	1	1	1	2	4	2	4	2	1	1	2	2	3	1	2	1
At1g32240	KAN2	Low	Regulation	1	1	2	1	1	3	2	2	1	2	0	4	1	2	2	1	1	2	1	3	7	3	3	2	1	1	2	3	2	1	2	2
At1g52880	NARS2 / NAM	Low	Regulation	1	1	0	1	1	4	1	1	1	1	0	2	1	3	1	1	1	2	1	1	2	1	0	1	1	1	2	2	3	1	1	1
At1g56650	MYB75	Low	Regulation	4	5	3	3	7	20	15	4	6	7	2	4	5	1	3	1	1	3	2	3	8	4	7	6	1	3	15	12	6	4	6	2
At1g63650	EGL3	Low	Regulation	1	1	1	1	1	3	2	1	1	1	0	3	1	2	1	1	0	1	1	2	5	2	2	3	1	1	2	3	8	1	2	2
At3g58780	SHP1	Low	Regulation	1	1	2	1	1	3	2	4	1	2	3	2	1	1	2	1	0	2	1	3	9	3	5	3	1	1	3	7	3	1	1	1
At2g42830	SHP2	Low	Regulation	1	1	1	1	1	3	2	2	1	2	0	1	2	0	4	1	0	0	1	1	4	1	1	4	1	2	2	2	6	1	3	1
At3g15510	NARS1	Low	Regulation	1	1	1	1	1	3	2	1	1	1	3	3	1	2	1	1	1	0	1	3	6	3	5	3	1	1	2	3	2	1	2	1
At3g54720	AMP1	Low	Regulation	1	1	1	1	1	3	2	2	1	1	3	3	1	2	3	1	1	1	2	2	4	3	4	3	1	1	3	6	3	1	1	2
At4g11180	DIR12 / DP1	Low	Regulation	3	2	2	2	2	10	3	3	3	3	2	4	1	1	0	2	0	0	3	3	3	2	6	3	1	4	5	2	14	3	3	2
At5g16560	KAN1	Low	Regulation	1	1	1	1	1	3	2	1	1	3	2	4	1	0	1	1	1	1	1	3	7	3	5	3	1	1	2	4	3	1	2	2
At5g42630	ATS / KAN4	Low	Regulation	1	1	1	1	1	4	2	1	1	2	0	1	1	2	2	1	1	1	1	1	3	1	2	1	1	1	2	2	4	1	1	2
At5g60690	REV	Low	Regulation	1	1	1	1	1	5	2	2	1	2	0	3	1	2	1	1	1	1	1	2	8	6	4	3	1	1	4	2	3	1	2	6
At5g65410	HB25 / ZFHD2	Low	Regulation	1	1	0	1	1	3	2	1	1	3	3	3	1	0	1	1	1	1	1	3	5	3	6	2	1	1	2	4	3	1	2	1
At4g34210; At4g34470	SK11; SK12	Low	Regulation	9	7	4	9	5	23	10	8	8	2	4	11	9	6	6	13	4	5	6	9	22	9	14	9	22	11	15	14	5	16	2	3
At2g23760	BLH4	Low	Regulation	1	1	1	1	1	3	2	1	1	1	1	4	1	1	2	1	0	1	1	2	4	2	5	5	1	1	2	4	5	1	1	4
At4g36870	BLH2	Low	Regulation	1	1	1	1	1	4	2	1	1	1	1	2	1	0	1	1	0	2	1	2	4	2	4	2	1	1	2	3	3	1	2	2
At1g09330	ECH	High	Secretion	1	1	1	1	1	3	2	1	1	3	0	3	1	3	1	1	1	2	2	3	5	3	4	3	2	1	2	5	2	1	2	3
At1g60780	AP1M2	High	Secretion	1	1	0	1	1	3	2	1	1	1	0	2	1	1	2	1	1	1	1	2	5	3	3	2	1	1	2	2	5	1	2	2
At2g35630	MOR1	High	Secretion	2	2	2	2	2	4	5	3	2	1	3	2	1	2	1	1	1	6	2	3	10	2	1	4	1	1	5	4	2	1	2	3
At5g03540	EXO70A1	High	Secretion	1	1	1	1	1	5	2	2	1	2	1	3	1	0	2	1	1	1	1	2	5	2	3	2	2	1	2	4	3	1	2	2
At2g18840	YIP4A	Low	Secretion	1	1	1	1	1	4	2	1	1	0	0	0	1	0	2	0	0	2	1	0	0	0	0	0	1	0	2	0	8	1	2	3
At4g30260	YIP4B	Low	Secretion	1	1	1	1	1	3	2	1	1	3	2	3	1	2	1	1	1	0	1	4	8	8	6	3	1	2	2	4	5	1	2	1
At2g27600	SKD1	High	Unknow	1	1	1	1	1	7	2	1	1	3	2	3	1	2	1	1	0	0	1	2	4	3	4	2	1	1	2	3	3	0	2	3
At1g74450	ROH1D	Medium	Unknow	2	2	2	2	2	7	3	2	2	5	0	3	2	1	2	2	2	2	2	3	7	4	5	3	2	2	4	4	10	2	4	2
At3g56310	AGAL3	Low	Unknow	1	1	1	1	1	5	2	1	1	1	1	1	1	2	1	1	1	1	1	2	4	2	3	1	1	1	2	1	2	1	1	1
At5g08370	AGAL2	Low	Unknow	1	1	0	1	1	5	2	3	1	2	3	4	1	0	1	1	1	3	1	2	4	1	0	3	1	1	2	5	4	1	1	1
At5g15180	PRX56	Low	Unknow	1	2	2	2	2	3	2	1	1	0	1	2	1	0	1	1	0	1	2	2	4	2	4	2	1	1	4	3	3	1	2	2
At1g62000; At1g62060; At1g62080	TBA1; TBA2; TBA3	Low	Unknow	5	5	3	7	2	17	3	1	1	4	0	3	8	6	5	2	3	0	1	5	9	4	4	1	2	2	13	10	0	6	0	0

## Sheet: Table S9 Impact
Table S9: Sorting of studied genes according to their impact in myxospermy (strength of the phenotype in the corresponding mutant) highlights the absence of correlation with the occurrence of myxospermy. Presence of myxospermy (Yes) or its absence (No) are based on the results in Fig. 2. Genes are sorted according to their impact on myxospermy (Table S1).
			Myxospermy	Yes	Yes	Yes	Yes	Yes	Yes	Yes	Yes	Yes	Yes	Yes	Yes	Yes	Yes	Yes	Yes	Yes	Yes	No	No	No	No	No	No	No	No	NA	NA	NA	NA	NA	NA
			PCW Rupture Zone	Radial	Radial	Radial	Intermediate	Intermediate	Central	Central	Central	unicel	unicel	Central	Central	Central	?	Central	Central	Central	No	No	No	No	No	No	No	No	No	NA	NA	NA	NA	NA	NA
			Columella	Yes	Yes	Yes	Yes	Yes	Yes	?	Yes	No	No	No	No	No	No	No	No	No	No	Yes	No	No	No	No	No	No	No	NA	NA	NA	NA	NA	NA
			Lineage	1	1	1	1	1	1	1	1	1	1	2	2	2	2	2	2	4	Basal	1	2	2	2	2	2	2	2	1	2	2	3	Clade C	Clade C
			Tribe	Camelineae	Camelineae	Camelineae	Camelineae	Camelineae	Camelineae		Cardamineae	Cardamineae	Cardamineae	Brassiceae	Brassiceae								Brassiceae	Brassiceae	Brassiceae	Brassiceae	Brassiceae			Camelineae	Brassiceae			Biscutelleae	Biscutelleae
			Species name	Arabidopsis thaliana	Arabidopsis lyrata	Arabidopsis halleri	Capsella rubella	Capsella grandiflora	Camelina sativa	Lepidium sativum	Cardamine hirsuta	Rorripa islandica	Leavenworthia alabamica	Brassica nigra	Sinapis alba	Sisymbrium irio	Stanleya pinnata	Schrenkiella parvula	Eutrema salsugineum	Arabis alpina	Aethionema arabicum	Boechera stricta	Brassica rapa	Brassica napus	Brassica oleraceae	Brassica juncea	Raphanus sativus	Thaspi avense	Noccae caerulescens	Capsella bursa-pastoris	Eruca vesicaria	Isatis tinctoria	Dipterocarpus strictus	Lunaria annua	Biscutella laevigata
AGI Code	Gene abreviation	Impact	Role	1	2	3	4	5	6	8	9	10	11	16	17	19	20	21	23	25	27	7	12	13	14	15	18	22	24	A	B	C	D	E	F
At5g09870	MUM3 / CESA5	High	Cellulose	1	1	1	1	1	4	2	1	1	2	1	2	1	1	1	1	1	0	1	1	2	1	2	1	1	1	2	1	2	1	2	1
At3g29810	COBL2	High	Cellulose	1	1	2	1	1	4	2	2	1	1	0	2	1	1	1	1	0	1	1	2	6	7	4	2	1	1	1	4	5	1	1	1
At5g23940	DCR	High	Cutin	1	1	1	1	1	3	2	1	1	2	0	2	1	0	1	1	1	1	1	2	4	2	4	2	1	1	2	3	3	1	2	1
At5g67360	SBT1.7 / ARA12	High	Extrusion	1	1	1	1	1	3	2	2	1	1	1	1	2	2	1	1	0	1	1	2	4	3	3	2	1	1	2	2	2	1	2	1
At5g67030	ABA1	High	Hormone	1	1	1	1	1	3	2	5	1	2	2	2	1	0	1	1	1	2	1	2	5	2	4	4	1	1	2	5	7	1	1	2
At5g22740	CSLA2	High	Mannan	1	1	1	1	1	4	2	1	1	3	1	4	2	4	1	1	1	1	1	3	6	3	4	4	1	2	4	6	4	1	2	5
At1g18580	GAUT11	High	Pectin	1	1	1	1	1	4	2	1	1	3	0	4	1	1	2	1	1	1	1	3	7	3	5	3	1	1	2	4	4	1	1	2
At1g21070	URGT2	High	Pectin	1	1	1	1	1	3	2	1	1	2	0	1	1	1	1	1	1	1	1	2	4	3	3	1	1	1	2	1	3	1	2	2
At1g28240	MUCI70	High	Pectin	1	1	1	1	1	3	2	1	1	2	0	4	1	2	1	1	1	1	1	3	7	2	6	3	1	1	2	4	3	1	2	2
At1g53500	MUM4 / RHM2	High	Pectin	1	1	1	1	1	5	2	1	1	4	1	2	1	1	1	1	0	1	1	2	5	3	7	5	1	1	3	3	3	1	2	2
At1g63930	ROH1	High	Pectin	1	1	1	1	1	4	2	1	1	1	0	2	1	1	1	1	1	1	1	1	2	1	1	2	1	1	2	1	4	1	2	1
At2g20650	FLY2	High	Pectin	1	1	1	1	1	2	2	5	1	1	0	2	1	1	1	1	0	1	1	1	2	1	2	1	1	1	2	2	3	1	1	1
At4g28370	FLY1	High	Pectin	1	1	1	1	1	4	2	1	1	2	0	1	1	2	1	1	0	1	1	1	2	1	2	1	1	1	3	2	3	0	2	2
At3g09820	ADK1	High	Pectin	1	1	1	1	1	18	2	2	1	2	1	2	1	2	1	1	1	1	1	1	2	1	2	7	1	1	2	1	5	1	1	2
At3g10380	SEC8	High	Pectin	1	2	1	1	1	9	2	1	1	2	4	3	2	2	1	1	0	1	1	4	6	3	8	3	1	1	2	4	4	1	2	2
At3g51160	MUR1	High	Pectin	2	2	2	2	2	8	4	3	2	3	5	4	2	2	2	1	2	2	2	5	12	6	10	5	2	2	2	7	3	2	3	2
At5g63800	MUM2 / BGAL6	High	Pectin	1	1	0	1	1	3	2	1	1	2	2	2	1	1	1	1	1	1	1	2	5	2	4	6	1	1	2	3	3	1	1	4
At1g76880	DF1	High	Regulation	1	1	1	1	1	4	2	1	1	2	1	3	2	0	1	1	1	1	1	3	6	3	5	5	1	2	2	6	1	1	2	2
At1g79840	GL2	High	Regulation	1	0	1	1	1	4	2	2	1	1	1	1	1	3	2	1	1	1	1	1	2	1	1	1	1	1	2	1	1	1	1	3
At1g80330	GA3OX4	High	Regulation	1	1	1	1	1	1	1	1	1	2	0	1	1	1	1	1	0	1	1	1	2	1	2	1	1	4	2	3	1	1	1	2
At2g32700	LUH / MUM1	High	Regulation	1	1	1	1	1	4	2	3	1	3	3	3	1	2	1	1	0	2	1	4	10	6	7	8	1	1	2	3	7	1	2	3
At2g37260	TTG2 / DSL1	High	Regulation	1	1	1	1	1	4	2	3	1	1	2	2	1	1	1	1	0	1	1	2	5	2	5	2	1	1	2	2	4	1	1	2
At3g08850	RAPTOR1B	High	Regulation	1	1	1	1	1	3	2	1	1	4	4	3	1	2	1	1	1	1	1	1	4	3	4	3	1	1	2	3	2	1	1	2
At3g13540	MYB5	High	Regulation	1	1	1	1	1	3	2	1	1	1	4	1	1	2	1	1	1	1	1	2	4	2	6	2	1	1	2	3	5	1	2	1
At4g09960	STK	High	Regulation	1	1	1	1	1	3	2	2	1	1	1	1	2	2	1	1	0	1	1	2	4	3	3	2	1	1	2	2	2	1	2	1
At4g32551	LUG	High	Regulation	1	1	1	1	1	3	2	1	1	3	1	3	1	3	1	1	3	1	1	3	7	3	6	2	1	1	2	6	4	1	2	2
At4g36920	AP2	High	Regulation	1	1	1	1	1	4	2	1	1	3	1	2	1	0	1	1	1	1	1	2	5	2	3	2	1	1	2	3	4	1	2	2
At5g24520	TTG1	High	Regulation	1	1	1	1	1	8	2	2	1	2	0	1	1	1	1	1	1	1	1	3	4	2	2	1	1	1	1	3	4	1	1	1
At5g40330	MYB23	High	Regulation	1	1	1	1	1	3	2	1	1	0	1	2	0	2	2	1	1	1	1	1	1	1	2	1	1	1	2	1	5	1	1	3
At5g63840	RSW3	High	Regulation	1	1	0	1	1	4	2	1	1	2	2	1	1	1	1	1	1	1	1	2	8	2	4	6	1	1	2	1	3	1	2	7
At5g66730	ENY / IDD1	High	Regulation	1	1	1	1	1	4	2	1	1	1	2	2	1	0	1	1	1	1	1	2	3	2	4	2	1	1	2	2	3	1	2	2
At1g24260	SEP3	High	Regulation	1	1	1	1	1	4	2	3	1	2	0	5	1	0	1	1	1	1	1	3	7	4	7	2	1	1	2	4	2	1	2	3
At1g09330	ECH	High	Secretion	1	1	1	1	1	3	2	1	1	3	0	3	1	3	1	1	1	2	2	3	5	3	4	3	2	1	2	5	2	1	2	3
At1g60780	AP1M2	High	Secretion	1	1	0	1	1	3	2	1	1	1	0	2	1	1	2	1	1	1	1	2	5	3	3	2	1	1	2	2	5	1	2	2
At2g35630	MOR1	High	Secretion	2	2	2	2	2	4	5	3	2	1	3	2	1	2	1	1	1	6	2	3	10	2	1	4	1	1	5	4	2	1	2	3
At5g03540	EXO70A1	High	Secretion	1	1	1	1	1	5	2	2	1	2	1	3	1	0	2	1	1	1	1	2	5	2	3	2	2	1	2	4	3	1	2	2
At2g27600	SKD1	High	Unknow	1	1	1	1	1	7	2	1	1	3	2	3	1	2	1	1	0	0	1	2	4	3	4	2	1	1	2	3	3	0	2	3
At2g28110	IRX7	High	Xylan	1	1	1	1	1	3	2	1	1	1	3	2	1	2	1	1	1	1	1	2	5	2	4	2	1	1	2	5	4	1	1	1
At3g10320	MUCI21 / MUM5	High	Xylan	1	1	1	1	1	3	2	1	1	1	1	1	1	2	1	1	1	1	1	1	2	1	1	1	1	1	2	1	2	1	2	2
At4g36890	IRX14	High	Xylan	1	1	1	1	1	3	2	2	1	2	1	1	1	2	1	1	1	1	1	1	4	2	2	1	1	1	2	2	2	1	2	1
At5g49360	BXL1	High	Xylan	1	1	1	1	1	3	2	1	1	2	2	3	1	1	2	1	1	1	1	4	7	4	8	4	1	1	3	4	3	1	3	5
At4g39350	CESA2	Medium	Cellulose	1	1	1	1	1	3	2	1	1	1	1	0	1	0	1	1	0	1	1	1	2	1	2	0	1	1	2	0	4	0	2	0
At2g35620	FEI2	Medium	Cellulose	1	1	1	1	1	5	2	2	1	1	2	2	1	2	1	1	0	0	1	3	6	3	6	3	1	0	2	6	4	1	2	0
At3g46550	SOS5	Medium	Cellulose	1	1	1	1	1	3	2	1	1	2	0	2	1	1	2	1	1	1	1	1	2	1	2	2	1	1	4	2	4	1	2	3
At3g50990	PRX36	Medium	Extrusion	1	1	0	1	1	3	1	0	0	0	1	1	1	0	1	1	1	1	1	1	2	1	1	0	1	0	2	1	0	1	0	0
At2g22900	MUCI10	Medium	Hemicellulose	1	1	1	1	1	3	3	1	1	2	0	1	2	0	1	1	0	1	1	1	2	1	2	3	1	1	2	2	4	1	1	3
At1g74160	TRM4	Medium	Microtubule	2	2	2	2	2	8	2	4	2	3	1	4	3	4	3	2	1	3	2	2	6	3	7	3	2	2	4	5	10	2	3	3
At1g02720	GATL5	Medium	Pectin	1	1	0	1	1	4	0	1	1	0	0	1	1	1	1	1	0	1	1	1	2	1	2	1	1	0	2	1	0	0	0	0
At1g19900	RUBY	Medium	Pectin	1	1	1	1	1	3	6	1	1	1	0	3	1	2	1	1	2	1	1	4	11	6	0	4	1	1	2	3	4	1	2	3
At1g23200	HMS	Medium	Pectin	1	1	1	1	1	4	2	1	1	1	1	1	1	1	1	1	1	1	1	1	2	1	2	1	1	1	3	2	2	1	1	0
At1g27120	GALT4	Medium	Pectin	1	0	1	1	1	3	2	1	1	2	0	4	1	2	1	1	1	1	1	2	8	3	4	10	1	1	2	3	3	1	2	2
At1g74800	GALT5	Medium	Pectin	1	1	1	1	1	4	2	1	1	2	1	2	1	2	2	1	1	2	1	2	5	2	4	7	1	1	2	4	3	1	1	4
At2g18280	TPL2	Medium	Pectin	1	1	0	1	1	3	2	1	1	2	0	1	1	1	2	1	0	3	1	1	2	1	2	1	1	1	2	2	4	1	3	3
At2g47670	PMEI6	Medium	Pectin	1	1	1	1	1	3	2	1	1	2	2	2	1	0	1	1	1	1	1	2	2	2	4	3	1	1	2	2	1	1	2	1
At3g06440	GALT3	Medium	Pectin	1	1	1	1	1	3	2	1	1	1	1	1	1	1	1	1	0	1	1	1	1	1	2	1	1	1	2	2	2	1	1	2
At4g21060	GALT2	Medium	Pectin	1	1	1	1	1	5	2	1	1	1	1	1	1	1	1	1	1	1	1	1	2	0	2	1	1	1	3	1	5	1	1	1
At5g04160	UUAT1	Medium	Pectin	1	1	1	1	1	3	2	2	1	2	2	2	1	1	1	1	1	2	1	2	4	2	5	1	1	1	2	3	2	1	1	2
At5g15740	RRT1	Medium	Pectin	1	1	1	1	1	3	2	1	1	2	1	2	1	4	1	1	1	1	1	2	6	3	4	3	1	1	2	3	2	1	1	1
At5g62620	GALT6	Medium	Pectin	1	1	1	1	1	4	2	1	1	2	1	1	2	3	2	1	1	1	1	1	4	2	2	3	1	2	2	1	4	1	2	3
At5g05820	UUAT3	Medium	Pectin	1	2	1	1	1	3	2	2	1	2	0	1	1	0	1	1	0	1	1	2	4	4	3	1	1	2	2	1	2	1	2	2
At5g11230	UAFT2	Medium	Pectin	1	2	1	1	1	3	2	1	1	3	1	2	1	2	1	1	1	1	1	2	4	2	4	4	1	1	2	2	4	1	2	1
At1g09540	MYB61	Medium	Regulation	1	1	1	1	1	3	2	1	1	2	0	3	1	0	1	1	1	1	1	3	6	3	6	3	1	1	2	4	1	1	3	2
At1g62990	KNAT7	Medium	Regulation	1	1	0	1	1	3	2	1	1	1	0	2	1	0	1	1	1	2	1	2	6	3	4	4	1	2	2	4	5	1	2	3
At4g09820	TT8	Medium	Regulation	1	1	1	1	1	5	2	1	1	2	1	2	1	2	1	1	1	0	1	1	3	2	2	1	1	1	2	2	4	2	1	5
At4g21030	DOF4.2	Medium	Regulation	4	3	2	4	3	10	4	8	4	3	4	12	3	4	6	14	2	2	3	10	23	13	16	7	3	5	7	14	21	2	3	2
At5g23260	ABS / TT16	Medium	Regulation	1	1	1	1	1	4	2	1	1	2	2	2	1	1	1	1	1	1	1	3	6	2	6	3	1	1	3	4	1	1	2	2
At5g35550	TT2	Medium	Regulation	1	1	1	1	1	4	1	1	1	1	0	1	1	2	1	1	1	1	1	1	2	1	3	1	1	1	2	1	2	1	2	2
At1g74450	ROH1D	Medium	Unknow	2	2	2	2	2	7	3	2	2	5	0	3	2	1	2	2	2	2	2	3	7	4	5	3	2	2	4	4	10	2	4	2
At2g21770	CESA9	Low	Cellulose	1	1	1	0	0	0	0	0	0	0	0	0	0	0	0	0	0	1	0	0	0	0	0	0	0	0	0	0	0	1	1	1
At2g41770	STL1	Low	Cellulose	1	3	1	1	1	4	2	1	1	2	2	2	1	1	1	1	1	1	1	2	4	2	4	2	1	1	2	3	4	1	2	2
At3g57420	STL2	Low	Cellulose	1	1	1	1	1	4	2	3	1	0	0	0	0	1	1	1	1	0	1	0	0	0	0	0	1	1	2	0	3	1	1	1
At3g55940	PLC7	Low	Cellulose	1	1	0	2	1	3	2	1	1	1	1	2	2	4	2	1	1	2	1	2	5	2	4	5	1	1	4	4	9	2	1	1
At5g58690	PLC5	Low	Cellulose	1	1	1	1	1	3	2	1	1	1	1	1	1	1	1	1	0	1	1	4	6	3	4	6	1	1	2	2	3	1	2	2
At3g05120	GID1A	Low	Hormone	1	1	1	1	1	3	2	1	1	2	1	2	1	1	1	1	1	1	1	1	2	1	2	1	1	1	2	3	2	1	1	1
At3g63010	GID1B	Low	Hormone	1	1	1	1	1	3	2	2	2	3	3	2	1	0	1	1	1	1	1	2	6	3	6	4	1	1	2	5	3	2	2	1
At4g02780	GA1	Low	Hormone	1	1	1	1	1	6	2	1	1	1	0	4	1	2	2	1	1	1	1	2	5	1	4	2	1	1	3	2	3	1	1	4
At1g56100	PMEI14	Low	Pectin	8	4	4	3	3	12	2	6	3	2	0	3	2	1	1	2	1	1	6	1	2	1	1	1	2	1	4	0	7	1	3	2
At5g49180	PME58	Low	Pectin	1	1	1	1	1	3	1	1	1	1	0	3	1	2	1	1	0	0	1	1	2	1	3	1	1	0	2	1	3	1	1	0
At3g56310	AGAL3	Low	Unknow	1	1	1	1	1	5	2	1	1	1	1	1	1	2	1	1	1	1	1	2	4	2	3	1	1	1	2	1	2	1	1	1
At5g08370	AGAL2	Low	Unknow	1	1	0	1	1	5	2	3	1	2	3	4	1	0	1	1	1	3	1	2	4	1	0	3	1	1	2	5	4	1	1	1
At1g17950	MYB52	Low	Regulation	1	1	1	1	1	3	2	1	1	1	0	3	1	0	1	1	1	1	1	2	6	2	4	2	1	1	2	2	3	1	2	2
At1g23420	INO	Low	Regulation	1	1	1	1	1	3	2	1	1	2	1	2	1	0	1	1	1	1	1	2	4	2	4	2	1	1	2	2	3	1	2	1
At1g32240	KAN2	Low	Regulation	1	1	2	1	1	3	2	2	1	2	0	4	1	2	2	1	1	2	1	3	7	3	3	2	1	1	2	3	2	1	2	2
At1g52880	NARS2 / NAM	Low	Regulation	1	1	0	1	1	4	1	1	1	1	0	2	1	3	1	1	1	2	1	1	2	1	0	1	1	1	2	2	3	1	1	1
At1g56650	MYB75	Low	Regulation	4	5	3	3	7	20	15	4	6	7	2	4	5	1	3	1	1	3	2	3	8	4	7	6	1	3	15	12	6	4	6	2
At1g63650	EGL3	Low	Regulation	1	1	1	1	1	3	2	1	1	1	0	3	1	2	1	1	0	1	1	2	5	2	2	3	1	1	2	3	8	1	2	2
At3g58780	SHP1	Low	Regulation	1	1	2	1	1	3	2	4	1	2	3	2	1	1	2	1	0	2	1	3	9	3	5	3	1	1	3	7	3	1	1	1
At2g42830	SHP2	Low	Regulation	1	1	1	1	1	3	2	2	1	2	0	1	2	0	4	1	0	0	1	1	4	1	1	4	1	2	2	2	6	1	3	1
At3g15510	NARS1	Low	Regulation	1	1	1	1	1	3	2	1	1	1	3	3	1	2	1	1	1	0	1	3	6	3	5	3	1	1	2	3	2	1	2	1
At3g54720	AMP1	Low	Regulation	1	1	1	1	1	3	2	2	1	1	3	3	1	2	3	1	1	1	2	2	4	3	4	3	1	1	3	6	3	1	1	2
At4g11180	DIR12 / DP1	Low	Regulation	3	2	2	2	2	10	3	3	3	3	2	4	1	1	0	2	0	0	3	3	3	2	6	3	1	4	5	2	14	3	3	2
At5g16560	KAN1	Low	Regulation	1	1	1	1	1	3	2	1	1	3	2	4	1	0	1	1	1	1	1	3	7	3	5	3	1	1	2	4	3	1	2	2
At5g42630	ATS / KAN4	Low	Regulation	1	1	1	1	1	4	2	1	1	2	0	1	1	2	2	1	1	1	1	1	3	1	2	1	1	1	2	2	4	1	1	2
At5g60690	REV	Low	Regulation	1	1	1	1	1	5	2	2	1	2	0	3	1	2	1	1	1	1	1	2	8	6	4	3	1	1	4	2	3	1	2	6
At5g65410	HB25 / ZFHD2	Low	Regulation	1	1	0	1	1	3	2	1	1	3	3	3	1	0	1	1	1	1	1	3	5	3	6	2	1	1	2	4	3	1	2	1
At4g34210; At4g34470	SK11; SK12	Low	Regulation	9	7	4	9	5	23	10	8	8	2	4	11	9	6	6	13	4	5	6	9	22	9	14	9	22	11	15	14	5	16	2	3
At2g23760	BLH4	Low	Regulation	1	1	1	1	1	3	2	1	1	1	1	4	1	1	2	1	0	1	1	2	4	2	5	5	1	1	2	4	5	1	1	4
At4g36870	BLH2	Low	Regulation	1	1	1	1	1	4	2	1	1	1	1	2	1	0	1	1	0	2	1	2	4	2	4	2	1	1	2	3	3	1	2	2
At2g18840	YIP4A	Low	Secretion	1	1	1	1	1	4	2	1	1	0	0	0	1	0	2	0	0	2	1	0	0	0	0	0	1	0	2	0	8	1	2	3
At4g30260	YIP4B	Low	Secretion	1	1	1	1	1	3	2	1	1	3	2	3	1	2	1	1	1	0	1	4	8	8	6	3	1	2	2	4	5	1	2	1
At5g15180	PRX56	Low	Unknow	1	2	2	2	2	3	2	1	1	0	1	2	1	0	1	1	0	1	2	2	4	2	4	2	1	1	4	3	3	1	2	2
At1g62000; At1g62060; At1g62080	TBA1; TBA2; TBA3	Low	Unknow	5	5	3	7	2	17	3	1	1	4	0	3	8	6	5	2	3	0	1	5	9	4	4	1	2	2	13	10	0	6	0	0
