# Supplementary material for: Myxospermy Evolution in Brassicaceae: A Highly Complex and Diverse Trait with Arabidopsis as an Uncommon Model
Source: Cells. 2021 Sep 18;10(9):2470. doi: 10.3390/cells10092470 (PMC8469493; doi:10.3390/cells10092470)
Supplement: Supplementary file 1 [file cells-10-02470-s001.zip › Viudes et al_Table S10.xlsx]

## Sheet: Table S10
Table S10 (Related to Figure 7): Comparison of the relative expression values of A. thaliana MSC tool box gene orthologs between A. thaliana, C. sativa, B. napus and A. arabicum whole seed development illustrates their higher relative expression values in A. thaliana. The whole seed development kinetic expression values were retrieved from Belmonte et al (2013) PNAS for A. thaliana (transcriptomi…
Arabidopsis thaliana											Camelina sativa											Brassica napus									Aethionema arabicum (Dehiscent myxospermous diaspores)							Aethionema arabicum (Non dehiscent Non myxospermous diaspores)
					GSM311285 GSM311286	GSM499416 GSM499417	GSM378659 GSM378660	GSM499418 GSM499419	GSM501167 GSM501168	GSM378745 GSM378746						Early seed development (ESD; 4-12 DPA)_MEAN	Cs-14 (10-15 DAF) RPKM	Cs-21 (16-21 DAF) RPKM	Ealry-mid seed development (EMSD; 18 & 22 DPA)_MEAN	Late-mid seed development (LMSD; 26 & 30 DPA)_MEAN	Late seed development (LSD; 32 & 40 DPA)_MEAN														buds_cut_mean of 4 replicates	flower_cut_mean of 4 replicates	fruit_cut_mean of 4 replicates					buds_uncut_mean of 4 replicates	flower_uncut_mean of 4 replicates	fruit_uncut_mean of 4 replicates
ANNOTATION	ORF/AGI	SUM %	SUM RANK	SUM	pg WS	g WS	h WS	lc WS	bc WS	mg WS	ANNOTATION	ORF/AGI	SUM %	SUM RANK	SUM	ESD (4-12 DPA)	ESD (10-15 DPA)	EMSD (16-21 DPA)	EMSD (18, 22 DPA)	LMSD (26, 30 DPA)	LSD (32, 40 DPA)	ANNOTATION	ORF/AGI	SUM %	SUM RANK	SUM	2WAP	4WAP	6WAP	8WAP	ANNOTATION	ORF/AGI	SUM %	SUM	O DAP	1 DAP	30 DAP	ANNOTATION	ORF/AGI	SUM %	SUM	O DAP	1 DAP	30 DAP		DETAIL OF C. sativa HOMELOG GENES
RPL41	At3g11120		1	81868.8	10911.4	12175.3	12012.3	16266.5	15789.4	14714	CRU3	At4g28520		1	53602.2	5766.95	483.235	1126.4	27455.6	18449.7	320.291	SESA4	At4g27170		1	5.06264e+06	188.764	267843	4.20993e+06	584686	ZW9	AT1G58270		518633	200163	128860	189609	ZW9	AT1G58270		210794	97736.7	99911.6	13145.4		Csa12g021990.1	Csa10g014100.1	Csa11g015240.1
RBCS1A	At1g67090		2	69699.2	6418.06	10195.3	7479.29	14857.2	15114.4	15635.1	CRA1	At5g44120		2	76448.6	3044.15	19010.6	28687.3	14028	11434.2	244.292	CRU3	At4g28520		2	1.74418e+06	3.36078	8883.45	1.29794e+06	437348	EF1a	AT5G60390		390785	62913.7	223046	104825	EF1a	AT5G60390		196695	57304.7	55061.4	84328.9		Csa11g070590.1	Csa18g009670.1	#N/A
LTP	At5g38170		3	68135.8	449.885	1289.29	12078.3	20329.3	19600	14389	SESA1	At4g27140		3	67119.3	12160.4	927.116	2860.52	37036.5	14061	73.8234	OLEO1	At4g25140		3	1.37092e+06	35.2882	49967	538228	782689	VSP1	AT5G24780		367006	89680.4	194724	82601.8	LHB1B1	AT2G34430		182273	27762	32203.3	122308		Csa11g017020.1	Csa12g024730.1	#N/A
PSBF	ATCG00570		4	67748.3	7370.27	6750.2	7482.65	13427.6	14054.5	18663	SESA2	At4g27150		4	42248.4	8430.53	795.983	2250.46	23902	6804.17	65.3281	CUPIN	At1g03890		4	1.10128e+06	2.80065	13258.7	916828	171189	LHB1B1	AT2G34430		265080	39939	89753.1	135388	SAM1	AT1G02500		168012	9527.64	12069.8	146415		Csa11g017010.1	Csa12g024720.1	#N/A
PSAB	ATCG00340		5	62230	6446.17	7152.25	7427.03	12090.6	12330.3	16783.7	CRU2	At1g03880		5	37393.6	3104.36	2578.51	8781.36	15122.9	7784.74	21.7267	OLEO4	At3g27660		5	1.07628e+06	0.56013	18146	445535	612599	ZW9	AT1G58270		238580	101218	62109.3	75252	PRP4	AT4G38770		162407	108095	5186.6	49125.7		Csa17g006950.1	Csa14g004960.1	Csa03g005050.1
EF1a	At5g60390		6	58186.4	6102.18	12724.6	6676.77	12635.8	9599.96	10447.1	OLEO1	At4g25140		6	37874.7	2841.06	3662.36	7959.19	9756.05	11511.9	2144.2	M10	At2g41280		6	430742	0.56013	1.35625	21.0049	430719	TIP1	AT2G36830		221606	55713.4	56293.2	109600	LHCB5	AT4G10340		146369	24701.1	33418.9	88248.6		Csa10g017840.1	Csa12g028090.1	Csa11g019460.1
GRP	At1g04660		7	56520.5	37.9906	125.037	2009.69	14132.7	21874	18341	#N/A	#N/A		7	14697.1	2509.62	8188.06	963.679	3013.65	19.9899	2.11313	HSP17.4	At3g46230		7	333258	20.1647	42.7219	232.554	332963	RBCS1B	AT5G38430		219196	26461.3	57906.4	134829	TIP1	AT2G36830		143024	55281.4	20781.4	66961.1		Csa09g096800.1	#N/A	#N/A
ZBRP	At3g60245		8	56179.7	7929.56	9822.61	7253.53	11561.8	10701.8	8910.42	#N/A	At1g62220		8	14489.7	2151.72	11456.5	293.197	555.299	32.1743	0.836196	LECTIN	At3g21380		8	333070	1.68039	4.74688	4937.65	328126	LHCB5	AT4G10340		218918	33181.1	57597.4	128139	SAM1	AT1G02500		133332	18800.4	12207.2	102325		Csa09g096810.1	Csa16g054920.1	Csa07g063470.1
RBCL	ATCG00490		9	47371	4657.97	5929.26	5616.54	10258.4	9504.18	11404.7	#N/A	#N/A		9	14216.8	789.044	2212.15	6392.67	2770.5	1995.46	56.9989	CUPIN	At4g36700		9	323598	14.0033	36978.9	238701	47903.5	PRP4	AT4G38770		207492	88202.5	35417	83872.4	CCOAOMT1	AT4G34050		133154	3477.51	7819.04	121858		Csa11g070580.1	#N/A	#N/A
RPS8e	At5g20290		10	45313.5	4421.24	6701.27	6356.77	9795.48	10908.9	7129.87	SESA3	At4g27160		10	13057.7	1729.97	288.728	971.608	5709.23	4331.27	26.9236	SESA3	At4g27160		10	291503	0.56013	14930.3	245405	31167.5	ZW9	AT1G58270		197746	88905.8	34014.9	74825	METS1	AT5G17920		132206	26039	11302.5	94864.8		Csa11g017000.1	#N/A	#N/A
MEAN TOP10 GENES		100	1-10	61325.3	5474.47	5474.47	5474.47	5474.47	5474.47	5474.47	MEAN TOP10 GENES		100	1-10	37114.8	4252.78	4960.32	6028.64	13935	7642.46	295.653	MEAN TOP10 GENES		100	1-10	1.20675e+06	26.7742	41005.6	789776	375939	MEAN TOP10 GENES		100	284504	78637.9	93972.2	111894	MEAN TOP10 GENES		100	160827	42872.5	28996.2	88958
TBA2	At1g62060	33.2782	15	41893.6	15.7911	10.6137	17.6452	13371.7	15438.4	13039.4	TBA2	At1g62060			#N/A	#N/A	#N/A	#N/A	#N/A	#N/A	#N/A	TBA2	At1g62060		#N/A	#N/A	#N/A	#N/A	#N/A	#N/A	TBA2	At1g62060		#N/A	#N/A	#N/A	#N/A	TBA2	At1g62060		#N/A	#N/A	#N/A	#N/A		#N/A	#N/A	#N/A
SBT1.7 / ARA12	At5g67360	30.5381	173	13941.4	496.962	3862.96	2442.5	4007.3	2234.88	896.832	SBT1.7 / ARA12	At5g67360	2.34091		868.825	319.793	192.812	44.5373	87.7963	75.5971	148.289	SBT1.7 / ARA12	At5g67360	0.625224	1347	7544.88	760.657	3326.21	622.646	2835.37	SBT1.7 / ARA12	At5g67360	5.27669	15012.4	2665.42	5300.38	7046.59	SBT1.7 / ARA12	At5g67360	10.5611	16985	3548.99	4832.29	8603.71		Csa02g075330.1	Csa11g103550.1	Csa18g040090.1
PME58	At5g49180	26.6517	197	12793.5	2746.49	4769.25	3833.95	937.904	411.61	94.295	PME58	At5g49180	0.415935		154.374	71.967	59.451	14.8986	7.94615	0.0484353	0.062503	PME58	At5g49180		#N/A	#N/A	#N/A	#N/A	#N/A	#N/A	PME58	At5g49180		#N/A	#N/A	#N/A	#N/A	PME58	At5g49180		#N/A	#N/A	#N/A	#N/A		Csa02g035270.1	Csa18g018530.1	Csa11g078460.1
MUM4 / RHM2	At1g53500	14.9396	238	11165.4	405.352	519.016	887.023	4306.4	3145.56	1902.01	MUM4 / RHM2	At1g53500	0.52863		196.2	52.2607	123.64	11.5897	6.56634	1.57471	0.568913	MUM4 / RHM2	At1g53500	0.0644564	9854	777.825	345.601	246.838	171.04	14.3472	MUM4 / RHM2	At1g53500	0.590998	1681.41	540.228	483.882	657.303	MUM4 / RHM2	At1g53500	0.99406	1598.71	580.449	306.971	711.293		Csa14g064070.1	Csa03g060770.1	Csa17g093920.1
SHP2	At2g42830	14.5182	556	6258.74	1789.55	1495.29	1086.79	1091.3	553.262	242.554	SHP2	At2g42830	0.642586		238.495	66.7817	73.7792	57.125	33.4772	7.09012	0.241214	SHP2	At2g42830	0.356346	2637	4300.2	2661.18	1214.52	397.593	26.901	SHP2	At2g42830	0.219338	624.026	219.553	204.892	199.581	SHP2	At2g42830	0.402562	647.426	194.368	217.006	236.053		Csa06g048980.1	Csa05g008730.1	Csa04g059420.1
KNAT7	At1g62990	12.7748	581	6082.22	1333.37	1140.39	1765.54	1056.49	447.573	338.859	KNAT7	At1g62990	0.582915		216.348	89.9658	60.6726	28.1685	30.965	6.28522	0.290708	KNAT7	At1g62990	0.144894	6178	1748.5	571.333	776.454	354.083	46.6284	KNAT7	At1g62990	0.340326	968.241	112.719	101.218	754.305	KNAT7	At1g62990	1.01094	1625.86	137.202	108.978	1379.68		Csa16g055700.1	Csa09g097700.1	Csa07g064320.1
STK	At4g09960	11.8358	662	5351.84	2262.24	1913.41	888.019	136.363	77.0056	74.8001	STK	At4g09960	0.777034		288.395	70.3568	62.2968	76.0886	52.5284	27.1242	0	STK	At4g09960	0.0414005	11589	499.6	289.027	66.4563	88.5207	55.5954	STK	At4g09960	0.235539	670.119	224.372	225.076	220.671	STK	At4g09960	0.721708	1160.7	213.933	593.405	353.361		Csa13g044940.1	Csa02g026980.1	Csa08g038790.1
AP2	At4g36920	10.8122	739	4958.47	1239.37	1111.94	1037.75	714.393	487.612	367.405	AP2	At4g36920	0.143613		53.3018	8.37366	17.9055	18.59	5.97987	2.41279	0.039948	AP2	At4g36920	0.211623	4481	2553.75	1471.46	514.697	454.606	112.984	AP2	At4g36920		#N/A	#N/A	#N/A	#N/A	AP2	At4g36920		#N/A	#N/A	#N/A	#N/A		Csa11g004440.1	Csa12g004190.1	Csa10g003930.1
COBL2	At3g29810	10.7083	813	4529.62	1047	1342.95	930.501	499.856	423.9	285.417	COBL2	At3g29810	0.445706		165.423	42.0233	34.9019	55.7978	24.7783	7.85527	0.0662536	COBL2	At3g29810	0.141546	6280	1708.1	565.172	600.141	379.589	163.199	COBL2	At3g29810		#N/A	#N/A	#N/A	#N/A	COBL2	At3g29810		#N/A	#N/A	#N/A	#N/A		Csa09g024200.1	Csa04g019920.1	Csa06g012820.1
SHP1	At3g58780	8.69982	827	4486.09	2110.58	1206.62	866.706	128.433	92.3016	81.4509	SHP1	At3g58780	0.0970065		36.0038	12.931	6.03248	5.97129	5.84203	5.12663	0.100404	SHP1	At3g58780	0.195663	4803	2361.15	1054.73	578.441	579.135	148.852	SHP1	At3g58780	0.0470426	133.838	38.6281	38.7107	56.4994	SHP1	At3g58780	0.126945	204.161	33.9792	65.5477	104.634		Csa09g071410.1	Csa04g046300.1	Csa06g036530.1
SKD1	At2g27600	8.66854	1065	3644.67	421.401	764.705	565.873	773.795	559.503	559.392	SKD1	At2g27600	0.208464		77.3712	1.42225	38.1374	36.9252	0.620417	0.124255	0.14175	SKD1	At2g27600	0.635194	1328	7665.19	2020.95	2484.65	1893.44	1266.14	SKD1	At2g27600	1.86757	5313.31	1817.27	1699.72	1796.32	SKD1	At2g27600	3.87297	6228.77	1905.14	2029.4	2294.23		Csa07g061130.1	Csa05g041350.1	Csa16g051770.1
HMS	At1g23200	8.61325	1071	3631.56	11.2006	11.958	181.647	1673.73	1430.99	322.042	HMS	At1g23200	1.02372		379.953	60.7983	205.269	50.0453	38.8643	24.8901	0.0866161	HMS	At1g23200	0.548936	1592	6624.27	0.56013	6232.65	330.077	60.9756	HMS	At1g23200	0.466834	1328.16	914.136	291.582	122.444	HMS	At1g23200	0.938339	1509.1	866.78	580.749	61.5701		Csa14g030470.1	Csa17g030320.1	Csa03g027110.1
FEI2	At2g35620	8.46365	1077	3608.4	562.991	779.543	686.258	653.493	409.229	516.89	FEI2	At2g35620	0.26773		99.3675	22.2319	29.5932	25.0601	14.0685	6.29588	2.1179	FEI2	At2g35620	0.403873	2270	4873.72	1622.7	1274.2	1200.28	776.543	FEI2	At2g35620	0.627876	1786.33	638.811	513.621	633.9	FEI2	At2g35620	1.12109	1803.02	700.718	534.516	567.786		Csa06g038170.1	Csa05g018600.1	Csa04g049000.1
GL2	At1g79840	6.55188	1100	3545.73	212.789	914.028	336.871	1270.47	437.084	374.49	GL2	At1g79840	0.174498		64.7645	17.6805	34.218	8.56341	3.43876	0.469342	0.394458	GL2	At1g79840	0.25131	3785	3032.68	904.051	1181.97	699.163	247.489	GL2	At1g79840	0.468147	1331.9	39.1319	115.173	1177.59	GL2	At1g79840	0.703807	1131.91	46.4581	55.7738	1029.68		Csa09g095190.1	Csa07g060030.1	Csa16g050670.1
PMEI14	At1g56100	6.11085	1495	2744.82	719.375	1049.03	785.674	146.078	31.1918	13.4755	PMEI14	At1g56100	0.395701		146.864	138.804	7.98979	0.0694989	0	0	0	PMEI14	At1g56100		#N/A	#N/A	#N/A	#N/A	#N/A	#N/A	PMEI14	At1g56100		#N/A	#N/A	#N/A	#N/A	PMEI14	At1g56100		#N/A	#N/A	#N/A	#N/A		Csa17g096030.1	Csa03g062770.1	#N/A
DIR12 / DP1	At4g11180	6.04025	1617	2560.06	1.52405	1.36817	8.42514	1407.75	925.486	215.507	DIR12 / DP1	At4g11180	1.26049		467.83	308.419	153.735	1.82889	3.65599	0	0.191781	DIR12 / DP1	At4g11180		#N/A	#N/A	#N/A	#N/A	#N/A	#N/A	DIR12 / DP1	At4g11180		#N/A	#N/A	#N/A	#N/A	DIR12 / DP1	At4g11180		#N/A	#N/A	#N/A	#N/A		Csa13g048350.1	Csa02g020490.1	#N/A
NARS2 / NAM	At1g52880	5.87972	1642	2530.48	194.243	527.17	825.017	459.889	263.965	260.195	NARS2 / NAM	At1g52880	1.04906		389.356	118.941	64.6	83.5238	101.261	20.8521	0.177909	NARS2 / NAM	At1g52880	0.108392	7544	1308.02	337.199	318.041	532.624	120.158	NARS2 / NAM	At1g52880		#N/A	#N/A	#N/A	#N/A	NARS2 / NAM	At1g52880		#N/A	#N/A	#N/A	#N/A		Csa03g059990.1	Csa17g093060.1	Csa14g063200.1
UAFT2	At5g11230	5.44267	1697	2463.23	171.43	441.122	445.34	748.646	574.532	82.1589	UAFT2	At5g11230	0.853702		316.85	111.142	72.8223	26.5492	51.9073	24.5198	29.9093	UAFT2	At5g11230	0.638128	1321	7700.59	2339.1	2892.88	1758.41	710.187	UAFT2	At5g11230		#N/A	#N/A	#N/A	#N/A	UAFT2	At5g11230		#N/A	#N/A	#N/A	#N/A		Csa20g016660.1	Csa08g002350.1	Csa13g013970.1
BXL1	At5g49360	5.15319	1849	2280.13	76.3136	111.753	551.03	929.045	369.187	242.804	BXL1	At5g49360	1.07961		400.695	191.368	105.766	30.632	68.1721	4.54837	0.207742	BXL1	At5g49360	2.21866	257	26773.6	258.22	23921.6	1374.32	1219.51	BXL1	At5g49360	2.92722	8328.06	2274.49	3501.42	2552.14	BXL1	At5g49360	7.40217	11904.7	2425.02	7137.93	2341.71		Csa02g035520.1	Csa18g018780.1	Csa11g078680.1
SEP3	At1g24260	4.49222	1974	2158.86	1028.26	761.892	186.914	110.644	43.5049	27.6437	SEP3	At1g24260	0.192867		71.5824	31.2727	13.6543	13.0755	11.8899	1.68993	0	SEP3	At1g24260	0.376616	2485	4544.8	3199.47	956.835	288.067	100.43	SEP3	At1g24260		#N/A	#N/A	#N/A	#N/A	SEP3	At1g24260		#N/A	#N/A	#N/A	#N/A		Csa17g035980.1	Csa14g034830.1	Csa03g030490.1
MYB5	At3g13540	4.37898	2284	1881.95	486.542	708.541	476.261	88.3708	74.0302	48.2095	MYB5	At3g13540	0.140667		52.2084	16.1409	20.4505	9.59183	4.55855	1.44358	0.0230968	MYB5	At3g13540	0.0701973	9494	847.104	255.98	259.722	286.567	44.835	MYB5	At3g13540	0.0242726	69.0566	9.11836	18.5761	41.3622	MYB5	At3g13540	0.0456315	73.3876	4.5281	18.2069	50.6526		Csa15g017660.1	Csa19g018880.1	Csa01g015840.1
TT2	At5g35550	4.37496	2348	1834.51	820.851	502.939	373.03	66.1958	41.1996	30.2985	TT2	At5g35550	0.0321375		11.9278	8.60093	3.05904	0.203285	0.0645293	0	0	TT2	At5g35550	0.0429572	11442	518.385	259.901	142.406	103.524	12.5538	TT2	At5g35550	0.0165924	47.206	11.9661	17.2584	17.9815	TT2	At5g35550	0.0243787	39.2074	13.8448	17.8689	7.49376		Csa11g044930.1	Csa12g069680.1	Csa10g039800.1
AGAL3	At3g56310	4.23303	2351	1832.83	271.146	233.89	367.119	318.91	326.841	314.922	AGAL3	At3g56310	0.405537		150.514	28.3147	30.2735	38.5497	29.0004	17.4863	6.8896	AGAL3	At3g56310	0.497063	1787	5998.29	271.663	1750.92	2462.08	1513.63	AGAL3	At3g56310	0.533909	1518.99	268.748	464.203	786.041	AGAL3	At3g56310	0.672834	1082.1	237.7	453.486	390.91		Csa04g042730.1	Csa09g068610.1	Csa06g031030.1
CESA2	At4g39350	4.15705	2430	1773.37	280.662	513.374	448.239	163.31	145.886	221.9	CESA2	At4g39350	0.734065		272.447	48.19	65.0352	76.671	47.5555	25.2728	9.72232	CESA2	At4g39350	0.715388	1149	8632.92	2047.84	3307.22	2408.06	869.799	CESA2	At4g39350	1.06228	3022.23	780.175	572.161	1669.89	CESA2	At4g39350	1.40957	2266.96	763.551	369.438	1133.97		Csa12g002220.1	Csa11g002360.1	Csa10g002100.1
MUCI10	At2g22900	4.05841	2474	1741.54	123.375	134.819	204.76	494.757	413.381	370.449	MUCI10	At2g22900	0.331917		123.19	20.5586	41.4046	26.534	16.1809	12.4802	6.03205	MUCI10	At2g22900	0.216701	4388	2615.03	719.208	929.71	783.183	182.927	MUCI10	At2g22900	0.722206	2054.7	683.704	564.541	806.46	MUCI10	At2g22900	1.42269	2288.07	732.493	690.586	864.993		Csa16g044650.1	Csa09g087180.1	Csa07g052980.1
GA3OX4	At1g80330	3.90795	2528	1700.21	700.383	388.555	9.25934	84.7223	253.139	264.155	GA3OX4	At1g80330	0.0168817		6.26562	0.563677	0.0381267	1.62539	1.25991	2.62304	0.155482	GA3OX4	At1g80330	0.0891203	8425	1075.46	42.0098	467.229	562.631	3.5868	GA3OX4	At1g80330	0.152139	432.842	175.35	73.7285	183.763	GA3OX4	At1g80330	0.316434	508.91	63.2851	26.0563	419.569		Csa09g094680.1	Csa07g059530.1	Csa16g050100.1
MUR1	At3g51160	3.80034	2650	1637.18	359.565	437.995	212.109	291.173	194.869	141.472	MUR1	At3g51160	0.178018		66.0712	33.4382	9.44361	6.0206	8.64698	4.1038	4.418	MUR1	At3g51160	0.422163	2162	5094.44	1660.23	1603.09	1165.77	665.352	MUR1	At3g51160	0.985493	2803.77	708.889	960.243	1134.63	MUR1	At3g51160	1.21757	1958.18	760.737	429.974	767.469		Csa04g036950.1	Csa09g058130.1	Csa06g025310.1
GID1A	At3g05120	3.76813	2723	1592.1	209.128	230.205	500.888	185.121	292.302	174.456	GID1A	At3g05120	0.525995		195.222	25.5942	11.8649	15.6596	19.3226	58.5375	64.2432	GID1A	At3g05120	0.167993	5499	2027.26	244.777	240.735	847.698	694.046	GID1A	At3g05120	0.428938	1220.35	356.55	250.395	613.402	GID1A	At3g05120	1.03061	1657.5	424.985	918.129	314.389		Csa15g006340.1	Csa19g007380.1	Csa01g005910.1
URGT2	At1g21070	3.66667	2739	1578.61	96.31	73.2294	51.1393	399.443	523.171	435.315	URGT2	At1g21070	0.293339		108.872	30.1337	52.3534	11.9755	10.0269	3.34659	1.03633	URGT2	At1g21070	0.272524	3475	3288.68	842.996	1296.58	1030.74	118.364	URGT2	At1g21070	3.55128	10103.5	4066.03	2276.65	3760.86	URGT2	At1g21070	6.77273	10892.4	4942.55	2469.08	3480.73		Csa03g024920.1	Csa17g026940.1	Csa14g026250.1
RRT1	At5g15740	3.63444	2813	1536.1	56.1024	80.1424	55.2645	368.92	633.059	342.614	RRT1	At5g15740	2.46248		913.946	177.119	610.409	79.6417	33.2777	9.91669	3.58134	RRT1	At5g15740	0.38087	2451	4596.13	3078.48	802.901	481.613	233.142	RRT1	At5g15740		#N/A	#N/A	#N/A	#N/A	RRT1	At5g15740		#N/A	#N/A	#N/A	#N/A		Csa13g018540.1	Csa20g023250.1	Csa08g007880.1
UUAT3	At5g05820	3.40096	2837	1522.6	120.3	267.688	189.147	558.533	225.976	160.955	UUAT3	At5g05820	0.122835		45.5899	12.2898	9.09791	8.0481	7.24877	5.18981	3.71551	UUAT3	At5g05820	0.0889479	8431	1073.38	347.281	320.753	238.556	166.786	UUAT3	At5g05820		#N/A	#N/A	#N/A	#N/A	UUAT3	At5g05820		#N/A	#N/A	#N/A	#N/A		Csa13g007830.1	Csa08g058650.1	Csa20g008080.1
FLY1	At4g28370	3.22572	3058	1424.79	35.6489	97.8504	113.533	483.981	451.895	241.877	FLY1	At4g28370	0.415581		154.242	13.0213	52.4354	58.8713	18.6432	9.3355	1.93533	FLY1	At4g28370	0.262921	3608	3172.79	331.037	1320.31	1006.74	514.706	FLY1	At4g28370	0.646282	1838.7	343.137	340.012	1155.55	FLY1	At4g28370	1.33962	2154.46	357.443	420.001	1377.01		Csa11g015520.1	Csa10g014290.1	Csa12g022200.1
MOR1	At2g35630	3.18322	3224	1351.37	175.743	256.564	192.399	202.286	358.748	165.633	MOR1	At2g35630	0.213393		79.2005	6.6773	30.9686	24.0305	6.07345	6.59183	4.85886	MOR1	At2g35630	0.792042	981	9557.94	2522.83	2536.87	1558.86	2939.38	MOR1	At2g35630	1.38052	3927.63	1601.84	1109.92	1215.87	MOR1	At2g35630	2.72802	4387.38	1816.17	1191.7	1379.51		Csa04g049010.1	Csa05g018590.1	Csa06g038180.1
TT8	At4g09820	3.11167	3265	1333.57	311.85	186.922	288.413	172.116	188.78	185.487	TT8	At4g09820	0.228447		84.7876	10.5692	54.9933	15.2073	3.60216	0.415635	0	TT8	At4g09820	0.142337	6253	1717.65	427.94	572.338	615.144	102.224	TT8	At4g09820	0.163961	466.475	28.1508	118.732	319.592	TT8	At4g09820	0.324738	522.265	21.8668	128.155	372.243		Csa02g028180.1	Csa08g037600.1	Csa13g044750.1
ADK1	At3g09820	2.9626	3326	1303.59	84.8286	219.505	161.738	239.151	284.052	314.316	ADK1	At3g09820	1.67967		623.408	169.615	116.077	75.0945	50.2273	63.4848	148.909	ADK1	At3g09820	0.42407	2153	5117.45	2073.04	1434.24	1378.82	231.349	ADK1	At3g09820		#N/A	#N/A	#N/A	#N/A	ADK1	At3g09820		#N/A	#N/A	#N/A	#N/A		Csa19g013270.1	Csa01g010600.1	Csa15g011260.1
GALT6	At5g62620	2.95689	3506	1241.14	177.134	160.806	179.079	279.653	170.671	273.797	GALT6	At5g62620	0.660429		245.117	29.6795	47.6054	64.1017	42.7955	41.9253	19.01	GALT6	At5g62620	0.463958	1946	5598.8	819.471	950.054	1320.31	2508.97	GALT6	At5g62620	0.132829	377.903	36.8656	60.6918	280.346	GALT6	At5g62620	0.238468	383.52	44.661	129.804	209.055		Csa11g099460.1	Csa02g070750.1	Csa18g036050.1
SEC8	At3g10380	2.79798	3516	1238.75	156.113	171.491	143.677	345.726	199.574	222.167	SEC8	At3g10380	0.0557675		20.698	0.222771	9.65805	10.3154	0	0.30379	0.198042	SEC8	At3g10380	0.353958	2653	4271.38	1257.49	971.076	798.187	1244.62	SEC8	At3g10380	1.06513	3030.33	959.711	977.982	1092.64	SEC8	At3g10380	1.65287	2658.25	964.414	640.47	1053.36		Csa19g013940.1	Csa01g011220.1	Csa15g012860.1
UUAT1	At5g04160	2.77203	3703	1172.17	38.1077	132.809	146.947	470.157	241.545	142.608	UUAT1	At5g04160	0.140976		52.3231	10.8845	11.6416	10.6252	8.33138	6.95217	3.88811	UUAT1	At5g04160	0.0509978	10826	615.414	174.201	293.628	135.032	12.5538	UUAT1	At5g04160	0.935355	2661.12	882.266	1022.43	756.424	UUAT1	At5g04160	1.10298	1773.89	860.156	413.432	500.299		Csa13g006190.1	Csa08g060360.1	Csa20g005350.1
TTG1	At5g24520	2.75664	3735	1161.31	97.2273	231.797	255.977	232.502	205.19	138.613	TTG1	At5g24520	0.173879		64.5351	20.215	13.6046	11.7606	10.6718	4.85382	3.42932	TTG1	At5g24520	0.0854896	8604	1031.64	249.818	337.028	238.556	206.241	TTG1	At5g24520	0.441409	1255.83	378.243	471.437	406.145	TTG1	At5g24520	0.820263	1319.2	425.149	412.449	481.603		Csa08g019020.1	Csa20g040950.1	Csa13g029180.1
IRX14	At4g36890	2.71243	3758	1154.86	123.55	143.996	147.116	352.914	219.124	168.156	IRX14	At4g36890	0.355865		132.079	71.6045	22.8173	13.6046	14.069	5.82885	4.15428	IRX14	At4g36890	0.12282	6977	1482.12	527.643	564.879	264.062	125.538	IRX14	At4g36890	0.326502	928.912	135.979	122.644	670.288	IRX14	At4g36890	0.802098	1289.99	135.753	103.875	1050.36		Csa11g004400.1	Csa10g003900.1	Csa12g004150.1
MYB61	At1g09540	2.70873	3811	1136.33	176.624	176.197	373.16	215.567	135.445	59.3428	MYB61	At1g09540	0.505161		187.49	53.2524	71.2038	28.6828	29.1786	5.17209	0	MYB61	At1g09540	0.18896	4952	2280.27	1070.97	859.863	313.573	35.868	MYB61	At1g09540	0.105684	300.675	9.70682	11.8476	279.121	MYB61	At1g09540	0.271566	436.75	5.55823	33.8131	397.379		Csa17g013010.1	Csa03g012900.1	Csa14g010940.1
REV	At5g60690	2.66941	3820	1134.78	37.4787	105.426	190.18	356.887	241.07	203.743	REV	At5g60690	0.267661		99.3421	12.1597	34.093	29.7786	12.5371	6.67233	4.10143	REV	At5g60690	0.165737	5572	2000.02	310.872	720.848	808.689	159.613	REV	At5g60690	1.11683	3177.43	807.492	1703.02	666.919	REV	At5g60690	1.38384	2225.59	708.87	922.159	594.561		Csa18g034050.1	Csa11g094540.1	Csa02g067650.1
PRX56	At5g15180	2.48268	3876	1118.31	4.78623	8.89198	15.767	525.81	432.738	130.32	PRX56	At5g15180	0.176548		65.5256	13.4467	31.3234	9.68876	10.7245	0.342233	0	PRX56	At5g15180	0.000607639	19263	7.33266	3.36078	0.678126	1.50035	1.7934	PRX56	At5g15180	0.254994	725.468	1.36015	1.97616	722.131	PRX56	At5g15180	0.523577	842.052	1.85506	1.8113	838.386		Csa08g007260.1	Csa13g018010.1	Csa20g021670.1
GATL5	At1g02720	2.37564	4178	1040.08	47.1008	63.8072	34.5134	222.666	395.864	276.132	GATL5	At1g02720	0.544466		202.078	50.3057	118.567	14.2958	11.5017	4.51918	2.88822	GATL5	At1g02720	0.0117476	15095	141.764	137.792	0.678126	1.50035	1.7934	GATL5	At1g02720	0.141083	401.388	126.163	138.234	136.991	GATL5	At1g02720	0.245566	394.935	134.316	96.5514	164.068		Csa17g003690.1	Csa14g002780.1	Csa03g002780.1
YIP4A	At2g18840	2.21092	4343	995.242	188.829	237.003	200.613	153.27	124.747	90.7787	YIP4A	At2g18840	0.0876311		32.5241	8.37567	4.98563	4.82184	6.3104	4.68126	3.34935	YIP4A	At2g18840		#N/A	#N/A	#N/A	#N/A	#N/A	#N/A	YIP4A	At2g18840	1.92948	5489.45	1268.52	1592.78	2628.16	YIP4A	At2g18840	2.92924	4711	1180.76	879.004	2651.24		Csa01g042020.1	Csa15g079570.1	Csa19g058550.1
MUM2 / BGAL6	At5g63800	2.19721	4645	926.234	243.665	109.436	62.5018	253.901	187.076	69.6534	MUM2 / BGAL6	At5g63800	0.483883		179.592	39.6446	78.1583	36.9657	21.7166	2.55475	0.552624	MUM2 / BGAL6	At5g63800	0.128421	6760	1549.72	193.245	588.613	687.161	80.703	MUM2 / BGAL6	At5g63800	0.0442001	125.751	36.4078	51.817	37.5264	MUM2 / BGAL6	At5g63800	0.232272	373.556	49.7609	265.091	58.7039		Csa11g100880.1	Csa02g072490.1	Csa18g037390.1
ECH	At1g09330	2.17668	4672	920.489	153.809	170.46	183.106	179.103	118.517	115.494	ECH	At1g09330	0.663063		246.095	54.3858	47.2064	49.5478	40.4017	26.226	28.3271	ECH	At1g09330	0.248852	3815	3003.02	985.269	795.441	793.685	428.623	ECH	At1g09330	0.345297	982.385	326.959	248.109	407.316	ECH	At1g09330	0.602431	968.87	297.053	207.617	464.201		Csa03g012700.1	Csa14g010750.1	Csa17g012820.1
TRM4	At1g74160	2.14313	4715	911.891	68.6674	73.2427	228.194	198.381	243.044	100.361	TRM4	At1g74160	0.116251		43.1463	4.83348	9.08585	7.38593	6.26645	7.03374	8.5409	TRM4	At1g74160	0.196493	4780	2371.17	1011.04	391.957	240.056	728.121	TRM4	At1g74160	1.18287	3365.32	1733.59	1016.82	614.912	TRM4	At1g74160	2.04765	3293.17	1700.26	1246.03	346.87		Csa16g038100.1	Csa07g044420.1	Csa09g078770.1
RSW3	At5g63840	2.0858	4782	897.834	138.747	207.047	140.778	144.07	140.218	126.973	RSW3	At5g63840	0.529464		196.509	33.9077	46.343	33.8609	22.6008	22.1939	37.6032	RSW3	At5g63840	0.563606	1543	6801.3	2730.64	1953	984.23	1133.43	RSW3	At5g63840	2.00726	5710.74	1390.38	2276.58	2043.78	RSW3	At5g63840	2.77285	4459.48	1452.73	1139.77	1866.98		Csa11g100920.1	Csa02g072530.1	Csa18g037430.1
GALT4	At1g27120	2.06506	4909	873.818	143.589	100.288	112.353	177.195	132.338	208.056	GALT4	At1g27120	0.142027		52.713	8.09121	20.6721	15.256	7.03421	1.45374	0.205822	GALT4	At1g27120	0.18665	5008	2252.4	910.212	867.323	360.084	114.778	GALT4	At1g27120	0.366758	1043.44	195.5	248.751	599.192	GALT4	At1g27120	0.498182	801.21	217.06	233.079	351.071		Csa17g033620.1	Csa14g031460.1	Csa03g028330.1
HB25 / ZFHD2	At5g65410	2.04314	4956	865.129	1.86176	1.18535	48.9352	353.336	311.269	148.542	HB25 / ZFHD2	At5g65410	0.294847		109.432	8.01872	13.7456	5.91567	4.64528	11.787	65.3195	HB25 / ZFHD2	At5g65410	0.165259	5584	1994.26	3.36078	833.416	418.598	738.881	HB25 / ZFHD2	At5g65410	0.0753039	214.243	48.8161	115.932	49.4945	HB25 / ZFHD2	At5g65410	0.186218	299.488	44.1335	40.8195	214.534		Csa18g039210.1	Csa02g074380.1	Csa11g102640.1
LUH / MUM1	At2g32700	1.87447	5011	855.946	233.58	151.205	157.256	101.012	83.9738	128.92	LUH / MUM1	At2g32700	0.304559		113.037	19.4729	25.6543	25.1455	17.5438	14.2124	11.0077	LUH / MUM1	At2g32700	0.514292	1722	6206.21	1674.23	1632.93	1537.86	1361.19	LUH / MUM1	At2g32700	0.520175	1479.92	566.987	407.427	505.505	LUH / MUM1	At2g32700	0.969961	1559.96	590.394	503.171	466.391		Csa16g008660.1	Csa07g008850.1	Csa05g023960.1
ENY / IDD1	At5g66730	1.86771	5375	785.282	126.155	182.561	104.368	106.857	95.7012	169.64	ENY / IDD1	At5g66730	0.50842		188.699	14.6269	19.3107	27.2319	24.0183	43.2701	60.2415	ENY / IDD1	At5g66730	0.311721	3051	3761.69	177.001	355.338	544.627	2684.72	ENY / IDD1	At5g66730	0.218778	622.431	206.132	222.848	193.451	ENY / IDD1	At5g66730	0.608034	977.881	214.491	524.158	239.232		Csa11g104260.1	Csa18g041860.1	Csa02g076040.1
DF1	At1g76880	1.84498	5389	782.452	271.692	157.958	65.5845	63.2507	123.78	100.186	DF1	At1g76880	0.549482		203.939	38.3413	22.3464	15.0561	22.647	30.4163	75.1323	DF1	At1g76880	0.488757	1833	5898.06	2513.87	941.238	1008.24	1434.72	DF1	At1g76880	0.625462	1779.46	721.811	734.308	323.345	DF1	At1g76880	0.982229	1579.69	834.866	391.263	353.558		Csa09g082580.1	Csa07g048450.1	Csa16g041060.1
GAUT11	At1g18580	1.75539	5453	772.93	118.105	204.27	121.851	141.267	93.2223	94.2149	GAUT11	At1g18580	0.0861344		31.9686	11.7576	5.23667	4.31806	3.81333	3.54846	3.29447	GAUT11	At1g18580	0.0717796	9408	866.199	274.464	231.919	214.55	145.265	GAUT11	At1g18580	0.340584	968.974	305.147	260.44	403.388	GAUT11	At1g18580	0.579059	931.281	323.864	193.153	414.265		Csa14g023910.1	Csa03g022460.1	Csa17g024380.1
EGL3	At1g63650	1.7496	5704	735.396	99.9642	101.463	126.758	61.235	158.82	187.155	EGL3	At1g63650	0.0944058		35.0385	3.28087	9.51472	13.1123	5.19695	2.28703	1.64668	EGL3	At1g63650	0.0322469	12470	389.138	17.9242	131.556	214.55	25.1076	EGL3	At1g63650	0.235919	671.199	213.15	397.757	60.2918	EGL3	At1g63650	0.413101	664.376	185.561	325.241	153.574		Csa07g065130.1	Csa09g098460.1	Csa16g056360.1
LUG	At4g32551	1.71551	5727	732.97	99.858	97.0557	88.2576	141.755	141.175	164.869	LUG	At4g32551	0.234783		87.1394	14.4858	18.4205	15.8772	14.7675	12.6085	10.9799	LUG	At4g32551	0.507515	1746	6124.43	1032.32	1691.92	1506.35	1893.83	LUG	At4g32551	0.858643	2442.87	930.189	850.498	662.186	LUG	At4g32551	1.51155	2430.97	1046.55	822.085	562.334		Csa12g013460.1	Csa11g010680.1	Csa10g009850.1
DCR	At5g23940	1.71197	5824	718.688	117.996	100.414	110.673	74.9926	172.374	142.239	DCR	At5g23940	0.465672		172.833	95.7299	41.1333	10.1768	4.66757	8.9616	12.1643	DCR	At5g23940	0.872478	854	10528.6	7181.43	2896.27	115.527	335.366	DCR	At5g23940	1.12216	3192.59	1814.94	629.107	748.545	DCR	At5g23940	1.90767	3068.04	2437.73	189.551	440.752		Csa08g018210.1	Csa13g028430.1	Csa20g039090.1
AP1M2	At1g60780	1.63509	5833	717.206	60.4493	103.546	101.783	178.544	171.375	101.508	AP1M2	At1g60780	0.297271		110.332	25.1739	25.3166	21.6276	14.298	14.4612	9.45454	AP1M2	At1g60780	0.0144295	14705	174.128	58.8137	33.2282	48.0112	34.0746	AP1M2	At1g60780	0.875642	2491.24	699.989	592.371	1198.88	AP1M2	At1g60780	1.40697	2262.78	836.657	632.82	793.303		Csa16g052580.1	Csa07g061910.1	Csa05g044770.1
CSLA2	At5g22740	1.53497	6054	684.999	105.076	112.005	39.3164	126.295	122.52	179.787	CSLA2	At5g22740	0.455736		169.146	24.5694	48.9624	48.3804	31.2031	8.82739	7.20285	CSLA2	At5g22740	0.414135	2212	4997.57	1458.02	1918.42	1506.35	114.778	CSLA2	At5g22740	1.24227	3534.32	1186.57	1703.31	644.443	CSLA2	At5g22740	2.33546	3756.04	1566.04	1577.47	612.525		Csa20g036450.1	Csa13g026260.1	Csa08g015970.1
EXO70A1	At5g03540	1.42689	6355	643.056	107.582	95.6566	93.0577	114.832	107.843	124.085	EXO70A1	At5g03540	0.318991		118.393	14.6453	16.5157	23.8229	18.0077	17.1243	28.2769	EXO70A1	At5g03540	0.132788	6588	1602.41	332.718	400.094	331.577	538.02	EXO70A1	At5g03540	0.509967	1450.88	505.557	415.431	529.89	EXO70A1	At5g03540	0.968041	1556.87	521.121	408.854	626.894		Csa08g061010.1	Csa13g003490.1	Csa20g003580.1
PRX36	At3g50990	1.2616	6756	597.777	2.04004	4.05171	9.31149	553.609	20.0488	8.71556	PRX36	At3g50990	0.0636223		23.6133	12.8072	6.20633	0.174953	0.453756	3.14779	0.823226	PRX36	At3g50990	0.152449	5942	1839.68	11.7627	1794.32	30.007	3.5868	PRX36	At3g50990	0.542085	1542.26	78.7574	438.574	1024.92	PRX36	At3g50990	1.19237	1917.65	59.9291	162.3	1695.42		Csa09g057960.1	Csa06g025120.1	Csa04g036750.1
MUM3 / CESA5	At5g09870	1.17821	7416	528.53	73.2871	59.0984	38.4676	118.618	138.914	100.145	MUM3 / CESA5	At5g09870	0.334368		124.1	28.2363	40.741	34.1143	15.387	3.94256	1.679	MUM3 / CESA5	At5g09870	0.840963	896	10148.3	722.568	8378.92	1012.74	34.0746	MUM3 / CESA5	At5g09870		#N/A	#N/A	#N/A	#N/A	MUM3 / CESA5	At5g09870		#N/A	#N/A	#N/A	#N/A		Csa20g013060.1	Csa13g011570.1	Csa08g054780.1
ABA1	At5g67030	1.09967	7805	493.594	74.9216	55.1026	137.474	92.6344	61.5487	71.9123	ABA1	At5g67030	0.66462		246.673	27.5833	33.5351	44.175	43.0791	53.436	44.8641	ABA1	At5g67030	1.11848	616	13497.2	1556.04	1681.07	2313.54	7946.56	ABA1	At5g67030	1.29107	3673.16	1240.19	547.174	1885.79	ABA1	At5g67030	1.98612	3194.2	1117.13	723.529	1353.54		Csa02g075650.1	Csa11g103900.1	Csa18g040510.1
MUCI70	At1g28240	1.03961	8166	460.693	86.1182	104.415	77.8616	79.5452	60.5764	52.1765	MUCI70	At1g28240	0.161972		60.1156	15.9654	15.0633	12.522	8.9276	5.77372	1.86363	MUCI70	At1g28240	0.265716	3574	3206.52	1152.75	889.023	748.675	416.069	MUCI70	At1g28240	0.206828	588.435	146.37	131.68	310.385	MUCI70	At1g28240	0.39026	627.642	162.828	146.196	318.618		Csa14g035840.1	Csa03g031510.1	Csa17g039090.1
BLH2	At4g36870	1.02499	8477	435.529	11.0964	17.9323	21.3877	182.028	132.573	70.5109	BLH2	At4g36870	0.143721		53.3418	11.086	14.3566	11.5277	8.831	4.76657	2.77398	BLH2	At4g36870	0.178731	5221	2156.83	295.189	906.654	537.126	417.862	BLH2	At4g36870		#N/A	#N/A	#N/A	#N/A	BLH2	At4g36870		#N/A	#N/A	#N/A	#N/A		Csa12g004570.1	Csa11g004810.1	Csa10g004320.1
TTG2 / DSL1	At2g37260	0.962723	8557	429.405	171.249	68.5266	72.0257	41.9648	30.6052	45.0337	TTG2 / DSL1	At2g37260	0.0953199		35.3778	7.80622	11.4943	9.64371	4.56116	1.12823	0.744242	TTG2 / DSL1	At2g37260	0.0613646	10071	740.516	275.024	232.597	166.539	66.3558	TTG2 / DSL1	At2g37260	0.04756	135.31	19.7965	51.0386	64.4751	TTG2 / DSL1	At2g37260	0.0918205	147.672	17.8949	52.6871	77.0898		Csa06g039950.1	Csa04g050830.1	Csa05g016590.1
BLH4	At2g23760	0.95034	8896	403.32	9.27451	6.2649	25.5465	175.155	131.904	55.1744	BLH4	At2g23760	0.158885		58.9701	10.7701	18.5547	9.21323	4.84606	5.41029	10.1757	BLH4	At2g23760	0.229741	4127	2772.39	148.995	1250.46	940.72	432.21	BLH4	At2g23760		#N/A	#N/A	#N/A	#N/A	BLH4	At2g23760		#N/A	#N/A	#N/A	#N/A		Csa07g053750.1	Csa16g045430.1	Csa09g087930.1
NARS1	At3g15510	0.877445	8951	398.132	11.2802	43.8461	89.9491	98.9217	64.907	89.2278	NARS1	At3g15510	1.00931		374.604	157.601	59.9398	34.3422	108.395	14.0863	0.239712	NARS1	At3g15510	0.760792	1055	9180.83	2174.43	3621.87	2936.19	448.35	NARS1	At3g15510	0.166158	472.725	80.5387	49.2451	342.942	NARS1	At3g15510	0.677287	1089.26	102.288	137.933	849.037		Csa19g022280.1	Csa01g018100.1	Csa15g020050.1
STL1	At2g41770	0.828001	9383	367.593	77.8624	45.4771	53.0262	56.739	72.0204	62.4683	STL1	At2g41770	0.0963378		35.7556	9.47164	7.89925	7.49607	4.72197	2.96672	3.19997	STL1	At2g41770	0.453944	2008	5477.96	1770.01	2014.03	931.718	762.195	STL1	At2g41770	1.37166	3902.43	503.18	677.897	2721.36	STL1	At2g41770	2.45895	3954.65	470.531	328.631	3155.49		Csa04g056280.1	Csa05g009810.1	Csa06g047790.1
PMEI6	At2g47670	0.805421	9701	346.88	5.75615	5.90506	13.3324	236.156	51.5535	34.1767	PMEI6	At2g47670	0.0923413		34.2723	21.8291	4.38268	1.22722	5.58975	1.2436	0	PMEI6	At2g47670	0.0594048	10210	716.865	22.4052	325.5	30.007	338.953	PMEI6	At2g47670	0.285199	811.402	74.6566	68.6129	668.133	PMEI6	At2g47670	0.679381	1092.63	44.6475	38.7909	1009.19		Csa06g054190.1	Csa04g067810.1	#N/A
STL2	At3g57420	0.804316	9863	337.42	69.6921	42.3612	85.1665	34.9353	55.2319	50.0331	STL2	At3g57420	0.206378		76.5967	17.8766	17.2031	16.2447	11.4197	6.89269	6.95997	STL2	At3g57420		#N/A	#N/A	#N/A	#N/A	#N/A	#N/A	STL2	At3g57420		#N/A	#N/A	#N/A	#N/A	STL2	At3g57420		#N/A	#N/A	#N/A	#N/A		Csa06g033140.1	Csa04g043850.1	Csa09g069880.1
RAPTOR1B	At3g08850	0.739453	9871	336.957	46.055	75.5707	49.0317	56.1293	53.1147	57.0559	RAPTOR1B	At3g08850	0.147824		54.8645	6.8346	10.2683	11.8153	7.34813	10.4994	8.09866	RAPTOR1B	At3g08850	0.302833	3148	3654.43	774.66	809.004	609.142	1461.62	RAPTOR1B	At3g08850	0.791117	2250.76	606.859	784.718	859.182	RAPTOR1B	At3g08850	1.35872	2185.19	700.868	744.647	739.674		Csa19g012200.1	Csa01g009520.1	Csa15g010100.1
FLY2	At2g20650	0.707634	10329	309.784	29.1218	59.8029	30.2227	61.1276	82.3049	47.2036	FLY2	At2g20650	0.0728975		27.0558	9.05631	5.56351	4.75237	3.62472	2.68735	1.37154	FLY2	At2g20650	0.080914	8845	976.427	171.4	362.797	270.063	172.166	FLY2	At2g20650	0.412415	1173.34	339.956	289.05	544.331	FLY2	At2g20650	0.930459	1496.43	370.469	288.309	837.648		Csa15g082330.1	#N/A	#N/A
GALT5	At1g74800	0.592464	10608	296.453	71.5437	47.8304	54.4342	46.7107	38.7186	37.2159	GALT5	At1g74800	0.0564316		20.9445	2.81701	5.43152	5.69618	2.44668	2.85888	1.69423	GALT5	At1g74800	0.192811	4863	2326.74	714.166	377.038	505.618	729.914	GALT5	At1g74800	0.283095	805.417	296.455	272.754	236.207	GALT5	At1g74800	0.514667	827.722	308.281	274.563	244.878		Csa09g079380.1	Csa07g046230.1	Csa16g038690.1
GALT2	At4g21060	0.559165	11561	248.205	79.2347	41.2955	43.1399	22.5958	34.2217	27.717	GALT2	At4g21060	0.076957		28.5624	17.4452	0.18122	0.700722	6.27546	1.81752	2.14233	GALT2	At4g21060	0.0452436	11290	545.976	190.444	154.613	91.5214	109.397	GALT2	At4g21060	0.0726736	206.76	58.916	78.95	68.8936	GALT2	At4g21060	0.115383	185.567	63.5578	65.9019	56.1072		Csa12g037520.1	Csa11g025470.1	Csa10g022450.1
AMP1	At3g54720	0.55049	11846	234.255	27.1841	21.1949	24.1704	43.1799	48.2879	70.2375	AMP1	At3g54720	0.0533819		19.8126	1.92893	2.40795	4.11099	1.7778	2.3201	7.26682	AMP1	At3g54720	0.0415848	11578	501.823	93.5418	190.553	33.0077	184.72	AMP1	At3g54720	0.334101	950.53	413.579	341.709	195.242	AMP1	At3g54720	0.624898	1005	403.01	426.038	175.955		Csa04g040840.1	Csa09g064480.1	Csa06g029180.1
DUF793	At1g74450	0.52137	11932	230.62	21.6917	51.2098	66.5144	33.3291	32.3326	25.5428	DUF793	At1g74450	0.0828046		30.7328	11.6571	3.10194	4.69111	7.16123	2.70436	1.41704	DUF793	At1g74450	0.125083	6893	1509.43	497.396	271.928	315.074	425.036	DUF793	At1g74450	0.290885	827.581	93.1248	115.482	618.974	DUF793	At1g74450	0.297731	478.832	106.214	89.3052	283.312		Csa07g045830.1	Csa16g038380.1	Csa09g079020.1
INO	At1g23420	0.498508	12222	218.421	115.566	40.9897	23.8145	15.4863	4.03449	18.5293	INO	At1g23420	0.00821634		3.04948	2.58085	0.163565	0.178141	0.126927	0	0	INO	At1g23420	0.03478	12215	419.707	415.057	1.35625	1.50035	1.7934	INO	At1g23420	0.0228661	65.0549	27.2623	32.631	5.16154	INO	At1g23420	0.0436738	70.2392	22.4042	40.2098	7.62516		Csa17g030590.1	Csa14g030690.1	Csa03g027340.1
GALT3	At3g06440	0.425439	12431	208.843	66.7675	37.1579	36.4772	10.1743	29.0517	29.2145	GALT3	At3g06440	0.114834		42.6205	7.9672	13.0307	12.3972	5.26569	3.09072	0.869006	GALT3	At3g06440	0.0990381	7984	1195.14	549.488	283.457	211.549	150.646	GALT3	At3g06440	0.0131011	37.2733	4.64686	17.2158	15.4107	GALT3	At3g06440	0.0299456	48.1605	6.55768	28.248	13.3548		Csa15g008020.1	Csa19g010100.1	Csa01g007490.1
IRX7	At2g28110	0.371866	13164	178.232	34.7917	18.1988	22.3107	54.6465	24.917	23.367	IRX7	At2g28110	0.135758		50.3864	21.7342	12.9075	5.73057	7.1826	2.79699	0.0345067	IRX7	At2g28110	0.120829	7065	1458.11	124.349	821.21	442.603	69.9426	IRX7	At2g28110	0.268304	763.336	85.8222	51.2209	626.293	IRX7	At2g28110	0.675068	1085.69	91.0987	151.102	843.488		Csa05g038700.1	#N/A	#N/A
AGAL2	At5g08370	0.357332	13754	155.788	51.0928	25.2809	18.7404	24.5887	7.93994	28.1455	AGAL2	At5g08370	0.0316051		11.7302	6.46367	0.911063	0.513216	1.43889	1.75773	0.645614	AGAL2	At5g08370	0.0157447	14504	189.999	3.36078	70.5251	112.526	3.5868	AGAL2	At5g08370	0.0257189	73.1714	37.6129	21.2085	14.3499	AGAL2	At5g08370	0.0352676	56.7198	20.401	19.5413	16.7775		Csa13g010420.1	Csa20g011820.1	Csa08g055970.1
ABS / TT16	At5g23260	0.329654	13911	149.699	59.0806	45.1747	26.7446	13.2856	1.30559	4.10817	ABS / TT16	At5g23260	0.0560068		20.7868	9.53175	6.96834	3.19535	1.00024	0.091145	0	ABS / TT16	At5g23260	0.35336	2656	4264.15	4058.15	132.235	63.0147	10.7604	ABS / TT16	At5g23260	0.0495585	140.996	46.2285	61.6829	33.0846	ABS / TT16	At5g23260	0.110195	177.223	34.2328	66.529	76.4609		Csa08g017610.1	Csa20g038200.1	Csa13g027840.1
CESA9	At2g21770	0.327226	14222	138.104	10.6521	17.0351	7.72477	23.258	25.85	53.5841	CESA9	At2g21770			#N/A	#N/A	#N/A	#N/A	#N/A	#N/A	#N/A	CESA9	At2g21770		#N/A	#N/A	#N/A	#N/A	#N/A	#N/A	CESA9	At2g21770	0.0285275	81.1619	29.3997	11.4503	40.3119	CESA9	At2g21770	0.041558	66.8364	27.2901	11.6316	27.9147		#N/A	#N/A	#N/A
PLC7	At3g55940	0.319467	14257	137.087	22.9519	37.332	56.4279	14.0691	1.44189	4.86393	PLC7	At3g55940	0.0323061		11.9903	2.39925	1.55757	3.47677	0.821843	2.78106	0.953866	PLC7	At3g55940	0.00736751	15855	88.9072	62.1745	10.85	10.5025	5.3802	PLC7	At3g55940	0.0242193	68.905	3.53322	5.56785	59.8039	PLC7	At3g55940	0.0601087	96.6707	5.8575	12.0279	78.7854		Csa06g030610.1	Csa04g042310.1	Csa09g068070.1
ROH1	At1g63930	0.311328	14361	133.836	25.2158	27.6139	16.6528	8.12268	14.808	41.4231	ROH1	At1g63930	0.00882918		3.27694	0.732036	0.254028	0.51314	0.708437	0.955566	0.113729	ROH1	At1g63930	0.0308198	12614	371.917	6.16144	107.144	246.058	12.5538	ROH1	At1g63930	0.0341522	97.1645	56.2307	4.05328	36.8805	ROH1	At1g63930	0.0564857	90.8441	60.4582	10.5665	19.8193		Csa09g098750.1	Csa16g056620.1	Csa07g065410.1
ATS / KAN4	At5g42630	0.297298	14461	130.427	14.2343	8.16727	23.7992	16.9014	35.1109	32.2137	ATS / KAN4	At5g42630	0.0176727		6.55918	0.514257	2.20415	1.98408	1.31829	0.210501	0.3279	ATS / KAN4	At5g42630	0.00106183	18422	12.8136	0.56013	7.45938	3.0007	1.7934	ATS / KAN4	At5g42630	0.0136719	38.8971	28.6408	7.49222	2.76409	ATS / KAN4	At5g42630	0.0305284	49.0979	26.93	11.8316	10.3362		Csa18g011370.1	Csa20g066330.1	Csa11g072430.1
KAN1	At5g16560	0.283897	14653	124.549	5.87741	2.83147	7.53952	24.4537	47.8015	36.0453	KAN1	At5g16560	0.0992596		36.84	7.5376	6.49323	9.41902	8.72265	3.0476	1.61991	KAN1	At5g16560	0.0398381	11733	480.745	75.6176	116.638	166.539	121.951	KAN1	At5g16560	0.0918337	261.271	73.8393	60.0656	127.366	KAN1	At5g16560	0.185612	298.513	82.8351	61.9498	153.728		Csa20g024440.1	Csa13g019350.1	Csa08g008740.1
GA1	At4g02780	0.273846	14843	118.935	67.345	11.1126	6.17251	3.38963	7.45041	23.4644	GA1	At4g02780	0.00738065		2.73932	0.0786989	1.25529	0.601746	0.0401333	0.288847	0.474605	GA1	At4g02780	0.0223326	13579	269.498	75.0575	67.8126	49.5116	77.1162	GA1	At4g02780	0.0257991	73.3994	6.66728	18.6364	48.0957	GA1	At4g02780	0.045167	72.6406	5.63694	11.0504	55.9532		Csa13g053900.1	Csa02g006120.1	Csa08g050550.1
TPL2	At2g18280	0.200451	14973	114.724	1.31752	13.7009	1.39977	19.0433	28.9026	50.3597	TPL2	At2g18280	0.303868		112.78	27.6403	15.2649	12.587	13.8468	18.2092	25.2319	TPL2	At2g18280	0.16938	5461	2043.99	141.713	761.535	724.669	416.069	TPL2	At2g18280		#N/A	#N/A	#N/A	#N/A	TPL2	At2g18280		#N/A	#N/A	#N/A	#N/A		Csa19g057880.1	Csa01g041410.1	Csa15g076840.1
MUCI21 / MUM5	At3g10320	0.178391	16216	83.9761	10.0465	7.44831	1.94607	21.5217	31.0178	11.9957	MUCI21 / MUM5	At3g10320	0.155688		57.7835	14.3557	19.1637	12.4029	9.50824	2.30956	0.043363	MUCI21 / MUM5	At3g10320	0.104476	7733	1260.76	53.7725	794.085	337.579	75.3228	MUCI21 / MUM5	At3g10320	0.0607496	172.835	44.538	122.54	5.75717	MUCI21 / MUM5	At3g10320	0.281287	452.384	66.2986	373.123	12.9624		Csa19g013880.1	Csa01g011160.1	Csa15g012800.1
SK11	At4g34210	0.176705	16699	74.7343	15.1704	14.7898	8.58592	19.6045	7.39659	9.18703	SK11	At4g34210			#N/A	#N/A	#N/A	#N/A	#N/A	#N/A	#N/A	SK11	At4g34210	0.0323127	12467	389.933	369.686	16.9531	1.50035	1.7934	SK11	At4g34210	0.00480772	13.6782	2.74357	3.4503	7.48429	SK11	At4g34210	0.0155686	25.0384	3.63555	5.75946	15.6434		#N/A	#N/A	#N/A
KAN2	At1g32240	0.170332	16743	74.0283	2.14358	3.64651	14.0158	1.8948	34.3837	17.944	KAN2	At1g32240	0.0754956		28.0201	6.00751	3.65246	4.2432	4.32465	7.31518	2.47706	KAN2	At1g32240	0.0330916	12367	399.332	36.9686	104.431	148.535	109.397	KAN2	At1g32240	0.326185	928.009	349.294	388.129	190.587	KAN2	At1g32240	0.601967	968.124	337.352	347.964	282.808		Csa14g042150.1	Csa17g051600.1	Csa03g036590.1
GID1B	At3g63010	0.127816	16896	71.3581	5.20244	3.63168	10.4257	40.8695	9.76229	1.46646	GID1B	At3g63010	0.0130286		4.83554	2.78776	0.65324	0.133354	0.973357	0.252328	0.0355023	GID1B	At3g63010	0.00196959	17643	23.7679	1.68039	12.2063	4.50105	5.3802	GID1B	At3g63010	0.0493587	140.428	35.2547	76.1479	29.025	GID1B	At3g63010	0.281652	452.972	41.1884	334.057	77.7272		Csa07g001600.1	Csa05g095330.1	Csa16g001570.1
PLC5	At5g58690	0.0971689	18266	53.5466	38.532	1.23397	0.676368	8.83921	3.13826	1.12676	PLC5	At5g58690	0.00424128		1.57414	0.538158	0.152318	0.110389	0.535314	0.176556	0.0614086	PLC5	At5g58690	0.0181266	14156	218.742	174.761	40.6875	1.50035	1.7934	PLC5	At5g58690		#N/A	#N/A	#N/A	#N/A	PLC5	At5g58690		#N/A	#N/A	#N/A	#N/A		Csa11g092420.1	Csa18g031870.1	#N/A
RUBY	At1g19900	0.0738168	19562	40.7076	8.33166	8.97858	3.25894	3.22562	3.96249	12.9503	RUBY	At1g19900	0.97485		361.814	26.0728	2.30717	20.6189	152.196	160.35	0.269994	RUBY	At1g19900	0.654497	1280	7898.13	2.80065	278.032	721.669	6895.63	RUBY	At1g19900	0.0195925	55.7414	16.1807	19.0955	20.4652	RUBY	At1g19900	0.021008	33.7865	13.5153	12.8621	7.40902		Csa03g023750.1	Csa17g025720.1	Csa14g025180.1
MYB52	At1g17950	0.0521578	20806	30.9245	4.33983	7.07712	7.52842	6.77902	2.5898	2.61035	MYB52	At1g17950	0.0533575		19.8035	9.3708	0.607208	5.294	3.01804	1.51349	0	MYB52	At1g17950	0.0142347	14735	171.777	3.36078	4.06875	141.033	23.3142	MYB52	At1g17950	0.0918471	261.309	44.1128	7.06281	210.133	MYB52	At1g17950	0.653722	1051.36	79.6128	38.4481	933.299		Csa03g021780.1	Csa14g022280.1	Csa17g023720.1
MYB23	At5g40330	0.0461884	21827	21.8508	5.15198	1.342	0.839555	4.67263	1.41808	8.42655	MYB23	At5g40330	0.0150595		5.5893	0	0.0190902	0.278264	0.625234	1.005	3.66171	MYB23	At5g40330		#N/A	#N/A	#N/A	#N/A	#N/A	#N/A	MYB23	At5g40330	0.00108058	3.07429	1.10491	1.48715	0.482228	MYB23	At5g40330	0.00264497	4.25381	0.51998	0.702427	3.0314		Csa11g057470.1	Csa10g047320.1	Csa12g079750.1
MYB75	At1g56650	0	22128	19.35	0.777235	3.05606	0.570729	8.30666	1.92543	4.71387	MYB75	At1g56650	0.000988586		0.366912	0.240704	0	0	0.126208	0	0	MYB75	At1g56650		#N/A	#N/A	#N/A	#N/A	#N/A	#N/A	MYB75	At1g56650	0.00932024	26.5165	20.2179	3.30552	2.99308	MYB75	At1g56650	0.0300056	48.257	18.6835	2.35147	27.2221		Csa05g063440.1	Csa07g026580.1	Csa17g099090.1
SOS5	AT3g46550			#N/A	#N/A	#N/A	#N/A	#N/A	#N/A	#N/A	SOS5	AT3g46550	0.0557715		20.6995	8.13203	3.97427	2.74246	4.05832	1.61221	0.180192	SOS5	AT3g46550	0.185948		2243.92	1194.2	577.085	325.576	147.059	SOS5	AT3g46550		#N/A	#N/A	#N/A	#N/A	SOS5	AT3g46550		#N/A	#N/A	#N/A	#N/A		Csa04g029310.1	Csa06g020320.1	Csa09g042620.1
DOF4.2	AT4g21030			#N/A	#N/A	#N/A	#N/A	#N/A	#N/A	#N/A	DOF4.2	AT4g21030			#N/A	#N/A	#N/A	#N/A	#N/A	#N/A	#N/A	DOF4.2	AT4g21030	0.00386529		46.6443	1.12026	33.2282	10.5025	1.7934	DOF4.2	AT4g21030		#N/A	#N/A	#N/A	#N/A	DOF4.2	AT4g21030		#N/A	#N/A	#N/A	#N/A		#N/A	#N/A	#N/A
YIP4B	AT4g30260			#N/A	#N/A	#N/A	#N/A	#N/A	#N/A	#N/A	YIP4B	AT4g30260	0.488244		181.211	55.4418	31.6141	28.3416	29.9266	20.8608	15.0261	YIP4B	AT4g30260	0.222411		2683.94	621.185	794.085	648.151	620.517	YIP4B	AT4g30260		#N/A	#N/A	#N/A	#N/A	YIP4B	AT4g30260		#N/A	#N/A	#N/A	#N/A		Csa12g016900.1	Csa10g012240.1	Csa11g013150.1
TBA1	AT1g62000			#N/A	#N/A	#N/A	#N/A	#N/A	#N/A	#N/A	TBA1	AT1g62000	18.4512		6848.14	1987.09	3815.15	266.24	773.246	4.98965	1.42333	TBA1	AT1g62000			#N/A	#N/A	#N/A	#N/A	#N/A	TBA1	AT1g62000		#N/A	#N/A	#N/A	#N/A	TBA1	AT1g62000		#N/A	#N/A	#N/A	#N/A		Csa09g096540.1	0	0
TBA3	AT1g62080			#N/A	#N/A	#N/A	#N/A	#N/A	#N/A	#N/A	TBA3	AT1g62080			#N/A	#N/A	#N/A	#N/A	#N/A	#N/A	#N/A	TBA3	AT1g62080			#N/A	#N/A	#N/A	#N/A	#N/A	TBA3	AT1g62080		#N/A	#N/A	#N/A	#N/A	TBA3	AT1g62080		#N/A	#N/A	#N/A	#N/A		#N/A	#N/A	#N/A
TBAL	AT1g62220			#N/A	#N/A	#N/A	#N/A	#N/A	#N/A	#N/A	TBAL	AT1g62220	39.0402		14277.9	2066.23	11420.9	275.095	482.662	32.1743	0.836196	TBAL	AT1g62220			#N/A	#N/A	#N/A	#N/A	#N/A	TBAL	AT1g62220		#N/A	#N/A	#N/A	#N/A	TBAL	AT1g62220		#N/A	#N/A	#N/A	#N/A		Csa09g096810.1	Csa16g054920.1	Csa07g063470.1
SK12	AT4g34470			#N/A	#N/A	#N/A	#N/A	#N/A	#N/A	#N/A	SK12	AT4g34470	0.0011819		0.438659	0.423457	0.0152027	0	0	0	0	SK12	AT4g34470			#N/A	#N/A	#N/A	#N/A	#N/A	SK12	AT4g34470		#N/A	#N/A	#N/A	#N/A	SK12	AT4g34470		#N/A	#N/A	#N/A	#N/A		Csa10g007660.1	Csa12g009110.1	Csa11g007460.1
MEAN %		3.75485											0.915215											0.267923									0.58039							1.08237
SD		5.71458											4.25522											0.313987									0.835976							1.64853
p-value											At vs Cs	3.03422e-09										At vs Bn	3.32277e-09								At vs Aa MYX+	4.88976e-07						At vs Aa MYX-	1.16258e-05
																						Cs vs Bn	0.0520339								Cs vs Aa MYX+	0.000538322						Cs vs Aa MYX-	6.83182e-06
																															Bn vs Aa MYX+	0.0002098						Bn vs Aa MYX-	5.9128e-06
																																						Aa MYX+ vs Aa MYX-	8.71026e-07
TOTAL %		371.73											92.4367											24.9168									47.0116							87.6721
TOTAL % (%)		100											24.8666											6.70293									12.6467							23.5849

## Sheet: Fig 7 GRAPH (0-1-40)
Figure 7: Comparison of the relative expression values of the A. thaliana MSC tool box genes and of their ortholog genes from C. sativa, B. napus, and A. arabicum (myxospermous and non myxospermous dimorphic diaspores) during whole seed development. The expression value of each A. thaliana MSC tool box ortholog gene was summed for the whole seed development kinetics samples and were displayed in …
	0		1	40
ANNOT	A. thaliana (1) Myxosp.	C. sativa (6) Myxosp.	B. napus (13) Non Myxosp.	A. arabicum (27) Myxosp.	A. arabicum (27) Non Myxosp.		ANNOT	A. thaliana (1) Myxosp.	C. sativa (6) Myxosp.	B. napus (13) Non Myxosp.	A. arabicum (27) Myxosp.	A. arabicum (27) Non Myxosp.
MEAN TOP10 GENES	100	100	100	100	100
TBA2	33.2782	#N/A	#N/A	#N/A	#N/A		AP1M2	1.63509	0.297271	0.0144295	0.875642	1.40697
SBT1.7 / ARA12	30.5381	2.34091	0.625224	5.27669	10.5611		CSLA2	1.53497	0.455736	0.414135	1.24227	2.33546
PME58	26.6517	0.415935	#N/A	#N/A	#N/A		EXO70A1	1.42689	0.318991	0.132788	0.509967	0.968041
MUM4 / RHM2	14.9396	0.52863	0.0644564	0.590998	0.99406		PRX36	1.2616	0.0636223	0.152449	0.542085	1.19237
SHP2	14.5182	0.642586	0.356346	0.219338	0.402562		MUM3 / CESA5	1.17821	0.334368	0.840963	#N/A	#N/A
KNAT7	12.7748	0.582915	0.144894	0.340326	1.01094		ABA1	1.09967	0.66462	1.11848	1.29107	1.98612
STK	11.8358	0.777034	0.0414005	0.235539	0.721708		MUCI70	1.03961	0.161972	0.265716	0.206828	0.39026
AP2	10.8122	0.143613	0.211623	#N/A	#N/A		BLH2	1.02499	0.143721	0.178731	#N/A	#N/A
COBL2	10.7083	0.445706	0.141546	#N/A	#N/A		TTG2 / DSL1	0.962723	0.0953199	0.0613646	0.04756	0.0918205
SHP1	8.69982	0.0970065	0.195663	0.0470426	0.126945		BLH4	0.95034	0.158885	0.229741	#N/A	#N/A
SKD1	8.66854	0.208464	0.635194	1.86757	3.87297		NARS1	0.877445	1.00931	0.760792	0.166158	0.677287
HMS	8.61325	1.02372	0.548936	0.466834	0.938339		STL1	0.828001	0.0963378	0.453944	1.37166	2.45895
FEI2	8.46365	0.26773	0.403873	0.627876	1.12109		PMEI6	0.805421	0.0923413	0.0594048	0.285199	0.679381
GL2	6.55188	0.174498	0.25131	0.468147	0.703807		STL2	0.804316	0.206378	#N/A	#N/A	#N/A
PMEI14	6.11085	0.395701	#N/A	#N/A	#N/A		RAPTOR1B	0.739453	0.147824	0.302833	0.791117	1.35872
DIR12 / DP1	6.04025	1.26049	#N/A	#N/A	#N/A		FLY2	0.707634	0.0728975	0.080914	0.412415	0.930459
NARS2 / NAM	5.87972	1.04906	0.108392	#N/A	#N/A		GALT5	0.592464	0.0564316	0.192811	0.283095	0.514667
UAFT2	5.44267	0.853702	0.638128	#N/A	#N/A		GALT2	0.559165	0.076957	0.0452436	0.0726736	0.115383
BXL1	5.15319	1.07961	2.21866	2.92722	7.40217		AMP1	0.55049	0.0533819	0.0415848	0.334101	0.624898
SEP3	4.49222	0.192867	0.376616	#N/A	#N/A		DUF793	0.52137	0.0828046	0.125083	0.290885	0.297731
MYB5	4.37898	0.140667	0.0701973	0.0242726	0.0456315		INO	0.498508	0.00821634	0.03478	0.0228661	0.0436738
TT2	4.37496	0.0321375	0.0429572	0.0165924	0.0243787		GALT3	0.425439	0.114834	0.0990381	0.0131011	0.0299456
AGAL3	4.23303	0.405537	0.497063	0.533909	0.672834		IRX7	0.371866	0.135758	0.120829	0.268304	0.675068
CESA2	4.15705	0.734065	0.715388	1.06228	1.40957		AGAL2	0.357332	0.0316051	0.0157447	0.0257189	0.0352676
MUCI10	4.05841	0.331917	0.216701	0.722206	1.42269		ABS / TT16	0.329654	0.0560068	0.35336	0.0495585	0.110195
GA3OX4	3.90795	0.0168817	0.0891203	0.152139	0.316434		CESA9	0.327226	#N/A	#N/A	0.0285275	0.041558
MUR1	3.80034	0.178018	0.422163	0.985493	1.21757		PLC7	0.319467	0.0323061	0.00736751	0.0242193	0.0601087
GID1A	3.76813	0.525995	0.167993	0.428938	1.03061		ROH1	0.311328	0.00882918	0.0308198	0.0341522	0.0564857
URGT2	3.66667	0.293339	0.272524	3.55128	6.77273		ATS / KAN4	0.297298	0.0176727	0.00106183	0.0136719	0.0305284
RRT1	3.63444	2.46248	0.38087	#N/A	#N/A		KAN1	0.283897	0.0992596	0.0398381	0.0918337	0.185612
UUAT3	3.40096	0.122835	0.0889479	#N/A	#N/A		GA1	0.273846	0.00738065	0.0223326	0.0257991	0.045167
FLY1	3.22572	0.415581	0.262921	0.646282	1.33962		TPL2	0.200451	0.303868	0.16938	#N/A	#N/A
MOR1	3.18322	0.213393	0.792042	1.38052	2.72802		MUCI21 / MUM5	0.178391	0.155688	0.104476	0.0607496	0.281287
TT8	3.11167	0.228447	0.142337	0.163961	0.324738		SK11	0.176705	#N/A	0.0323127	0.00480772	0.0155686
ADK1	2.9626	1.67967	0.42407	#N/A	#N/A		KAN2	0.170332	0.0754956	0.0330916	0.326185	0.601967
GALT6	2.95689	0.660429	0.463958	0.132829	0.238468		GID1B	0.127816	0.0130286	0.00196959	0.0493587	0.281652
SEC8	2.79798	0.0557675	0.353958	1.06513	1.65287		PLC5	0.0971689	0.00424128	0.0181266	#N/A	#N/A
UUAT1	2.77203	0.140976	0.0509978	0.935355	1.10298		RUBY	0.0738168	0.97485	0.654497	0.0195925	0.021008
TTG1	2.75664	0.173879	0.0854896	0.441409	0.820263		MYB52	0.0521578	0.0533575	0.0142347	0.0918471	0.653722
IRX14	2.71243	0.355865	0.12282	0.326502	0.802098		MYB23	0.0461884	0.0150595	#N/A	0.00108058	0.00264497
MYB61	2.70873	0.505161	0.18896	0.105684	0.271566		MYB75	0	0.000988586	#N/A	0.00932024	0.0300056
REV	2.66941	0.267661	0.165737	1.11683	1.38384		SOS5	#N/A	0.0557715	0.185948	#N/A	#N/A
PRX56	2.48268	0.176548	0.000607639	0.254994	0.523577		DOF4.2	#N/A	#N/A	0.00386529	#N/A	#N/A
GATL5	2.37564	0.544466	0.0117476	0.141083	0.245566		YIP4B	#N/A	0.488244	0.222411	#N/A	#N/A
YIP4A	2.21092	0.0876311	#N/A	1.92948	2.92924		TBA1	#N/A	18.4512	#N/A	#N/A	#N/A
MUM2 / BGAL6	2.19721	0.483883	0.128421	0.0442001	0.232272		TBA3	#N/A	#N/A	#N/A	#N/A	#N/A
ECH	2.17668	0.663063	0.248852	0.345297	0.602431		TBAL	#N/A	39.0402	#N/A	#N/A	#N/A
TRM4	2.14313	0.116251	0.196493	1.18287	2.04765		SK12	#N/A	0.0011819	#N/A	#N/A	#N/A
RSW3	2.0858	0.529464	0.563606	2.00726	2.77285
GALT4	2.06506	0.142027	0.18665	0.366758	0.498182		Mean	3.75485	0.915215	0.267923	0.58039	1.08237
HB25 / ZFHD2	2.04314	0.294847	0.165259	0.0753039	0.186218		SD	5.71458	4.25522	0.31782	0.835976	1.64853
LUH / MUM1	1.87447	0.304559	0.514292	0.520175	0.969961		p-value		3.03422e-09	3.32277e-09	4.88976e-07	1.16258e-05
ENY / IDD1	1.86771	0.50842	0.311721	0.218778	0.608034					0.0520339	0.000538322	6.83182e-06
DF1	1.84498	0.549482	0.488757	0.625462	0.982229						0.0002098	5.9128e-06
GAUT11	1.75539	0.0861344	0.0717796	0.340584	0.579059							8.71026e-07
EGL3	1.7496	0.0944058	0.0322469	0.235919	0.413101
LUG	1.71551	0.234783	0.507515	0.858643	1.51155		TOTAL %	371.73	92.4367	24.9168	47.0116	87.6721
DCR	1.71197	0.465672	0.872478	1.12216	1.90767		TOTAL % (%)	100	24.8666	6.70293	47.0116	87.6721
													At
													Cs
													Bn
													Aa MYX
													Aa NON MYX
